# Supplementary material
Source: Royal Society of Chemistry journal article supplement (doi:10.1039/d6ob00263c)
Supplement: d6ob00263c1.pdf [file d6ob00263c1.pdf]

## SUPPORTING INFORMATION

### Construction of 2*H*-1,4-selenazin-3(4*H*)-one framework via cyclization of pyrazole derivatives bearing chloroacetamide and selenocyanate fragments

Tatiana A. Kudryavtseva, Ekaterina N. Kudryavtseva and Boris V. Lichitsky\*

N.D. Zelinsky Institute of Organic Chemistry, Russian Academy of Sciences, Leninsky Pr. 47, Moscow 119991, Russian Federation

|                                                                 |     |
|-----------------------------------------------------------------|-----|
| 1. General procedures.....                                      | 2   |
| 2. Copies of NMR and HRMS spectra for compounds <b>3</b> .....  | 5   |
| 3. Copies of NMR and HRMS spectra for compound <b>4</b> .....   | 23  |
| 4. Copies of NMR and HRMS spectra for compound <b>5</b> .....   | 56  |
| 5. Copies of NMR and HRMS spectra for compound <b>6</b> .....   | 58  |
| 6. Copies of NMR and HRMS spectra for compounds <b>7</b> .....  | 88  |
| 7. Copies of NMR and HRMS spectra for compound <b>8</b> .....   | 91  |
| 8. Copies of NMR and HRMS spectra for compound <b>9</b> .....   | 94  |
| 9. Copies of NMR and HRMS spectra for compound <b>10</b> .....  | 96  |
| 10. Copies of NMR and HRMS spectra for compound <b>11</b> ..... | 99  |
| 11. Copies of NMR and HRMS spectra for compound <b>14</b> ..... | 102 |
| 12. Copies of NMR and HRMS spectra for compound <b>15</b> ..... | 105 |
| 13. Copies of NMR and HRMS spectra for compound <b>17</b> ..... | 108 |
| 14. Copies of NMR and HRMS spectra for compound <b>19</b> ..... | 114 |
| 15. Copies of NMR and HRMS spectra for compound <b>20</b> ..... | 116 |
| 16. Copies of NMR and HRMS spectra for compound <b>21</b> ..... | 119 |
| 17. X-ray crystallographic data and refinement details.....     | 122 |

### **General Procedure for the Synthesis of Compounds 3a-k and 13**

A mixture of 5-aminopyrazole (4 mmol) and corresponding acylating agent (6 mmol) was stirred at room temperature in DMF (8 mL) for 3 h. Then, water (40 mL) was added. For compounds 3a-c,f-i,k the precipitated product was filtered off, washed with water (3 × 30 mL) and air dried. For compounds 3d,e,j and 13 the target product was obtained by extraction with ethyl acetate (3 × 20 mL) and washed with water (3 × 20 mL). Evaporation of the solvent afforded amides 3d,e,j and 13 which were used further without additional purification.

#### **Synthesis of 2-chloro-*N*-(1-(2-chloroacetyl)-3-methyl-1*H*-pyrazol-5-yl)acetamide 5**

A mixture of 3-methyl-1*H*-pyrazol-5-amine (4 mmol, 0.39 g) and chloroacetyl chloride (12 mmol, 1.36 g) was stirred at room temperature in DMF (8 mL) for 3 h. Then, water (40 mL) was added. The precipitated product 5 was filtered off, washed with water (3 × 30 mL) and air dried.

#### **Synthesis of 2-chloro-*N*-(3-methyl-1*H*-pyrazol-5-yl)acetamide 3l**

A solution of amide 5 (2 mmol, 0.50 g) in MeOH (10 mL) was refluxed for 3 h. Then, evaporation of the solvent afforded pure target product 3l.

#### **Synthesis of 2-bromo-2-methyl-*N*-(3-methyl-1-phenyl-1*H*-pyrazol-5-yl)propanamide 9**

A mixture of 5-aminopyrazole 1a (4 mmol, 0.69 g) and 2-bromo-2-methylpropanoyl bromide (6 mmol, 1.38 g) was stirred at room temperature in MeCN (8 mL) for 24 h. Then, water (40 mL) and NaHCO<sub>3</sub> (24 mmol, 2.00 g) were added and the reaction mixture was stirred at room temperature for 8 h. Then, the precipitated product Na was filtered off, washed with water (3 × 30 mL) and air dried.

### **General Procedure for the Synthesis of selenocyanates 4, 10 and 14**

A mixture of malononitrile (3 mmol, 0.20 g), SeO<sub>2</sub> (6 mmol, 0.67 g) in DMF (2 mL) was stirred at room temperature for 0.25 h. Then, corresponding amide 3, 9 or 13 (2 mmol) was added to the mixture and the resulted solution was stirred for 2 h. After this, 20 mL of water was added and the obtained mixture was stirred for 2 h. The precipitated product was filtered off, washed with water (3 × 20 mL) and air dried.

#### **General Procedure for the Synthesis of pyrazolo[4,3-*b*][1,4]selenazin-6(5*H*)-ones 6**

A mixture of corresponding selenocyanate 4 (0.4 mmol) and sodium cyanoborohydride (4 mmol, 0.25 g) in MeOH (10 mL) was stirred at room temperature for 48 h. Then, the solvent was evaporated and the residue was stirred in water (5 mL) for 1 h (in the case of compound 4f conc. HCl (0.1 mL) was added

to the water). The precipitated product was filtered off, washed with water ( $3 \times 20$  mL) and air dried.

### **Synthesis of compound 7**

A mixture of selenocyanate **4g** (0.4 mmol, 0.16 g) and sodium cyanoborohydride (4 mmol, 0.25 g) in MeOH (10 mL) was stirred at room temperature for 48 h. Then, the reaction mixture was evaporated and the residue was stirred in water (5 mL) for 1 h. The precipitated diselenide was filtered off, washed with water ( $3 \times 20$  mL) and air dried.

### **Synthesis of compound 11**

A mixture of selenocyanate **10** (0.4 mmol, 0.17 g) and sodium cyanoborohydride (4 mmol, 0.25 g) in MeOH (10 mL) was stirred at room temperature for 48 h. Then, the reaction mixture was evaporated and the residue was stirred in water (5 mL) for 1 h. The precipitated diselenide was filtered off, washed with water ( $3 \times 20$  mL) and air dried.

### **Synthesis of compound 15**

A mixture of selenocyanate **14** (0.4 mmol, 0.15 g) and sodium cyanoborohydride (4 mmol, 0.25 g) in MeOH (10 mL) was stirred at room temperature for 48 h. Then, the reaction mixture was evaporated and the residue was stirred in water (5 mL) for 1 h. The precipitated diselenide was filtered off, washed with water ( $3 \times 20$  mL) and air dried.

### **Synthesis of selenoether 17a**

A mixture of selenocyanate **10** (0.4 mmol, 0.15 g), iodomethane (4 mmol, 0.57 g) and sodium cyanoborohydride (4 mmol, 0.25 g) in MeOH (10 mL) was stirred at room temperature for 48 h. Then, the reaction mixture was evaporated and the residue was stirred in water (5 mL) for 1 h. The precipitated product was filtered off, washed with water ( $3 \times 20$  mL) and air dried.

### **Synthesis of selenoether 17b**

A mixture of selenocyanate **10** (0.4 mmol, 0.15 g), chloroacetonitrile (4 mmol, 0.30 g) and sodium cyanoborohydride (4 mmol, 0.25 g) in MeOH (10 mL) was stirred at room temperature for 48 h. Then, the reaction mixture was evaporated and the residue was stirred in water (5 mL) for 1 h. The precipitated product was filtered off, washed with water ( $3 \times 20$  mL) and air dried.

### **Synthesis of compound 19**

A mixture of oxalate of aminothiophene **18** (4 mmol, 0.97 g) and chloroacetyl chloride (6 mmol, 0.68 g) in DMF (8 mL) was stirred at room temperature for 3 h.

Then, water (40 mL) was added. The precipitated product Na was filtered off, washed with water ( $3 \times 30$  mL) and air dried.

### Synthesis of compound 20

A mixture of malononitrile (3 mmol, 0.20 g) and  $\text{SeO}_2$  (6 mmol, 0.67 g) in DMF (2 mL) was stirred at room temperature for 0.25 h. Then, chloroacetamide 19 (2 mmol, 0.46 g) was added to the mixture and the resulted solution was stirred for 2 h. After this, 20 mL of water was added and the obtained mixture was stirred for 2 h. The precipitated product was filtered off, washed with water ( $3 \times 20$  ml) and air dried.

### Synthesis of compound 21

A mixture of selenocyanate **20** (0.4 mmol, 0.13 g) and sodium cyanoborohydride (4 mmol, 0.25 g) in MeOH (10 mL) was stirred at room temperature for 48 h. Then, the reaction mixture was evaporated and the residue was stirred in water (5 mL) for 1 h. The precipitated product was filtered off, washed with water ( $3 \times 20$  mL) and air dried.

**Table 1.** Structures of the starting 5-aminopyrazoles

|           |                                                                                     |           |                                                                                      |           |                                                                                       |
|-----------|-------------------------------------------------------------------------------------|-----------|--------------------------------------------------------------------------------------|-----------|---------------------------------------------------------------------------------------|
| <b>1a</b> | 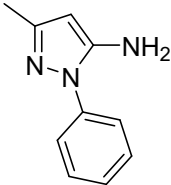 | <b>1e</b> |  | <b>1i</b> |  |
| <b>1b</b> |  | <b>1f</b> |  | <b>1j</b> |  |
| <b>1c</b> |  | <b>1g</b> |  | <b>1k</b> |  |
| <b>1d</b> |  | <b>1h</b> |  | <b>1l</b> |  |

## NMR and HRMS spectra for compounds 3

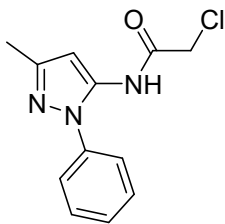

### 2-Chloro-N-(3-methyl-1-phenyl-1H-pyrazol-5-yl)acetamide, **3a**

White powder, m.p. 166-168°C, yield 75% (0.75 g)

$^1\text{H}$  NMR (300 MHz, DMSO- $d_6$ )  $\delta$  10.26 (s, 1H), 7.52 – 7.45 (m, 4H), 7.40 – 7.34 (m, 1H), 6.26 (s, 1H), 4.23 (s, 2H), 2.21 (s, 3H).  $^{13}\text{C}\{^1\text{H}\}$  NMR (76 MHz, DMSO)  $\delta$  165.32, 148.10, 138.48, 135.47, 129.21, 127.23, 123.47, 102.13, 42.64, 13.77. HRMS (ESI-TOF):  $m/z$   $[\text{M}+\text{H}]^+$ : calcd for  $[\text{C}_{12}\text{H}_{13}\text{ClN}_3\text{O}]^+$ : 250.0742; found: 250.0745.

**Figure-1:**  $^1\text{H}$  NMR spectrum (300 MHz) of **3a** in DMSO- $d_6$

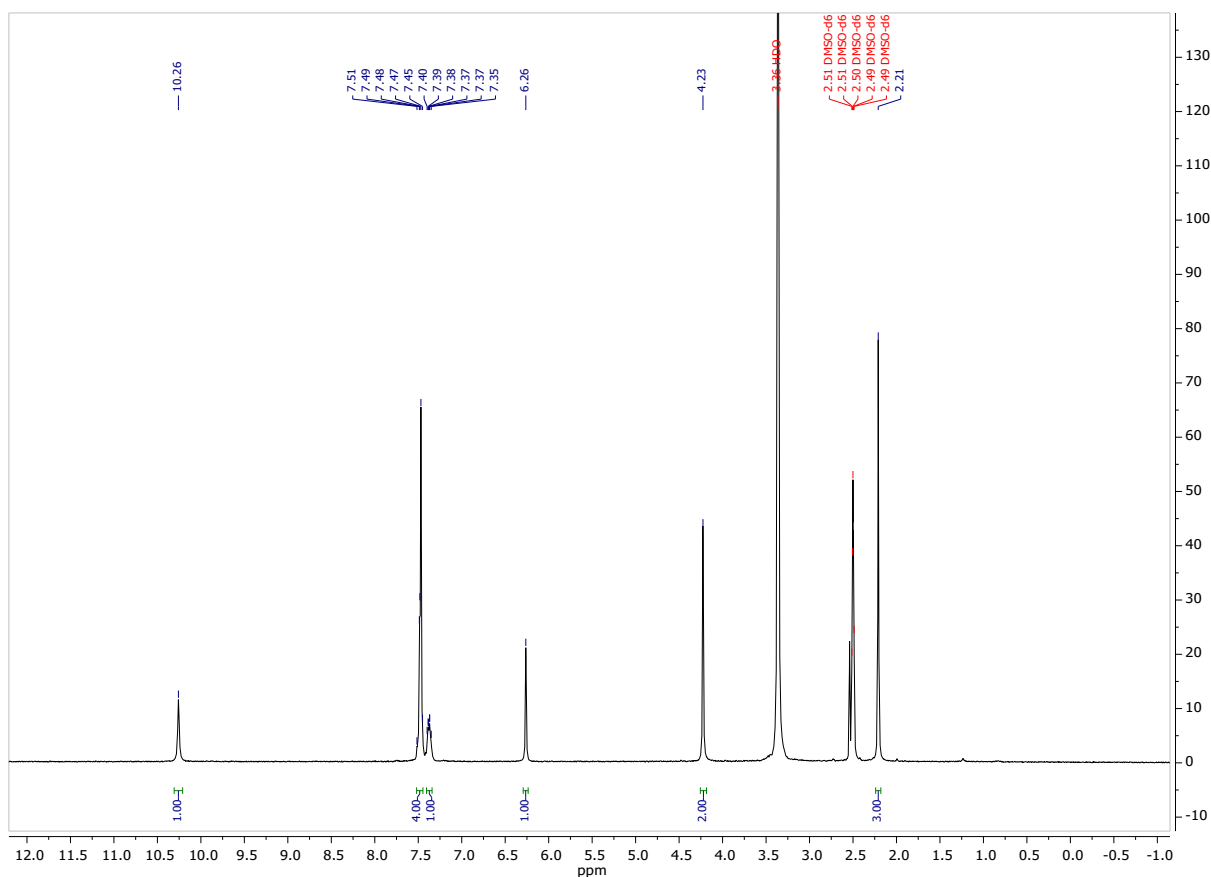

**Figure-2:**  $^{13}\text{C}$  NMR spectrum (76 MHz) of **3a** in  $\text{DMSO-}d_6$

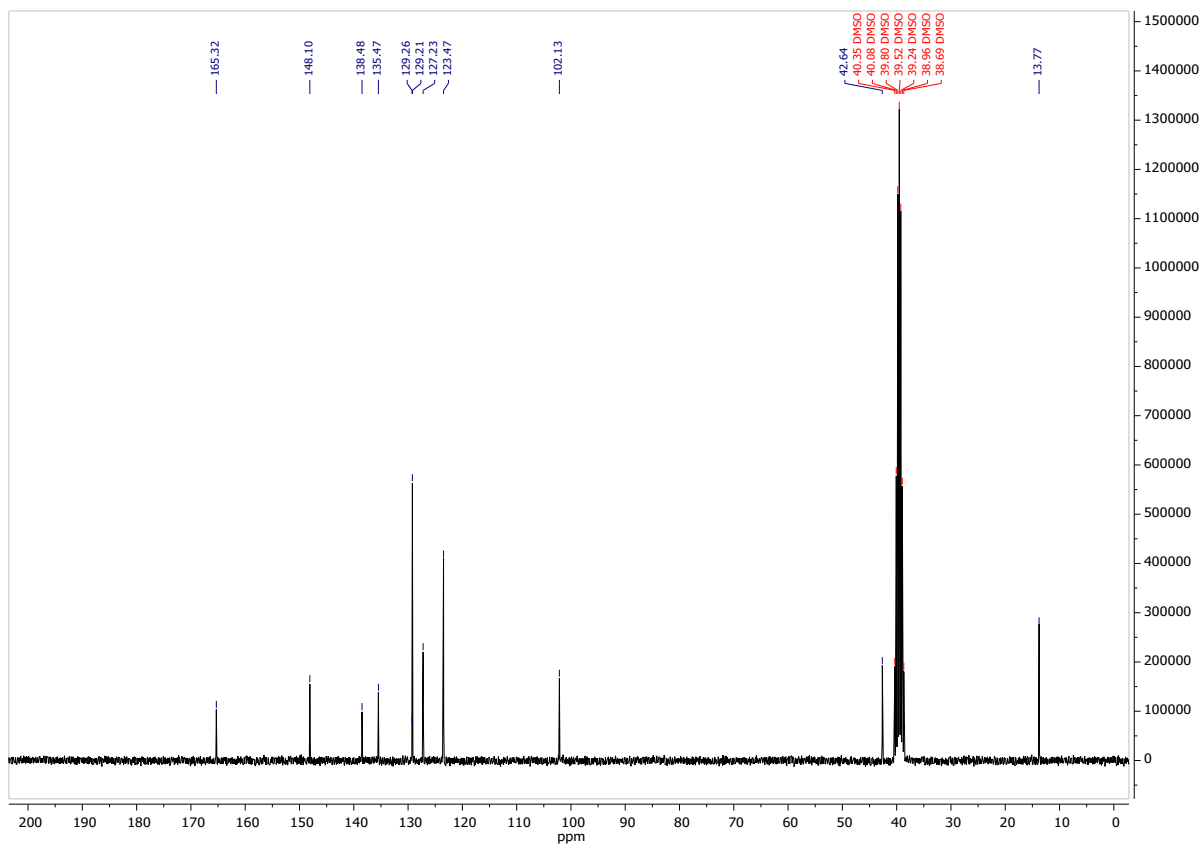

**Figure-3:** HRMS spectrum of compound **3a**

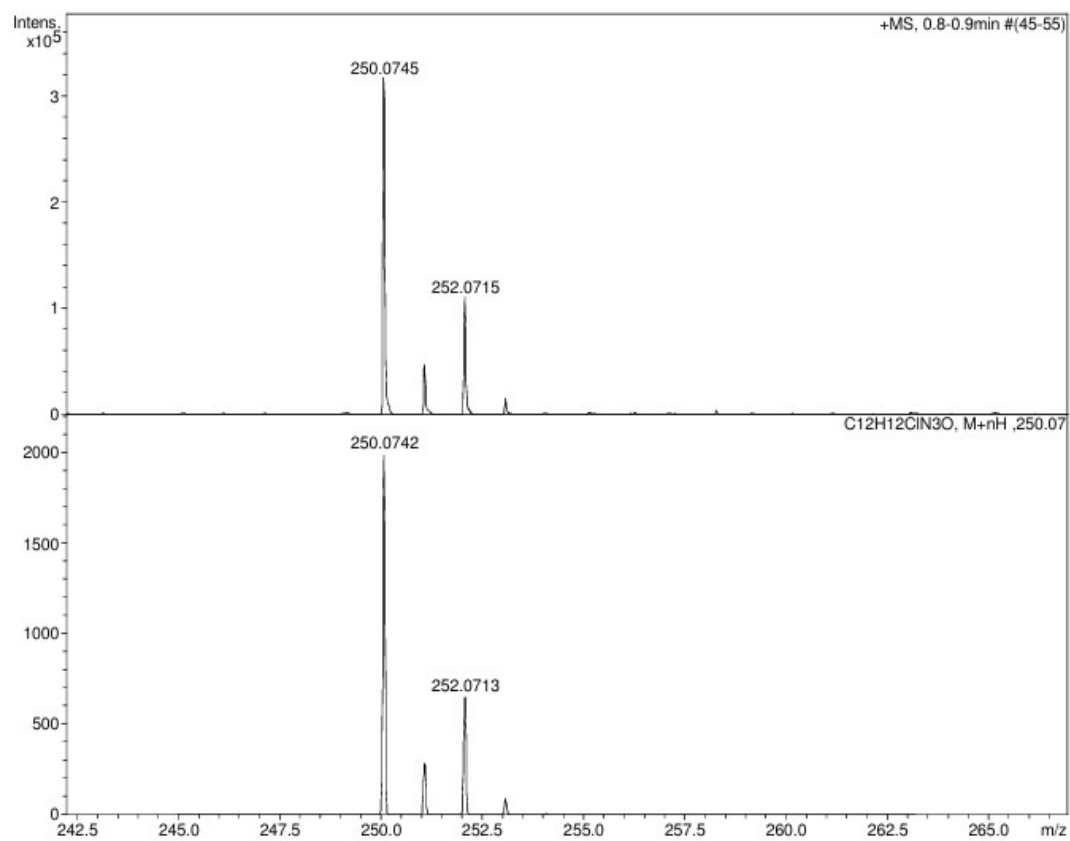

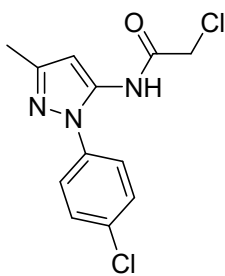

*2-Chloro-N-(1-(4-chlorophenyl)-3-methyl-1H-pyrazol-5-yl)acetamide, 3b*

White powder, m.p. 168-170°C, yield 89% (1 g)

$^1\text{H}$  NMR (300 MHz,  $\text{DMSO-}d_6$ )  $\delta$  10.59 (s, 1H), 7.85 – 7.77 (m, 4H), 6.57 (s, 1H), 4.53 (s, 2H), 2.50 (s, 3H).  $^{13}\text{C}\{^1\text{H}\}$  NMR (76 MHz,  $\text{DMSO}$ )  $\delta$  164.92, 148.13, 136.99, 135.31, 131.13, 128.81, 124.74, 101.88, 42.28, 13.38. HRMS (ESI-TOF):  $m/z$   $[\text{M}+\text{H}]^+$ : calcd for  $[\text{C}_{12}\text{H}_{12}\text{Cl}_2\text{N}_3\text{O}]^+$ : 284.0352; found: 284.0356.

**Figure-4:**  $^1\text{H}$  NMR spectrum (300 MHz) of **3b** in  $\text{DMSO-}d_6$

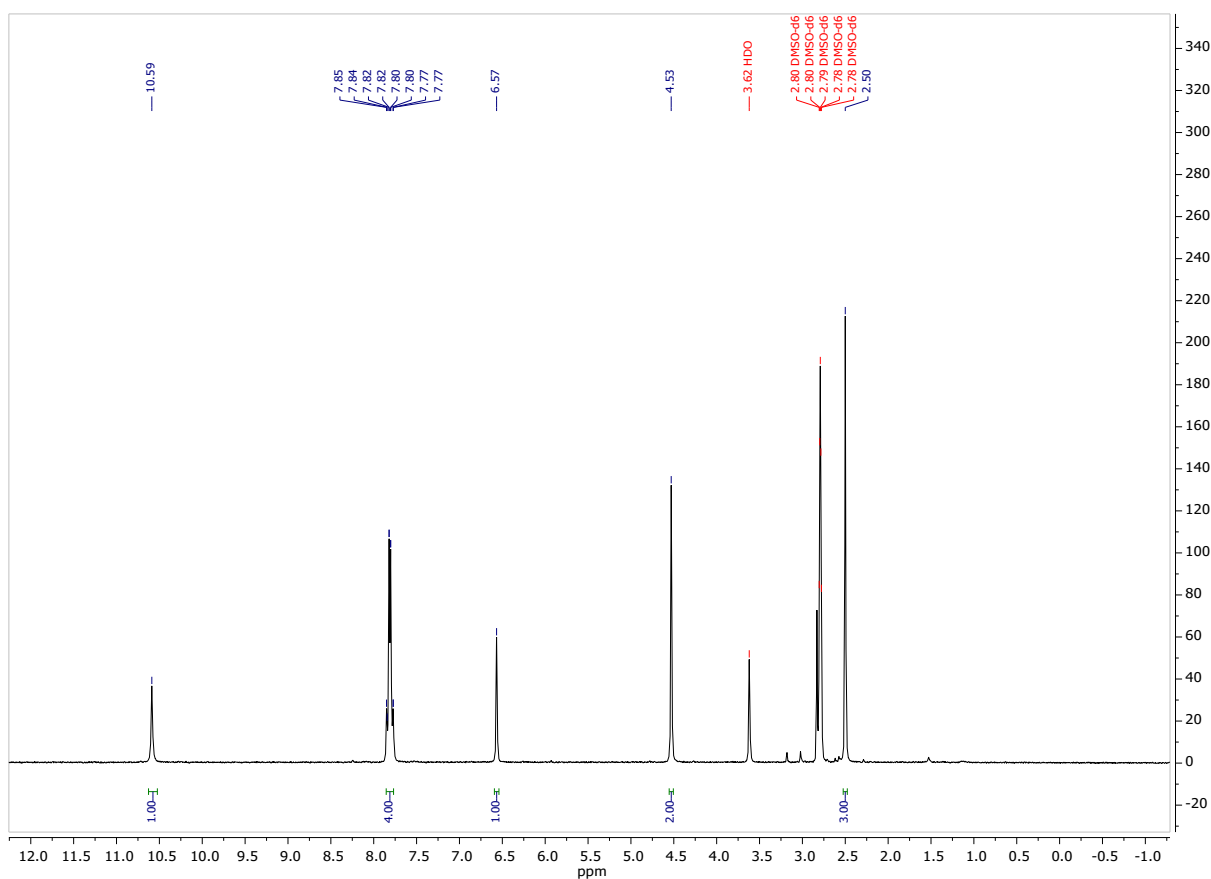

**Figure-5:**  $^{13}\text{C}$  NMR spectrum (76 MHz) of **3b** in  $\text{DMSO-}d_6$

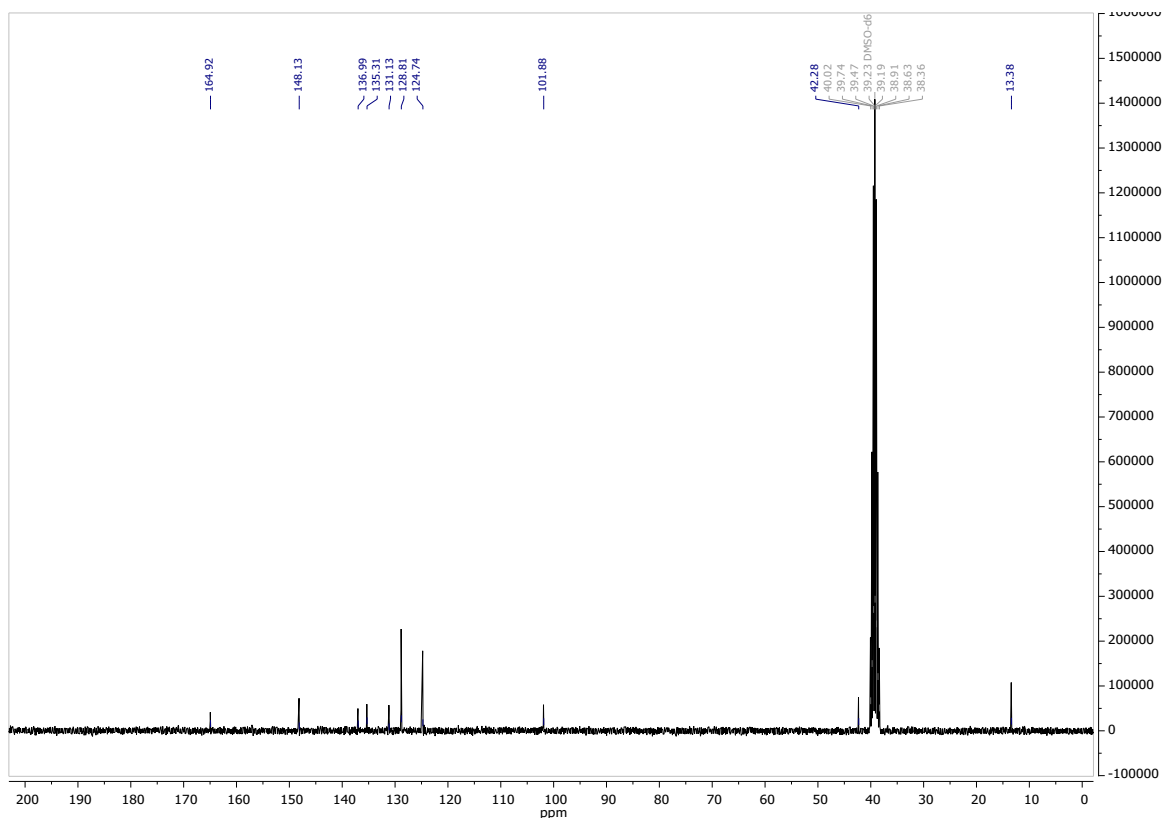

**Figure-6:** HRMS spectrum of compound **3b**

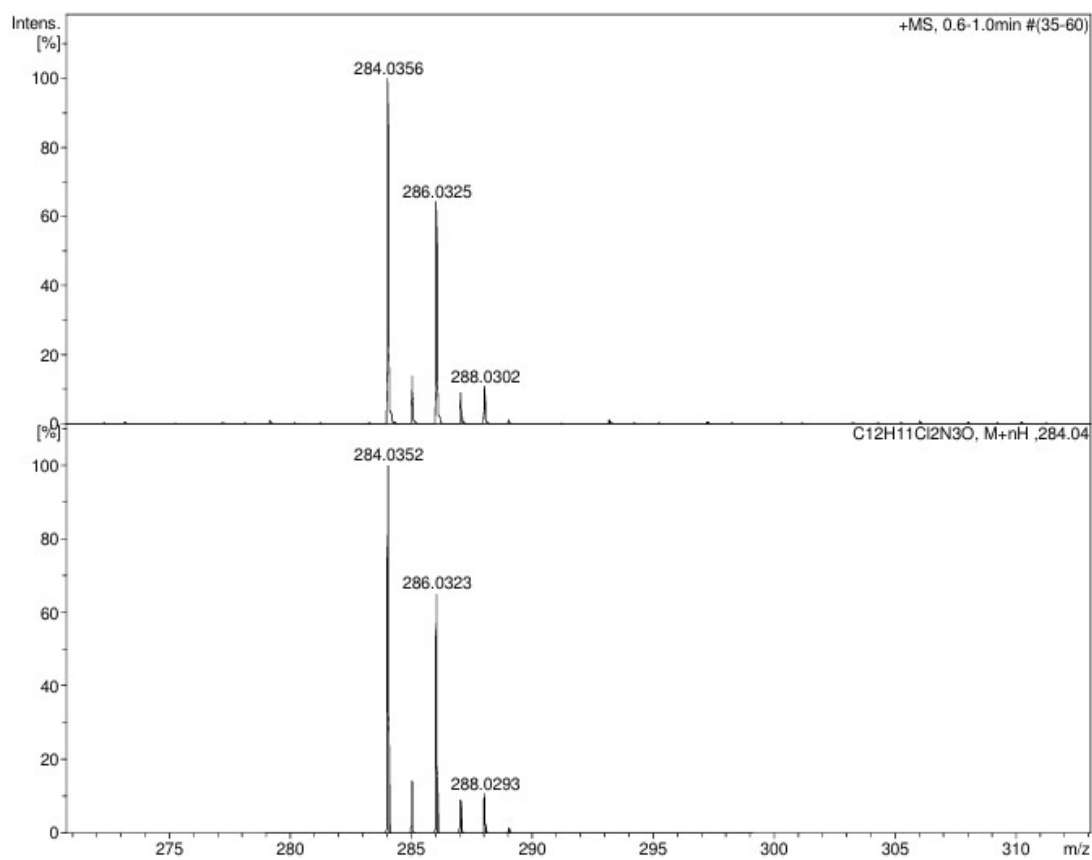

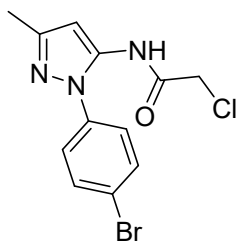

*N*-(1-(4-bromophenyl)-3-methyl-1*H*-pyrazol-5-yl)-2-chloroacetamide, **3c**

White powder, m.p. 180-182°C, yield 94% (1.23 g)

$^1\text{H}$  NMR (300 MHz, DMSO- $d_6$ )  $\delta$  10.30 (s, 1H), 7.67 (d,  $J = 8.8$  Hz, 2H), 7.44 (d,  $J = 8.7$  Hz, 2H), 6.28 (s, 1H), 4.24 (s, 2H), 2.21 (s, 3H).  $^{13}\text{C}\{^1\text{H}\}$  NMR (76 MHz, DMSO)  $\delta$  165.34, 148.57, 137.76, 135.66, 132.11, 125.36, 119.86, 102.36, 42.65, 13.75. HRMS (ESI-TOF):  $m/z$   $[\text{M}+\text{H}]^+$ : calcd for  $[\text{C}_{12}\text{H}_{12}\text{BrClN}_3\text{O}]^+$ : 329.9826; found: 329.9825.

**Figure-7:**  $^1\text{H}$  NMR spectrum (300 MHz) of **3c** in DMSO- $d_6$

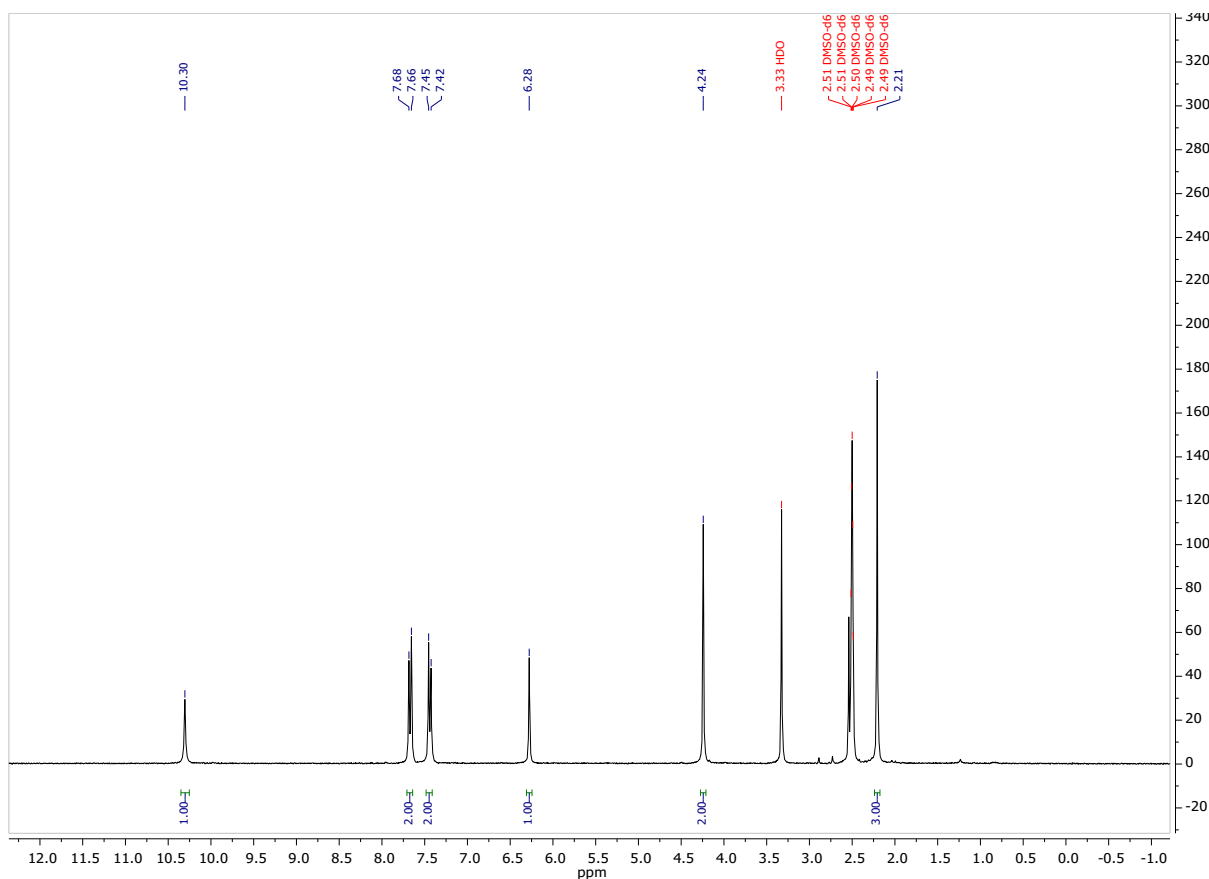

**Figure-8:**  $^{13}\text{C}$  NMR spectrum (76 MHz) of **3c** in  $\text{DMSO-}d_6$

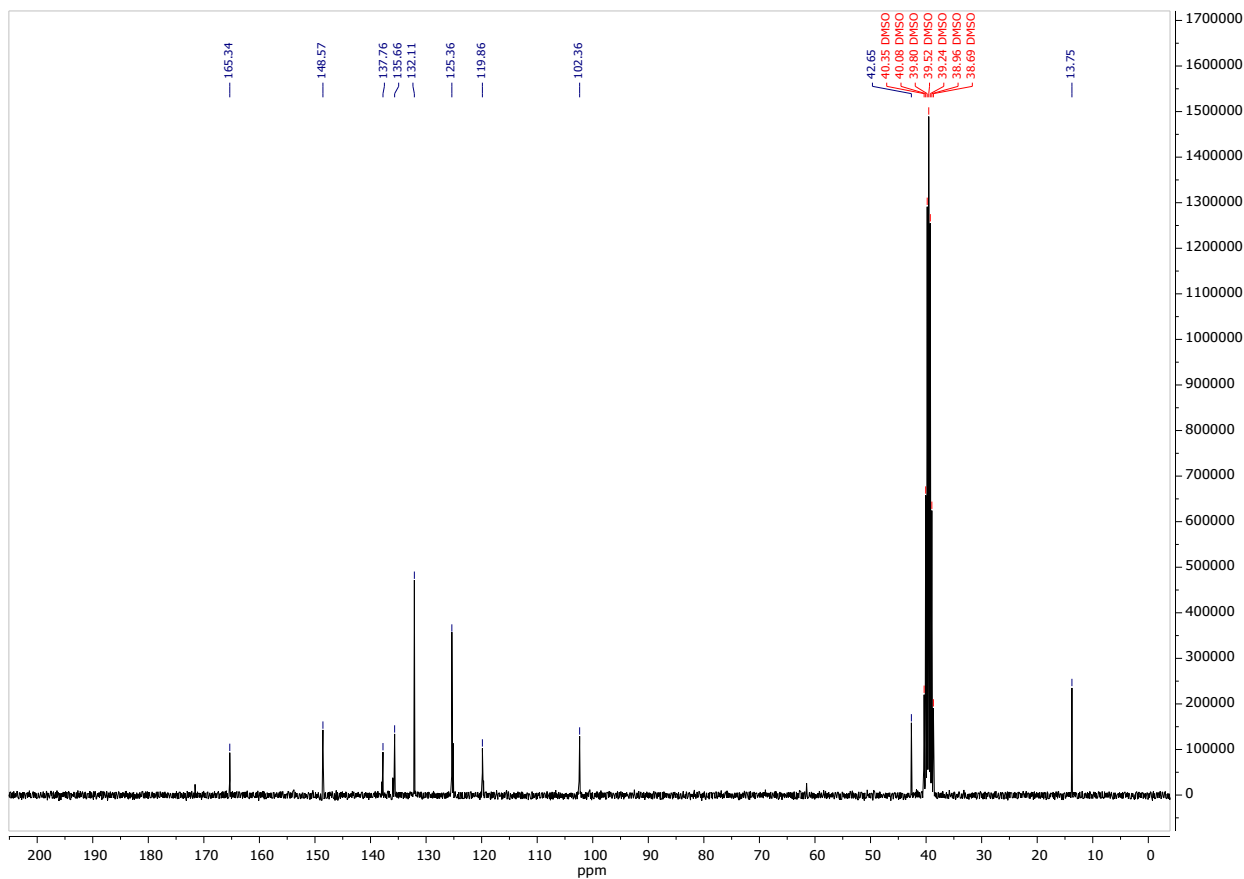

**Figure-9:** HRMS spectrum of compound **3c**

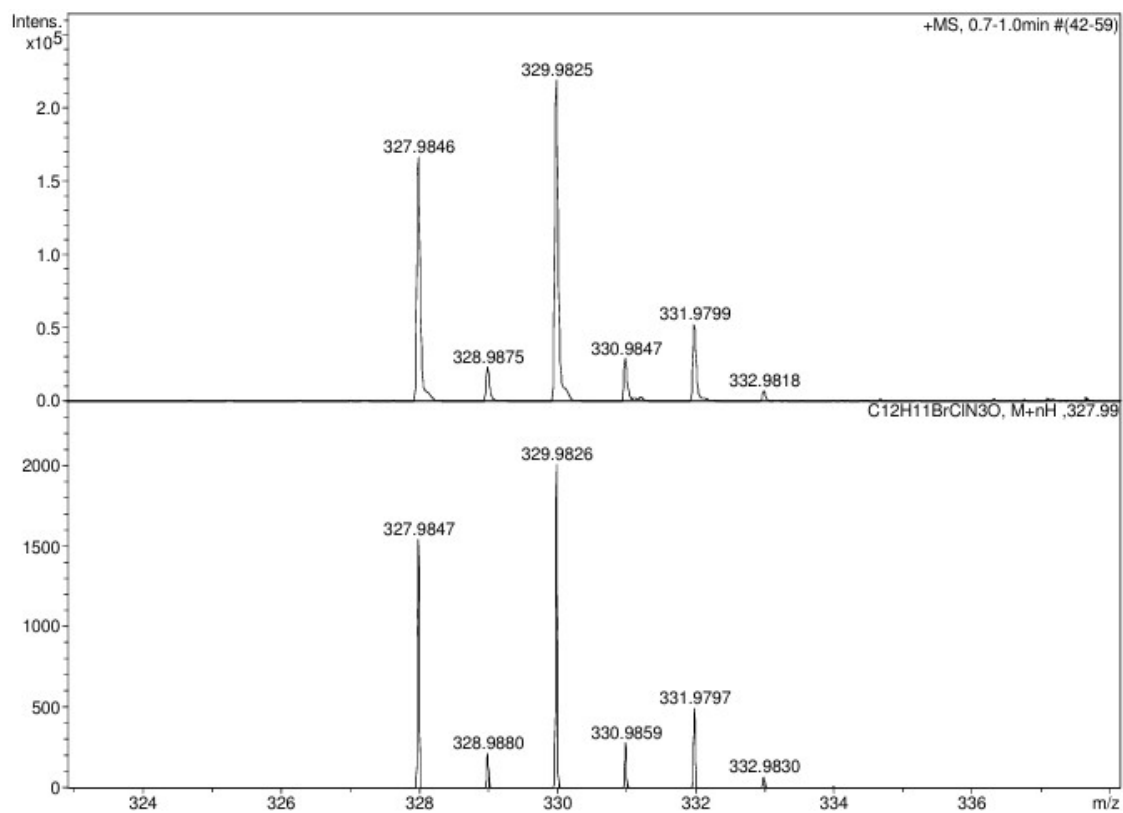

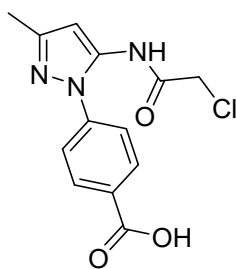

*4-(5-(2-Chloroacetamido)-3-methyl-1H-pyrazol-1-yl)benzoic acid, 3f*

White powder, m.p. 231-233°C, yield 85% (0.89 g)

$^1\text{H}$  NMR (300 MHz, DMSO- $d_6$ )  $\delta$  13.04 (brs, s, 1H), 10.39 (s, 1H), 8.03 (d,  $J = 8.6$  Hz, 2H), 7.63 (d,  $J = 8.4$  Hz, 2H), 6.30 (s, 1H), 4.27 (s, 2H), 2.23 (s, 3H).  $^{13}\text{C}\{^1\text{H}\}$  NMR (76 MHz, DMSO)  $\delta$  166.71, 165.35, 149.03, 141.96, 135.82, 130.44, 128.86, 122.64, 102.97, 42.70, 13.77. HRMS (ESI-TOF):  $m/z$   $[\text{M}+\text{H}]^+$ : calcd for  $[\text{C}_{13}\text{H}_{13}\text{ClN}_3\text{O}_3]^+$ : 294.0640; found: 294.0633.

**Figure-10:**  $^1\text{H}$  NMR spectrum (300 MHz) of **3f** in DMSO- $d_6$

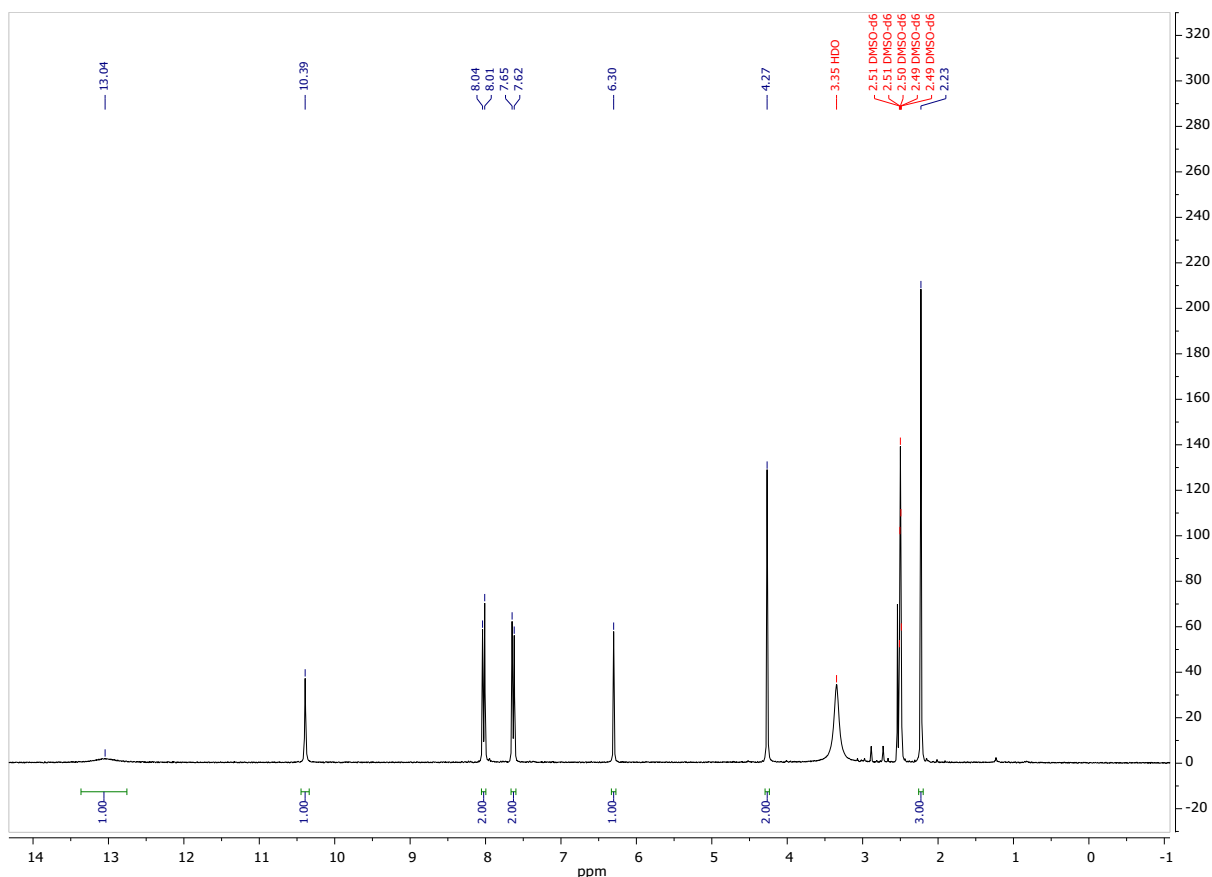

**Figure-11:**  $^{13}\text{C}$  NMR spectrum (76 MHz) of **3f** in  $\text{DMSO-}d_6$

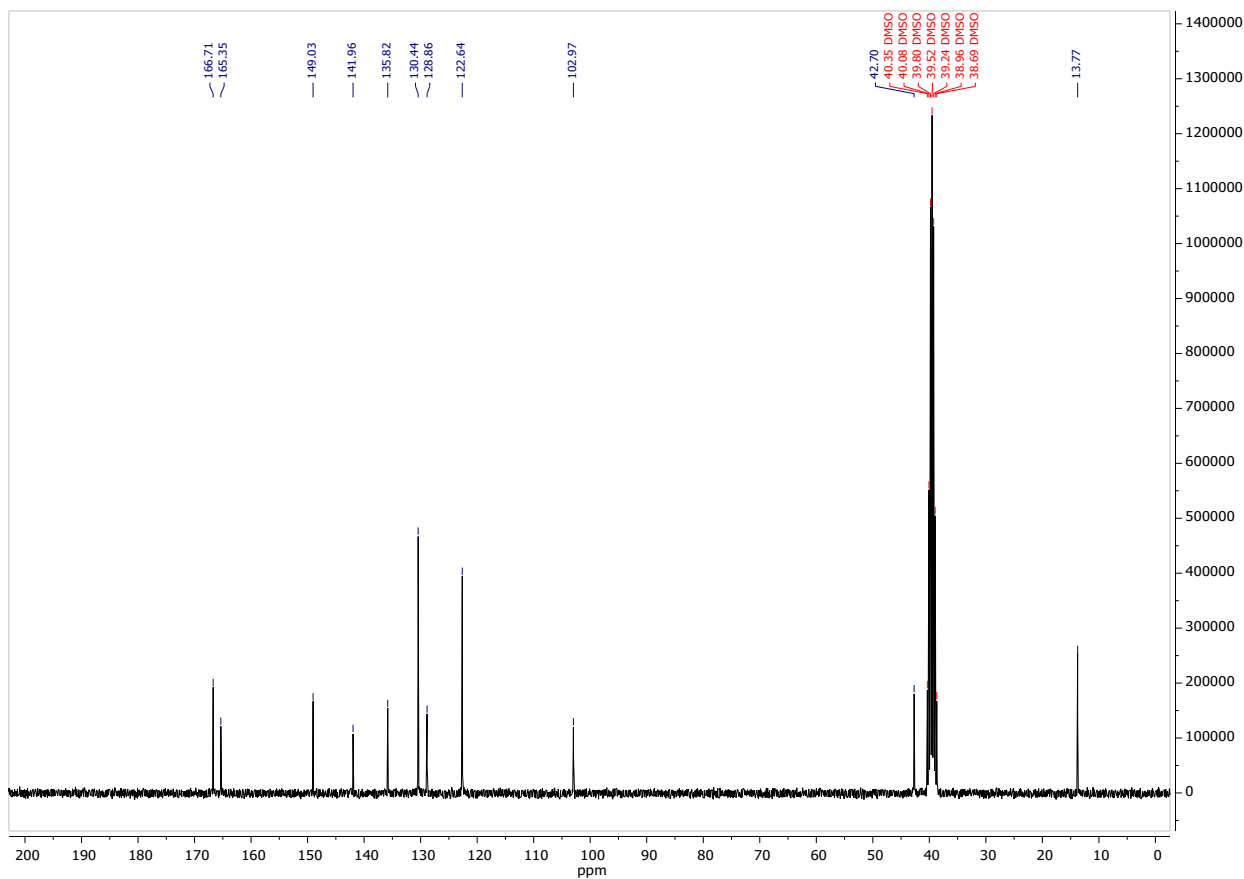

**Figure-12:** HRMS spectrum of compound **3f**

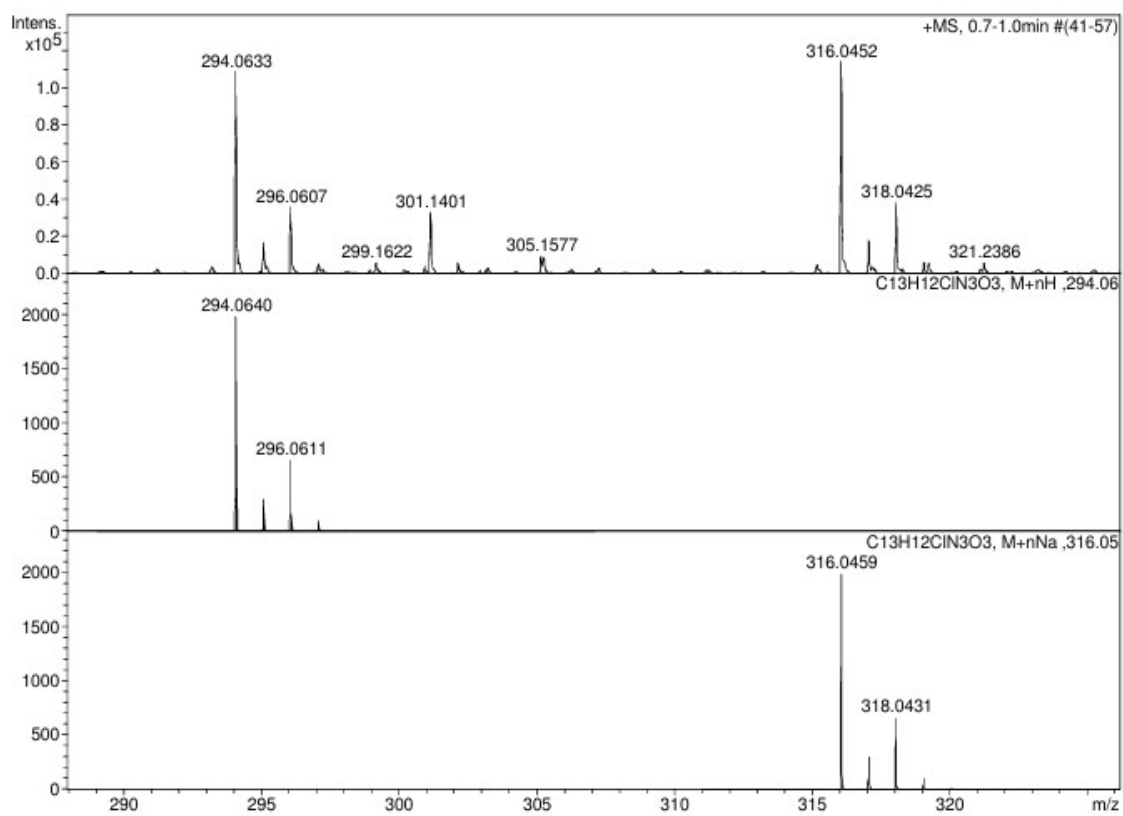

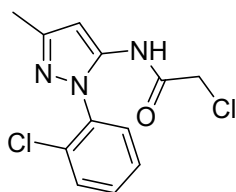

*2-Chloro-N-(1-(2-chlorophenyl)-3-methyl-1H-pyrazol-5-yl)acetamide, 3g*

White powder, m.p. 147-149°C, yield 79% (0.89 g)

$^1\text{H}$  NMR (300 MHz,  $\text{DMSO-}d_6$ )  $\delta$  10.16 (s, 1H), 7.68 – 7.63 (m, 1H), 7.57 – 7.44 (m, 3H), 6.34 (s, 1H), 4.16 (s, 2H), 2.19 (s, 3H).  $^{13}\text{C}\{^1\text{H}\}$  NMR (76 MHz,  $\text{DMSO}$ )  $\delta$  164.27, 148.36, 137.54, 135.59, 131.27, 130.82, 130.28, 130.14, 128.02, 98.45, 42.50, 13.75. HRMS (ESI-TOF):  $m/z$   $[\text{M}+\text{H}]^+$ : calcd for  $[\text{C}_{12}\text{H}_{12}\text{Cl}_2\text{N}_3\text{O}]^+$ : 284.0352; found: 284.0354.

**Figure-13:**  $^1\text{H}$  NMR spectrum (300 MHz) of **3g** in  $\text{DMSO-}d_6$

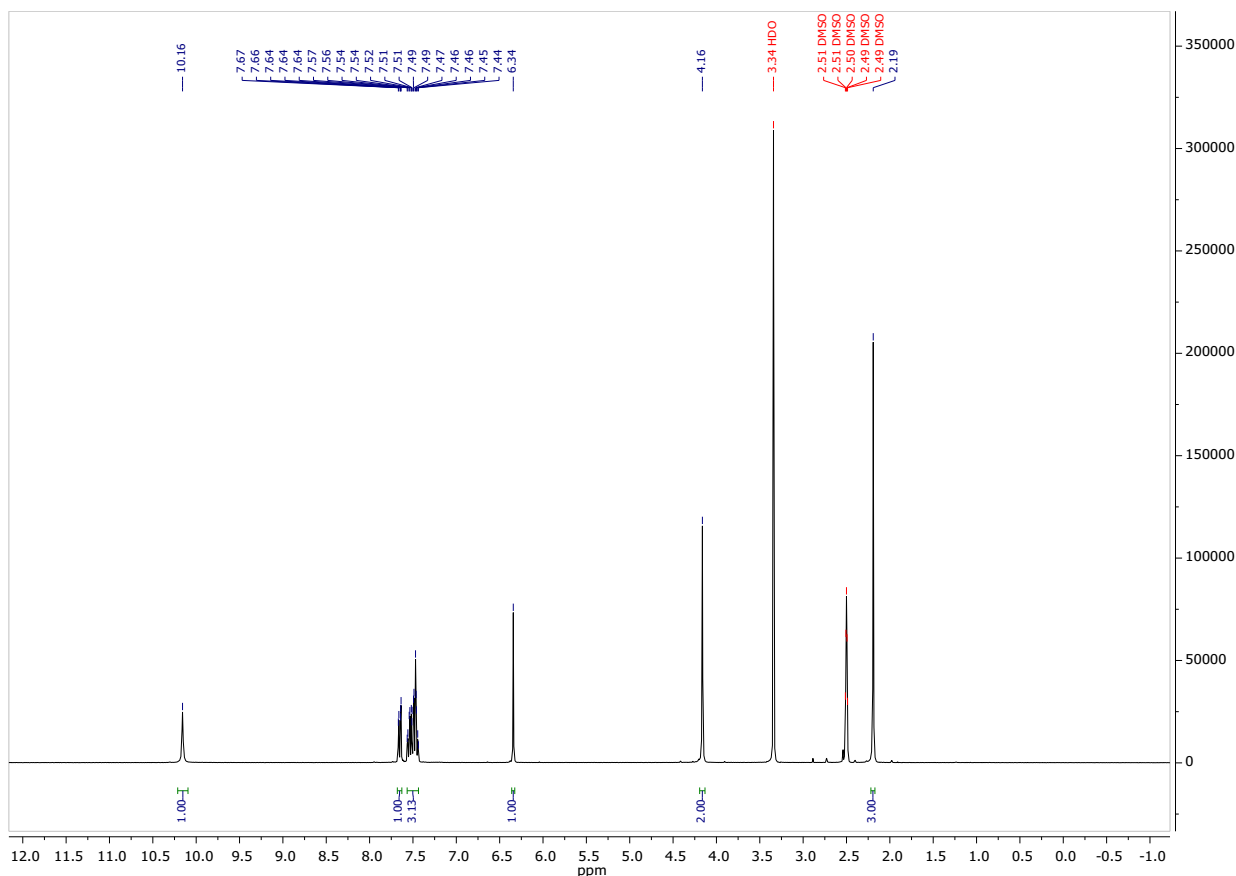

**Figure-14:**  $^{13}\text{C}$  NMR spectrum (76 MHz) of **3g** in  $\text{DMSO-}d_6$

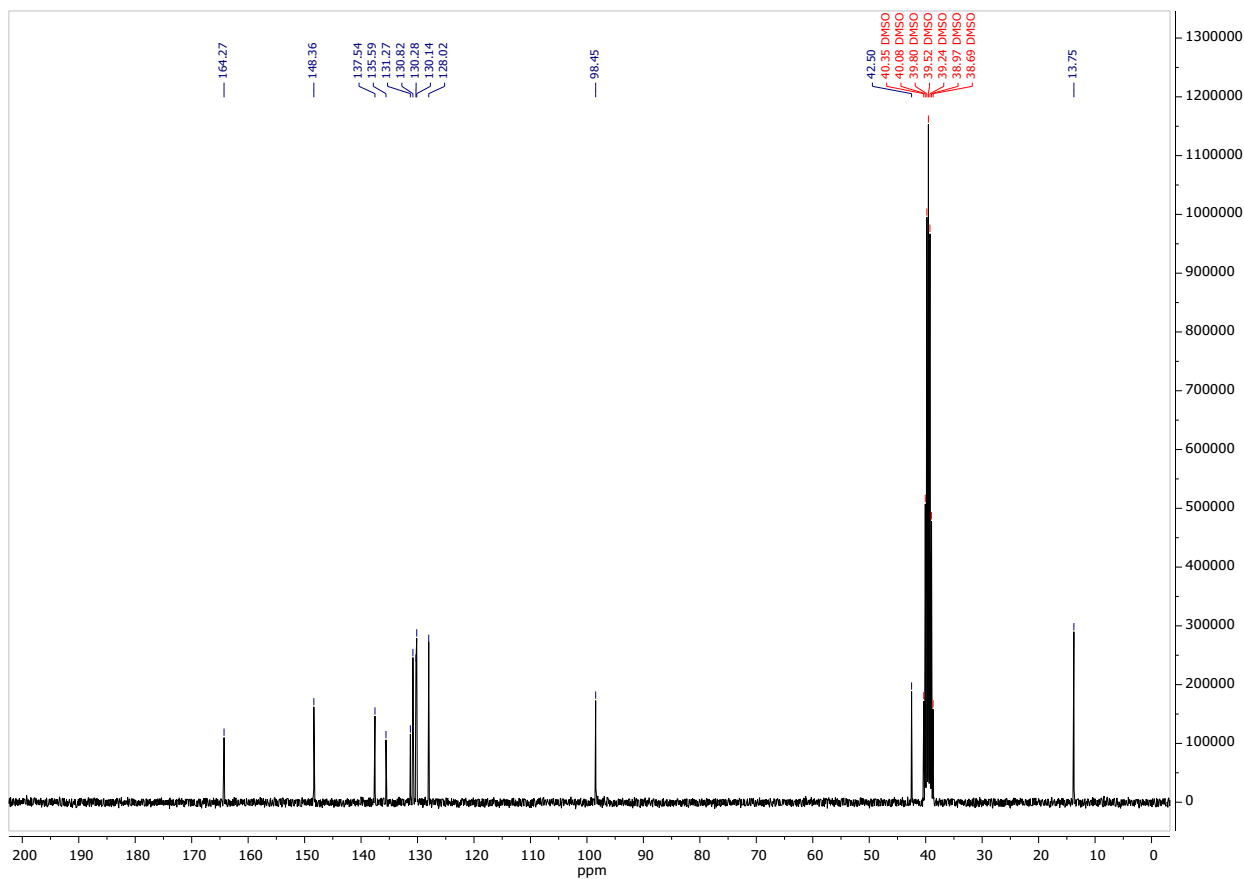

**Figure-15:** HRMS spectrum of compound **3g**

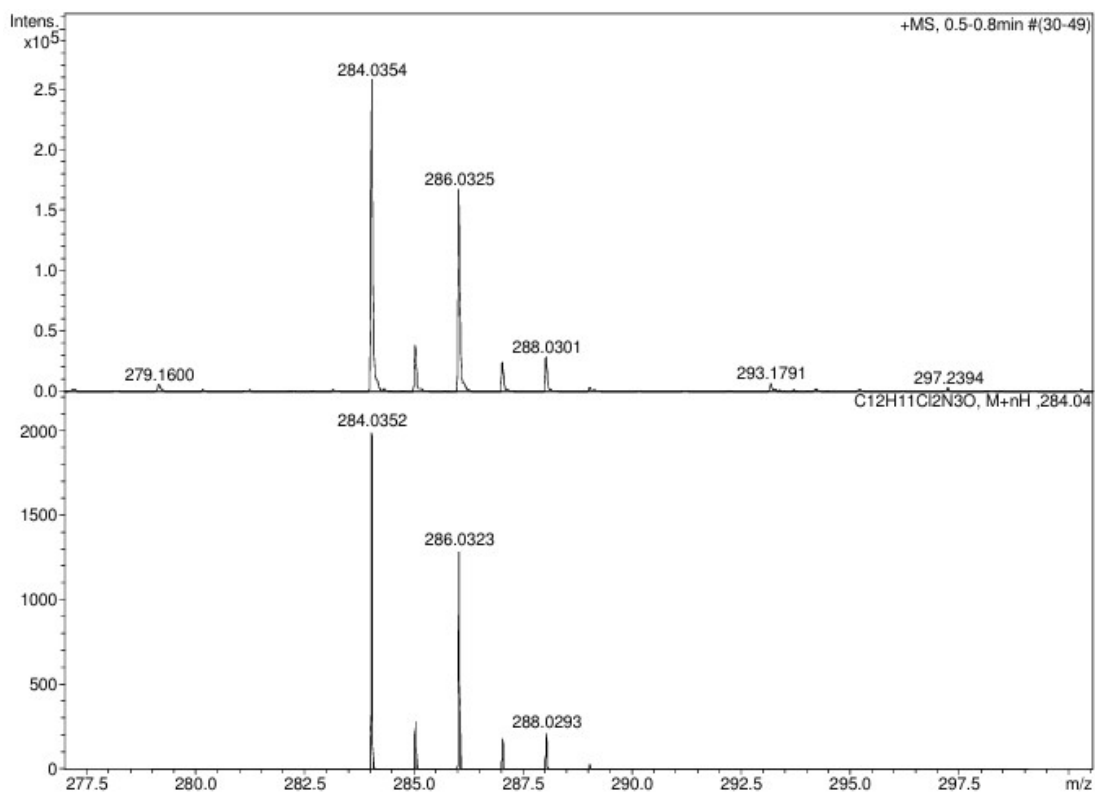

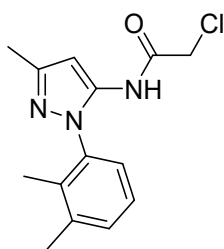

*2-Chloro-N-(1-(2,3-dimethylphenyl)-3-methyl-1H-pyrazol-5-yl)acetamide, 3h*

White powder, m.p. 177-179°C, yield 83% (0.92 g)

$^1\text{H}$  NMR (300 MHz, DMSO- $d_6$ )  $\delta$  9.93 (s, 1H), 7.30 (d,  $J = 7.4$  Hz, 1H), 7.23 – 7.17 (m, 1H), 7.03 (d,  $J = 7.7$  Hz, 1H), 6.30 (s, 1H), 4.15 (s, 2H), 2.30 (s, 3H), 2.19 (s, 3H), 1.85 (s, 3H).  $^{13}\text{C}\{^1\text{H}\}$  NMR (76 MHz, DMSO)  $\delta$  164.52, 147.39, 137.89, 137.11, 136.94, 134.52, 130.36, 125.81, 125.52, 98.46, 42.55, 19.90, 13.93, 13.76. HRMS (ESI-TOF):  $m/z$   $[\text{M}+\text{H}]^+$ : calcd for  $[\text{C}_{14}\text{H}_{17}\text{ClN}_3\text{O}]^+$ : 278.1055; found: 278.1055.

**Figure-16:**  $^1\text{H}$  NMR spectrum (300 MHz) of **3h** in DMSO- $d_6$

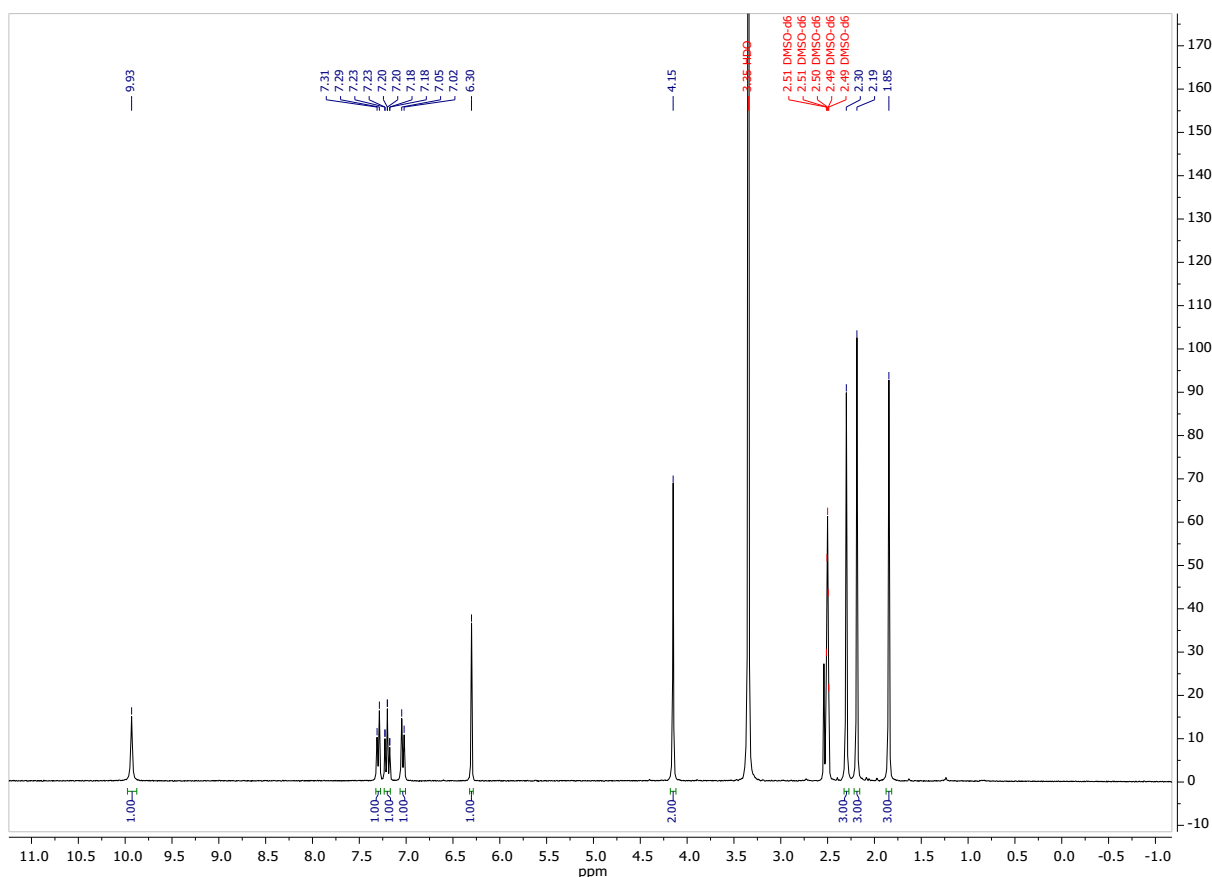

**Figure-17:**  $^{13}\text{C}$  NMR spectrum (76 MHz) of **3h** in  $\text{DMSO-}d_6$

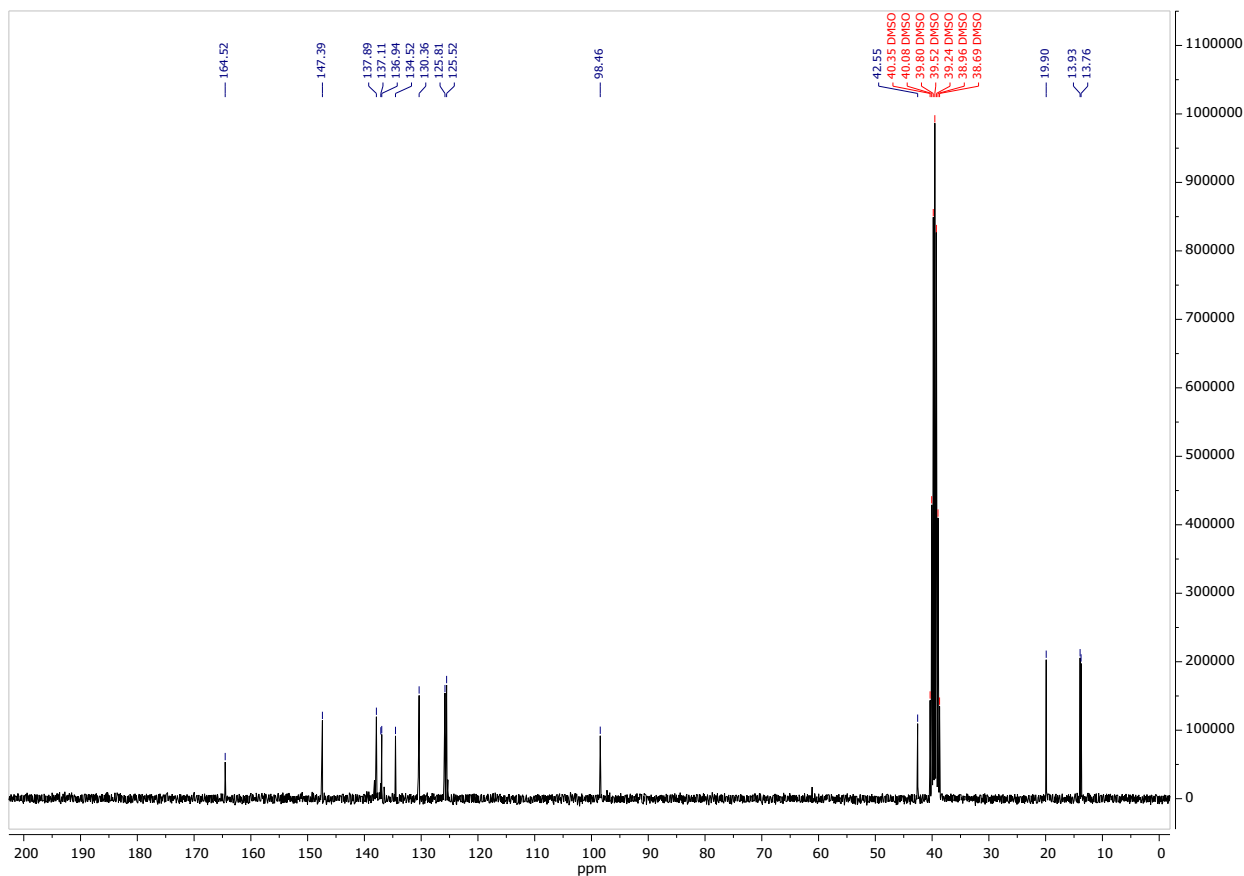

**Figure-18:** HRMS spectrum of compound **3h**

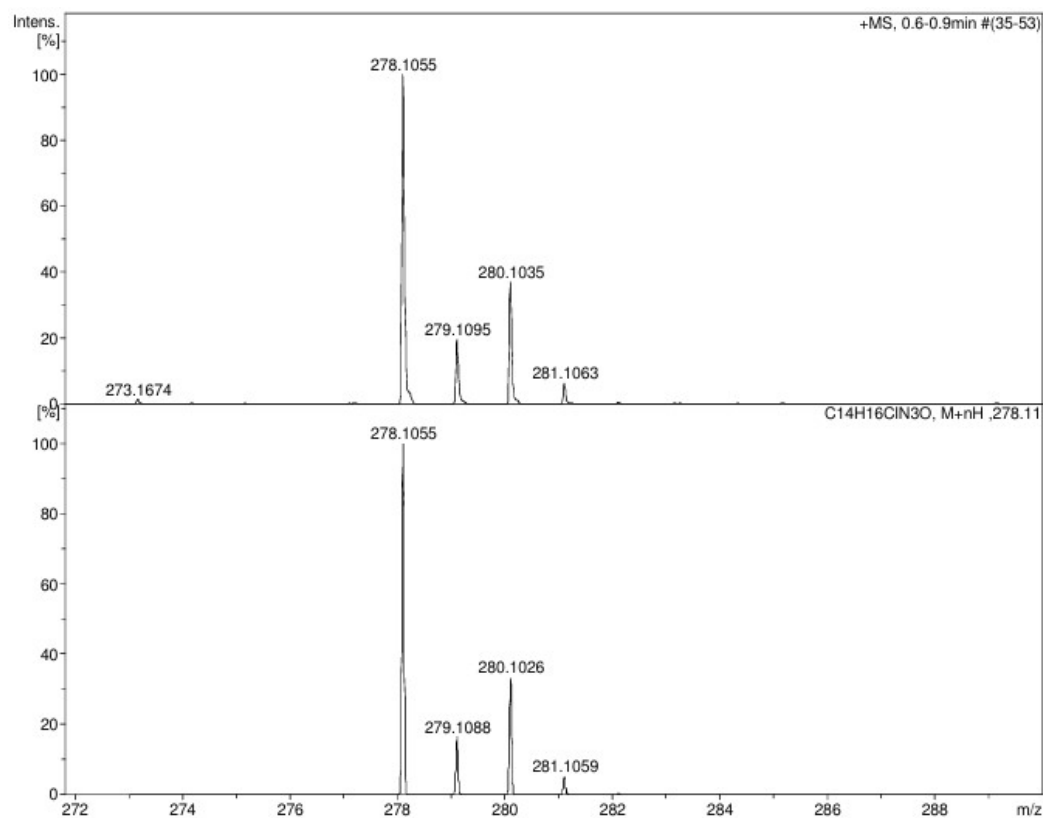

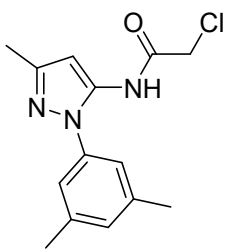

*2-Chloro-N-(1-(3,5-dimethylphenyl)-3-methyl-1H-pyrazol-5-yl)acetamide, 3i*

Grey powder, m.p. 124-126°C, yield 92% (1.1 g)

$^1\text{H}$  NMR (300 MHz, DMSO- $d_6$ )  $\delta$  10.21 (s, 1H), 7.09 (s, 2H), 7.01 (s, 1H), 6.24 (s, 1H), 4.22 (s, 2H), 2.31 (s, 6H), 2.20 (s, 3H).  $^{13}\text{C}$  { $^1\text{H}$ } NMR (76 MHz, DMSO)  $\delta$  165.17, 147.72, 138.39, 138.27, 135.27, 128.49, 121.05, 101.92, 42.60, 20.82, 13.71. HRMS (ESI-TOF): m/z [ $\text{M}+\text{H}$ ] $^+$ : calcd for [ $\text{C}_{14}\text{H}_{17}\text{ClN}_3\text{O}$ ] $^+$ : 278.1055; found: 278.1055.

**Figure-19:**  $^1\text{H}$  NMR spectrum (300 MHz) of **3i** in DMSO- $d_6$

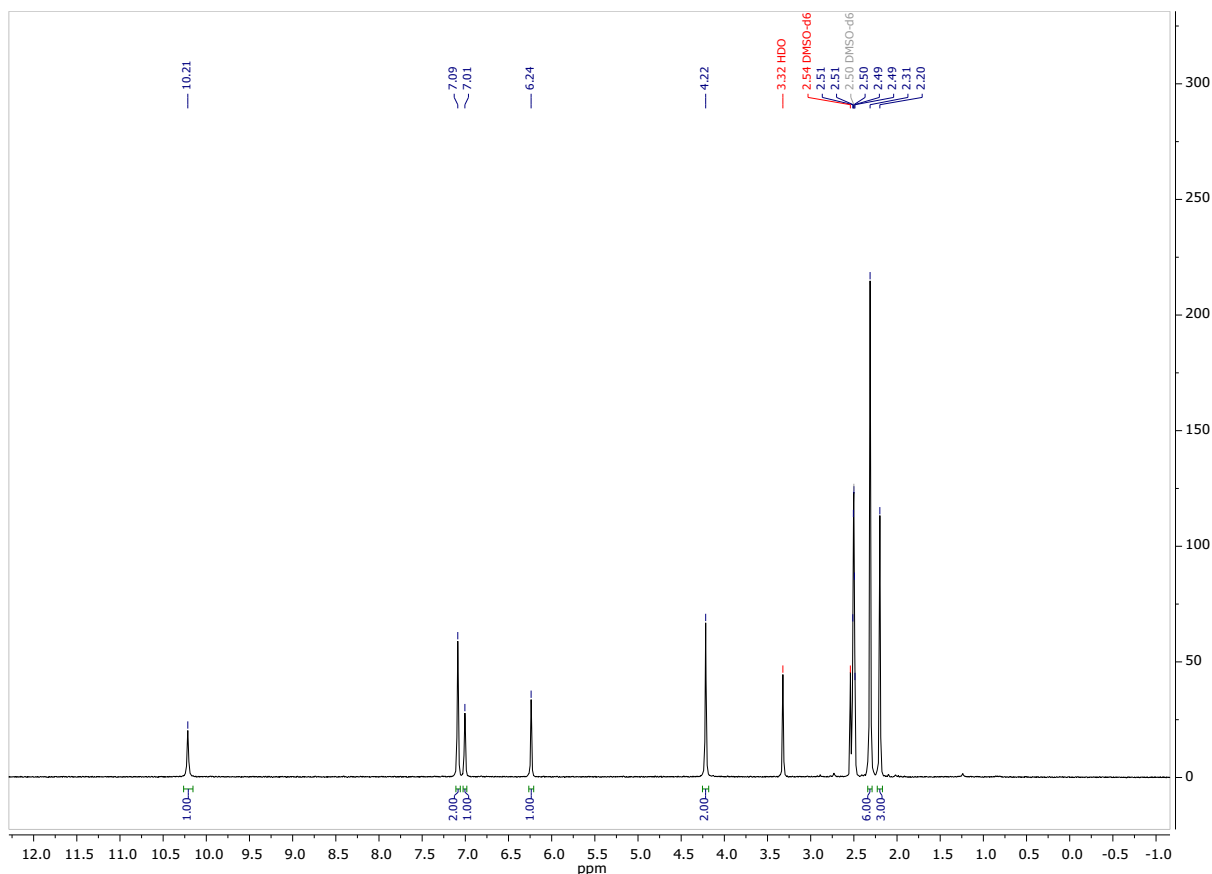

**Figure-20:**  $^{13}\text{C}$  NMR spectrum (76 MHz) of **3i** in  $\text{DMSO-}d_6$

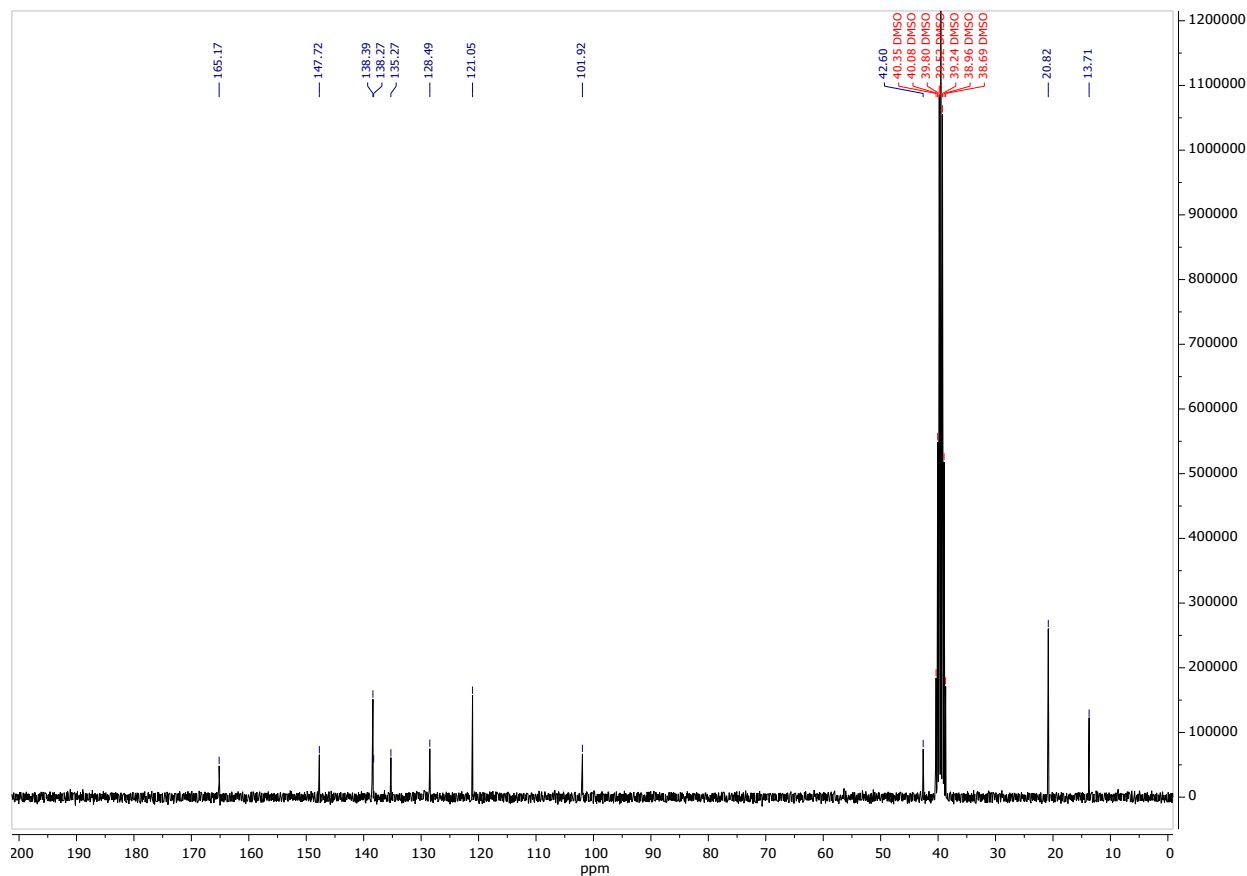

**Figure-21:** HRMS spectrum of compound **3i**

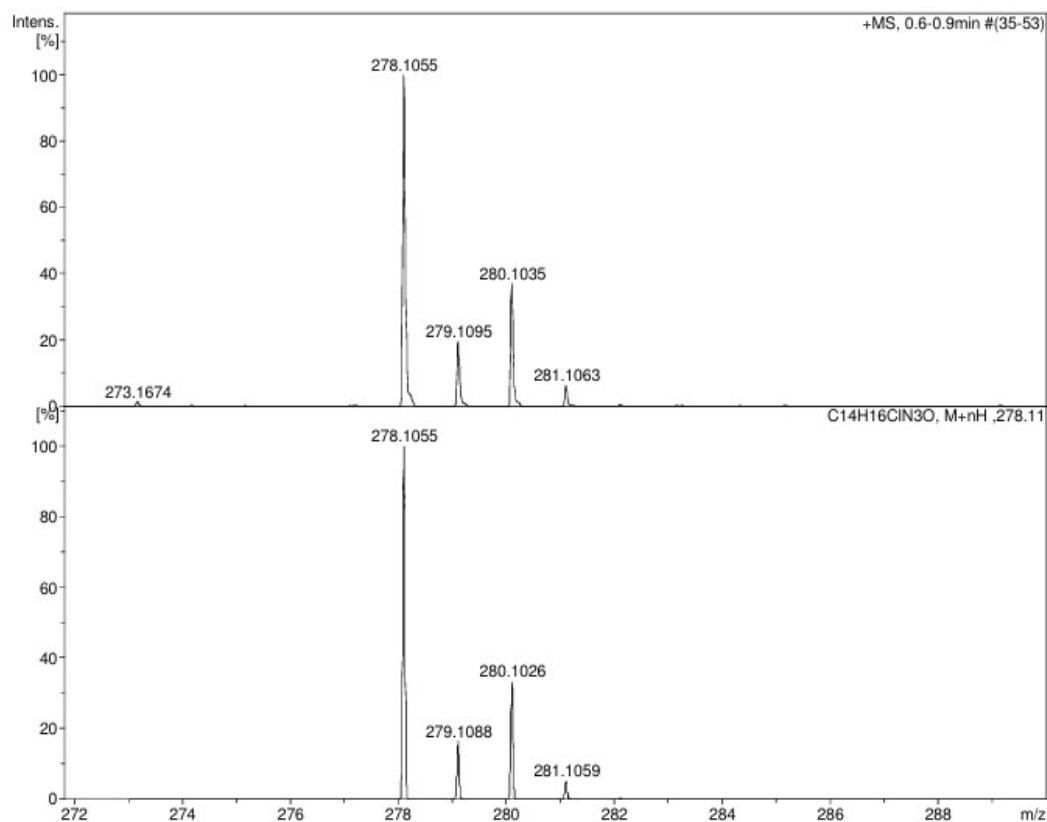

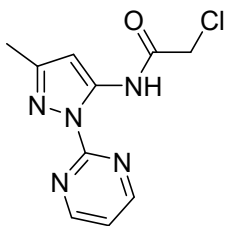

*2-chloro-N-(3-methyl-1-(pyrimidin-2-yl)-1H-pyrazol-5-yl)acetamide, 3k*

White powder, m.p. 202-204°C, yield 82% (0.82 g)

$^1\text{H}$  NMR (300 MHz,  $\text{DMSO-}d_6$ )  $\delta$  12.28 (s, 1H), 8.89 (d,  $J = 4.9$  Hz, 2H), 7.46 (t,  $J = 4.9$  Hz, 1H), 6.69 (s, 1H), 4.53 (s, 2H), 2.24 (s, 3H). HRMS (ESI-TOF):  $m/z$   $[\text{M}+\text{H}]^+$ : calcd for  $[\text{C}_{10}\text{H}_{11}\text{ClN}_5\text{O}]^+$ : 252.0647; found: 252.0648.

**Figure-22:**  $^1\text{H}$  NMR spectrum (300 MHz) of **3k** in  $\text{DMSO-}d_6$

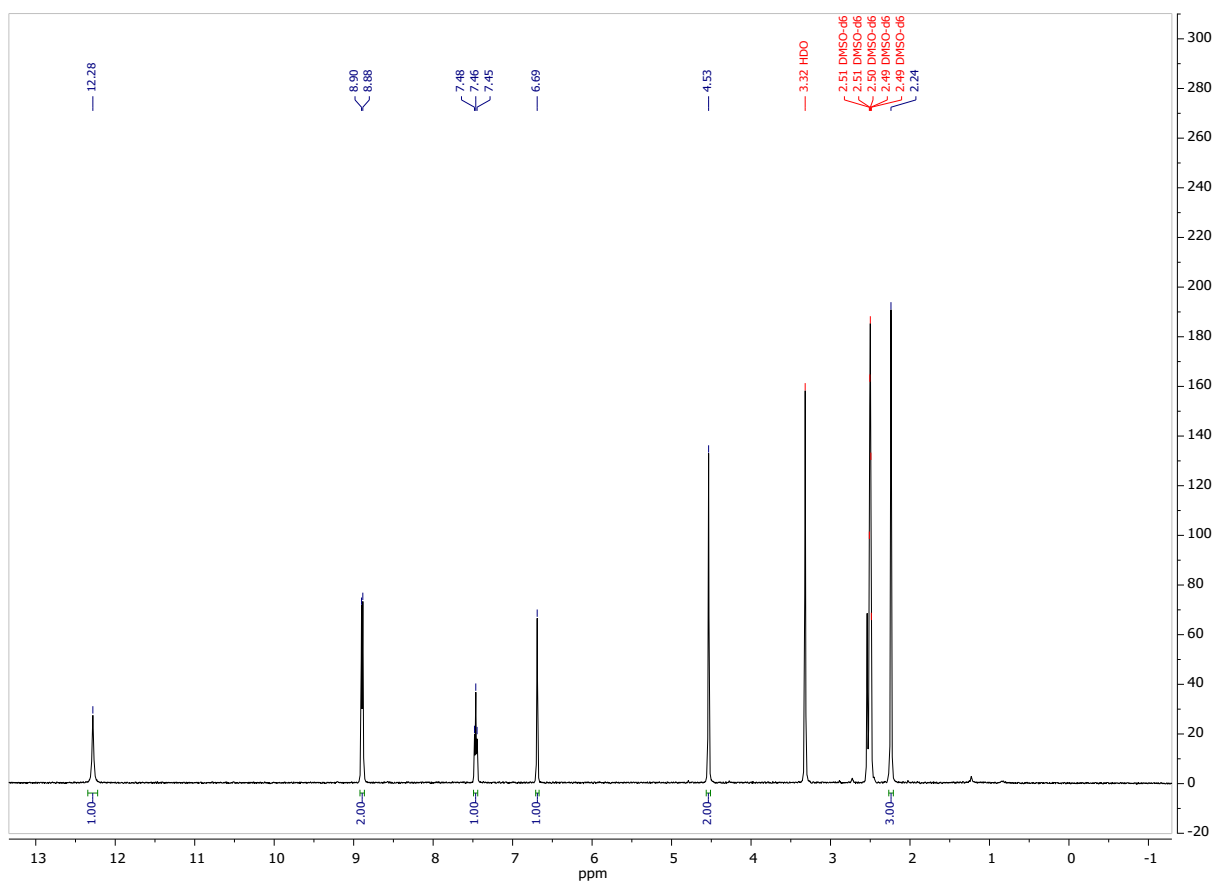

**Figure-23:** HRMS spectrum of compound **3k**

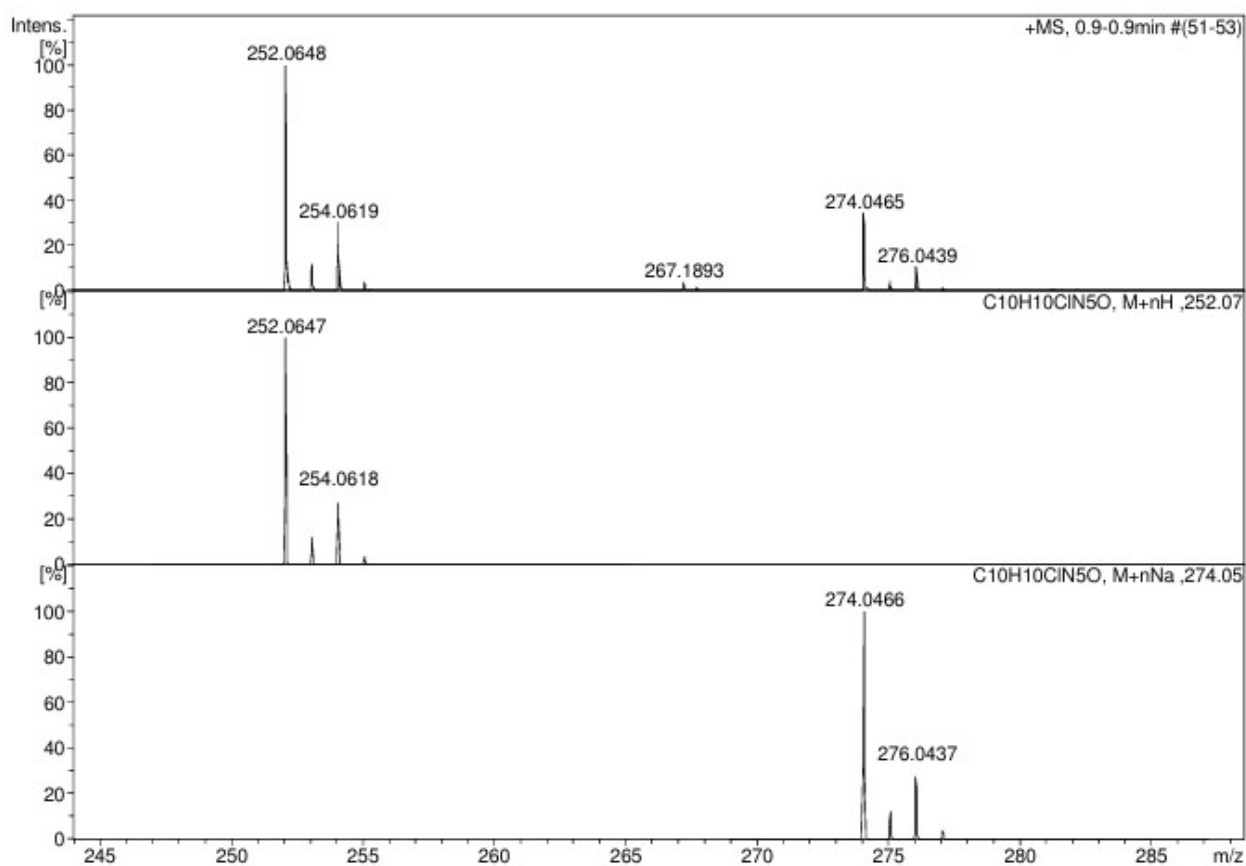

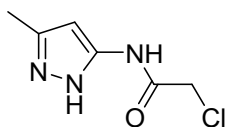

*2-Chloro-N-(3-methyl-1H-pyrazol-5-yl)acetamide, 31*

White powder, m.p. 184-186°C, yield 53% (0.18g)

$^1\text{H}$  NMR (300 MHz,  $\text{DMSO-}d_6$ )  $\delta$  12.07 (s, 1H), 10.60 (s, 1H), 6.26 (s, 1H), 4.20 (s, 2H), 2.19 (s, 3H).  $^{13}\text{C}$   $\{^1\text{H}\}$  NMR (76 MHz,  $\text{DMSO}$ )  $\delta$  163.91, 146.13, 139.42, 95.63, 43.03, 10.80. HRMS (ESI-TOF):  $m/z$   $[\text{M}+\text{H}]^+$ : calcd for  $[\text{C}_6\text{H}_9\text{ClN}_3\text{O}]^+$ : 174.0429; found: 174.0423.

**Figure-24:**  $^1\text{H}$  NMR spectrum (300 MHz) of **31** in  $\text{DMSO-}d_6$

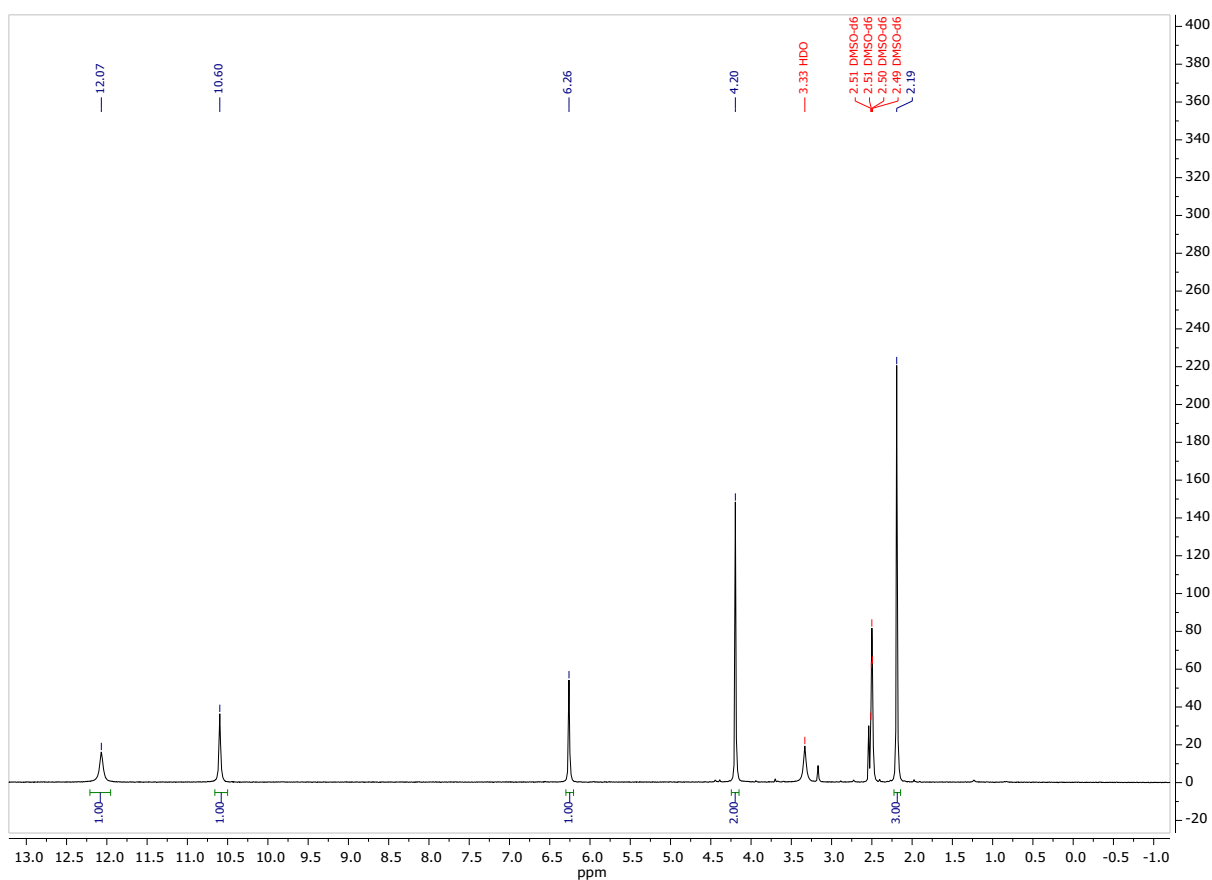

**Figure-25:**  $^{13}\text{C}$  NMR spectrum (76 MHz) of **31** in  $\text{DMSO-}d_6$

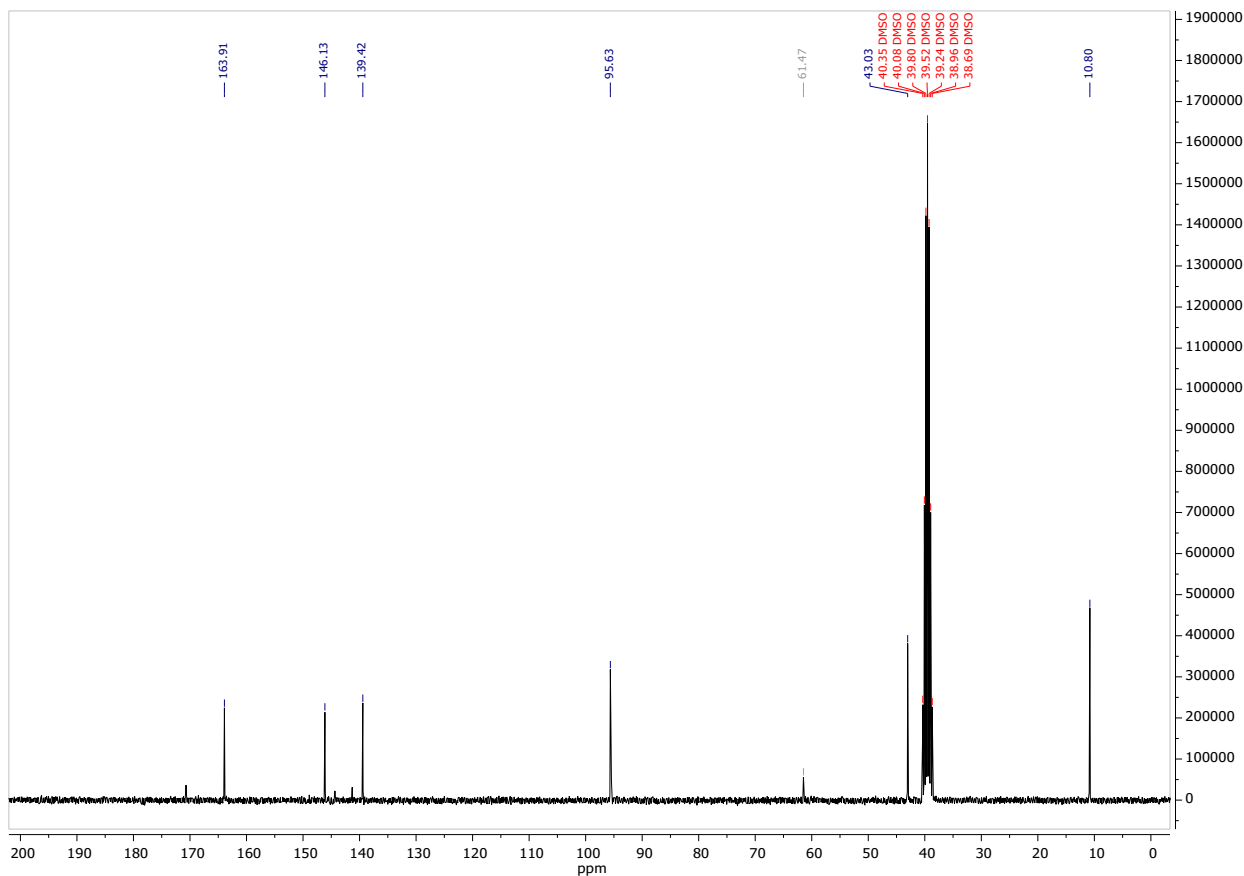

**Figure-26:** HRMS spectrum of compound **31**

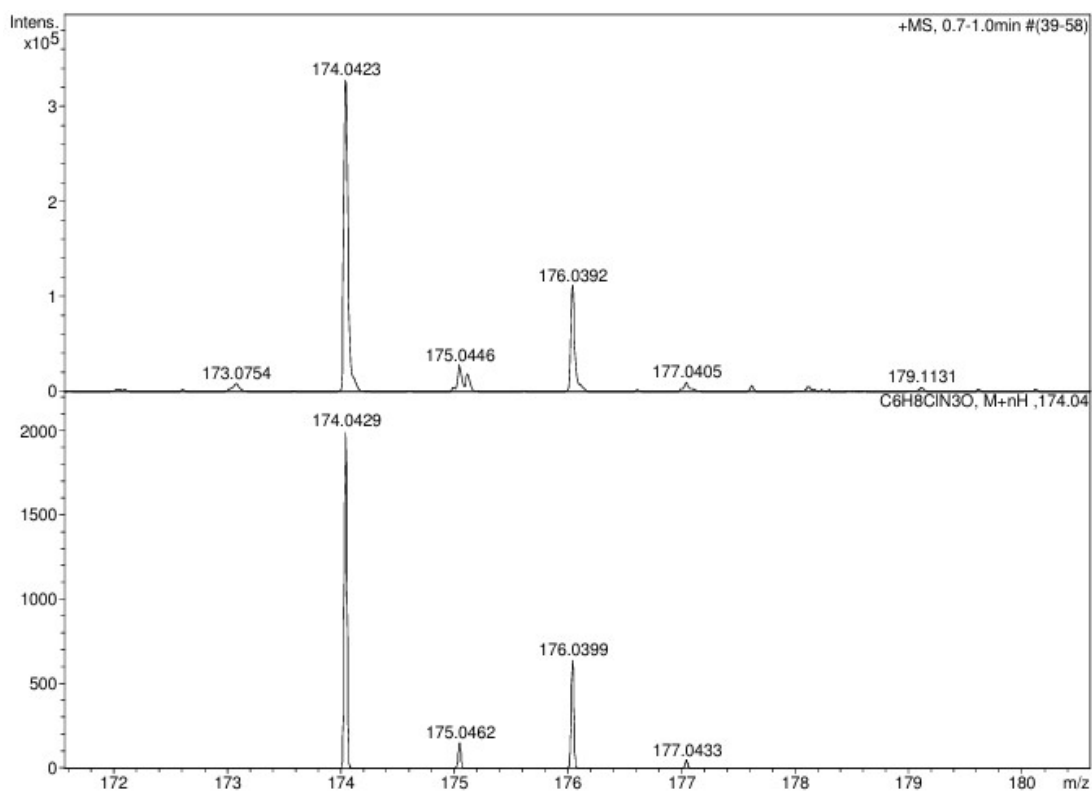

## NMR and HRMS spectra for compounds 4

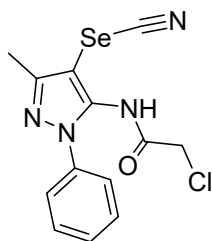

*2-Chloro-N-(3-methyl-1-phenyl-4-selenocyanato-1H-pyrazol-5-yl)acetamide, 4a*

Grey powder, m.p. 172-174°C, yield 85% (0.60 g)

$^1\text{H}$  NMR (300 MHz, DMSO- $d_6$ )  $\delta$  10.75 (s, 1H), 7.56 – 7.48 (m, 4H), 7.46 – 7.40 (m, 1H), 4.31 (s, 2H), 2.35 (s, 3H).  $^{77}\text{Se}$  NMR (57 MHz, DMSO)  $\delta$  160.07.  $^{13}\text{C}\{^1\text{H}\}$  NMR (76 MHz, DMSO)  $\delta$  166.36, 150.78, 138.00, 137.91, 129.36, 128.11, 123.39, 103.32, 94.62, 42.29, 13.10. HRMS (ESI-TOF):  $m/z$   $[\text{M}+\text{H}]^+$ : calcd for  $[\text{C}_{13}\text{H}_{12}\text{ClN}_4\text{OSe}]^+$ : 354.9857; found: 354.9859.

**Figure-27:**  $^1\text{H}$  NMR spectrum (300 MHz) of **4a** in DMSO- $d_6$

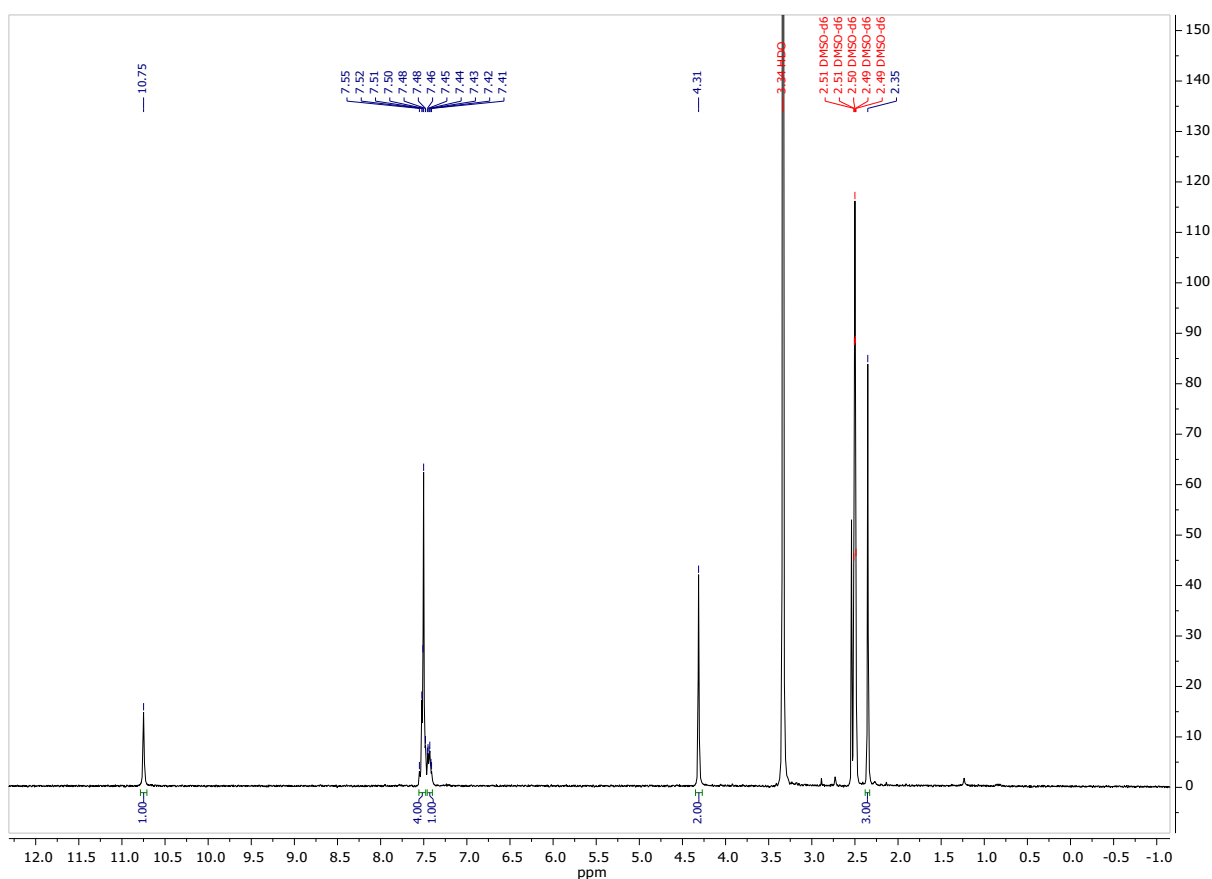

**Figure-28:**  $^{77}\text{Se}$  NMR spectrum (57 MHz) of **4a** in  $\text{DMSO-}d_6$

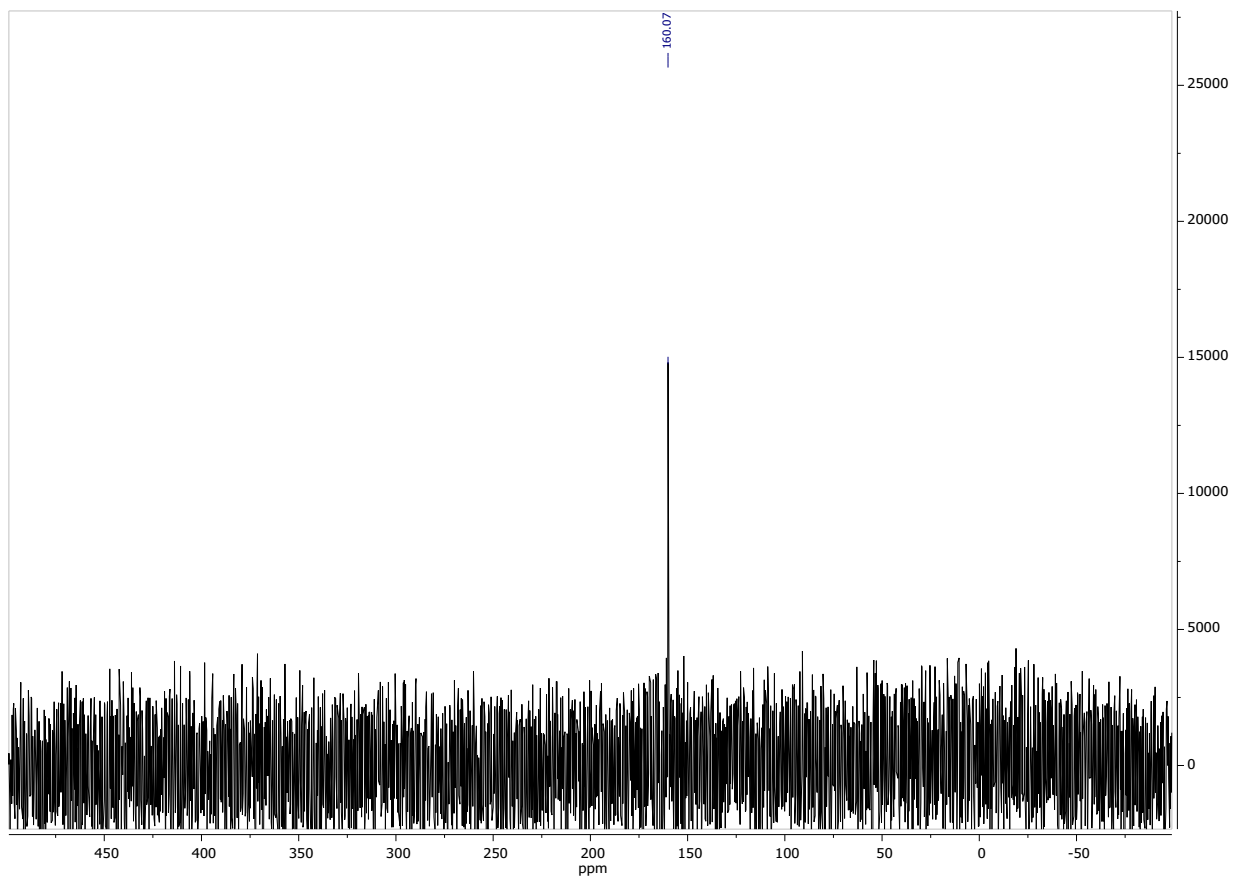

**Figure-29:**  $^{13}\text{C}$  NMR spectrum (76 MHz) of **4a** in  $\text{DMSO-}d_6$

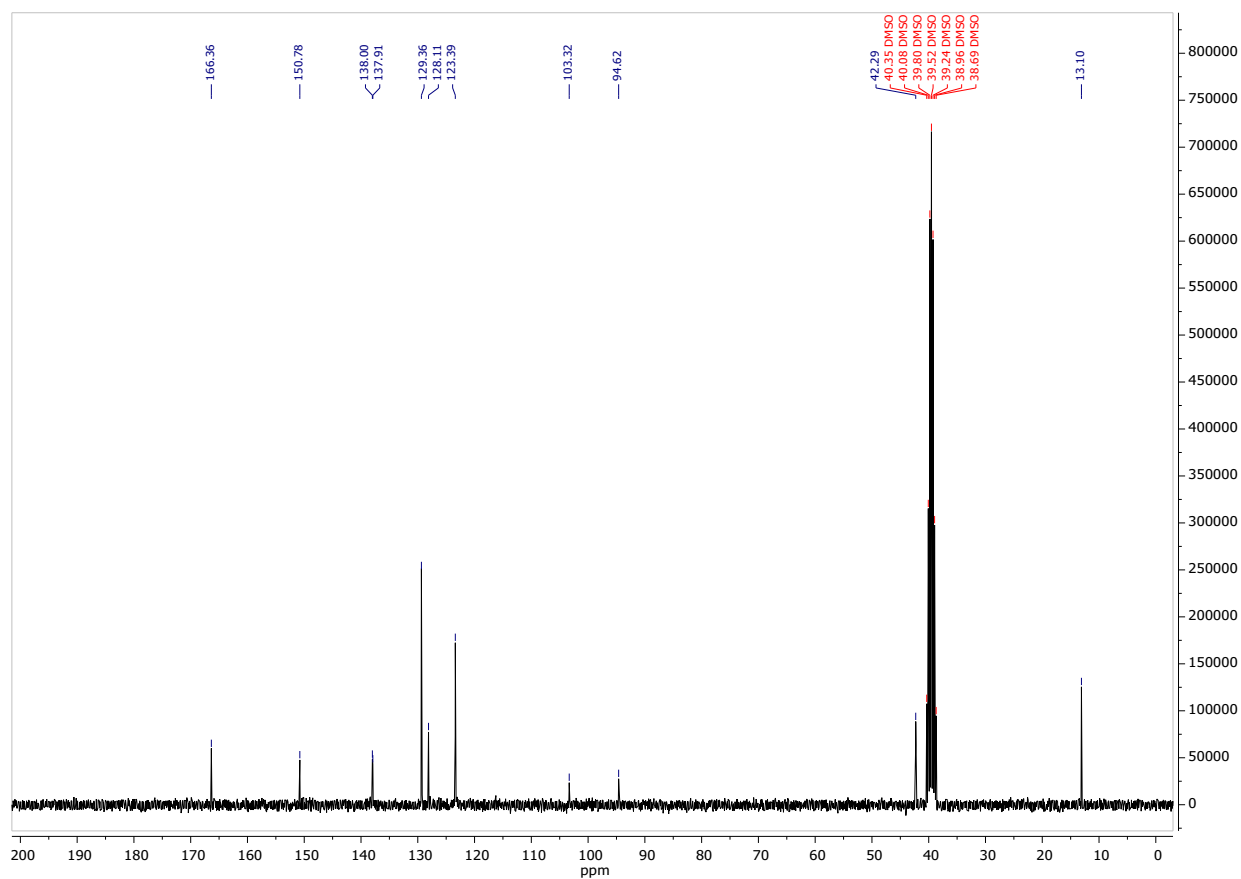

**Figure-30:** HRMS spectrum of compound **4a**

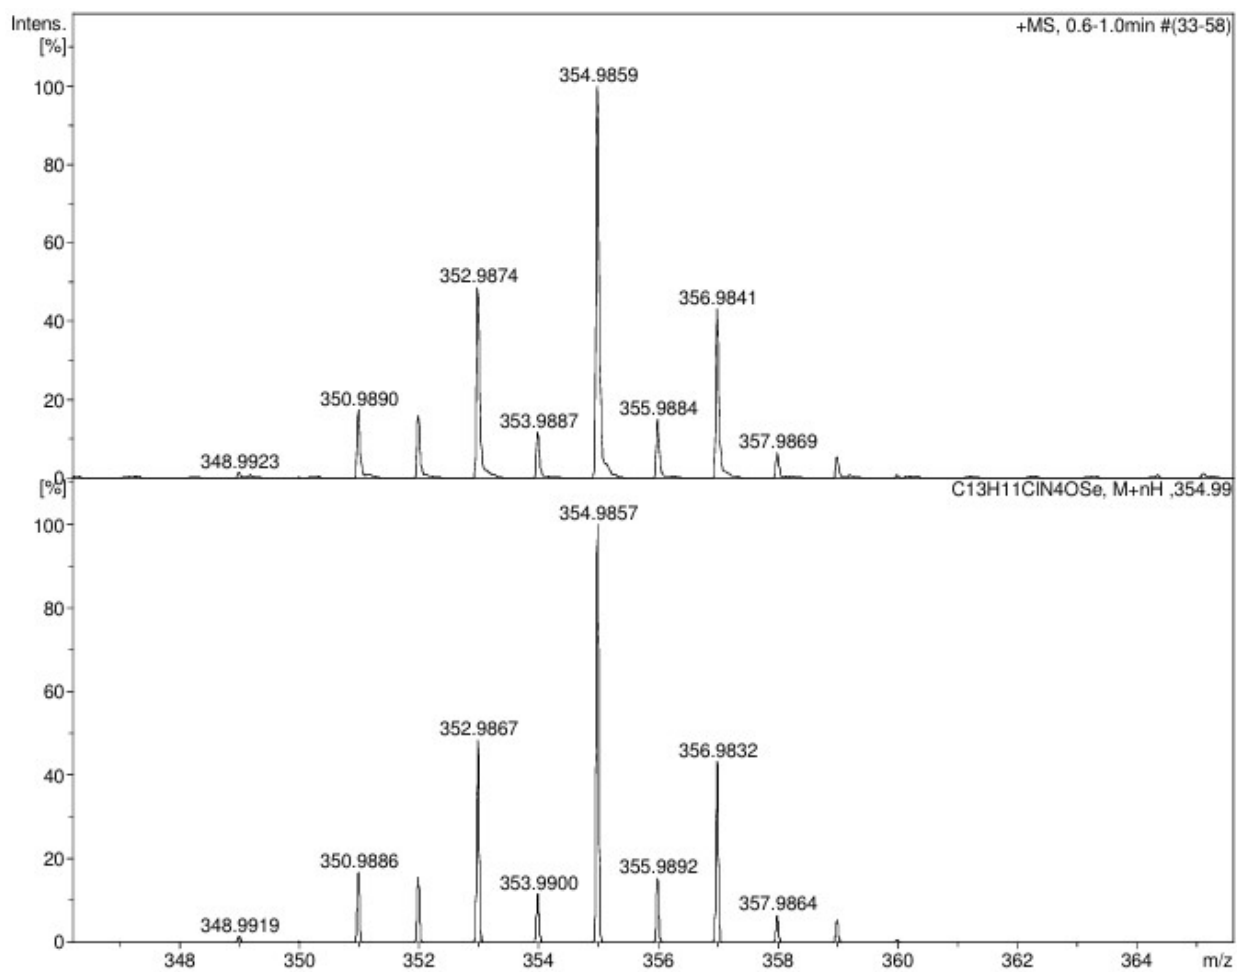

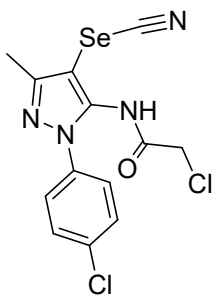

*2-Chloro-N-(1-(4-chlorophenyl)-3-methyl-4-selenocyanato-1H-pyrazol-5-yl)acetamide, 4b*

White powder, m.p. 191-193°C, yield 83% (0.64 g)

$^1\text{H}$  NMR (300 MHz, DMSO- $d_6$ )  $\delta$  10.77 (s, 1H), 7.61 – 7.51 (m, 4H), 4.33 (s, 2H), 2.35 (s, 3H).  $^{77}\text{Se}$  NMR (57 MHz, DMSO)  $\delta$  161.08.  $^{13}\text{C}\{^1\text{H}\}$  NMR (76 MHz, DMSO)  $\delta$  166.29, 151.07, 138.06, 136.84, 132.41, 129.34, 125.02, 103.33, 94.88, 42.31, 13.08. HRMS (ESI-TOF):  $m/z$   $[\text{M}+\text{H}]^+$ : calcd for  $[\text{C}_{13}\text{H}_{11}\text{Cl}_2\text{N}_4\text{OSe}]^+$ : 388.9465; found: 388.9473.

**Figure-31:**  $^1\text{H}$  NMR spectrum (300 MHz) of **4b** in DMSO- $d_6$

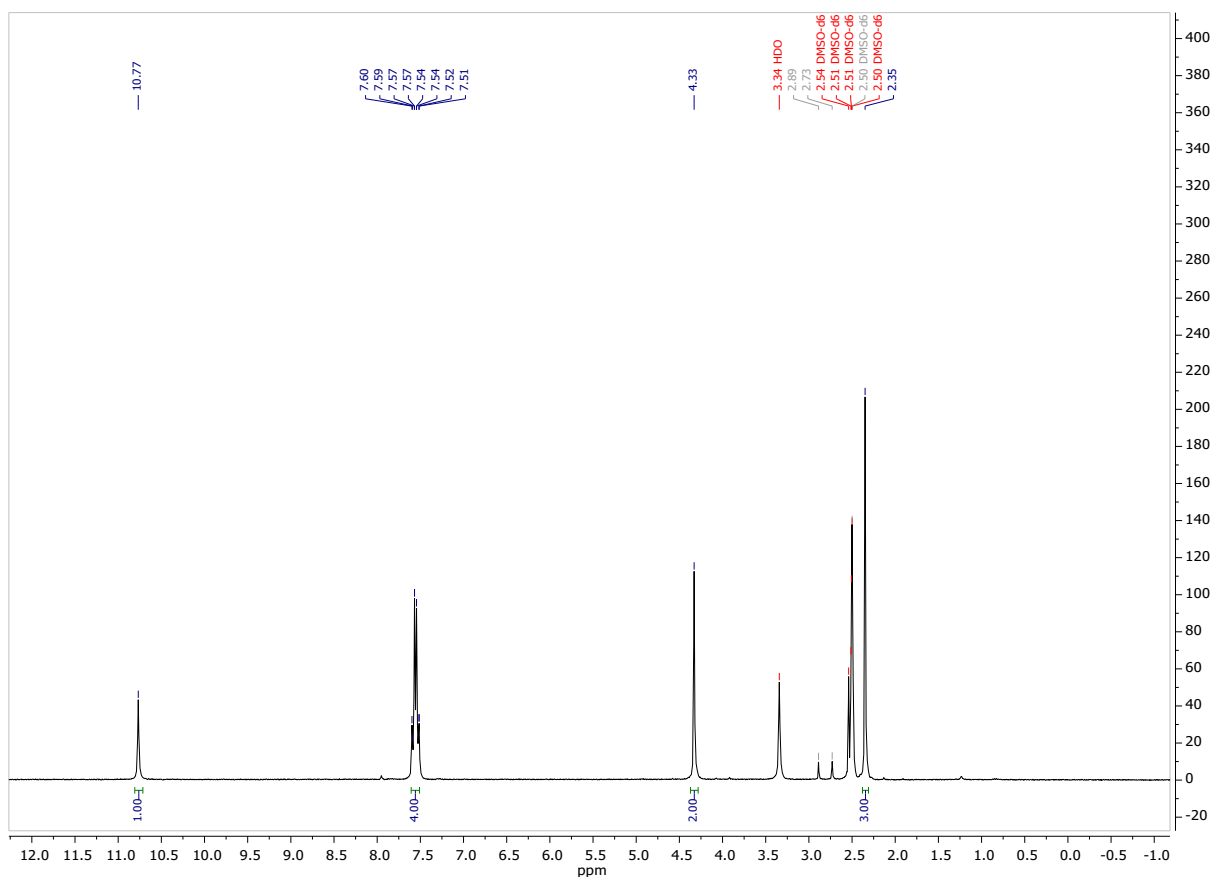

**Figure-32:**  $^{77}\text{Se}$  NMR spectrum (57 MHz) of **4b** in  $\text{DMSO-}d_6$

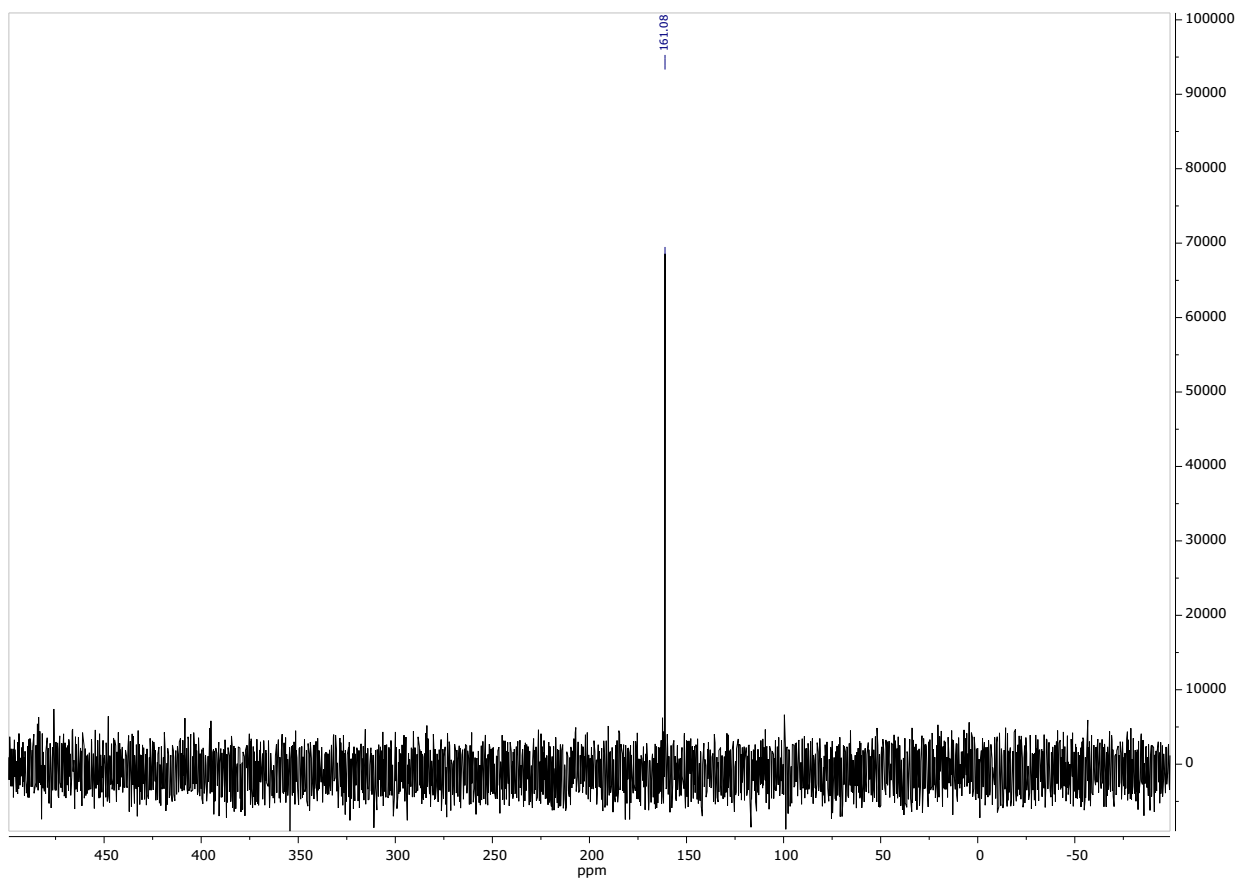

**Figure-33:**  $^{13}\text{C}$  NMR spectrum (76 MHz) of **4b** in  $\text{DMSO-}d_6$

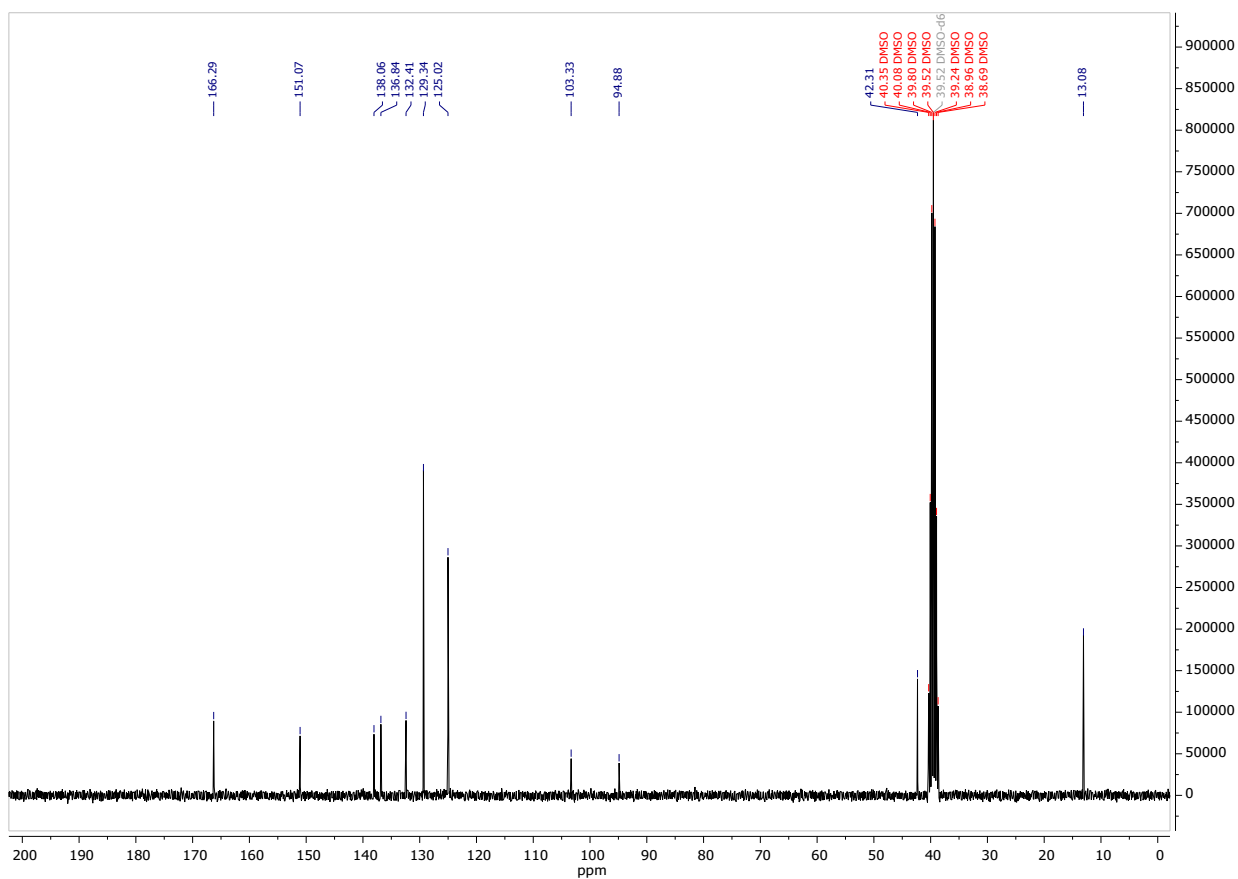

**Figure-34:** HRMS spectrum of compound **4b**

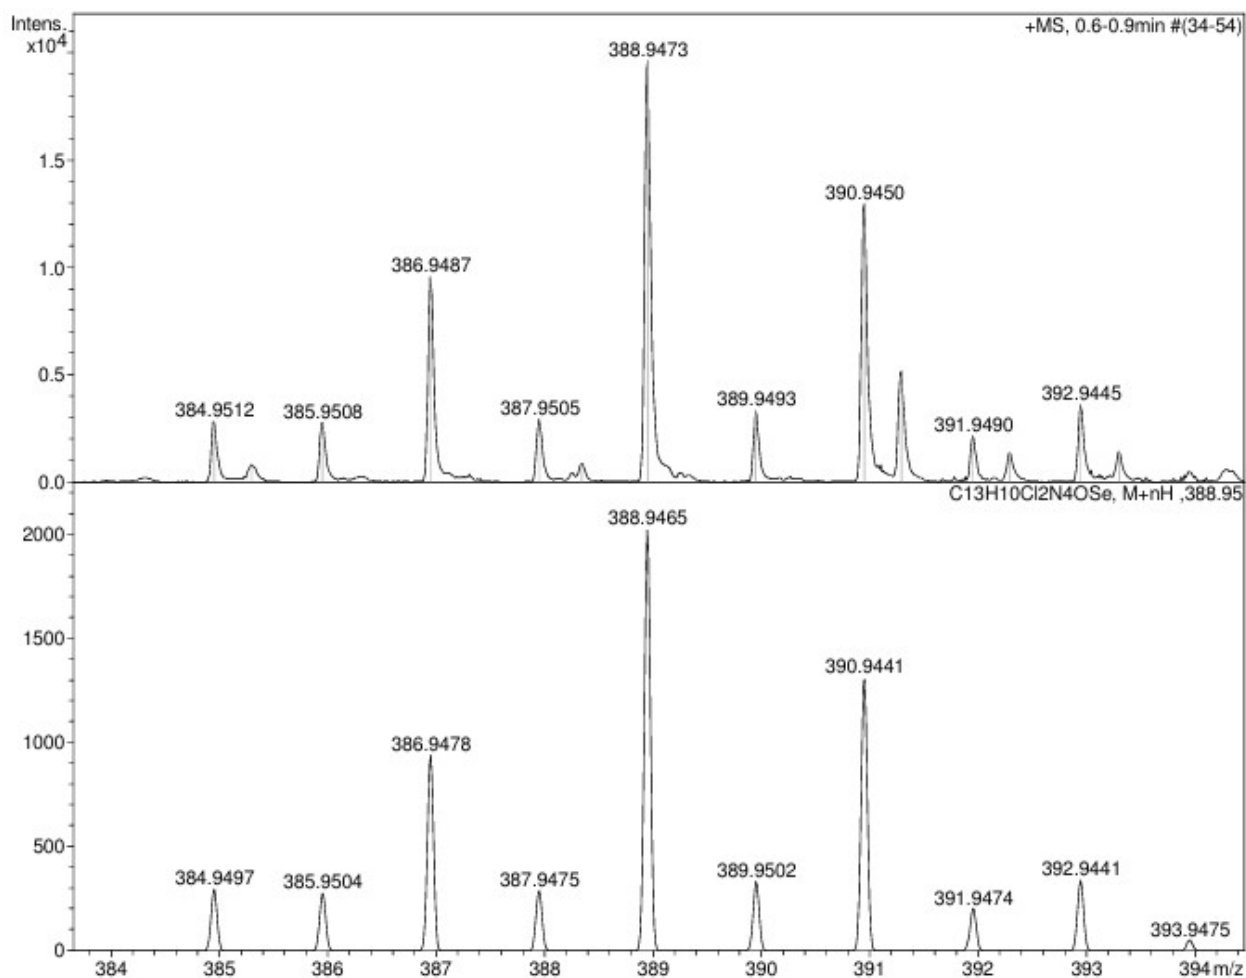

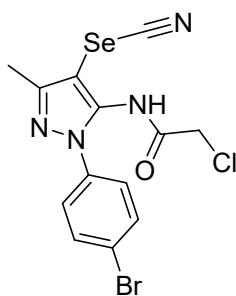

*N*-(1-(4-bromophenyl)-3-methyl-4-selenocyanato-1*H*-pyrazol-5-yl)-2-chloroacetamide, **4c**

Grey powder, m.p. 169-171°C, yield 96% (0.83 g)

$^1\text{H}$  NMR (300 MHz, DMSO- $d_6$ )  $\delta$  10.78 (s, 1H), 7.71 (d,  $J = 8.5$  Hz, 2H), 7.46 (d,  $J = 8.6$  Hz, 2H), 4.33 (s, 2H), 2.34 (s, 3H).  $^{77}\text{Se}$  NMR (57 MHz, DMSO)  $\delta$  161.08.  $^{13}\text{C}\{^1\text{H}\}$  NMR (76 MHz, DMSO)  $\delta$  166.37, 151.19, 138.10, 137.30, 132.34, 125.32, 120.90, 103.39, 95.00, 42.36, 13.14. HRMS (ESI-TOF):  $m/z$   $[\text{M}+\text{H}]^+$ : calcd for  $[\text{C}_{13}\text{H}_{11}\text{BrClN}_4\text{OSe}]^+$ : 432,8959; found: 432,8959.

**Figure-35:**  $^1\text{H}$  NMR spectrum (300 MHz) of **4c** in DMSO- $d_6$

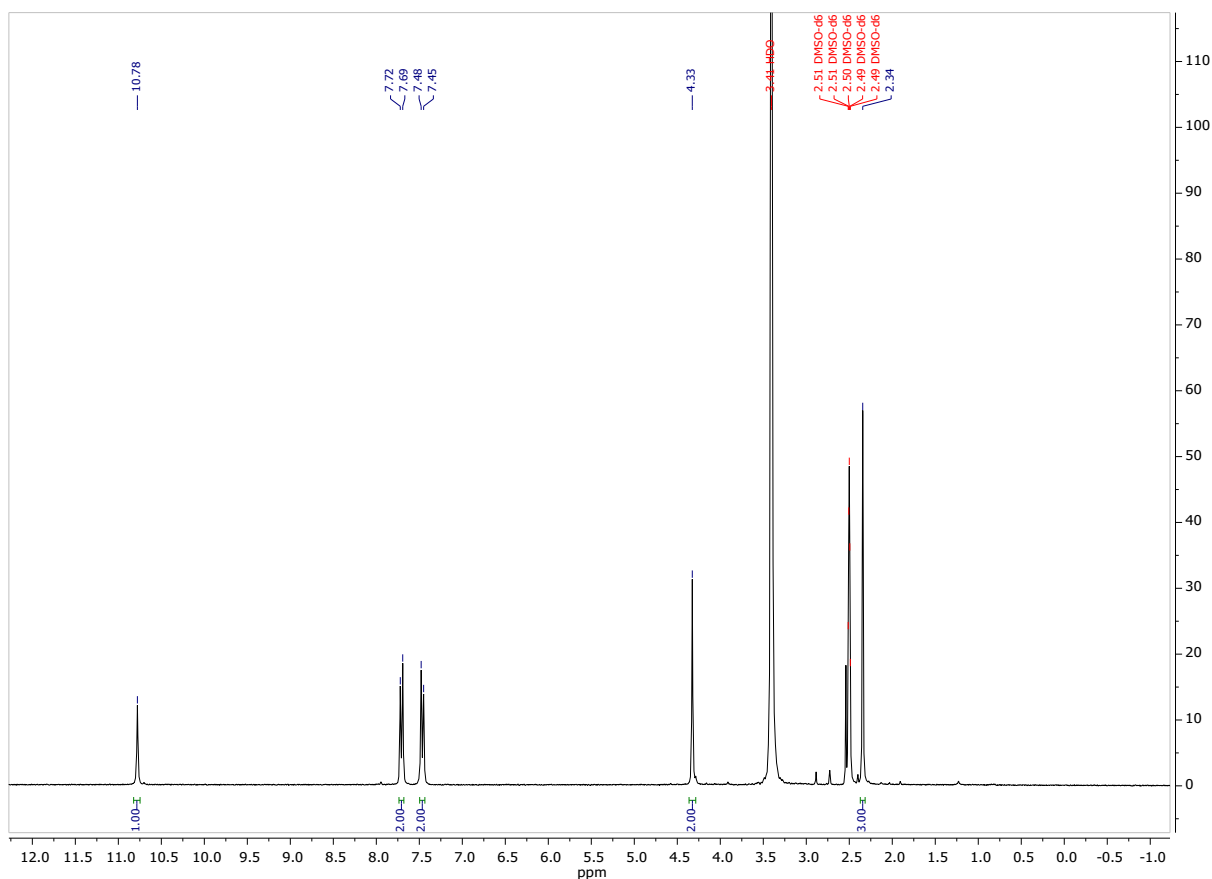

**Figure-36:**  $^{77}\text{Se}$  NMR spectrum (57 MHz) of **4c** in  $\text{DMSO-}d_6$

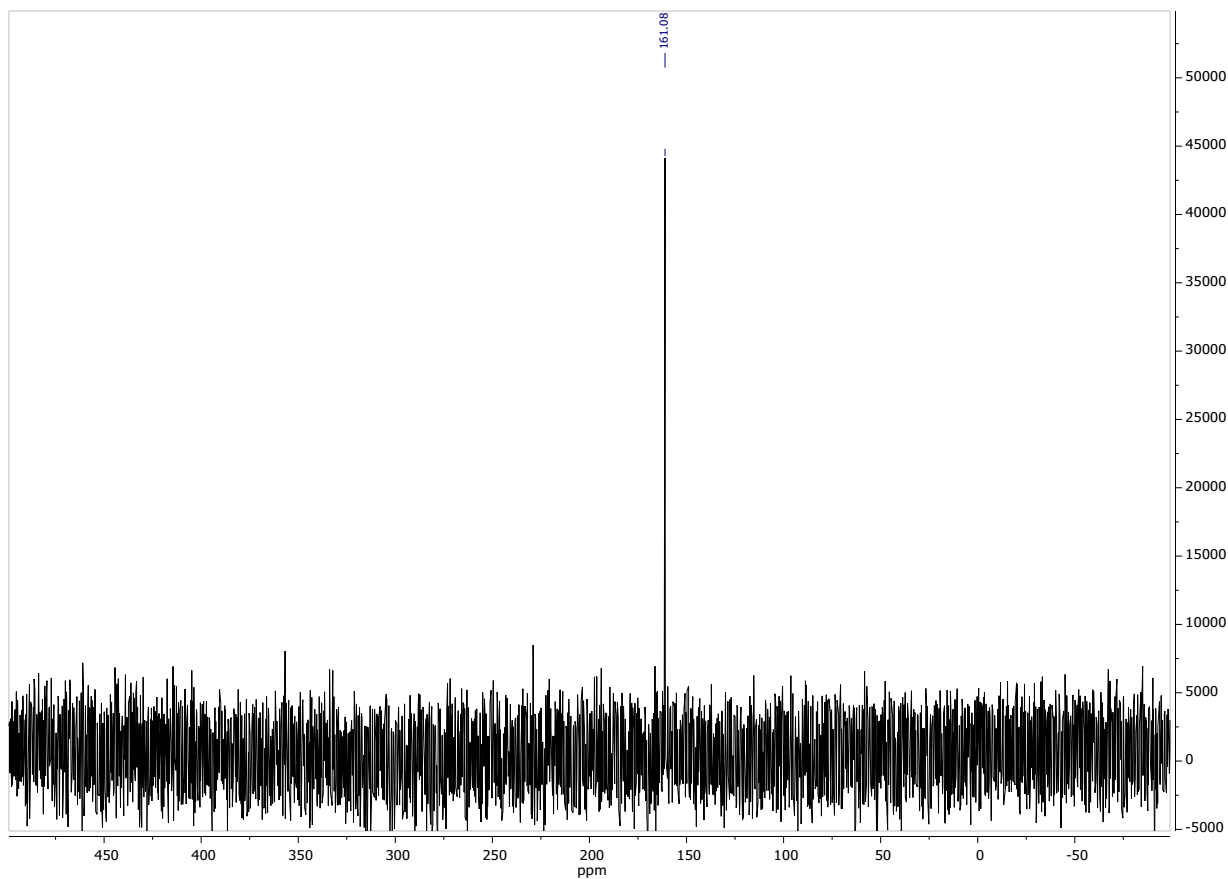

**Figure-37:**  $^{13}\text{C}$  NMR spectrum (76 MHz) of **4c** in  $\text{DMSO-}d_6$

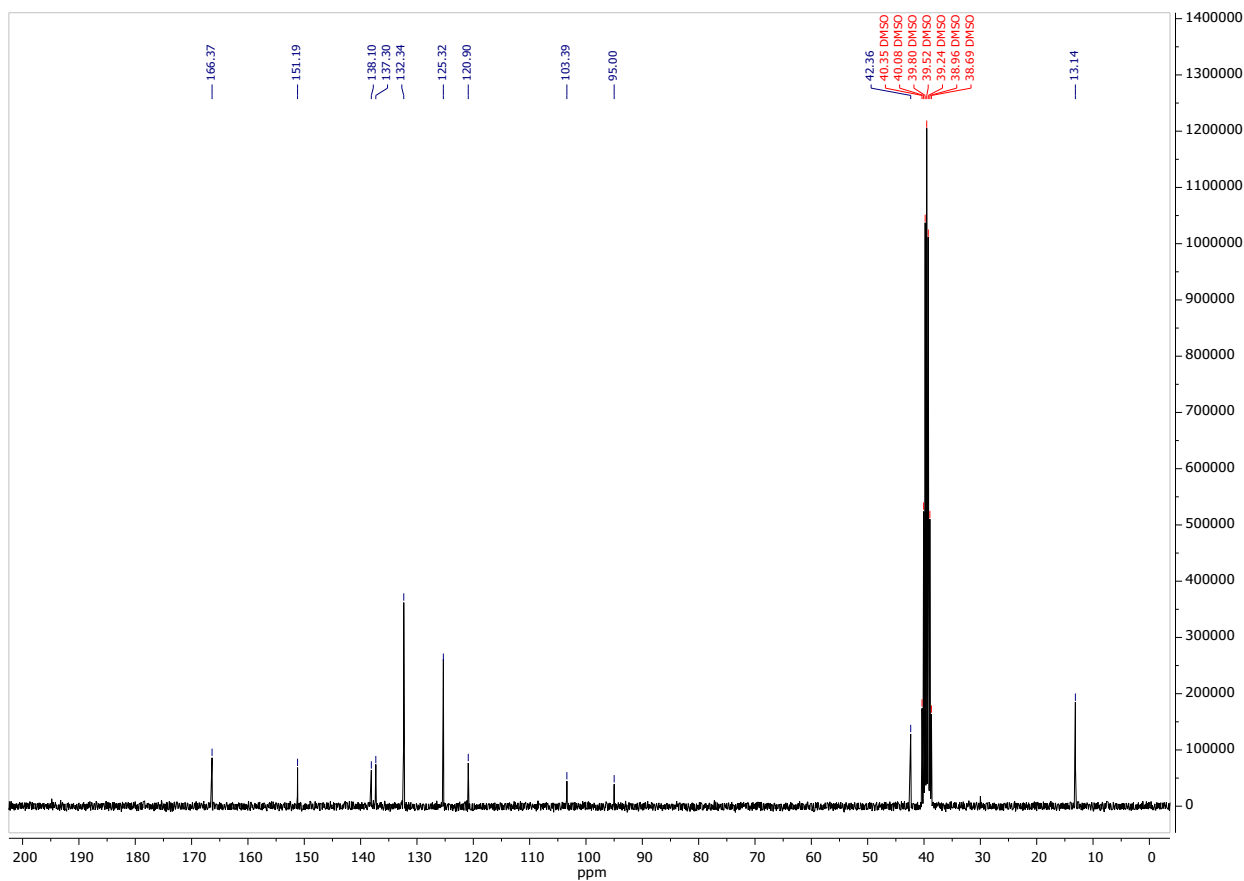

**Figure-38:** HRMS spectrum of compound **4c**

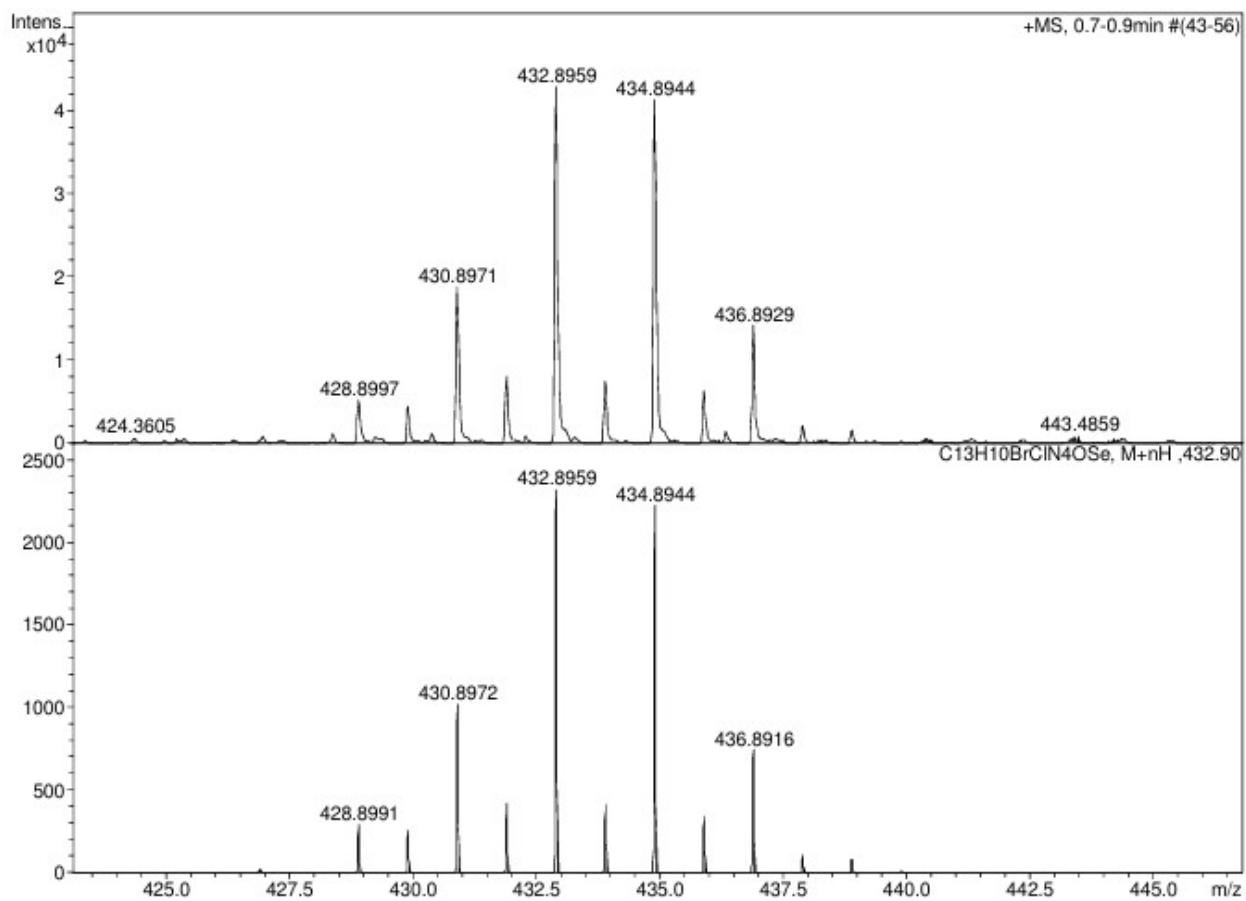

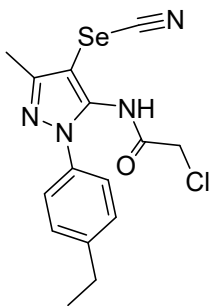

*2-Chloro-N-(1-(4-ethylphenyl)-3-methyl-4-selenocyanato-1H-pyrazol-5-yl)acetamide, 4d*

White powder, m.p. 142-144°C, yield 85% (0.65 g)

$^1\text{H}$  NMR (300 MHz, DMSO- $d_6$ )  $\delta$  10.72 (s, 1H), 7.46 – 7.28 (m, 4H), 4.32 (s, 2H), 2.66 (q,  $J = 7.6$  Hz, 2H), 2.34 (s, 3H), 1.21 (t,  $J = 7.6$  Hz, 3H).  $^{77}\text{Se}$  NMR (57 MHz, DMSO)  $\delta$  160.21.  $^{13}\text{C}\{^1\text{H}\}$  NMR (76 MHz, DMSO)  $\delta$  166.38, 150.55, 143.85, 137.76, 135.78, 128.58, 123.36, 103.28, 94.28, 42.28, 27.71, 15.43, 13.08. HRMS (ESI-TOF):  $m/z$   $[\text{M}+\text{H}]^+$ : calcd for  $[\text{C}_{15}\text{H}_{16}\text{ClN}_4\text{OSe}]^+$ : 383.0170; found: 383.0167.

**Figure-39:**  $^1\text{H}$  NMR spectrum (300 MHz) of **4d** in DMSO- $d_6$

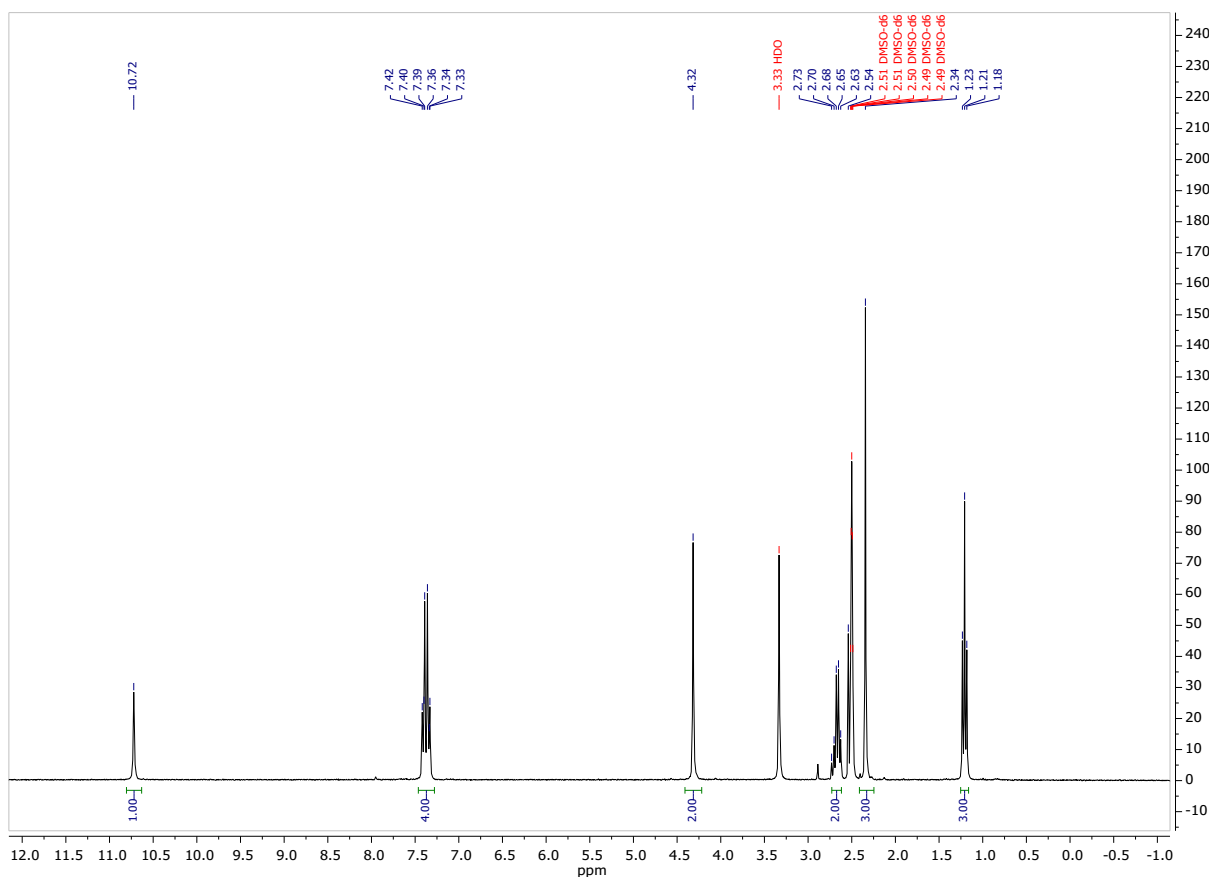

Figure-40:  $^{77}\text{Se}$  NMR spectrum (57 MHz) of **4d** in  $\text{DMSO-}d_6$

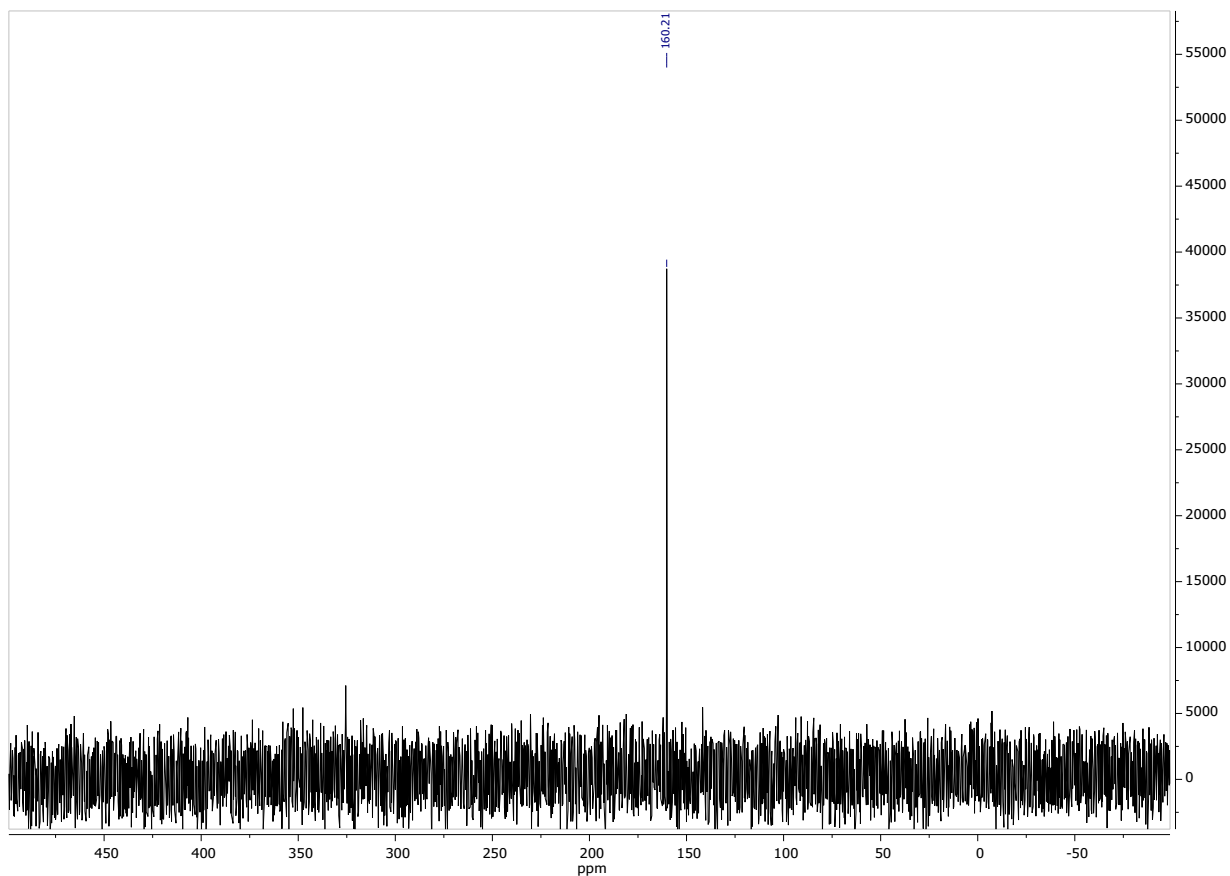

Figure-41:  $^{13}\text{C}$  NMR spectrum (76 MHz) of **4d** in  $\text{DMSO-}d_6$

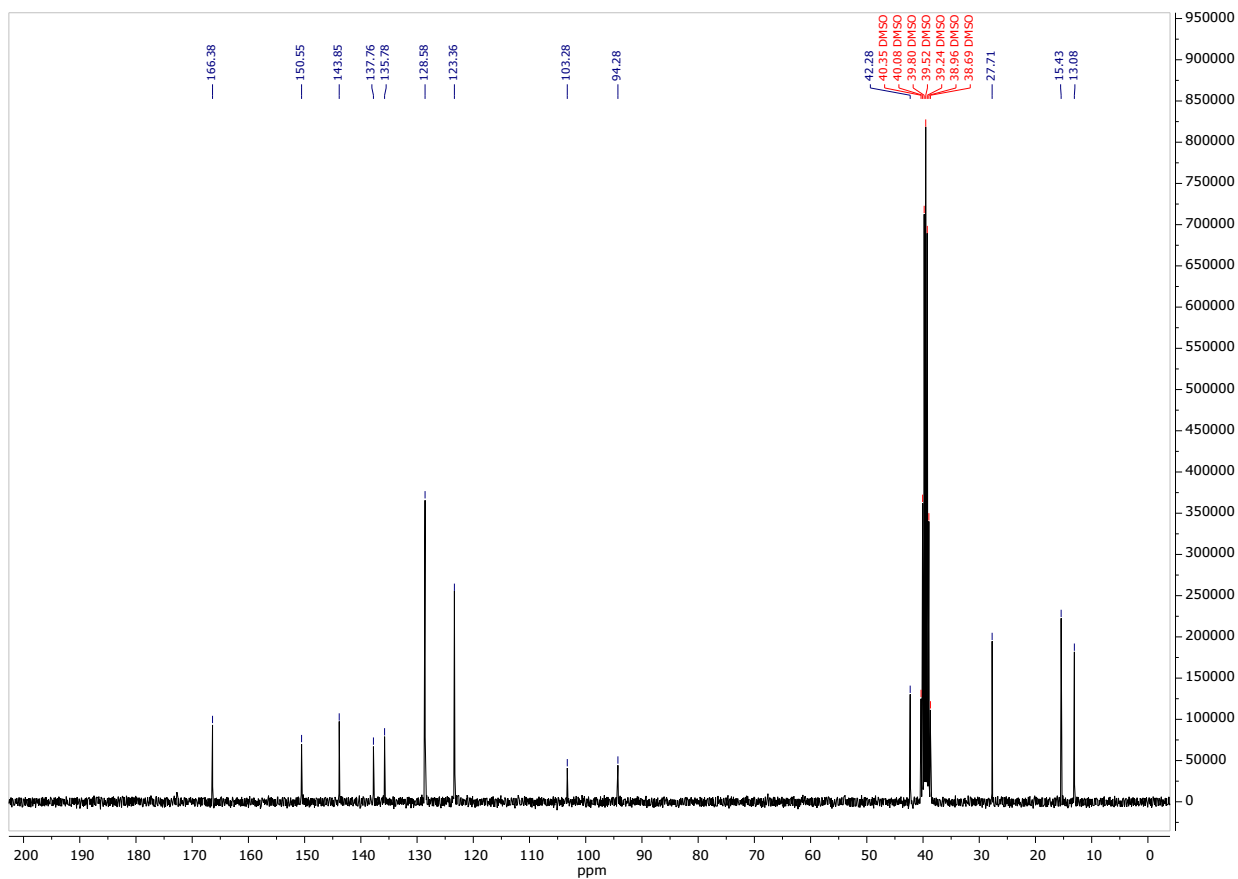

**Figure-42:** HRMS spectrum of compound **4d**

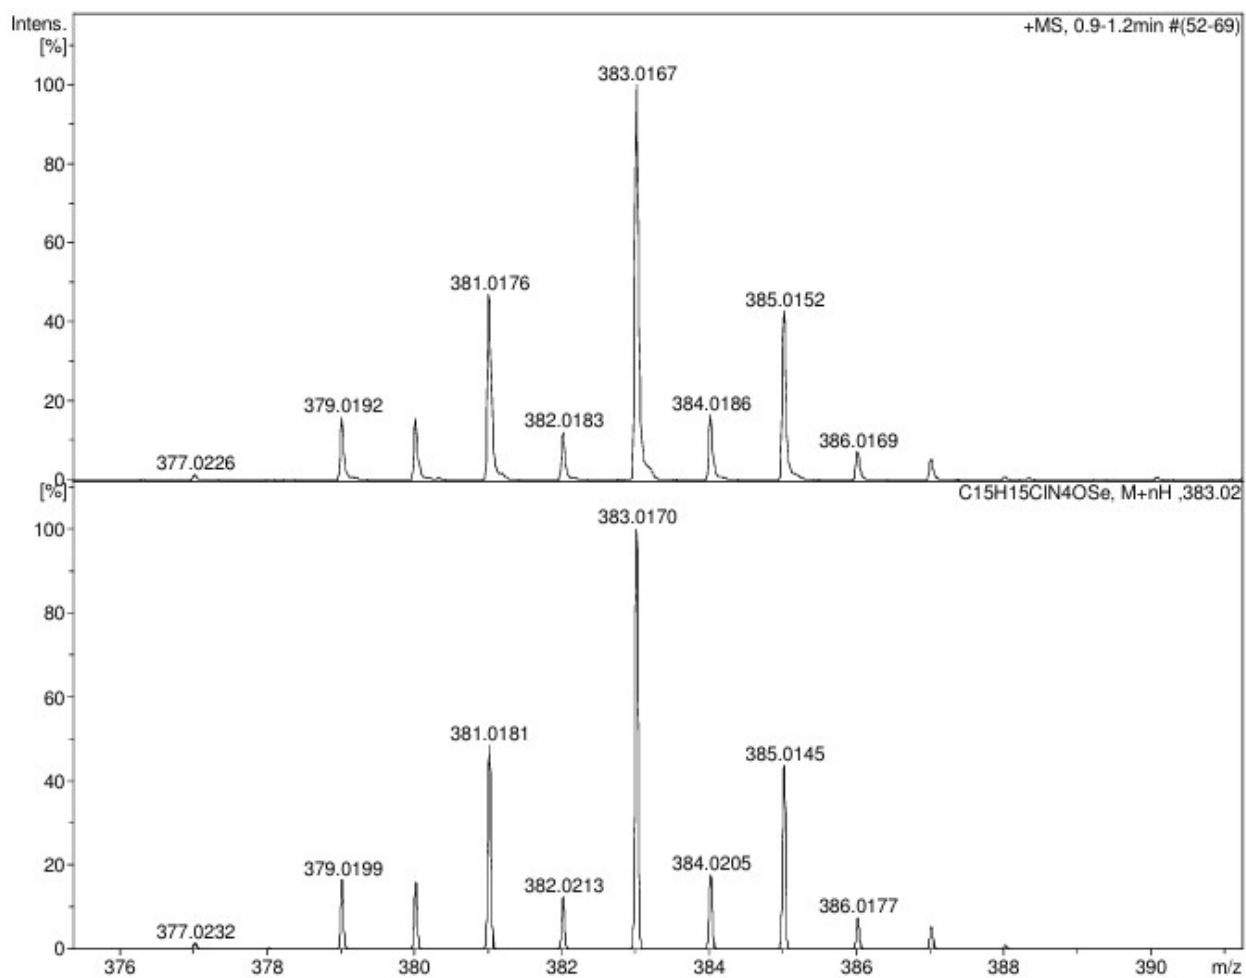

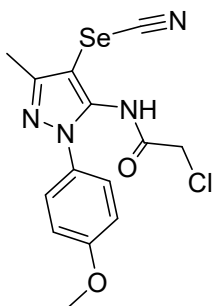

*2-Chloro-N-(1-(4-methoxyphenyl)-3-methyl-4-selenocyanato-1H-pyrazol-5-yl)acetamide, 4e*

Grey powder, m.p. 177-179°C, yield 64% (0.49 g)

$^1\text{H}$  NMR (300 MHz,  $\text{DMSO-}d_6$ )  $\delta$  10.66 (s, 1H), 7.39 (d,  $J = 8.8$  Hz, 2H), 7.05 (d,  $J = 8.9$  Hz, 2H), 4.29 (s, 2H), 3.80 (s, 3H), 2.33 (s, 3H).  $^{77}\text{Se}$  NMR (57 MHz, DMSO)  $\delta$  159.32.  $^{13}\text{C}\{^1\text{H}\}$  NMR (76 MHz, DMSO)  $\delta$  166.41, 158.92, 150.39, 137.90, 131.04, 125.17, 114.41, 103.34, 93.87, 55.53, 42.28, 13.09. HRMS (ESI-TOF):  $m/z$   $[\text{M}+\text{H}]^+$ : calcd for  $[\text{C}_{14}\text{H}_{14}\text{ClN}_4\text{O}_2\text{Se}]^+$ : 384.9963; found: 384.9959.

**Figure-43:**  $^1\text{H}$  NMR spectrum (300 MHz) of **4e** in  $\text{DMSO-}d_6$

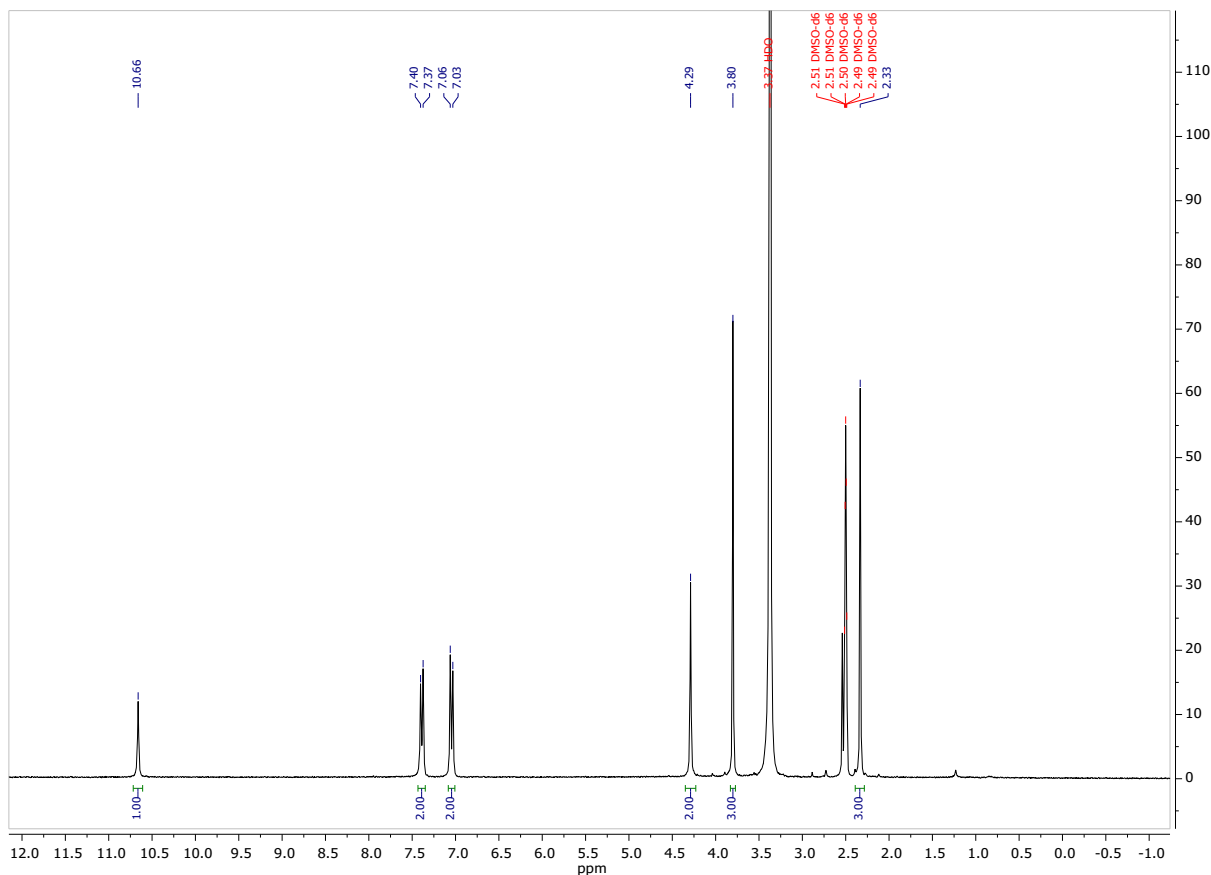

**Figure-44:**  $^{77}\text{Se}$  NMR spectrum (57 MHz) of **4e** in  $\text{DMSO-}d_6$

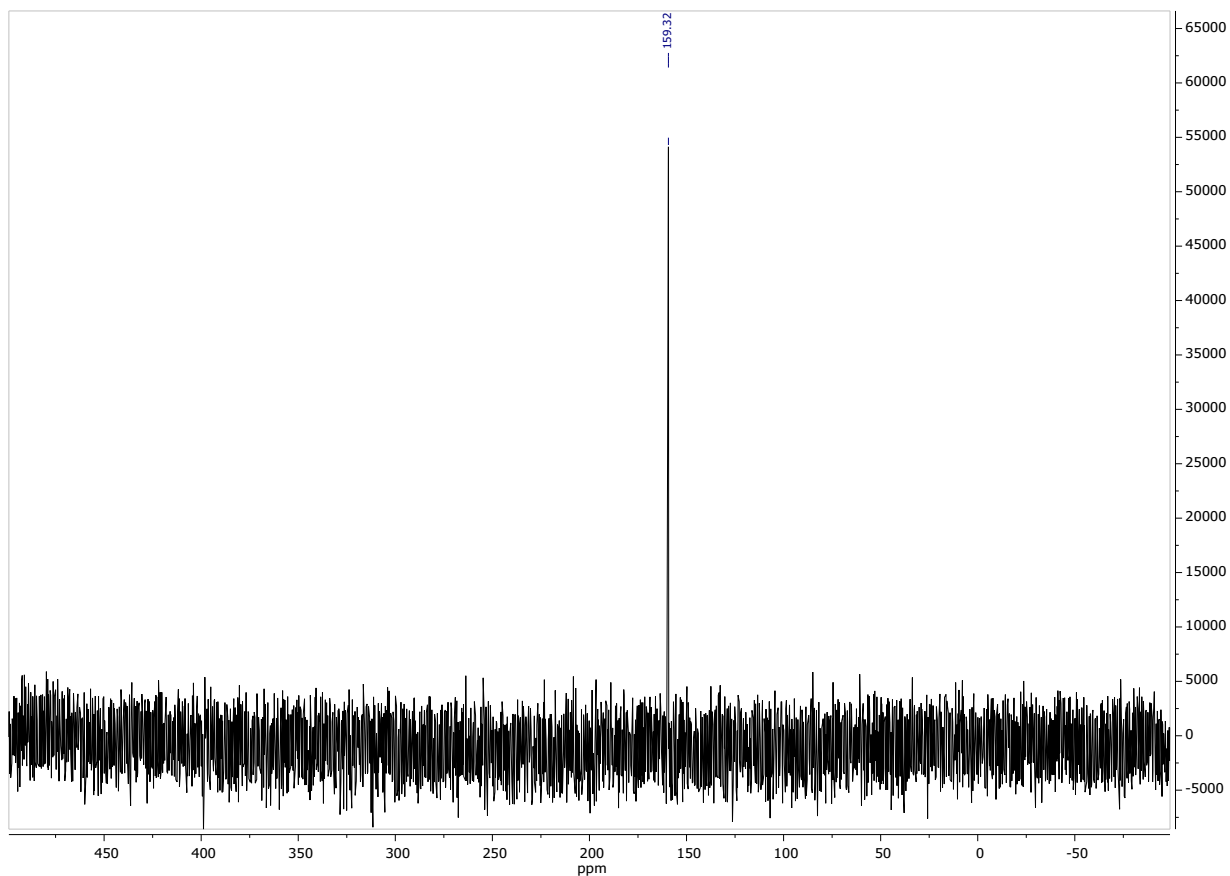

**Figure-45:**  $^{13}\text{C}$  NMR spectrum (76 MHz) of **4e** in  $\text{DMSO-}d_6$

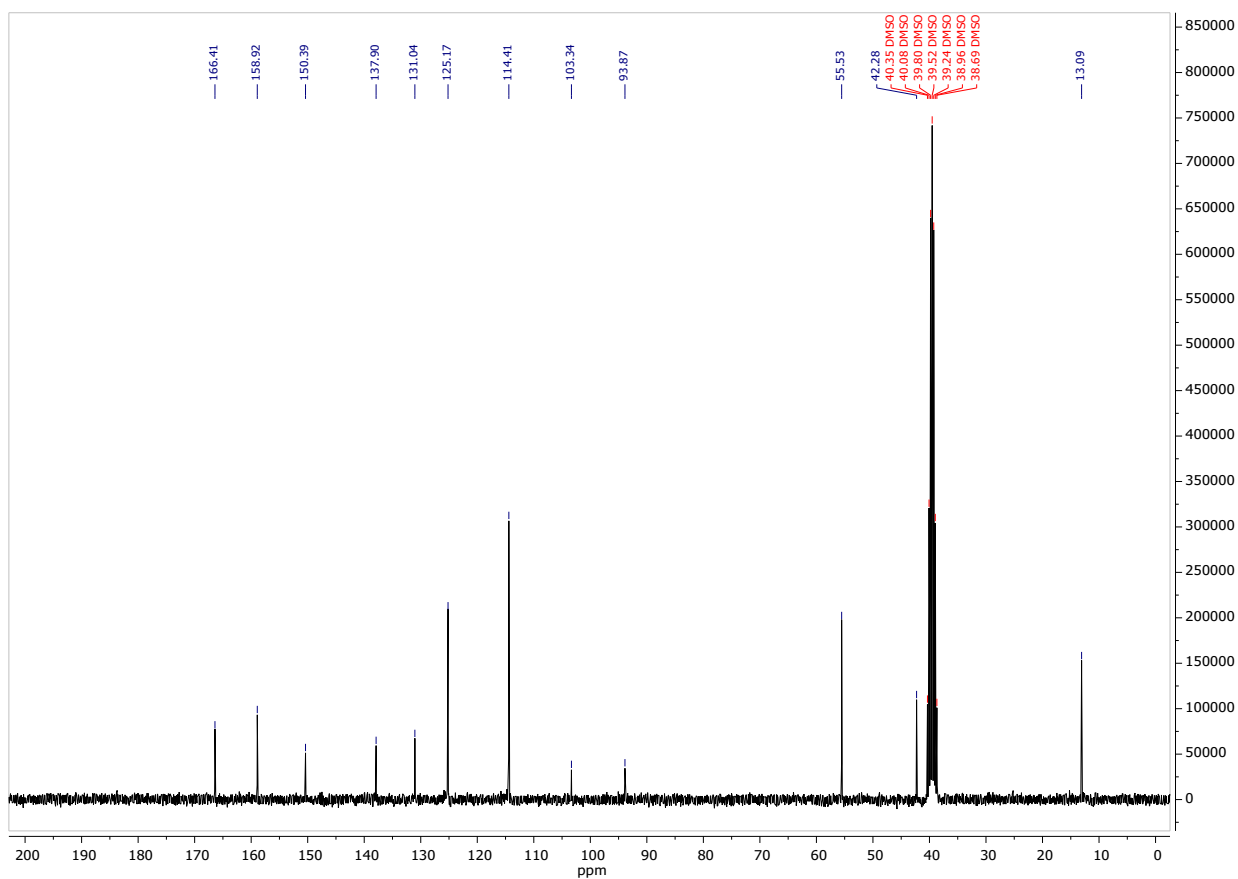

**Figure-46:** HRMS spectrum of compound **4e**

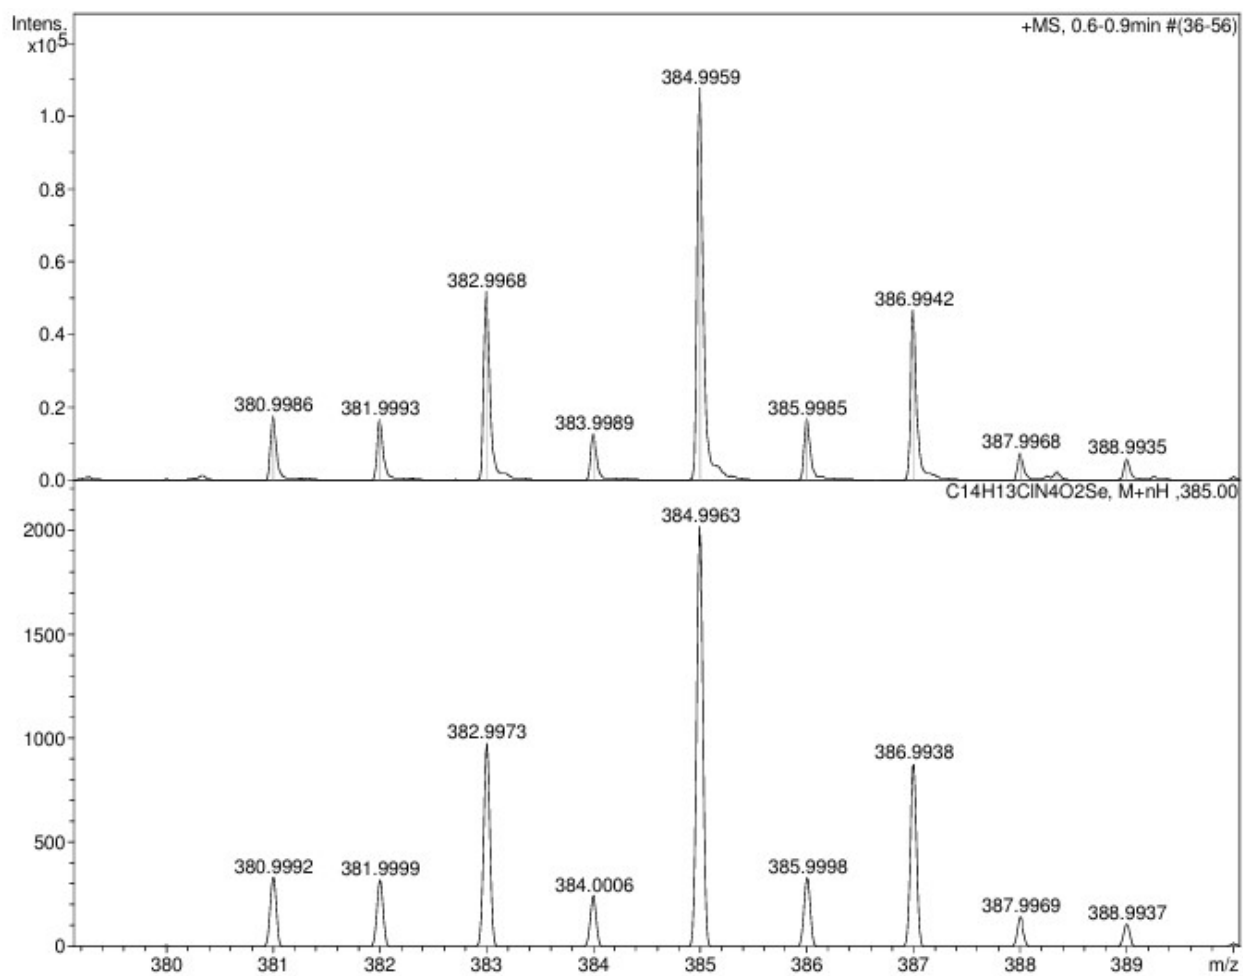

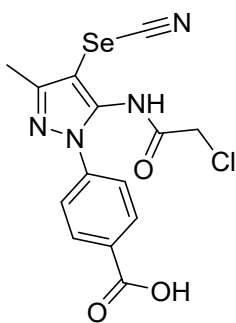

*4-(5-(2-Chloroacetamido)-3-methyl-4-selenocyanato-1H-pyrazol-1-yl)benzoic acid, 4f*

Grey powder, m.p. 279-281°C, yield 77% (0.62 g)

$^1\text{H}$  NMR (300 MHz, DMSO- $d_6$ )  $\delta$  13.14 (brs, s, 1H), 10.87 (s, 1H), 8.05 (d,  $J = 8.3$  Hz, 2H), 7.66 (d,  $J = 8.3$  Hz, 2H), 4.36 (s, 2H), 2.36 (s, 3H).  $^{77}\text{Se}$  NMR (57 MHz, DMSO)  $\delta$  161.74.  $^{13}\text{C}\{^1\text{H}\}$  NMR (76 MHz, DMSO)  $\delta$  166.56, 166.32, 151.47, 141.38, 138.22, 130.56, 129.82, 122.79, 103.37, 95.58, 42.40, 13.15. HRMS (ESI-TOF):  $m/z$   $[\text{M}+\text{H}]^+$ : calcd for  $[\text{C}_{14}\text{H}_{12}\text{ClN}_4\text{O}_3\text{Se}]^+$ : 398.9756; found: 398.9755.

**Figure-47:**  $^1\text{H}$  NMR spectrum (300 MHz) of **4f** in DMSO- $d_6$

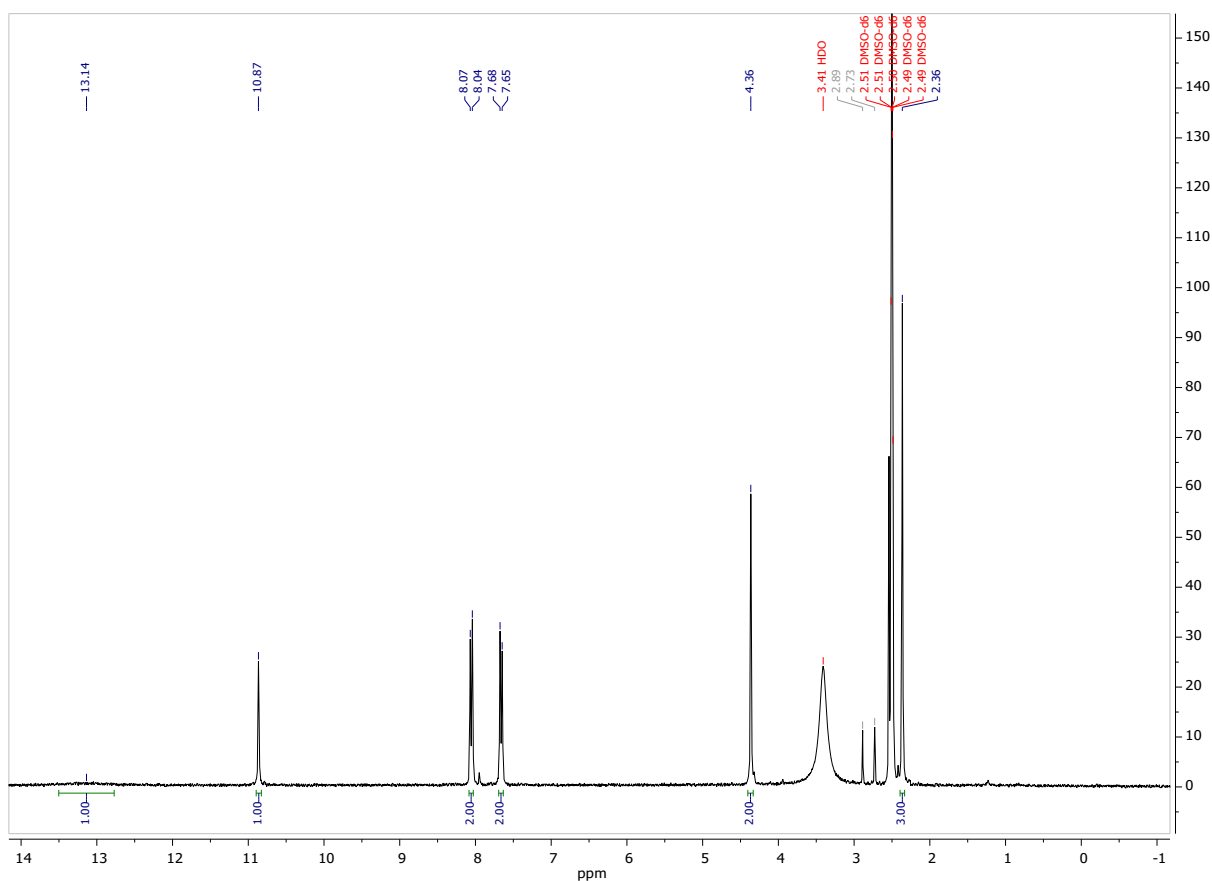

**Figure-48:**  $^{77}\text{Se}$  NMR spectrum (57 MHz) of **4f** in  $\text{DMSO-}d_6$

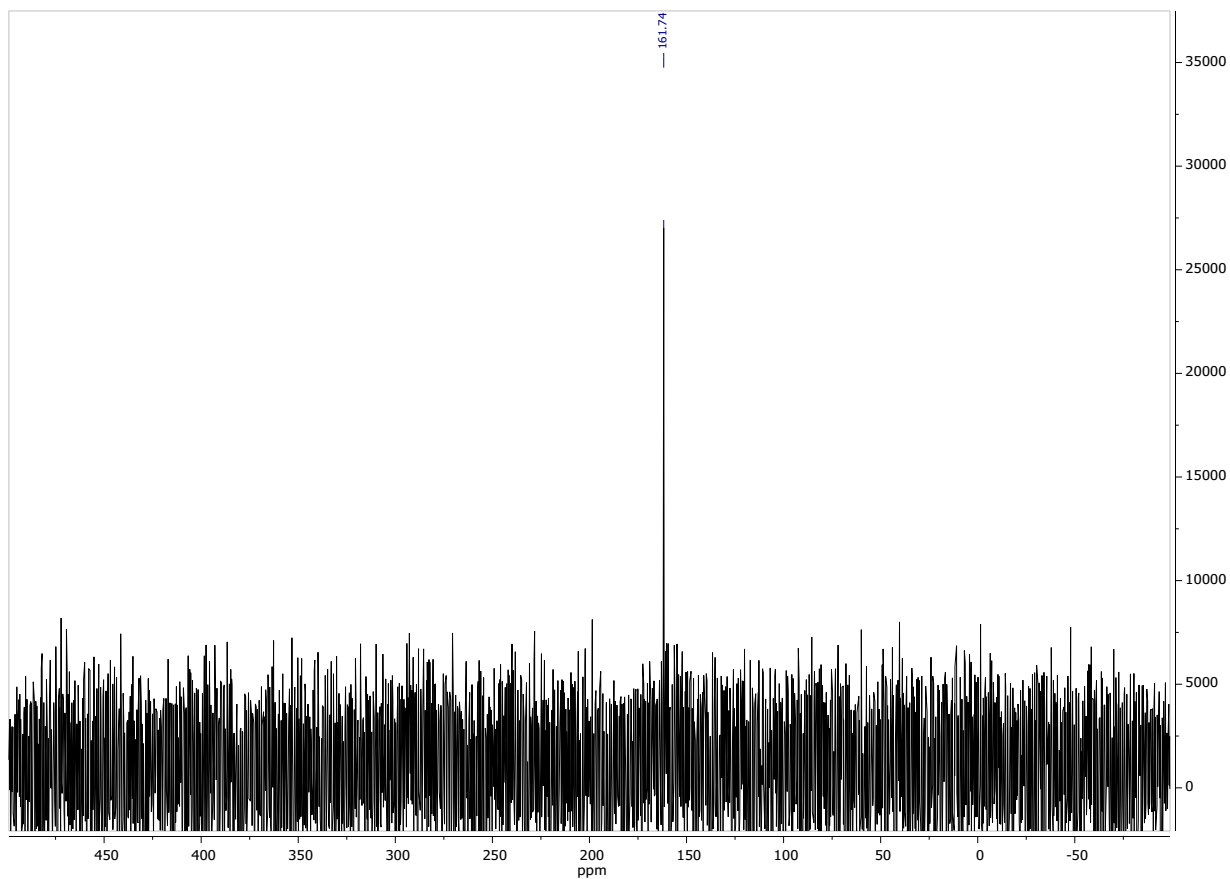

**Figure-49:**  $^{13}\text{C}$  NMR spectrum (76 MHz) of **4f** in  $\text{DMSO-}d_6$

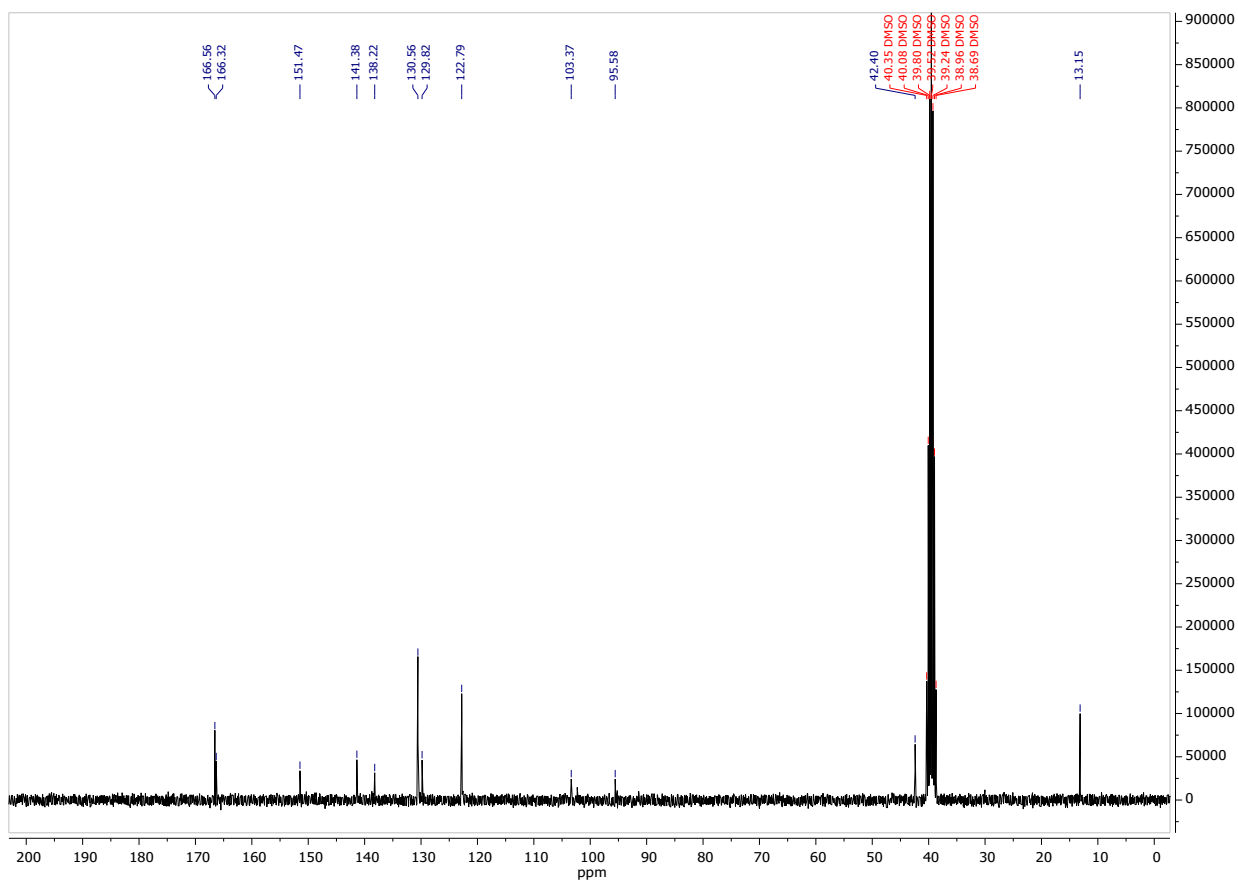

**Figure-50:** HRMS spectrum of compound **4f**

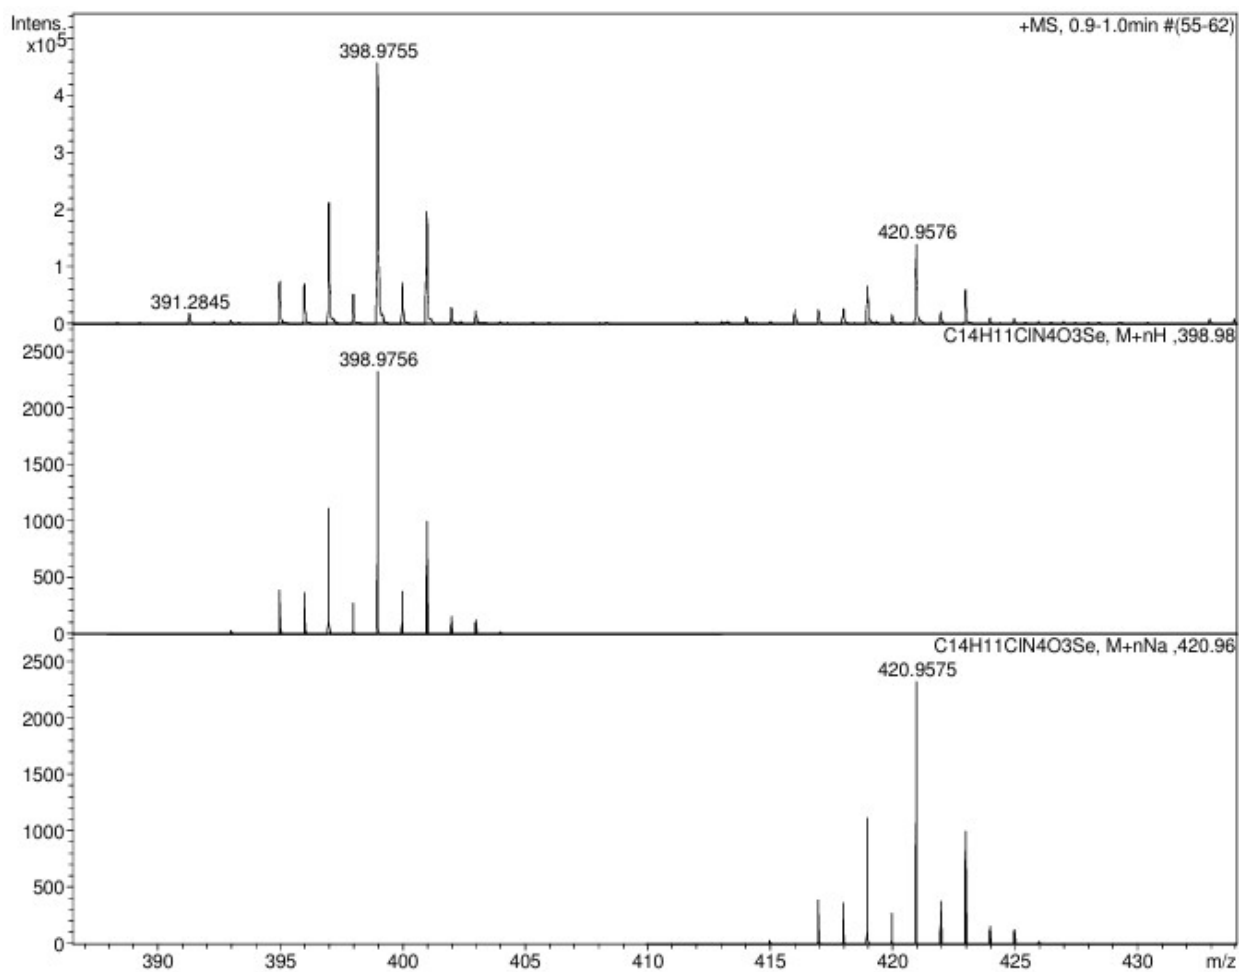

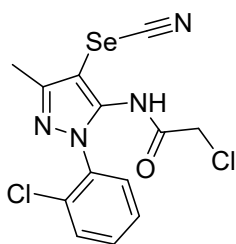

*2-Chloro-N-(1-(2-chlorophenyl)-3-methyl-4-selenocyanato-1H-pyrazol-5-yl)acetamide, 4g*

Grey powder, m.p. 124-126°C, yield 89% (0.69 g)

$^1\text{H}$  NMR (300 MHz, DMSO- $d_6$ )  $\delta$  10.76 (s, 1H), 7.69 – 7.64 (m, 1H), 7.59 – 7.48 (m, 3H), 4.20 (s, 2H), 2.33 (s, 3H).  $^{77}\text{Se}$  NMR (57 MHz, DMSO)  $\delta$  164.62.  $^{13}\text{C}\{^1\text{H}\}$  NMR (76 MHz, DMSO)  $\delta$  166.14, 150.84, 139.26, 135.19, 131.38, 130.56, 130.22, 129.97, 128.21, 103.87, 103.59, 42.16, 13.20. HRMS (ESI-TOF):  $m/z$   $[\text{M}+\text{H}]^+$ : calcd for  $[\text{C}_{13}\text{H}_{11}\text{Cl}_2\text{N}_4\text{OSe}]^+$ : 388.9465; found: 388.9460.

**Figure-51:**  $^1\text{H}$  NMR spectrum (300 MHz) of **4g** in DMSO- $d_6$

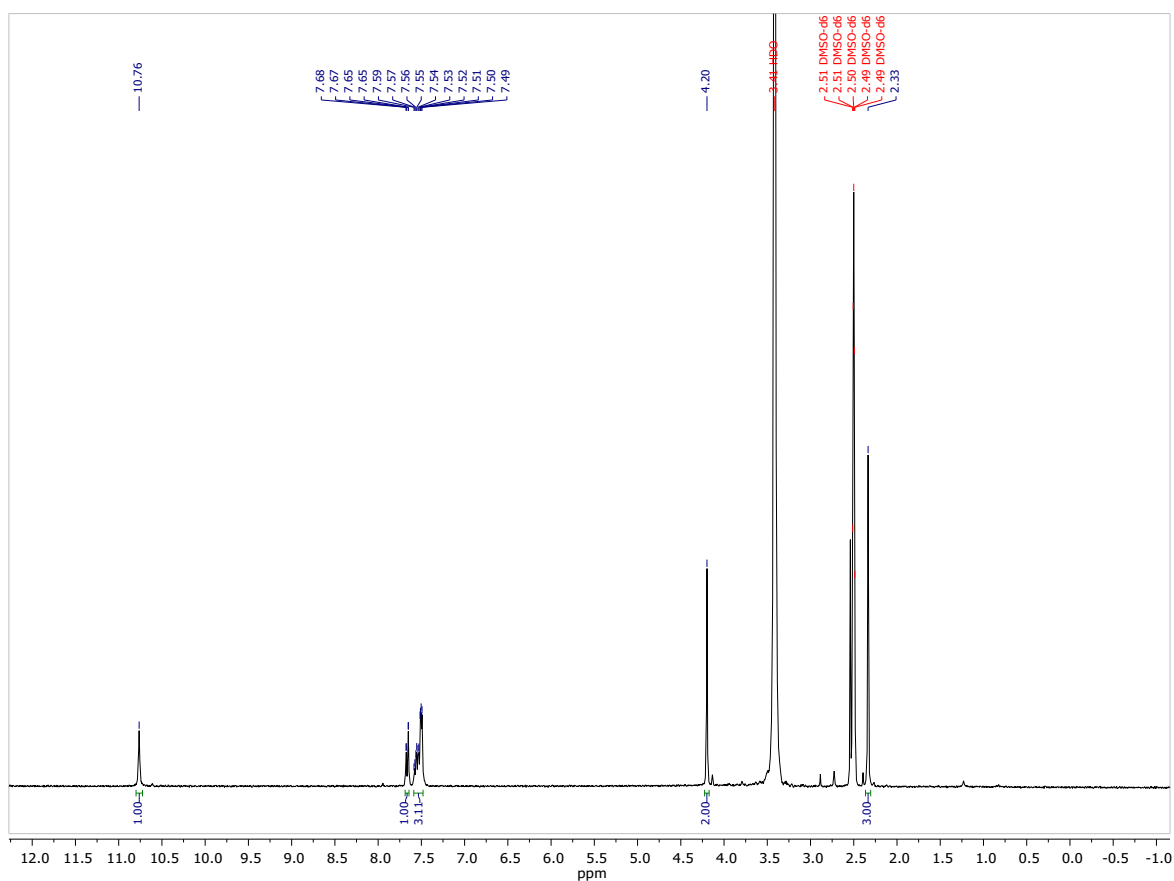

**Figure-52:**  $^{77}\text{Se}$  NMR spectrum (57 MHz) of **4g** in  $\text{DMSO-}d_6$

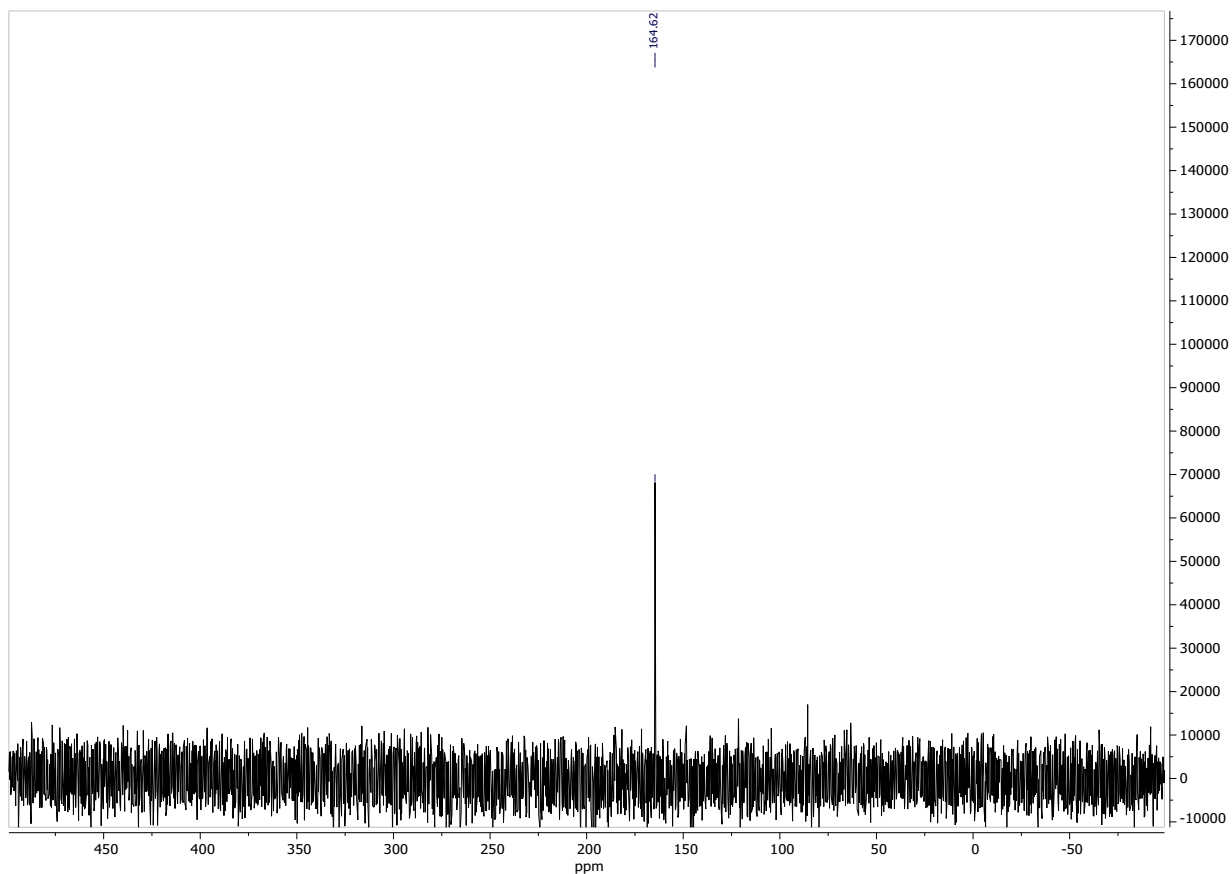

**Figure-53:**  $^{13}\text{C}$  NMR spectrum (76 MHz) of **4g** in  $\text{DMSO-}d_6$

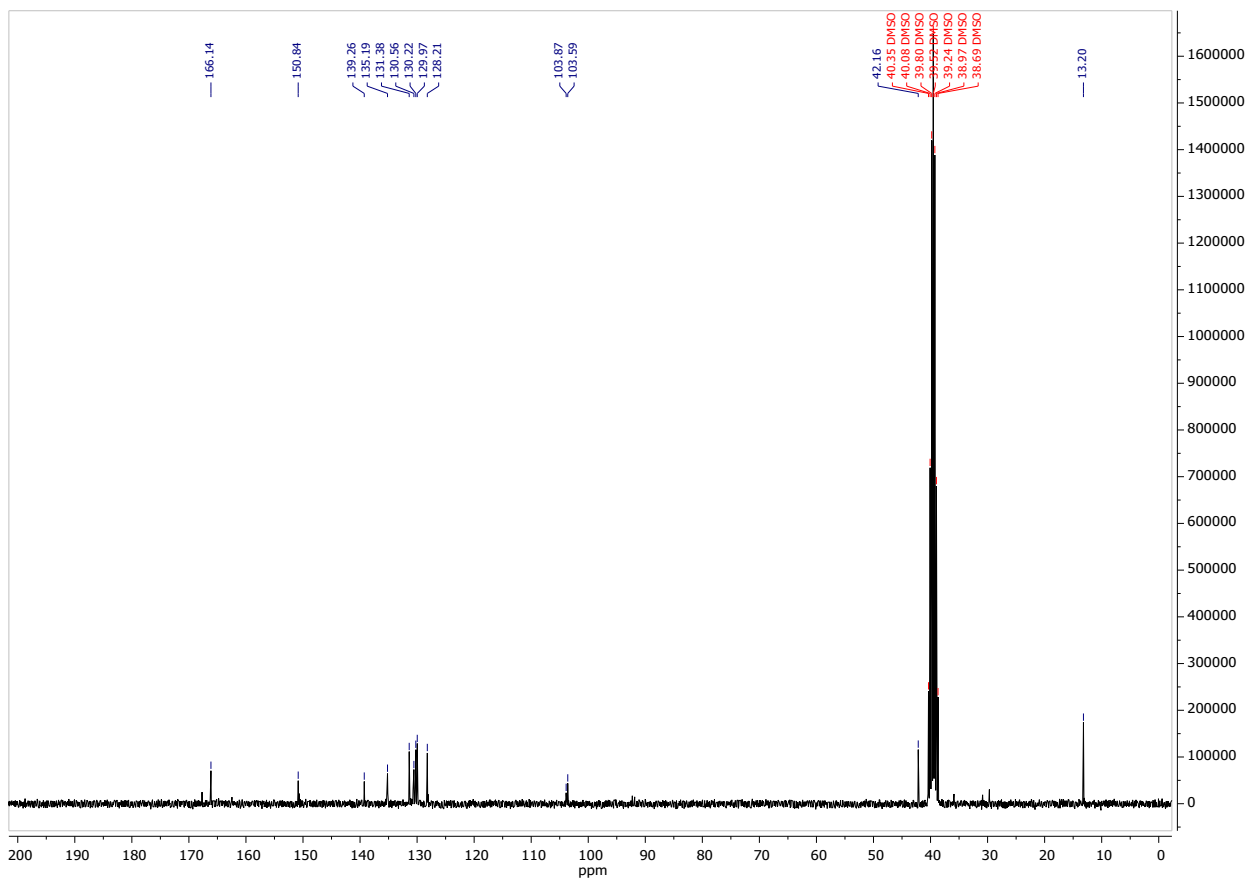

**Figure-54:** HRMS spectrum of compound **4g**

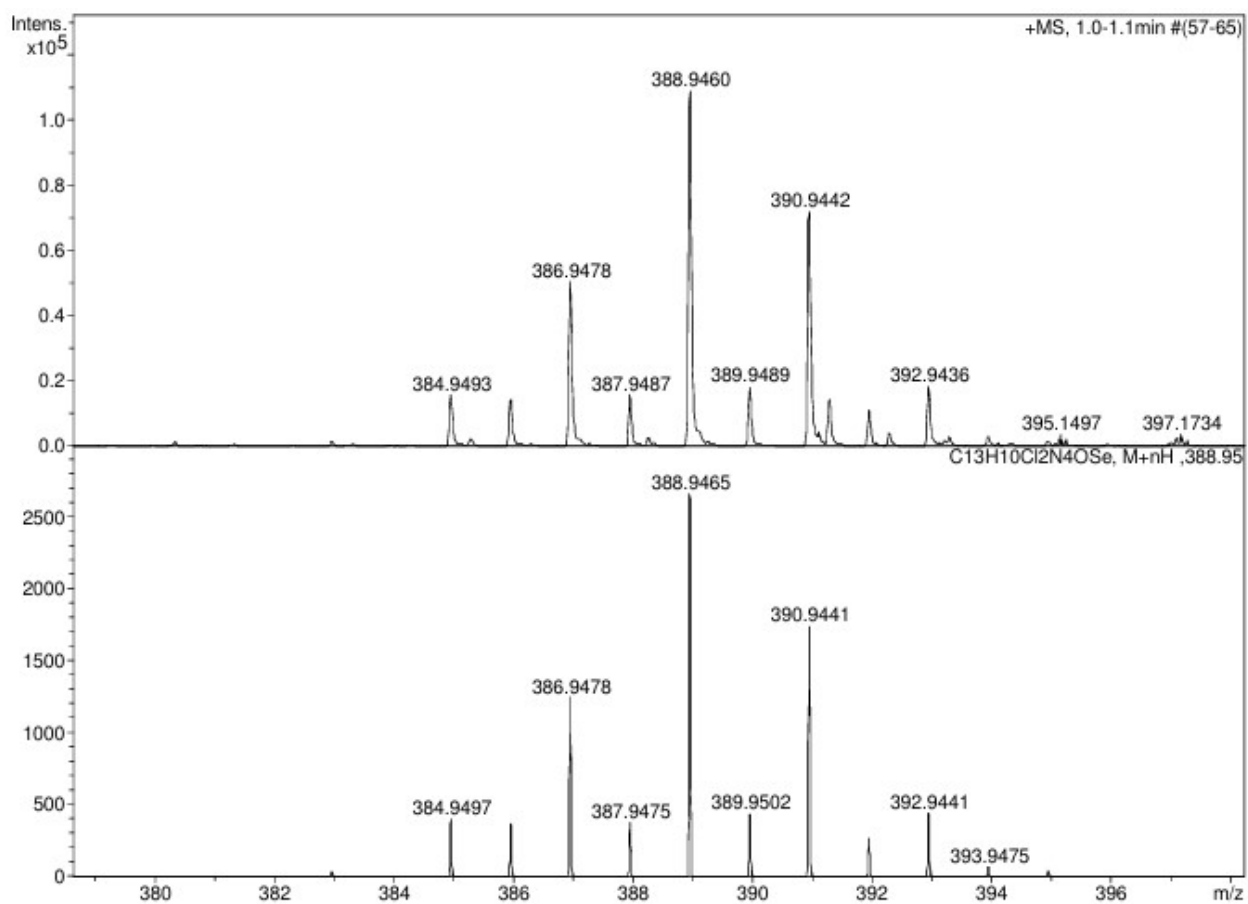

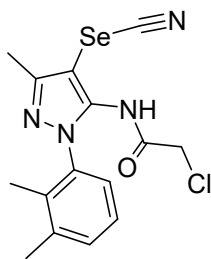

*2-Chloro-N-(1-(2,3-dimethylphenyl)-3-methyl-4-selenocyanato-1H-pyrazol-5-yl)acetamide, 4h*

Gray powder, m.p. 179-181°C, yield 80% (0.61 g)

$^1\text{H}$  NMR (300 MHz, DMSO- $d_6$ )  $\delta$  10.56 (s, 1H), 7.32 (d,  $J = 7.5$  Hz, 1H), 7.21 (t,  $J = 7.7$  Hz, 1H), 7.04 (d,  $J = 7.8$  Hz, 1H), 4.18 (s, 2H), 2.33 (s, 3H), 2.29 (s, 3H), 1.84 (s, 3H).  $^{77}\text{Se}$  NMR (57 MHz, DMSO)  $\delta$  161.10.  $^{13}\text{C}\{^1\text{H}\}$  NMR (76 MHz, DMSO)  $\delta$  166.20, 150.12, 138.90, 138.06, 136.72, 133.95, 130.76, 125.88, 125.06, 103.47, 91.93, 42.09, 19.85, 13.95, 13.13. HRMS (ESI-TOF):  $m/z$   $[\text{M}+\text{H}]^+$ : calcd for  $[\text{C}_{15}\text{H}_{16}\text{ClN}_4\text{OSe}]^+$ : 383.0170; found: 383.0159.

**Figure-55:**  $^1\text{H}$  NMR spectrum (300 MHz) of **4h** in DMSO- $d_6$

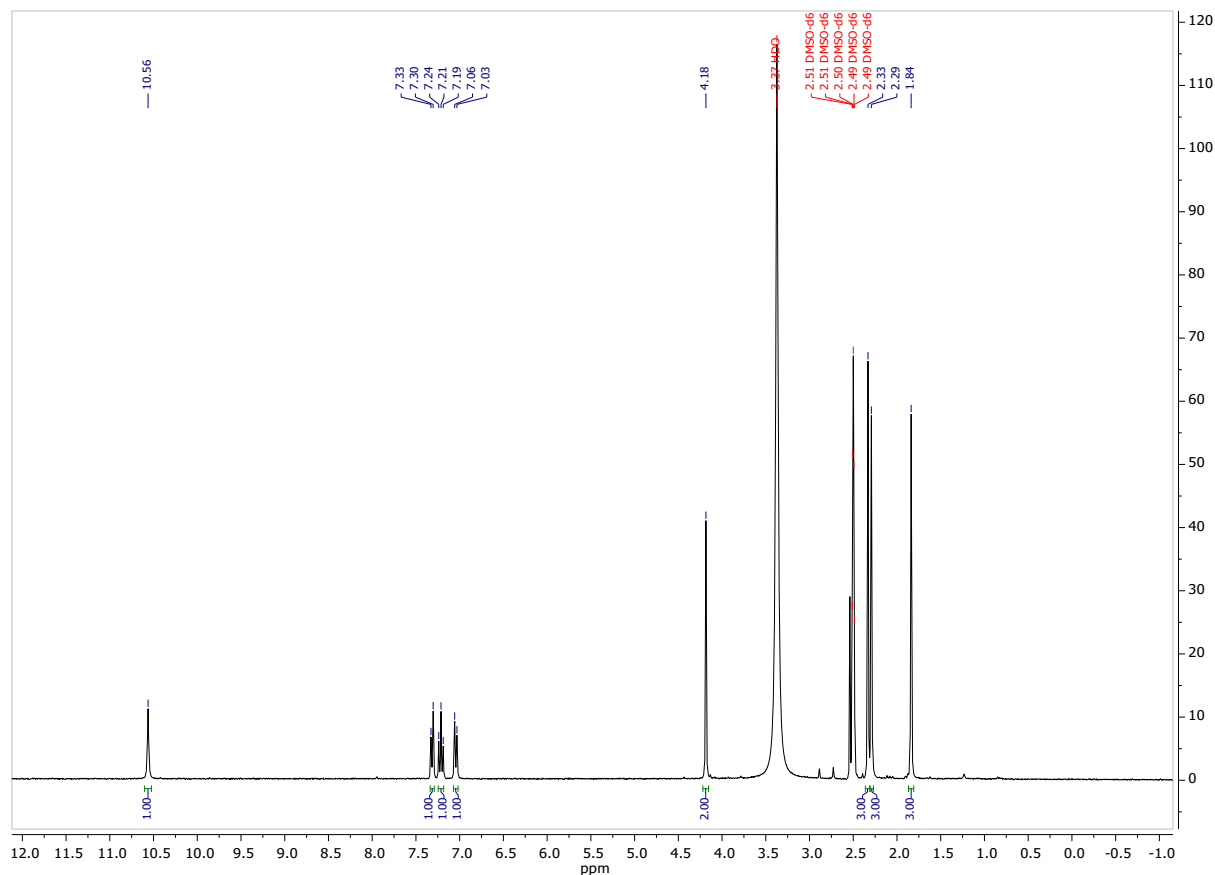

**Figure-56:**  $^{77}\text{Se}$  NMR spectrum (57 MHz) of **4h** in  $\text{DMSO-}d_6$

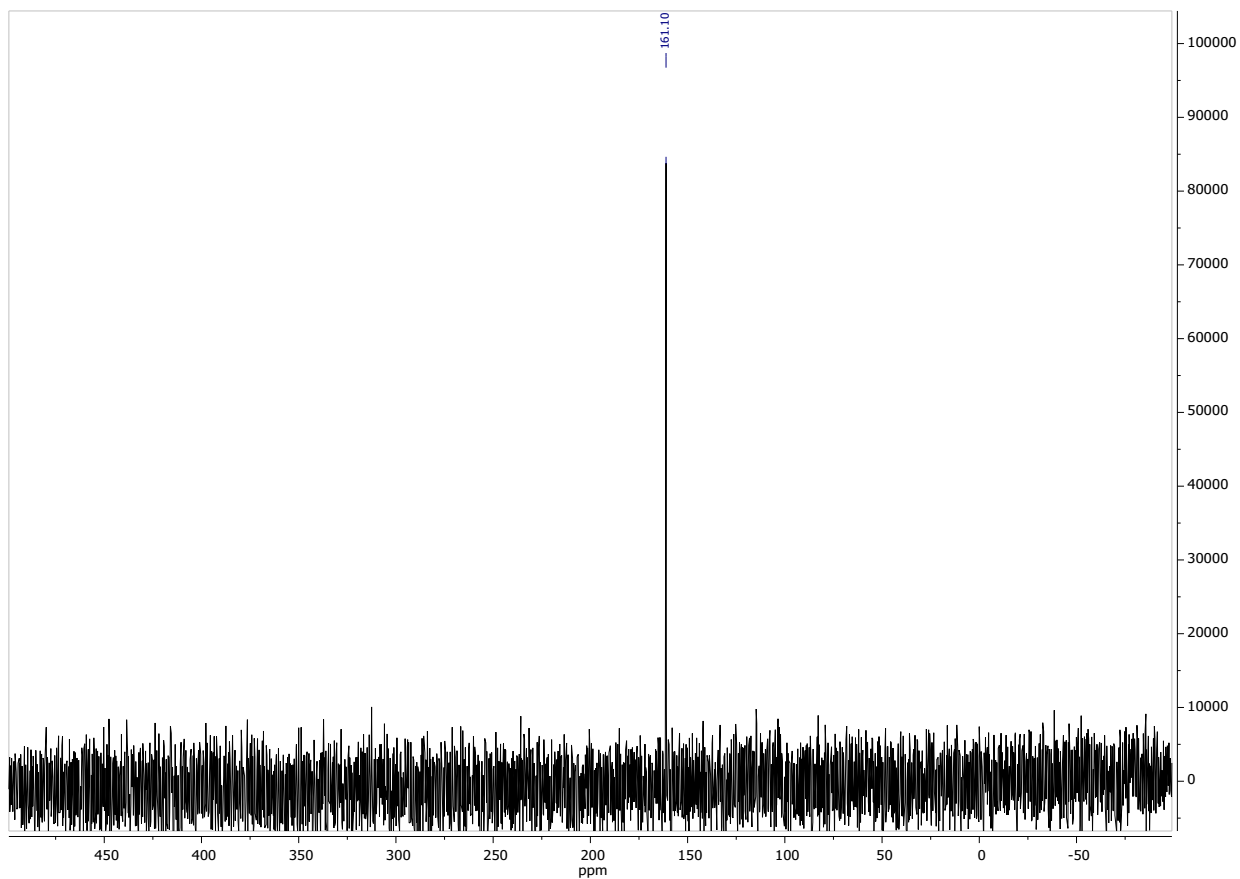

**Figure-57:**  $^{13}\text{C}$  NMR spectrum (76 MHz) of **4h** in  $\text{DMSO-}d_6$

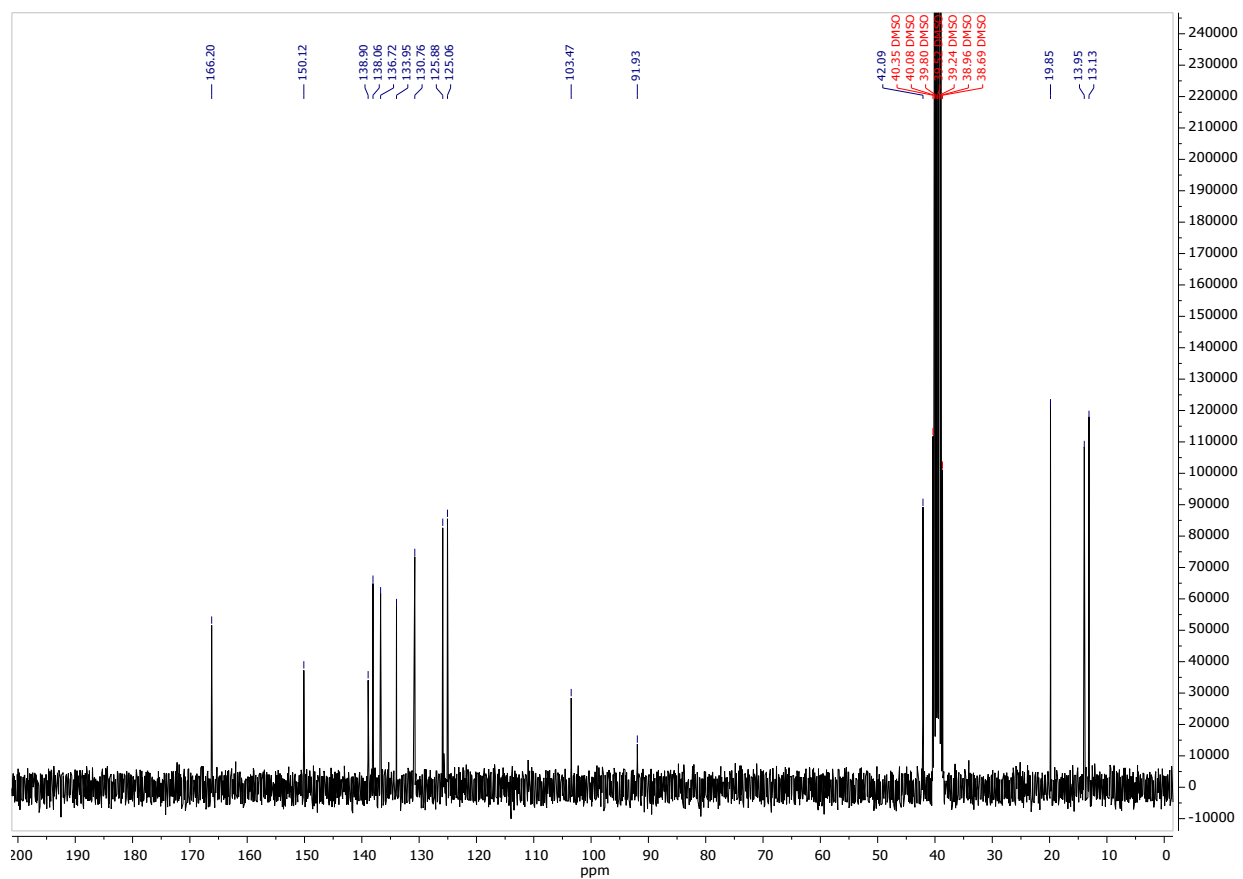

**Figure-58:** HRMS spectrum of compound **4h**

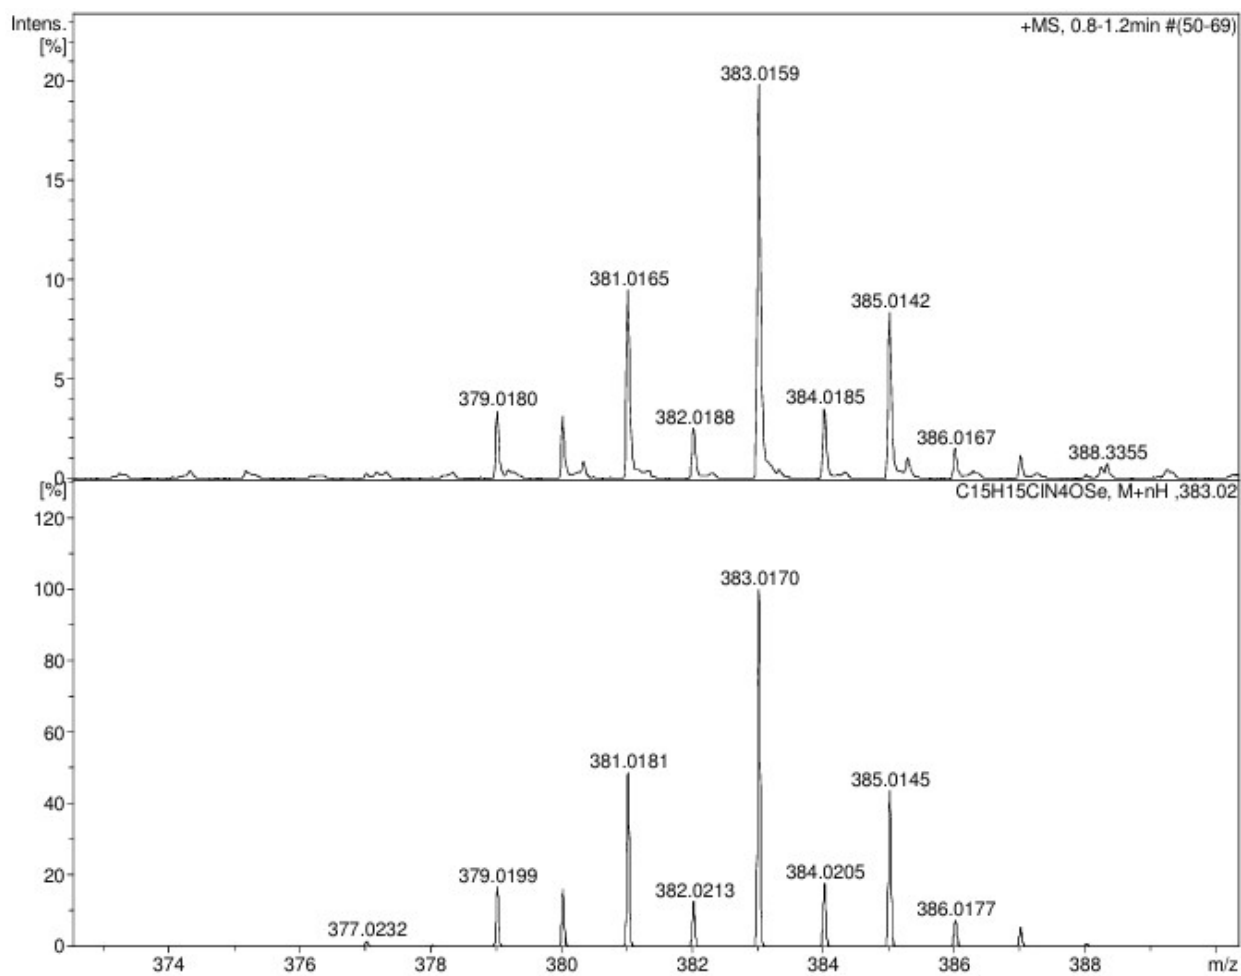

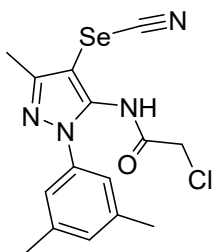

*2-Chloro-N-(1-(3,5-dimethylphenyl)-3-methyl-4-selenocyanato-1H-pyrazol-5-yl)acetamide, 4i*

White powder, m.p. 179-181°C, yield 91% (0.69 g)

$^1\text{H}$  NMR (300 MHz, DMSO- $d_6$ )  $\delta$  10.73 (s, 1H), 7.11 (s, 2H), 7.06 (s, 1H), 4.30 (s, 2H), 2.34 (s, 3H), 2.32 (s, 6H).  $^{77}\text{Se}$  NMR (57 MHz, DMSO)  $\delta$  160.20.  $^{13}\text{C}\{^1\text{H}\}$  NMR (76 MHz, DMSO)  $\delta$  166.28, 150.50, 138.66, 137.82, 137.72, 129.37, 120.92, 103.30, 94.42, 42.22, 20.77, 13.05. HRMS (ESI-TOF):  $m/z$   $[\text{M}+\text{H}]^+$ : calcd for  $[\text{C}_{15}\text{H}_{16}\text{ClN}_4\text{OSe}]^+$ : 383.0170; found: 383.0174.

**Figure-59:**  $^1\text{H}$  NMR spectrum (300 MHz) of **4i** in DMSO- $d_6$

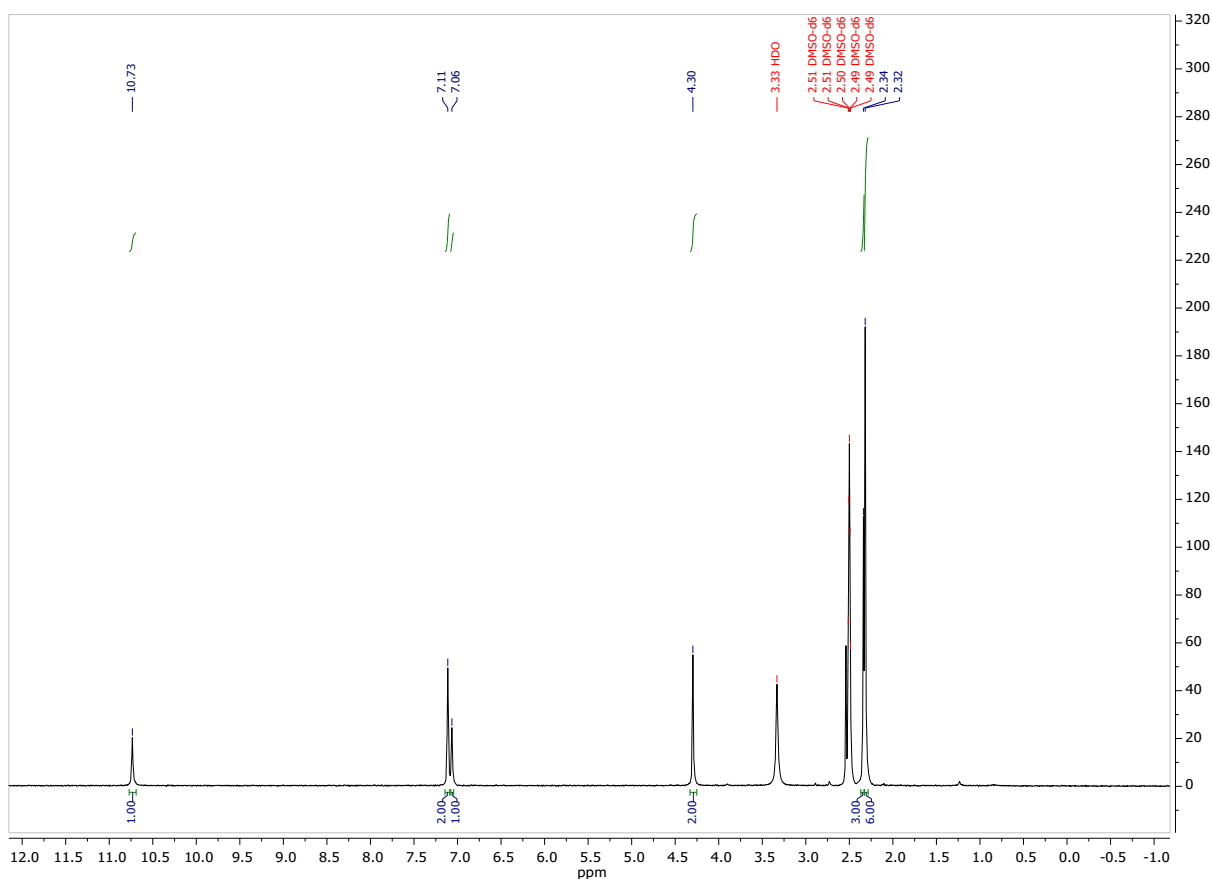

**Figure-60:**  $^{77}\text{Se}$  NMR spectrum (57 MHz) of **4i** in  $\text{DMSO-}d_6$

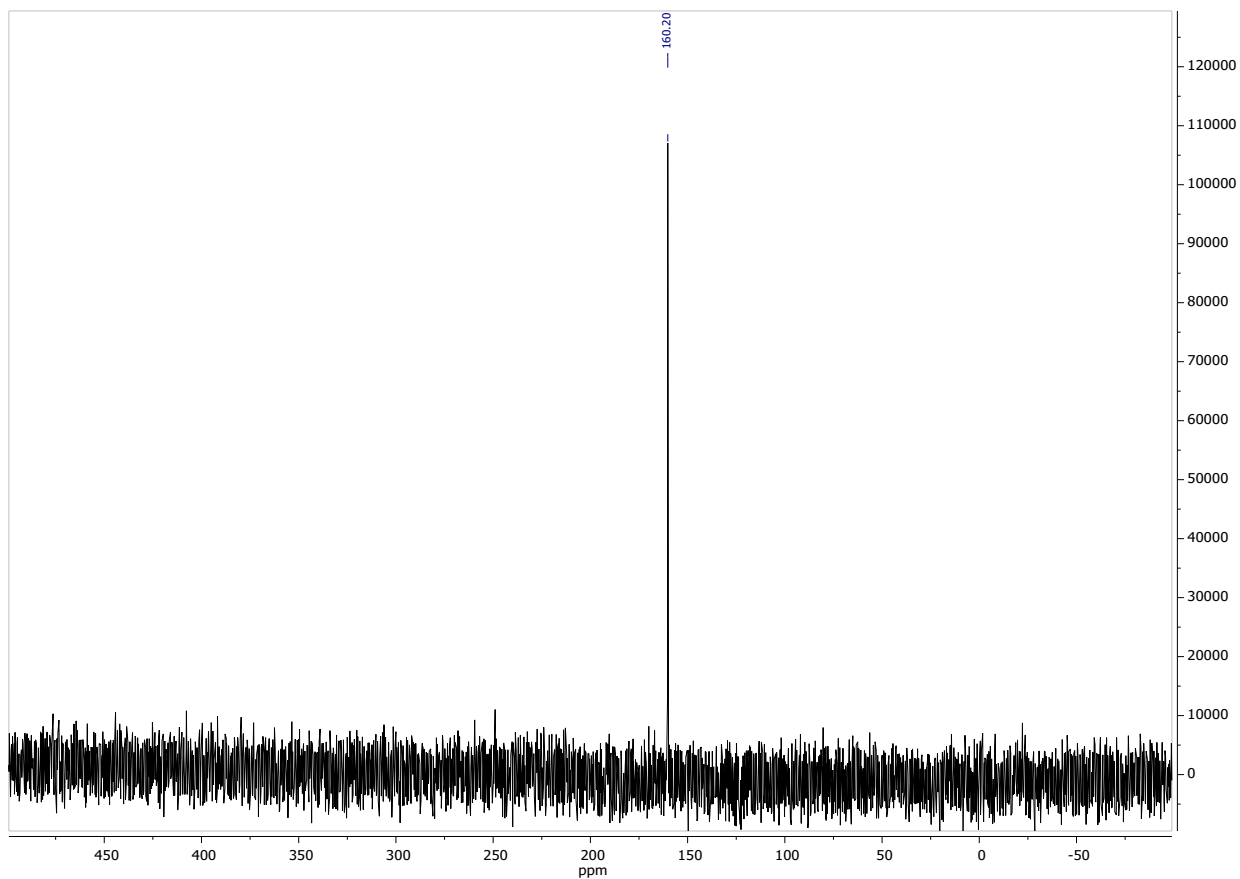

**Figure-61:**  $^{13}\text{C}$  NMR spectrum (76 MHz) of **4i** in  $\text{DMSO-}d_6$

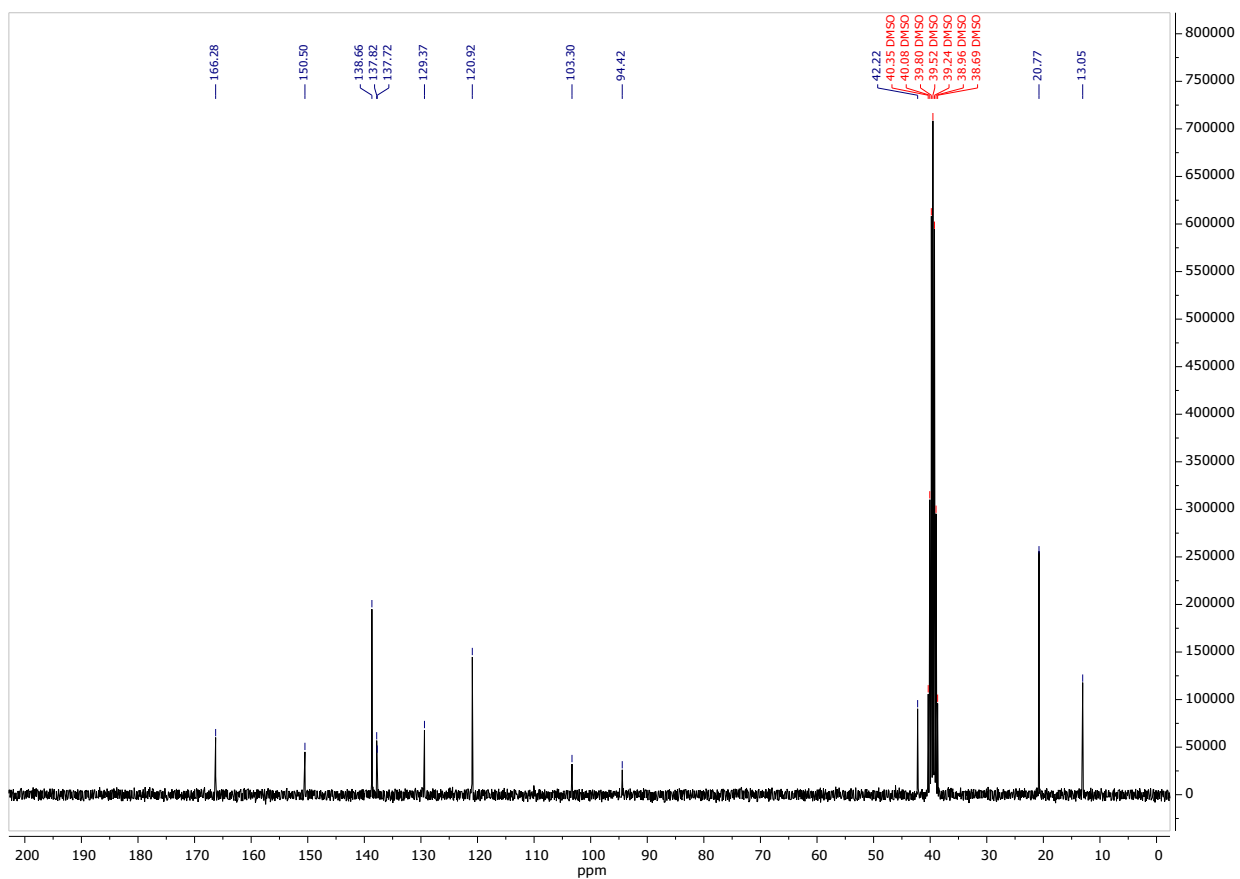

**Figure-62:** HRMS spectrum of compound **4i**

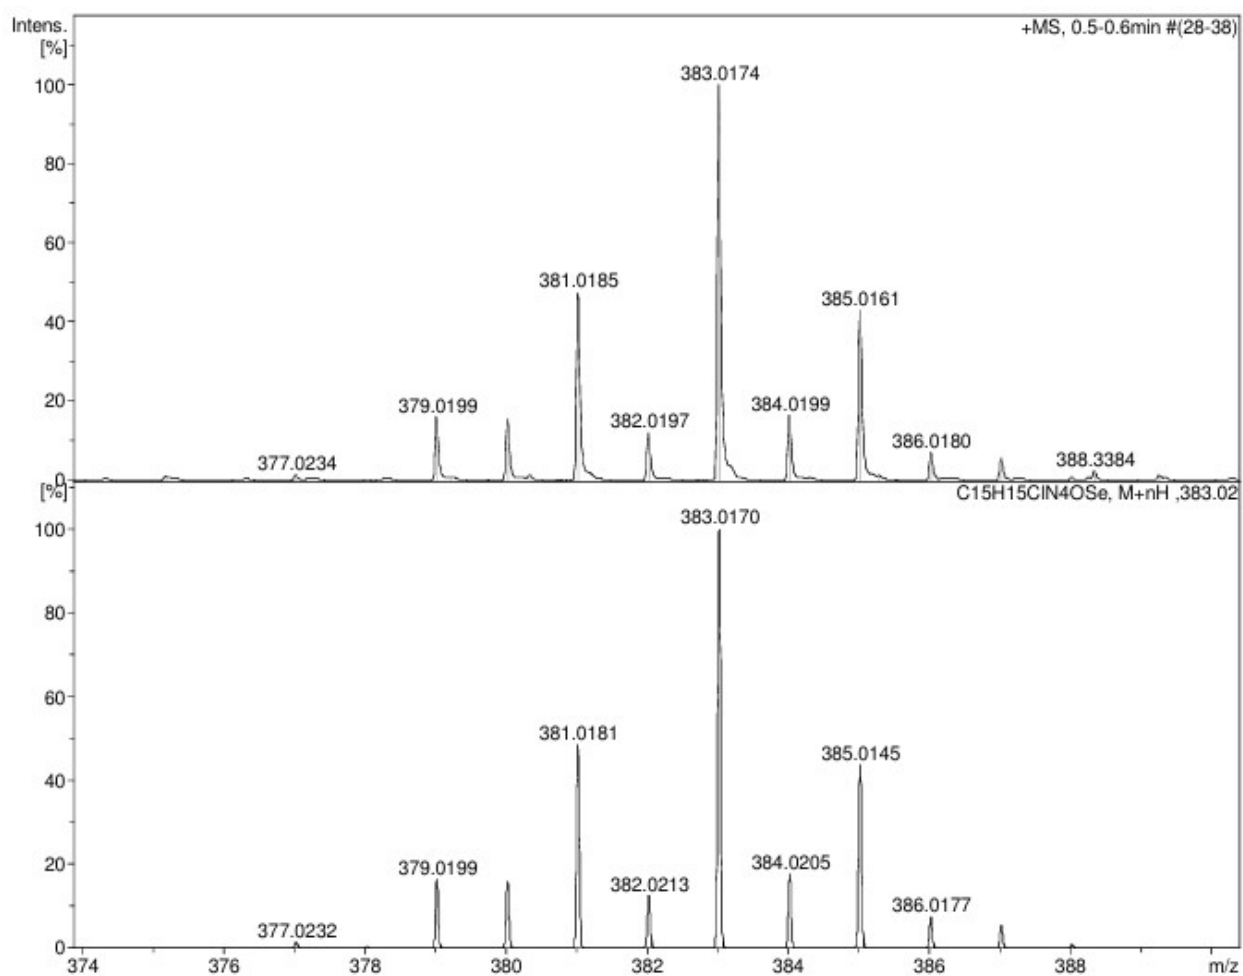

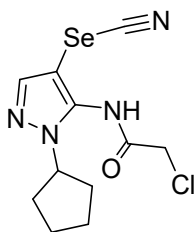

*2-Chloro-N-(1-cyclopentyl-4-selenocyanato-1H-pyrazol-5-yl)acetamide, 4j*

White powder, m.p. 167-169°C, yield 86% (0.57 g)

$^1\text{H}$  NMR (300 MHz,  $\text{DMSO-}d_6$ )  $\delta$  10.63 (s, 1H), 7.72 (s, 1H), 4.70 – 4.60 (m, 1H), 4.41 (s, 2H), 2.06 – 1.94 (m, 2H), 1.89 – 1.75 (m, 4H), 1.66 – 1.54 (m, 2H).  $^{77}\text{Se}$  NMR (57 MHz,  $\text{DMSO}$ )  $\delta$  170.04.  $^{13}\text{C}\{^1\text{H}\}$  NMR (76 MHz,  $\text{DMSO}$ )  $\delta$  166.48, 141.82, 136.86, 104.21, 90.72, 58.61, 42.48, 32.25, 24.21. HRMS (ESI-TOF):  $m/z$   $[\text{M}+\text{H}]^+$ : calcd for  $[\text{C}_{11}\text{H}_{14}\text{ClN}_4\text{OSe}]^+$ : 333.0013; found: 333.0016.

**Figure-63:**  $^1\text{H}$  NMR spectrum (300 MHz) of **4j** in  $\text{DMSO-}d_6$

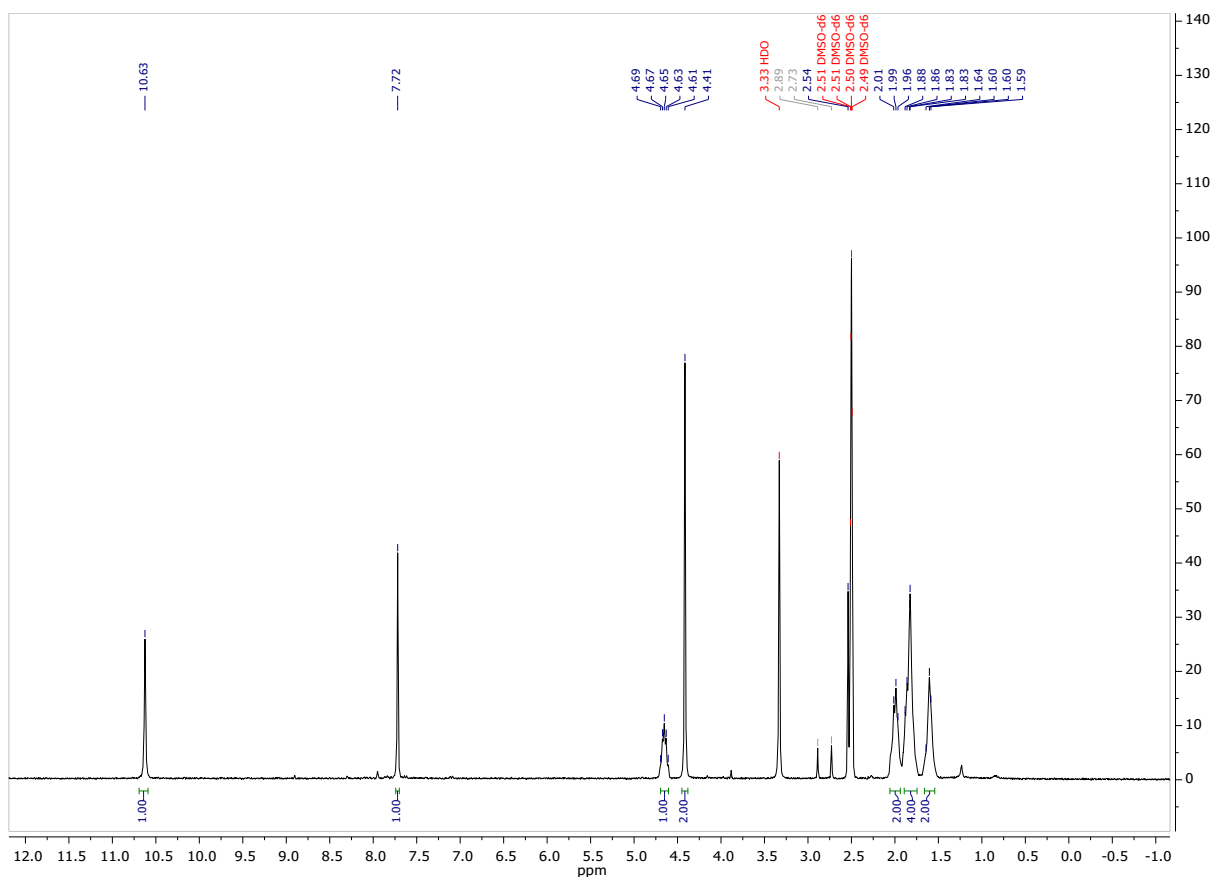

**Figure-64:**  $^{77}\text{Se}$  NMR spectrum (57 MHz) of **4j** in  $\text{DMSO-}d_6$

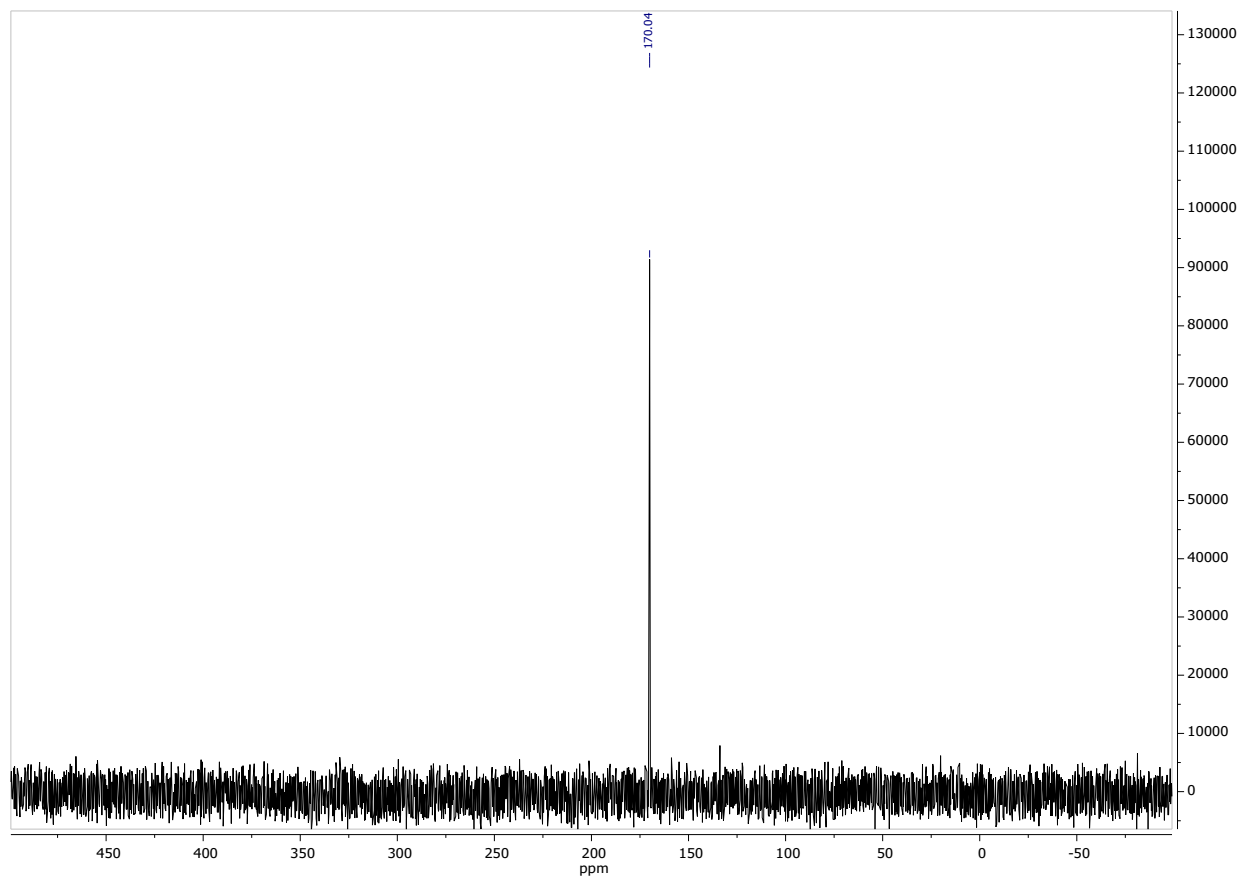

**Figure-65:**  $^{13}\text{C}$  NMR spectrum (76 MHz) of **4j** in  $\text{DMSO-}d_6$

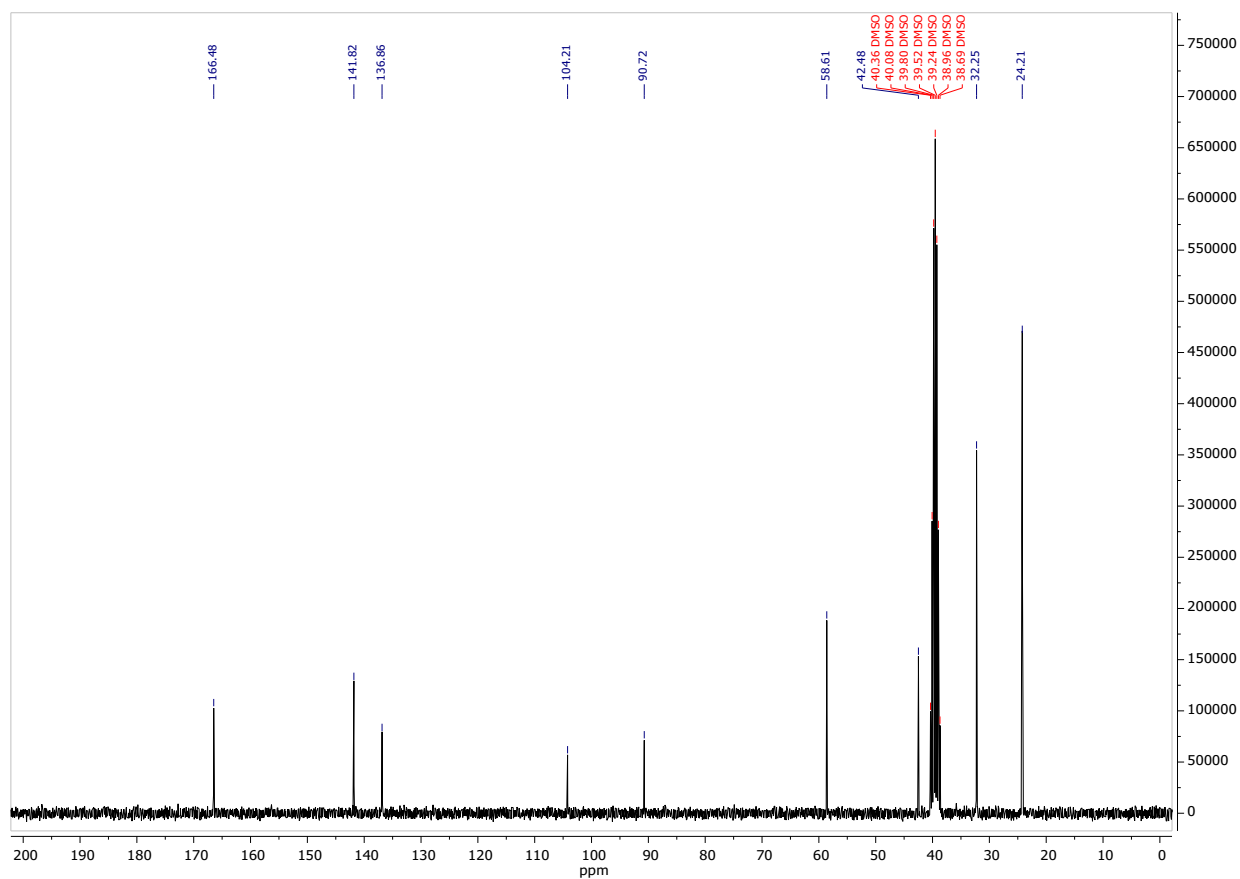

**Figure-66:** HRMS spectrum of compound **4j**

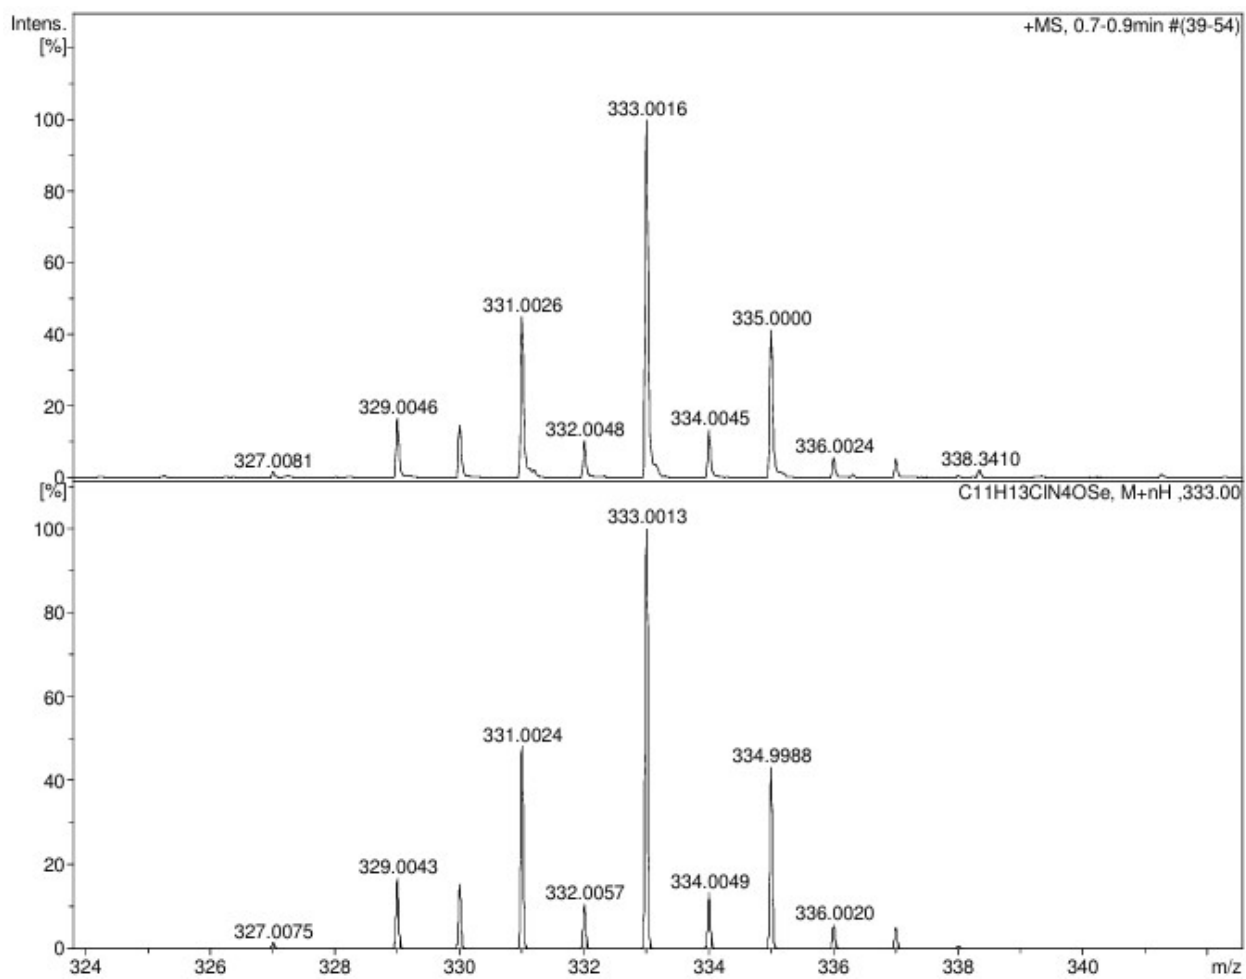

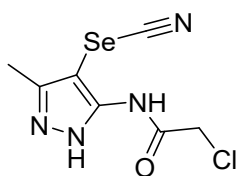

*2-Chloro-N-(3-methyl-4-selenocyanato-1H-pyrazol-5-yl)acetamide, 4I*

White powder, m.p. 221-223°C, yield 65% (0.36 g)

$^1\text{H}$  NMR (300 MHz,  $\text{DMSO-}d_6$ )  $\delta$  10.78 (s, 1H), 4.30 (s, 2H), 2.32 (s, 3H).  $^{77}\text{Se}$  NMR (57 MHz, DMSO)  $\delta$  157.67.  $^{13}\text{C}\{^1\text{H}\}$  NMR (76 MHz, DMSO)  $\delta$  166.44, 145.87, 143.11, 103.83, 88.00, 42.45, 10.85. HRMS (ESI-TOF):  $m/z$   $[\text{M}+\text{H}]^+$ : calcd for  $[\text{C}_7\text{H}_8\text{ClN}_4\text{OSe}]^+$ : 278.9544; found: 278.9545.

**Figure-67:**  $^1\text{H}$  NMR spectrum (300 MHz) of **4I** in  $\text{DMSO-}d_6$

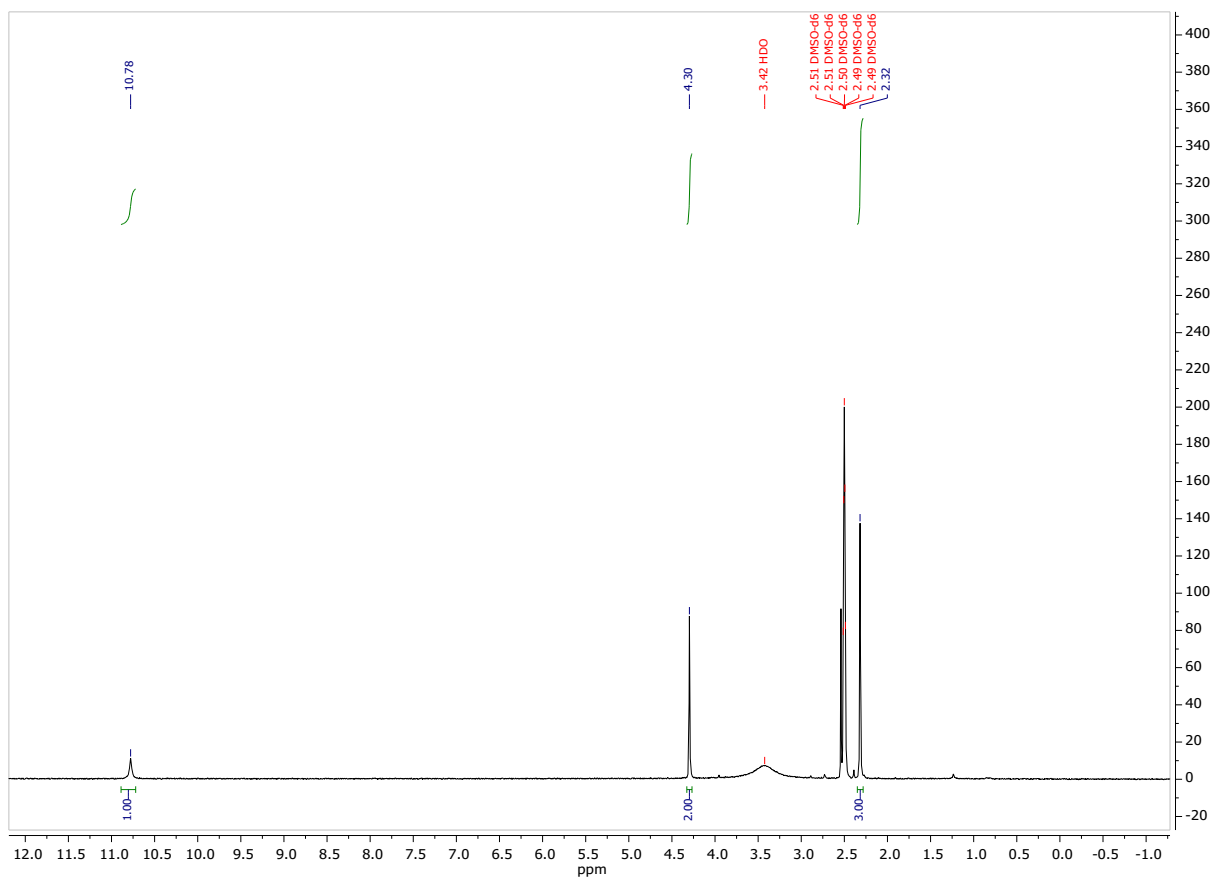

**Figure-68:**  $^{77}\text{Se}$  NMR spectrum (57 MHz) of **4l** in  $\text{DMSO-}d_6$

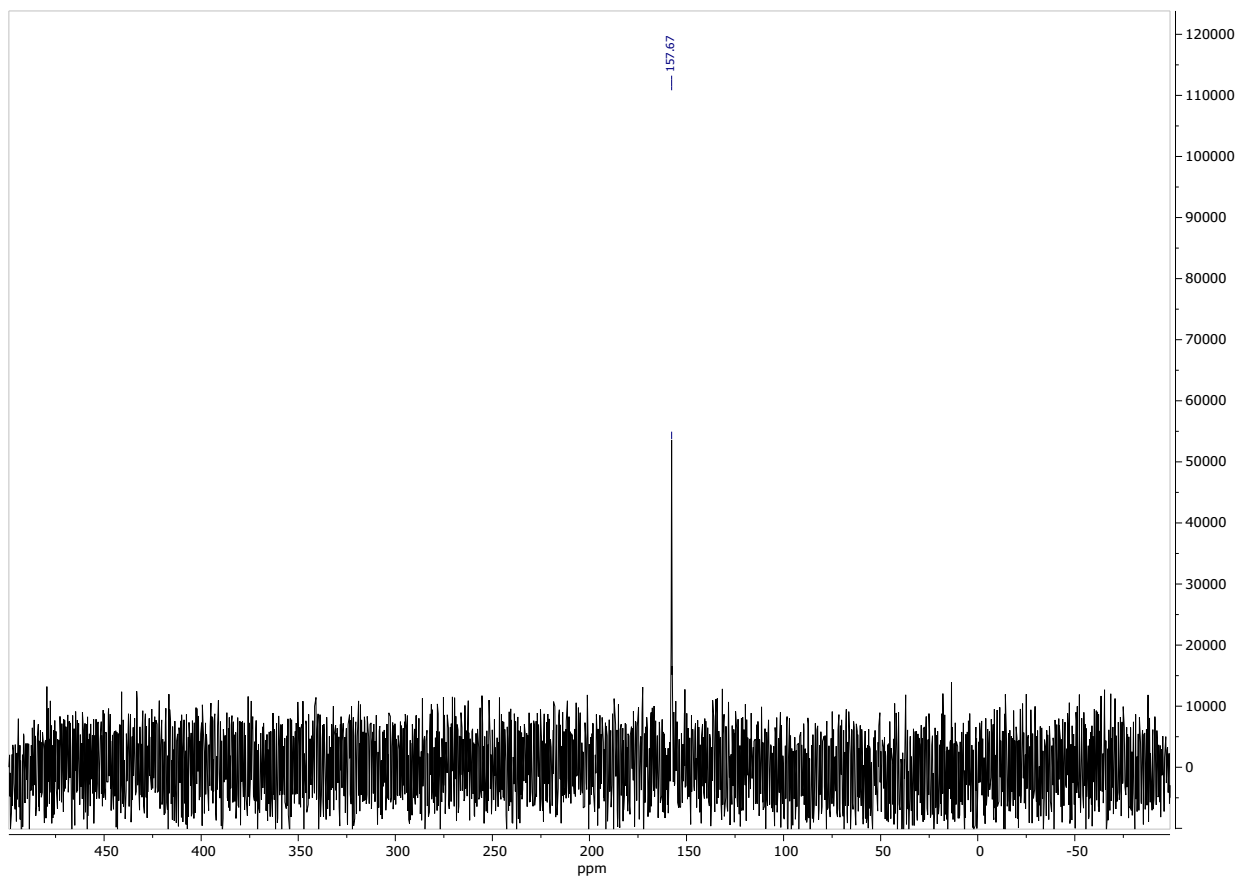

**Figure-69:**  $^{13}\text{C}$  NMR spectrum (76 MHz) of **4l** in  $\text{DMSO-}d_6$

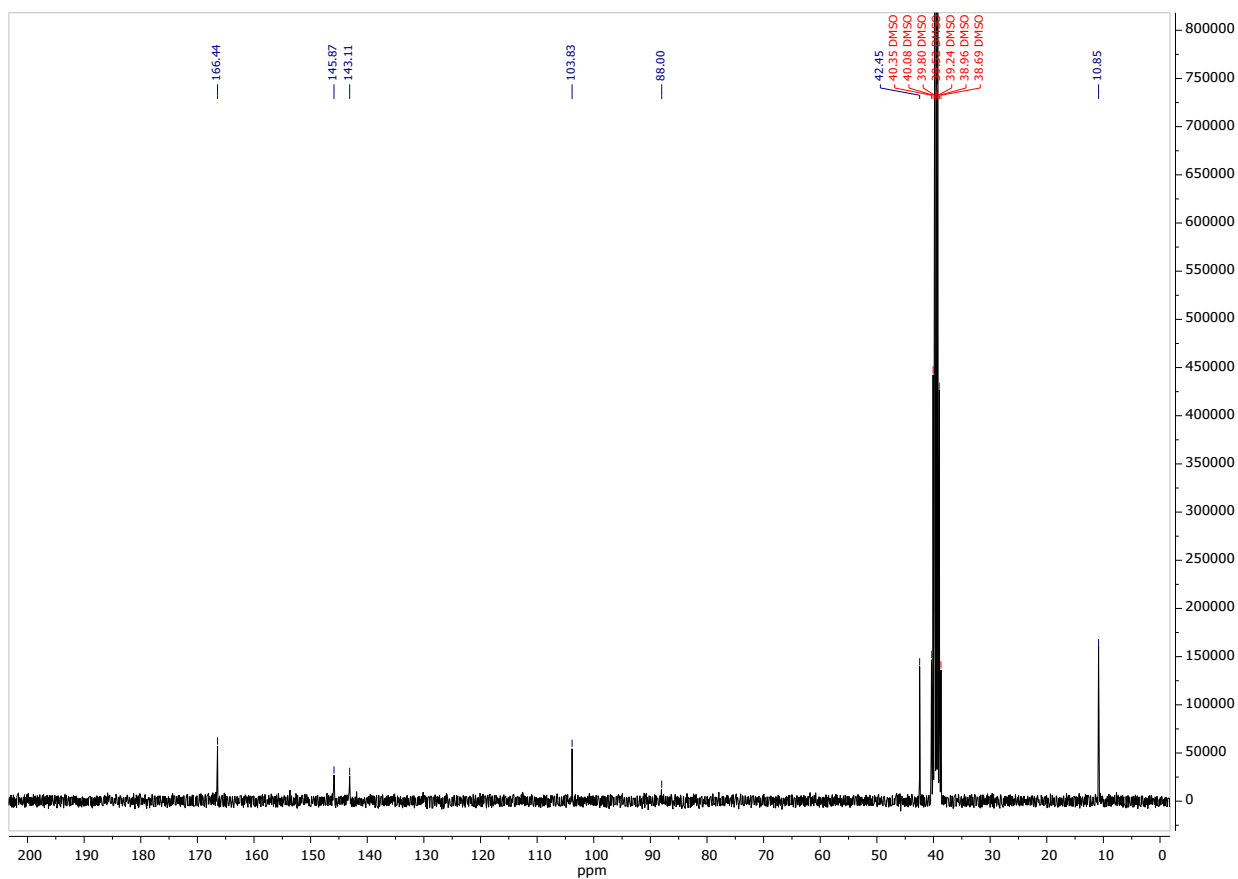

**Figure-70:** HRMS spectrum of compound **4I**

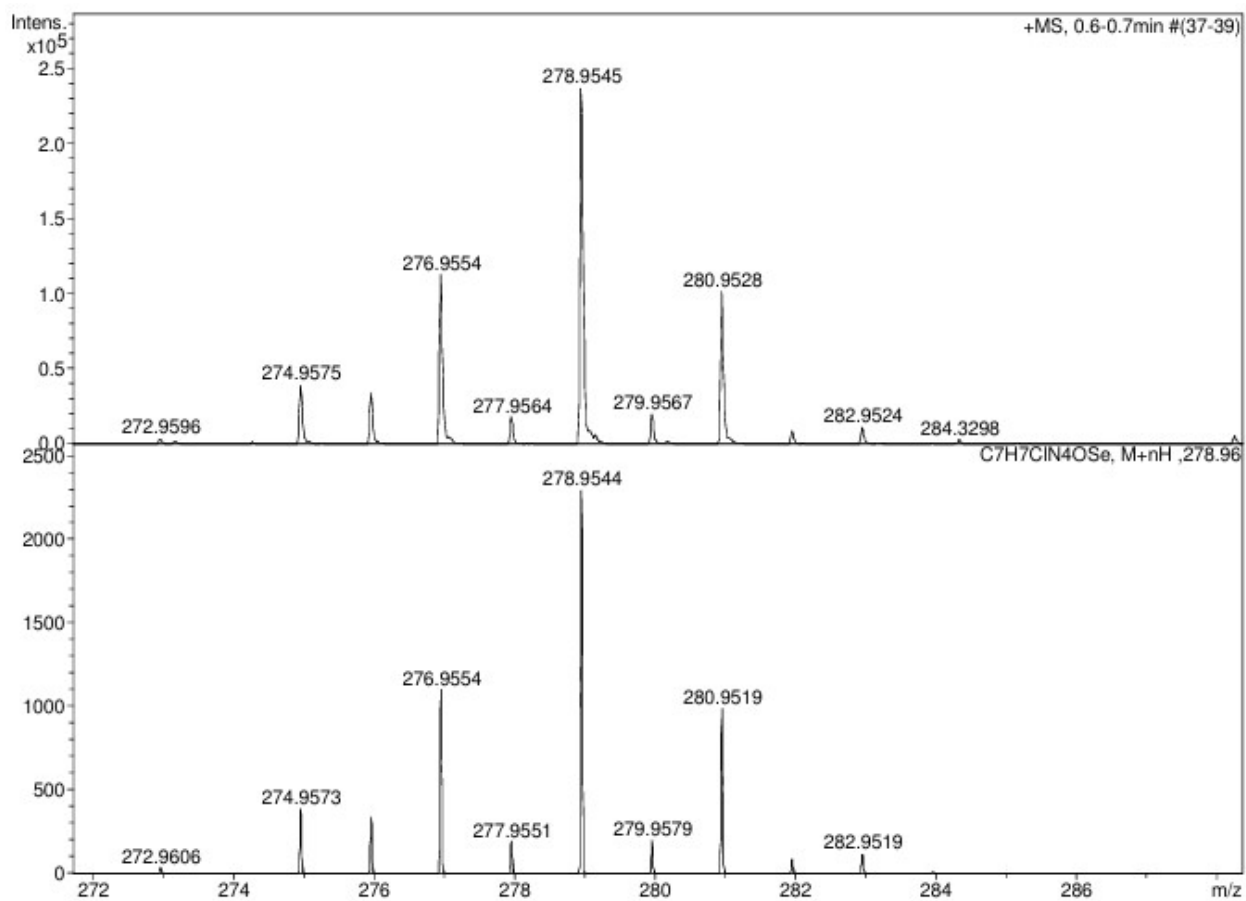

## NMR and HRMS spectra for compound 5

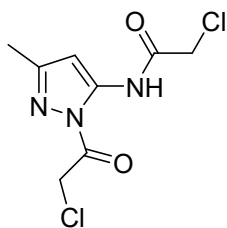

### *2-Chloro-N-(1-(2-chloroacetyl)-3-methyl-1H-pyrazol-5-yl)acetamide, 5*

White powder, m.p. 153-155°C, yield 53% (0.53 g)

$^1\text{H}$  NMR (300 MHz,  $\text{DMSO-}d_6$ )  $\delta$  11.21 (s, 1H), 6.77 (s, 1H), 5.04 (s, 2H), 4.28 (s, 2H), 2.53 (s, 3H).  $^{13}\text{C}\{^1\text{H}\}$  NMR (76 MHz,  $\text{DMSO}$ )  $\delta$  165.91, 165.20, 149.26, 144.42, 104.07, 43.87, 42.88, 14.08. HRMS (ESI-TOF):  $m/z$   $[\text{M}+\text{H}]^+$ : calcd for  $[\text{C}_8\text{H}_{10}\text{Cl}_2\text{N}_3\text{O}_2]^+$ : 271.9964; found: 271.9971.

**Figure-71:**  $^1\text{H}$  NMR spectrum (300 MHz) of **5** in  $\text{DMSO-}d_6$

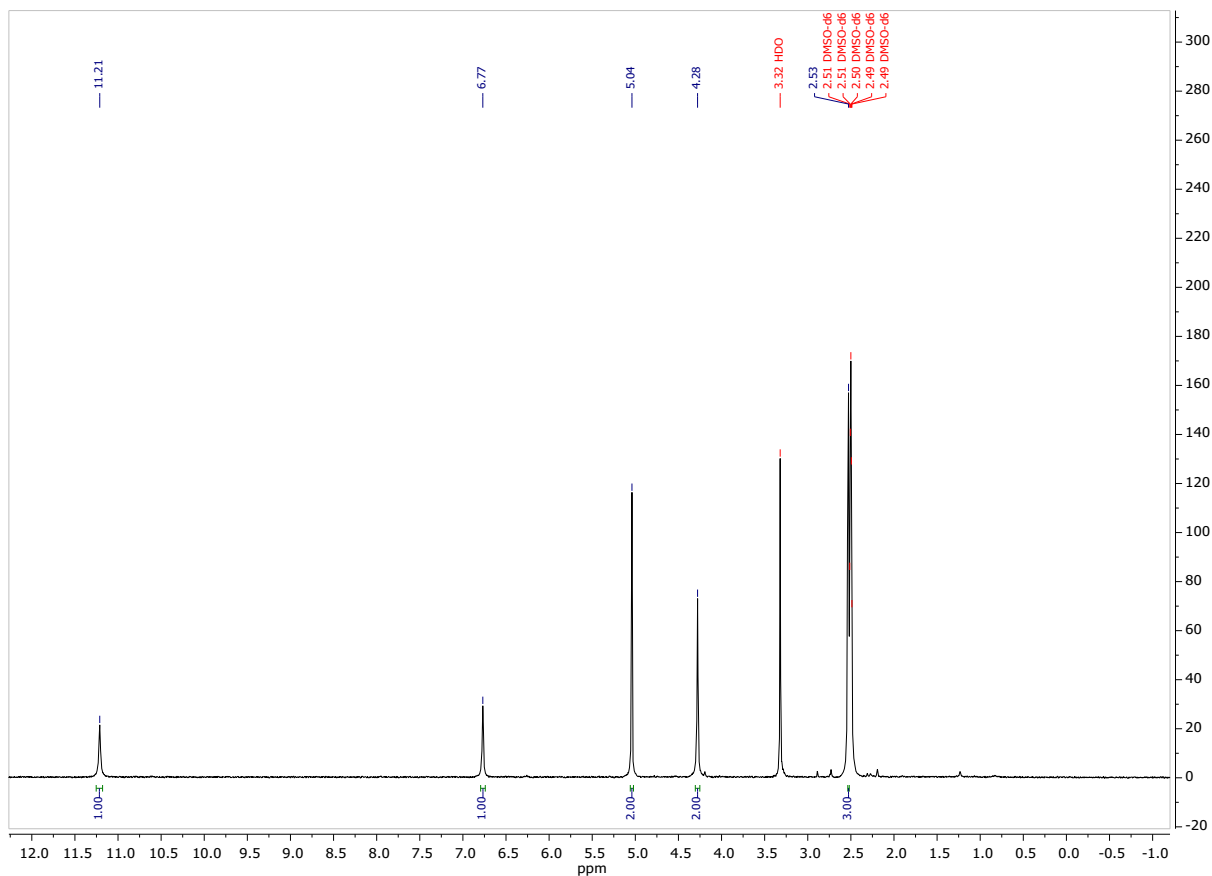

**Figure-72:**  $^{13}\text{C}$  NMR spectrum (76 MHz) of **5** in  $\text{DMSO-}d_6$

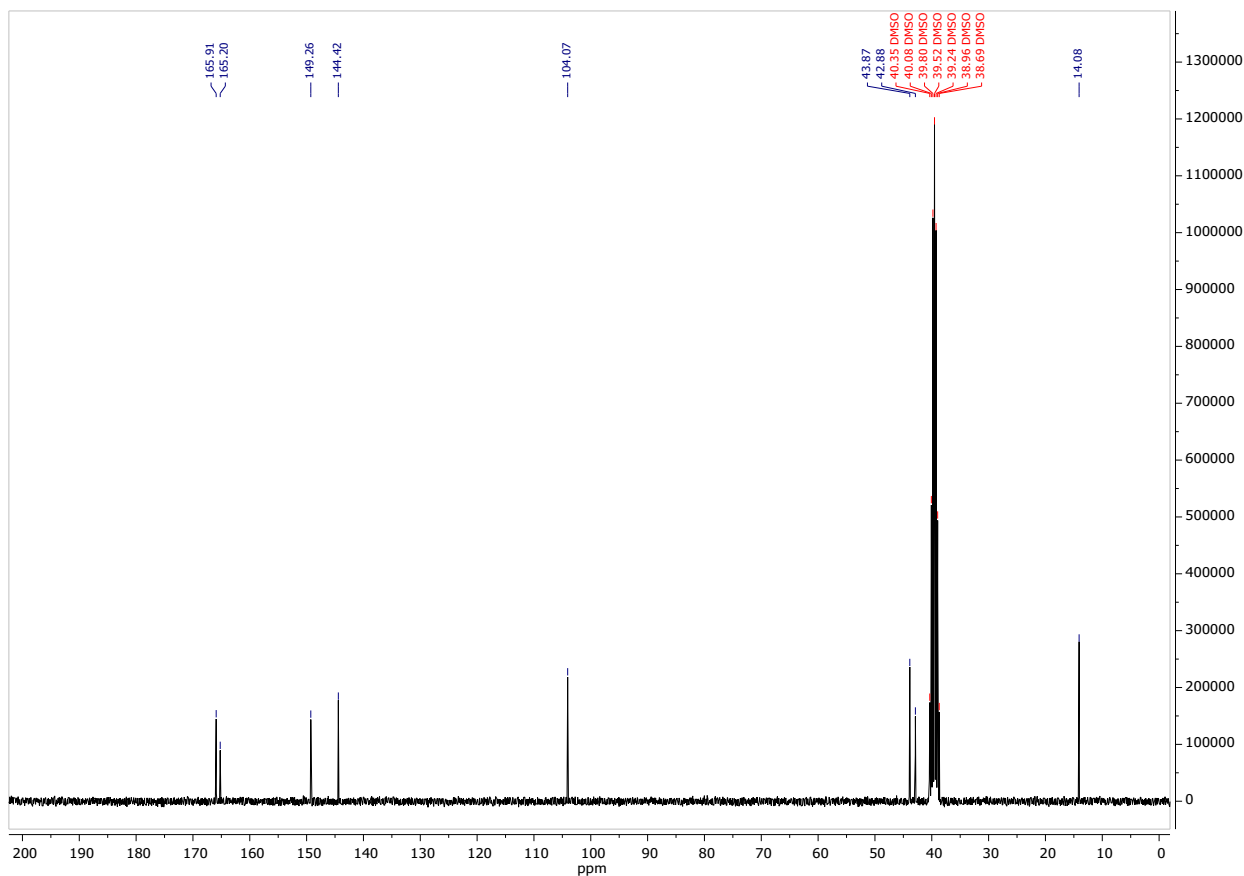

**Figure-73:** HRMS spectrum of compound **5**

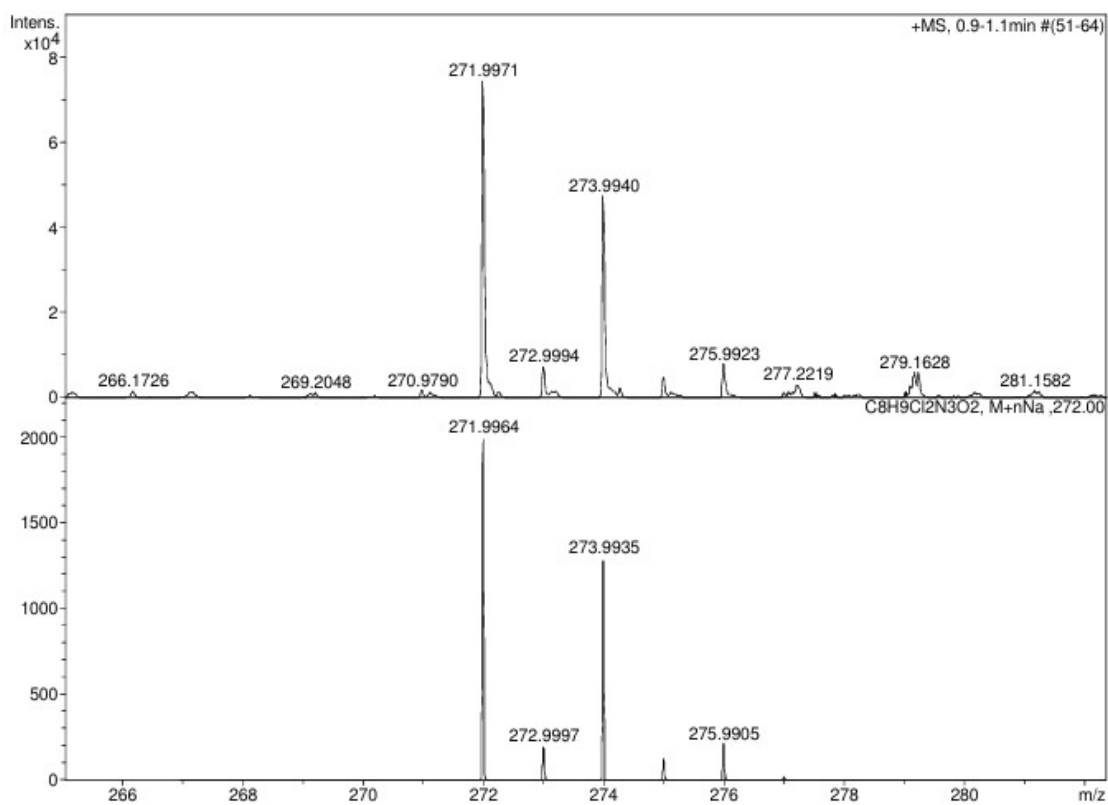

## NMR and HRMS spectra for compound 6

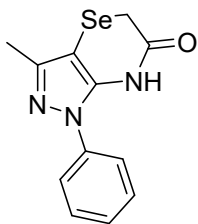

### *3-Methyl-1-phenyl-1,7-dihydropyrazolo[4,3-b][1,4]selenazin-6(5H)-one, 6a*

Pale yellow powder, m.p. 124-126°C, yield 77% (0.09 g)

$^1\text{H}$  NMR (300 MHz,  $\text{DMSO-}d_6$ )  $\delta$  10.56 (s, 1H), 7.55 – 7.46 (m, 4H), 7.39 – 7.32 (m, 1H), 3.41 (s, 2H), 2.15 (s, 3H).  $^{77}\text{Se}$  NMR (57 MHz, DMSO)  $\delta$  86.21.  $^{13}\text{C}\{^1\text{H}\}$  NMR (76 MHz, DMSO)  $\delta$  166.30, 145.99, 138.71, 138.18, 129.20, 127.01, 122.64, 89.15, 22.45, 12.96. HRMS (ESI-TOF):  $m/z$   $[\text{M}+\text{H}]^+$ : calcd for  $[\text{C}_{12}\text{H}_{12}\text{N}_3\text{OSe}]^+$ : 294.0140; found: 294.0145.

**Figure-74:**  $^1\text{H}$  NMR spectrum (300 MHz) of **6a** in  $\text{DMSO-}d_6$

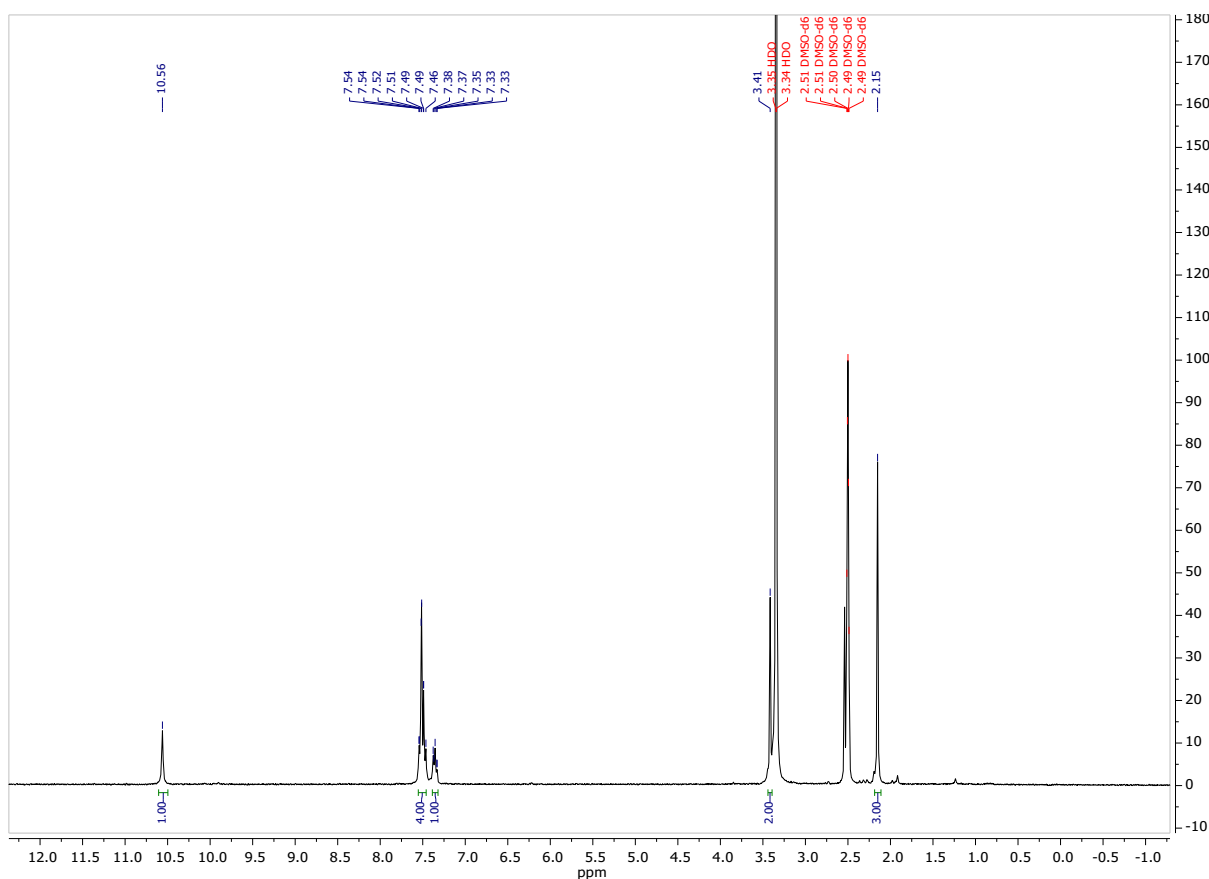

**Figure-75:**  $^{77}\text{Se}$  NMR spectrum (57 MHz) of **6a** in  $\text{DMSO-}d_6$

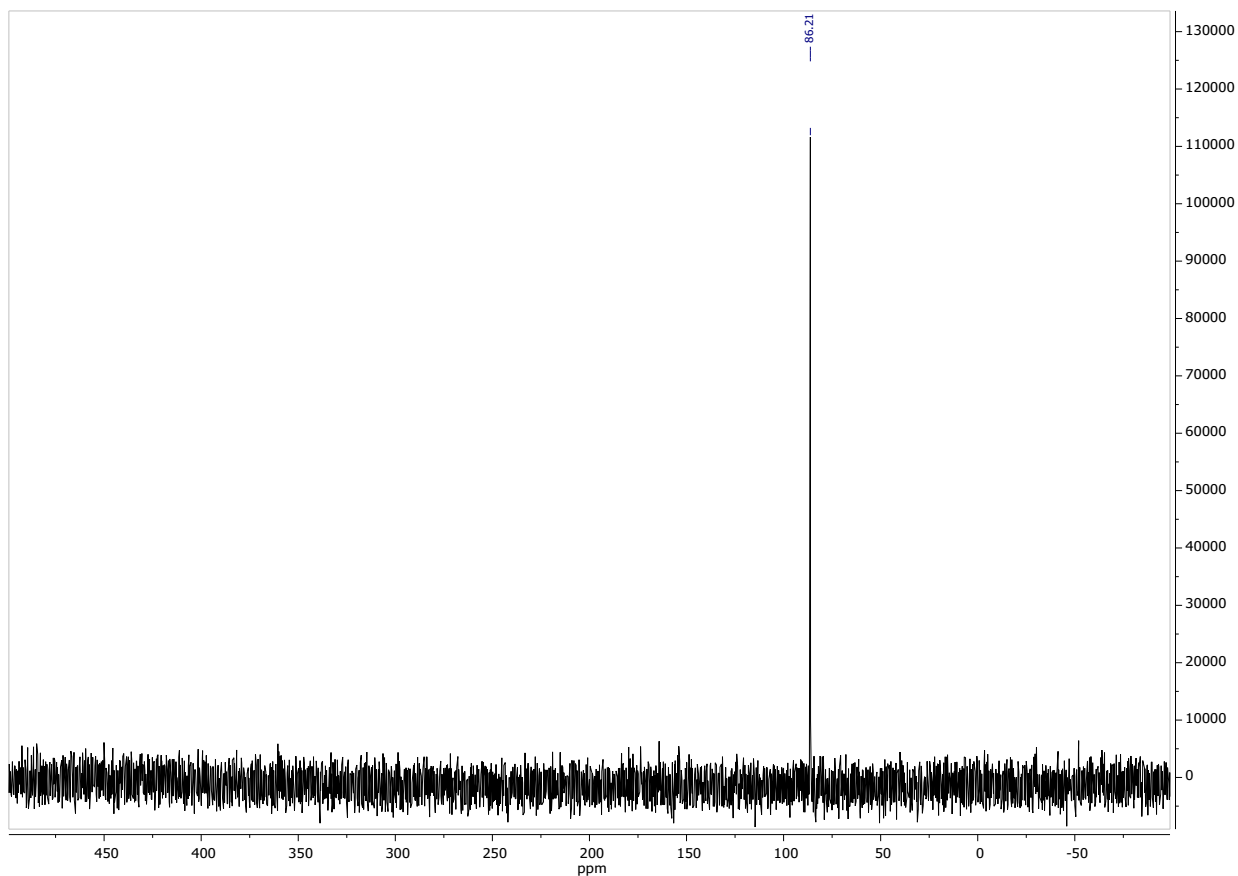

**Figure-76:**  $^{13}\text{C}$  NMR spectrum (76 MHz) of **6a** in  $\text{DMSO-}d_6$

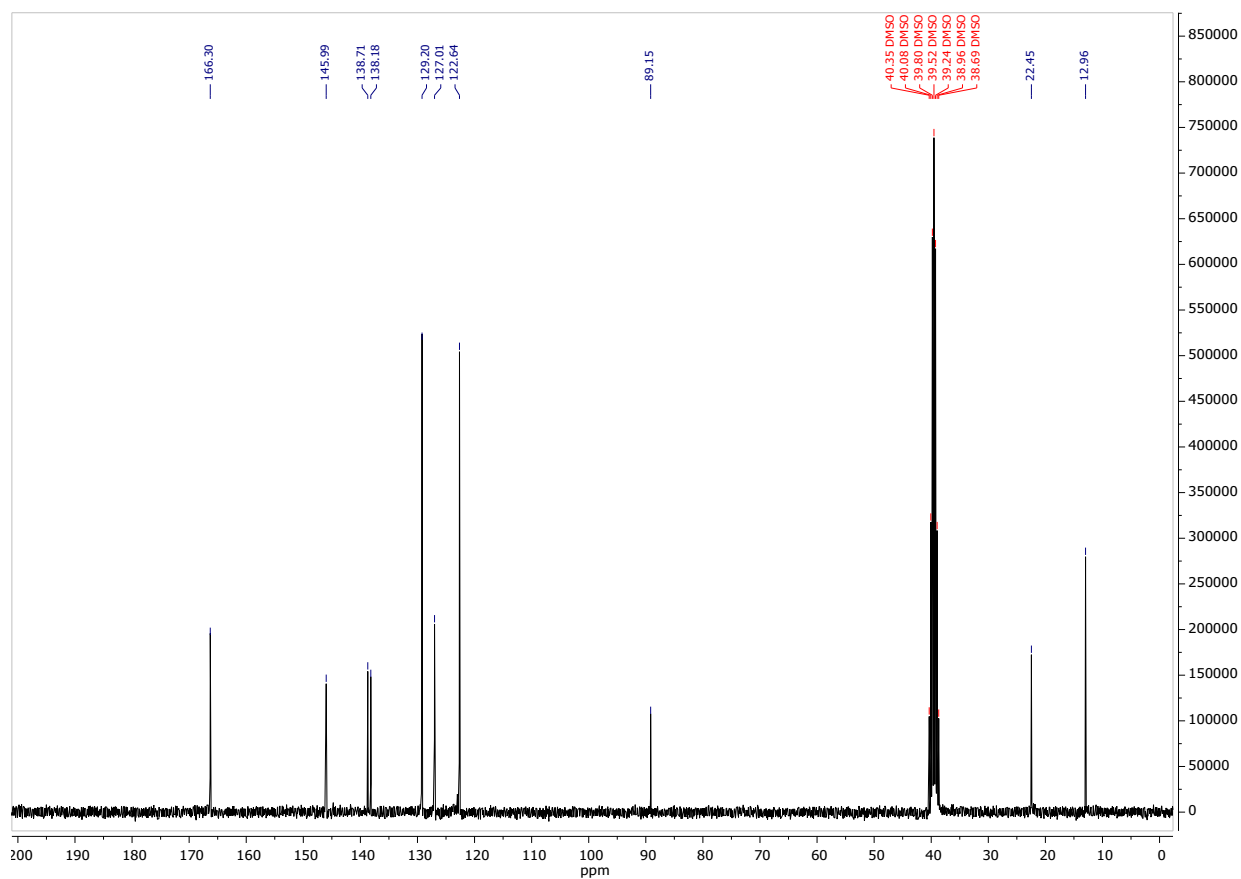

**Figure-77:** HRMS spectrum of compound **6a**

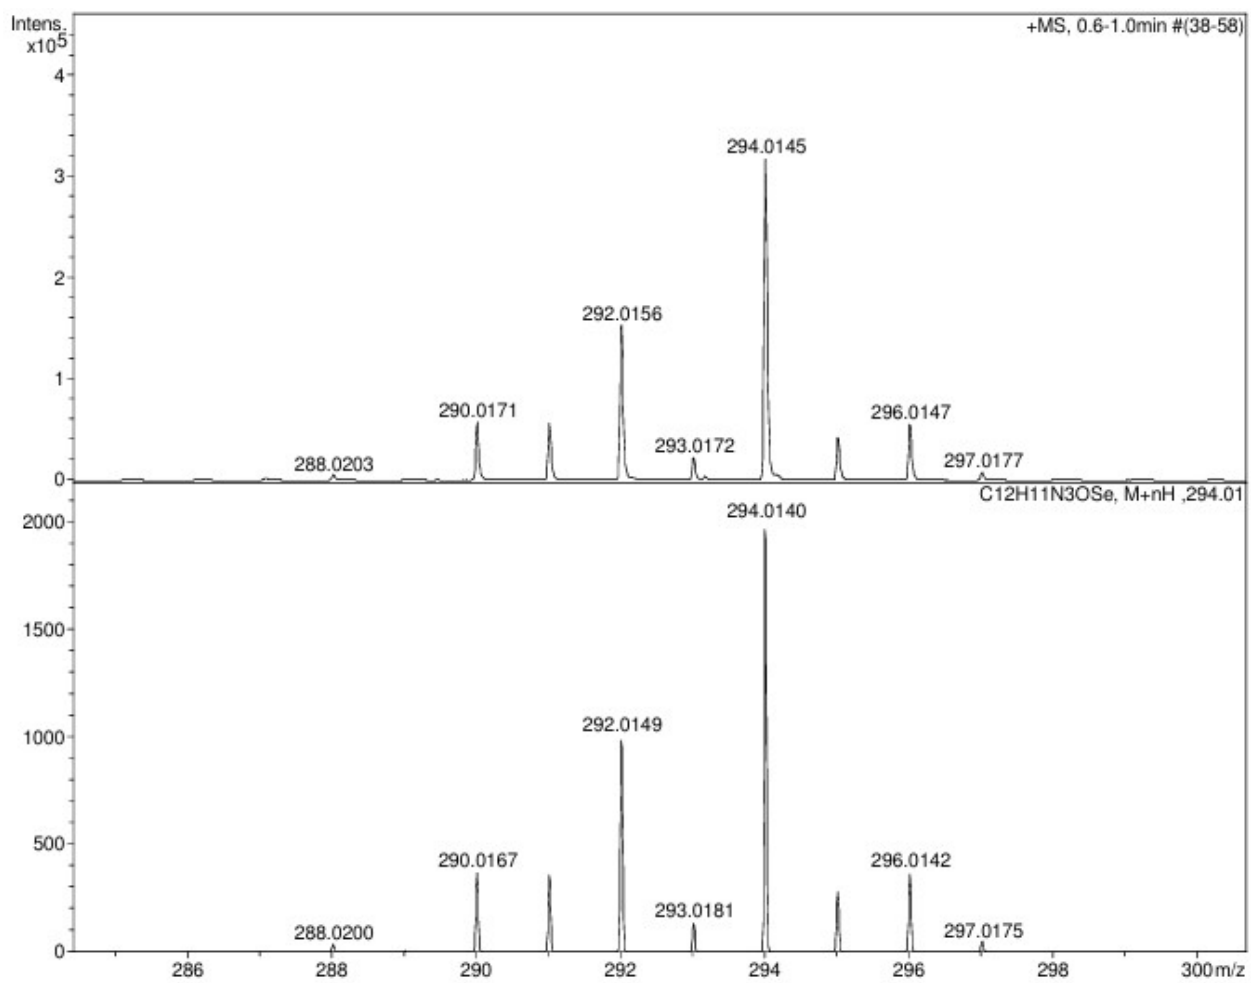

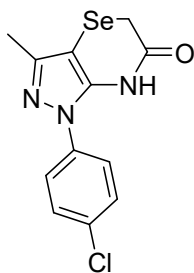

*1-(4-Chlorophenyl)-3-methyl-1,7-dihydropyrazolo[4,3-b][1,4]selenazin-6(5H)-one, 6b*

White powder, m.p. 118-120°C, yield 87% (0.11 g)

$^1\text{H}$  NMR (300 MHz, DMSO- $d_6$ )  $\delta$  10.61 (s, 1H), 7.55 (s, 4H), 3.42 (s, 2H), 2.15 (s, 3H).  $^{77}\text{Se}$  NMR (57 MHz, DMSO)  $\delta$  87.48.  $^{13}\text{C}\{^1\text{H}\}$  NMR (76 MHz, DMSO)  $\delta$  166.24, 146.34, 138.76, 136.94, 131.19, 129.13, 124.29, 89.38, 22.34, 12.93. HRMS (ESI-TOF):  $m/z$   $[\text{M}+\text{H}]^+$ : calcd for  $[\text{C}_{12}\text{H}_{11}\text{ClN}_3\text{OSe}]^+$ : 327.9748; found: 327.9744.

**Figure-78:**  $^1\text{H}$  NMR spectrum (300 MHz) of **6b** in DMSO- $d_6$

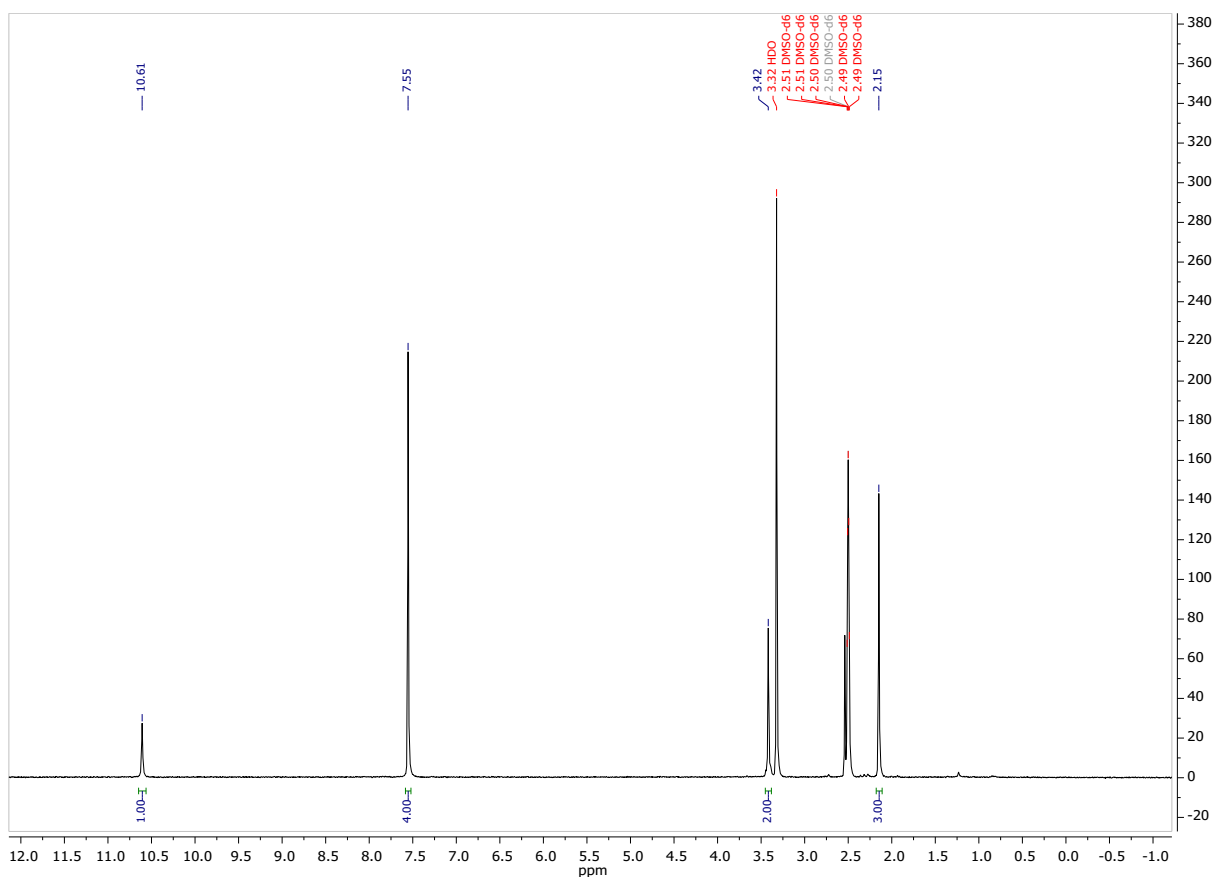

**Figure-79:**  $^{77}\text{Se}$  NMR spectrum (57 MHz) of **6b** in  $\text{DMSO-}d_6$

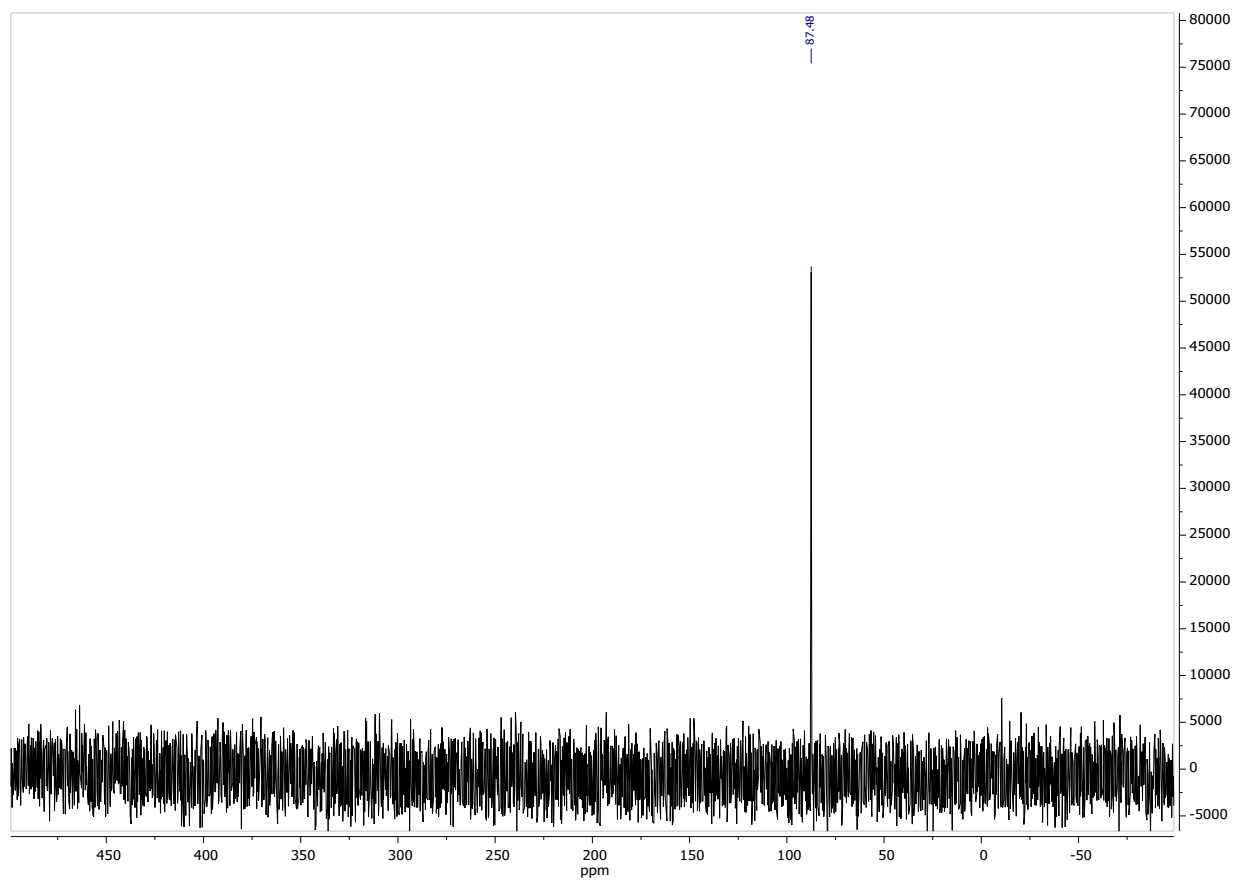

**Figure-80:**  $^{13}\text{C}$  NMR spectrum (76 MHz) of **6b** in  $\text{DMSO-}d_6$

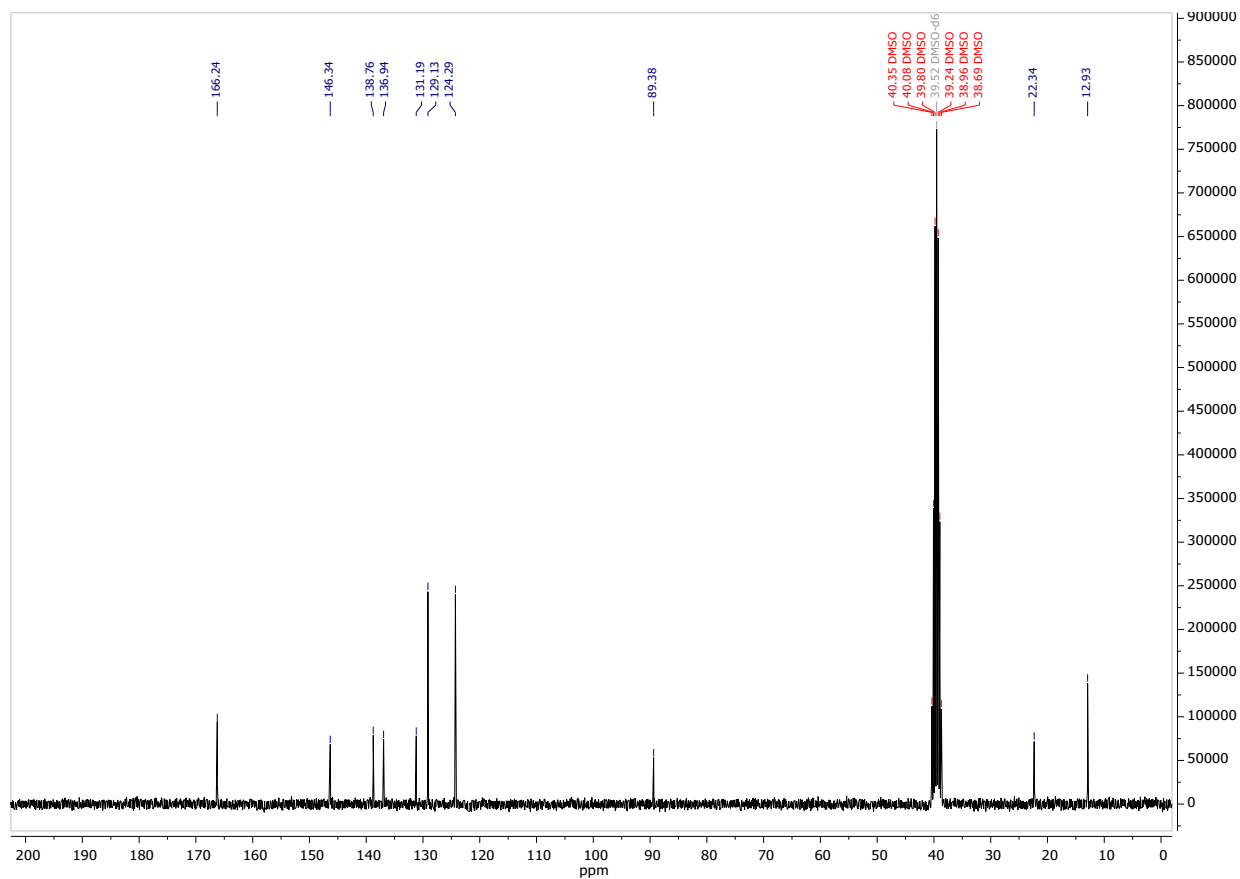

**Figure-81:** HRMS spectrum of compound **6b**

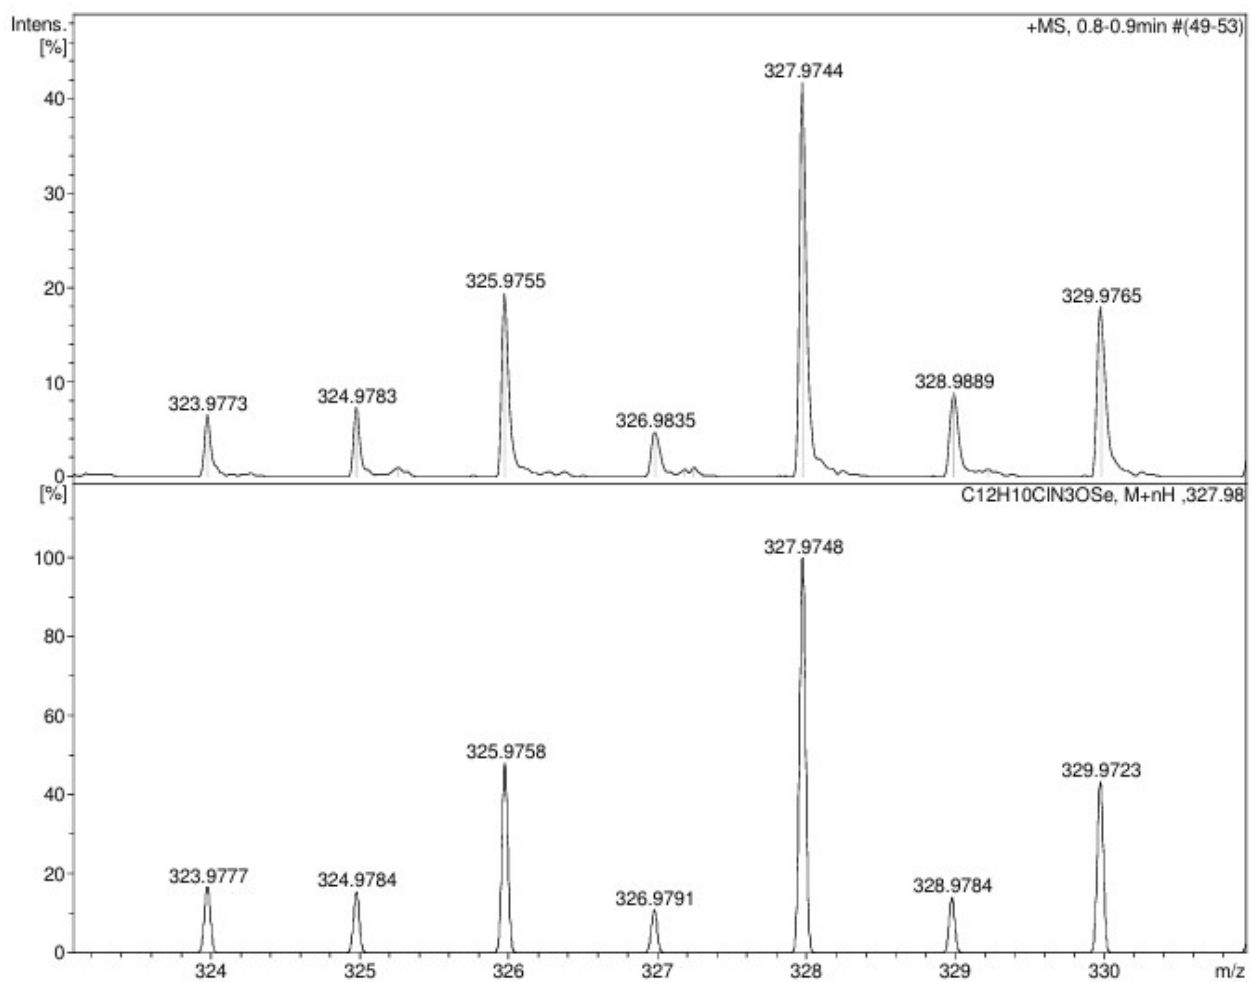

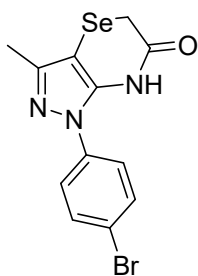

*1-(4-Bromophenyl)-3-methyl-1,7-dihydropyrazolo[4,3-b][1,4]selenazin-6(5H)-one, 6c*

White powder, m.p. 127-129°C, yield 78% (0.12 g)

$^1\text{H}$  NMR (300 MHz, DMSO- $d_6$ )  $\delta$  10.60 (s, 1H), 7.68 (d,  $J = 8.8$  Hz, 2H), 7.48 (d,  $J = 8.8$  Hz, 2H), 3.40 (s, 2H), 2.14 (s, 3H).  $^{77}\text{Se}$  NMR (57 MHz, DMSO)  $\delta$  88.03.  $^{13}\text{C}\{^1\text{H}\}$  NMR (76 MHz, DMSO)  $\delta$  166.42, 146.59, 138.85, 137.43, 132.22, 124.74, 119.74, 89.61, 22.45, 13.05. HRMS (ESI-TOF):  $m/z$   $[\text{M}+\text{H}]^+$ : calcd for  $[\text{C}_{12}\text{H}_{11}\text{BrN}_3\text{OSe}]^+$ : 371.9242; found: 371.9241.

**Figure-82:**  $^1\text{H}$  NMR spectrum (300 MHz) of **6c** in DMSO- $d_6$

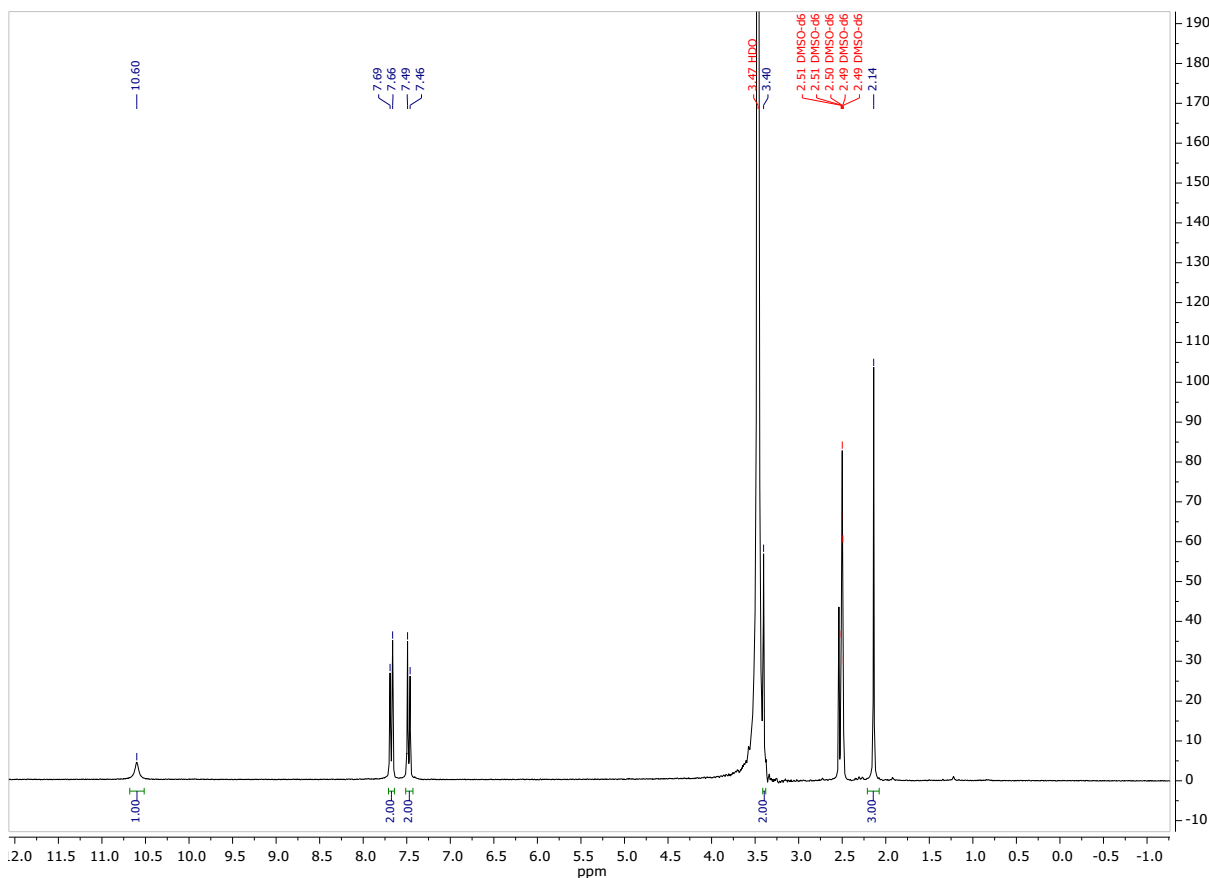

**Figure-73:**  $^{77}\text{Se}$  NMR spectrum (57 MHz) of **6c** in  $\text{DMSO-}d_6$

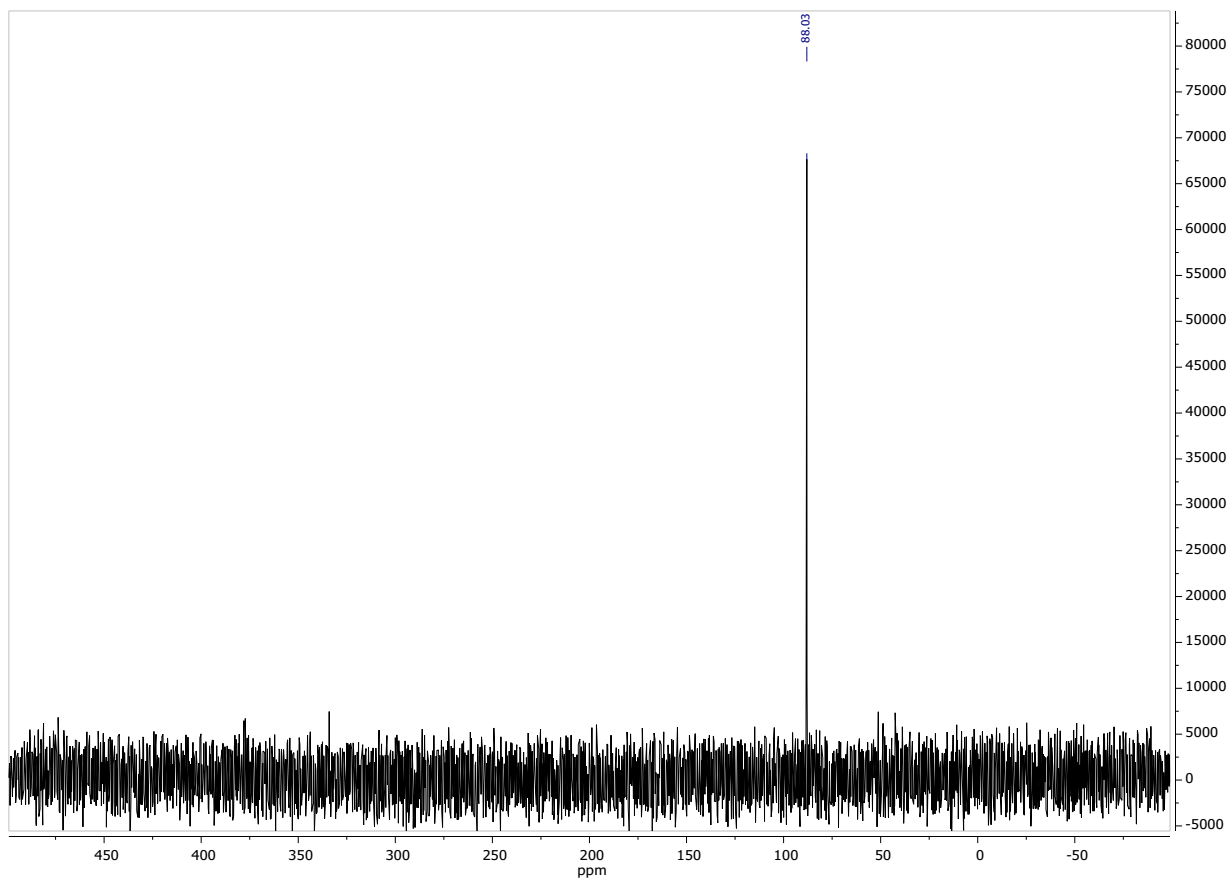

**Figure-84:**  $^{13}\text{C}$  NMR spectrum (76 MHz) of **6c** in  $\text{DMSO-}d_6$

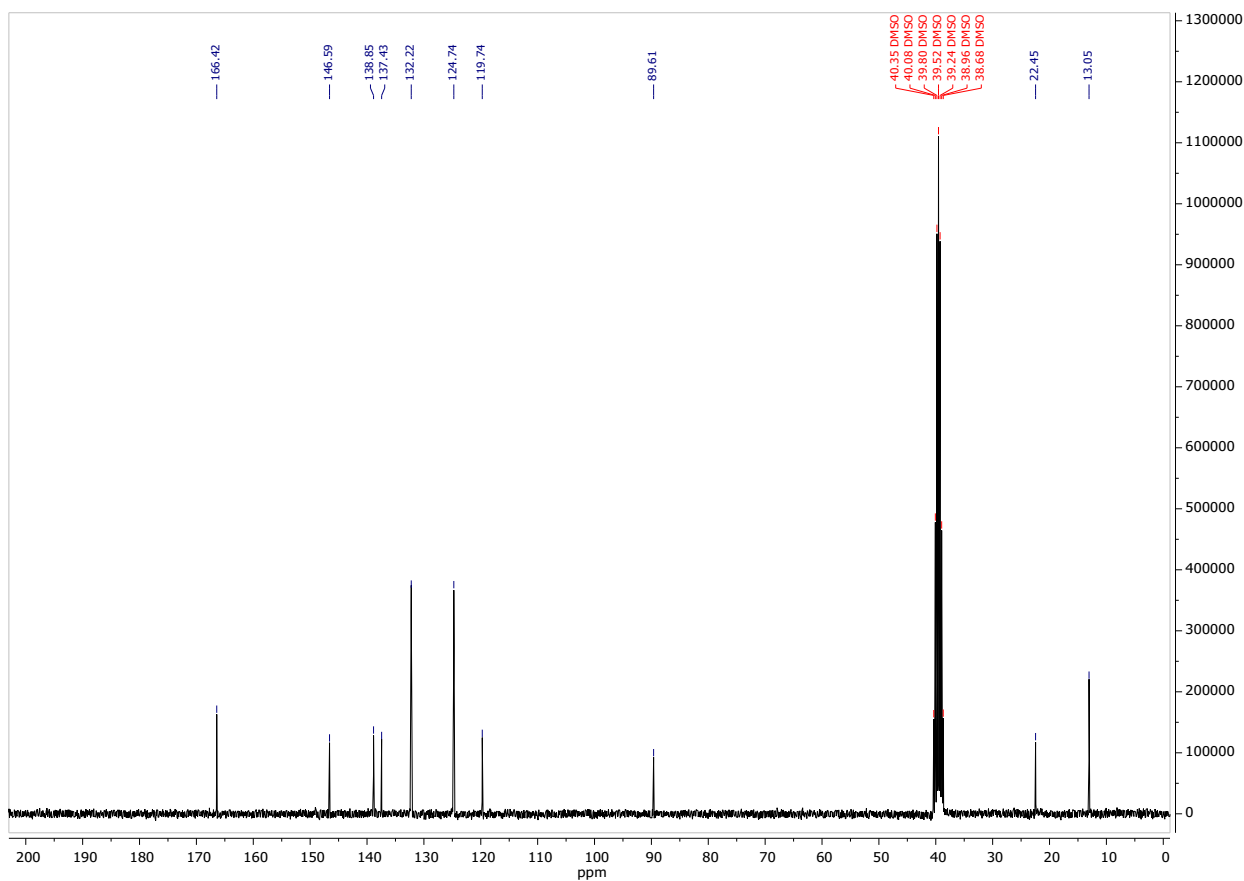

**Figure-85:** HRMS spectrum of compound **6c**

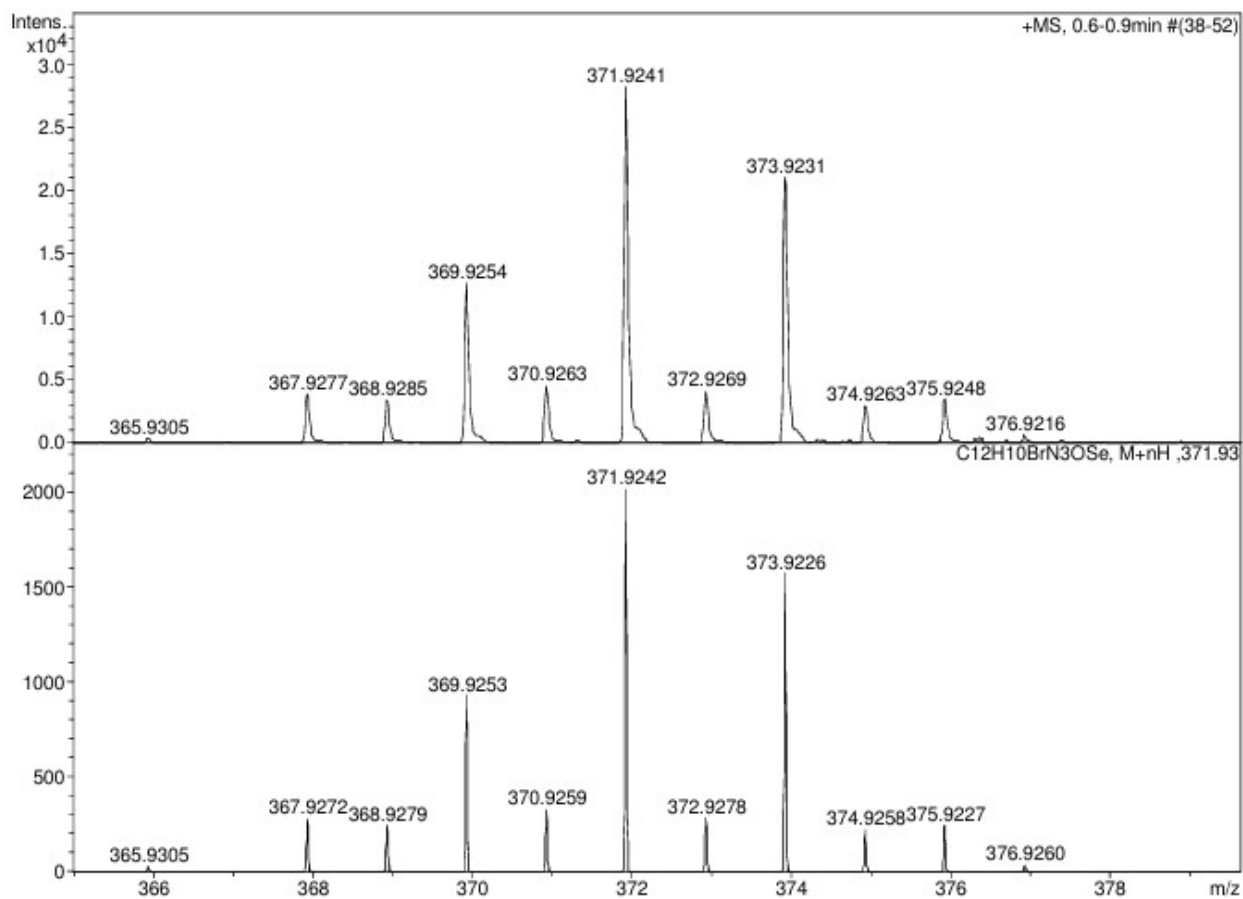

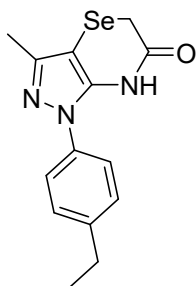

*1-(4-Ethylphenyl)-3-methyl-1,7-dihydropyrazolo[4,3-b][1,4]selenazin-6(5H)-one*, **6d**

White powder, m.p. 100-102°C, yield 81% (0.10 g)

$^1\text{H}$  NMR (300 MHz,  $\text{DMSO-}d_6$ )  $\delta$  10.49 (s, 1H), 7.43 (d,  $J = 8.4$  Hz, 2H), 7.32 (d,  $J = 8.4$  Hz, 2H), 3.40 (s, 2H), 2.65 (q,  $J = 7.6$  Hz, 2H), 2.14 (s, 3H), 1.21 (t,  $J = 7.6$  Hz, 3H).  $^{77}\text{Se}$  NMR (57 MHz, DMSO)  $\delta$  85.78.  $^{13}\text{C}\{^1\text{H}\}$  NMR (76 MHz, DMSO)  $\delta$  166.26, 145.66, 142.69, 138.64, 135.99, 128.42, 122.68, 88.77, 27.73, 22.43, 15.60, 12.93. HRMS (ESI-TOF):  $m/z$   $[\text{M}+\text{H}]^+$ : calcd for  $[\text{C}_{14}\text{H}_{16}\text{N}_3\text{OSe}]^+$ : 322.0453; found: 322.0458.

**Figure-86:**  $^1\text{H}$  NMR spectrum (300 MHz) of **6d** in  $\text{DMSO-}d_6$

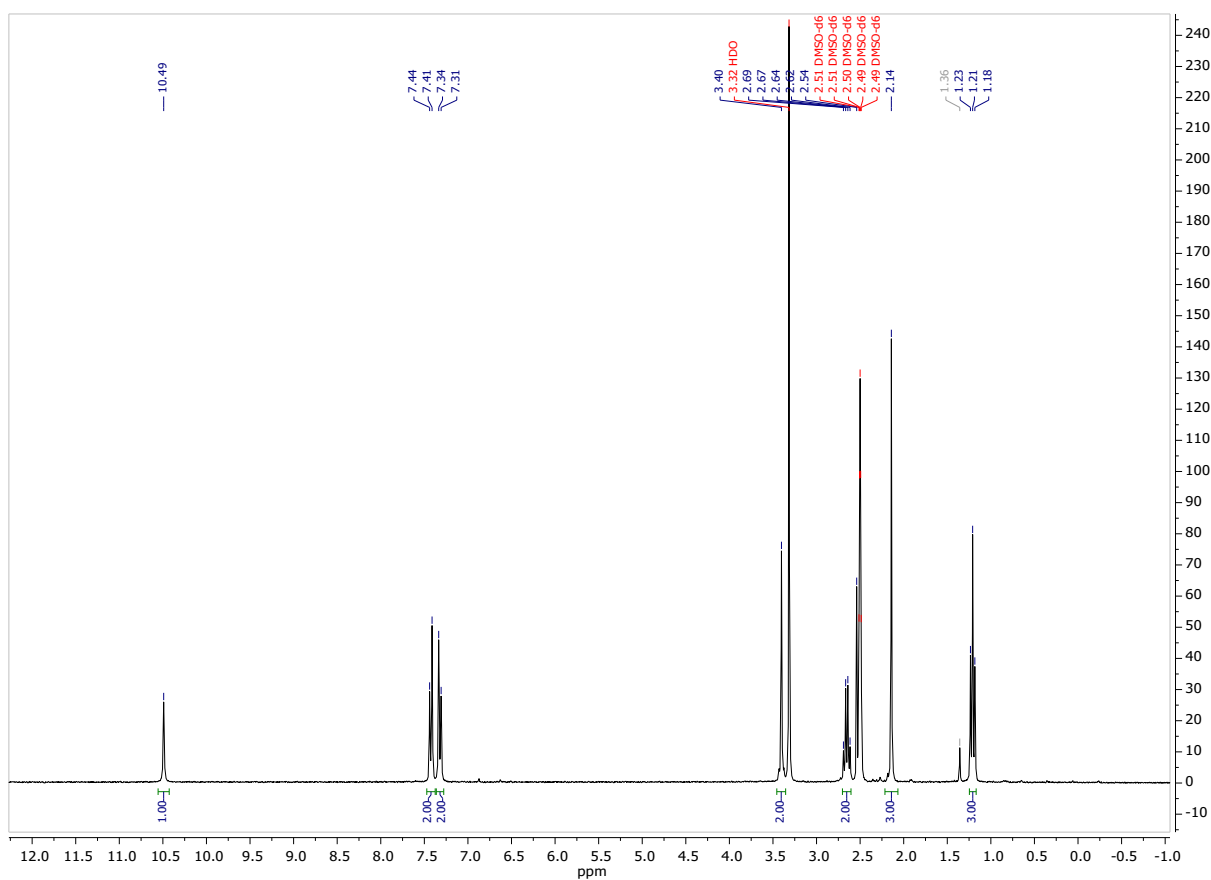

**Figure-87:**  $^{77}\text{Se}$  NMR spectrum (57 MHz) of **6d** in  $\text{DMSO-}d_6$

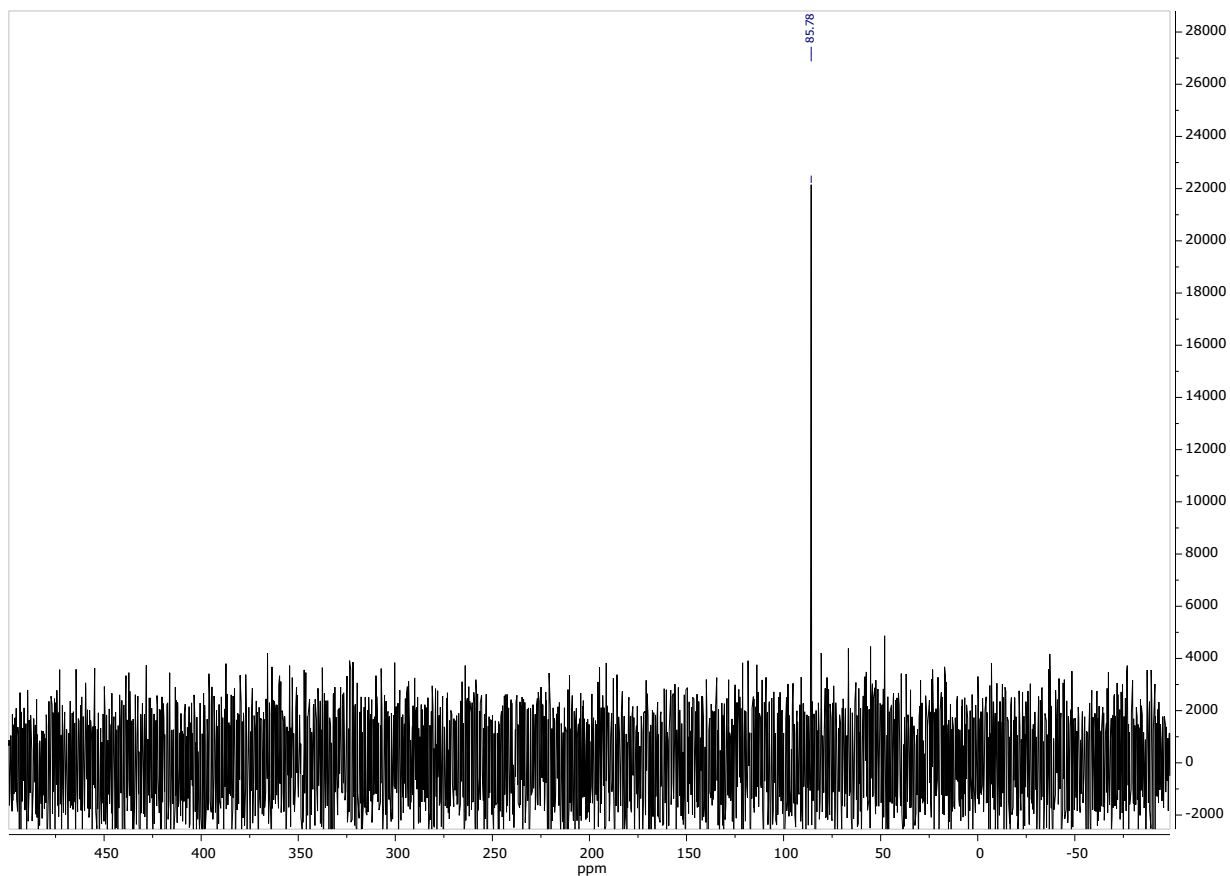

**Figure-88:**  $^{13}\text{C}$  NMR spectrum (76 MHz) of **6d** in  $\text{DMSO-}d_6$

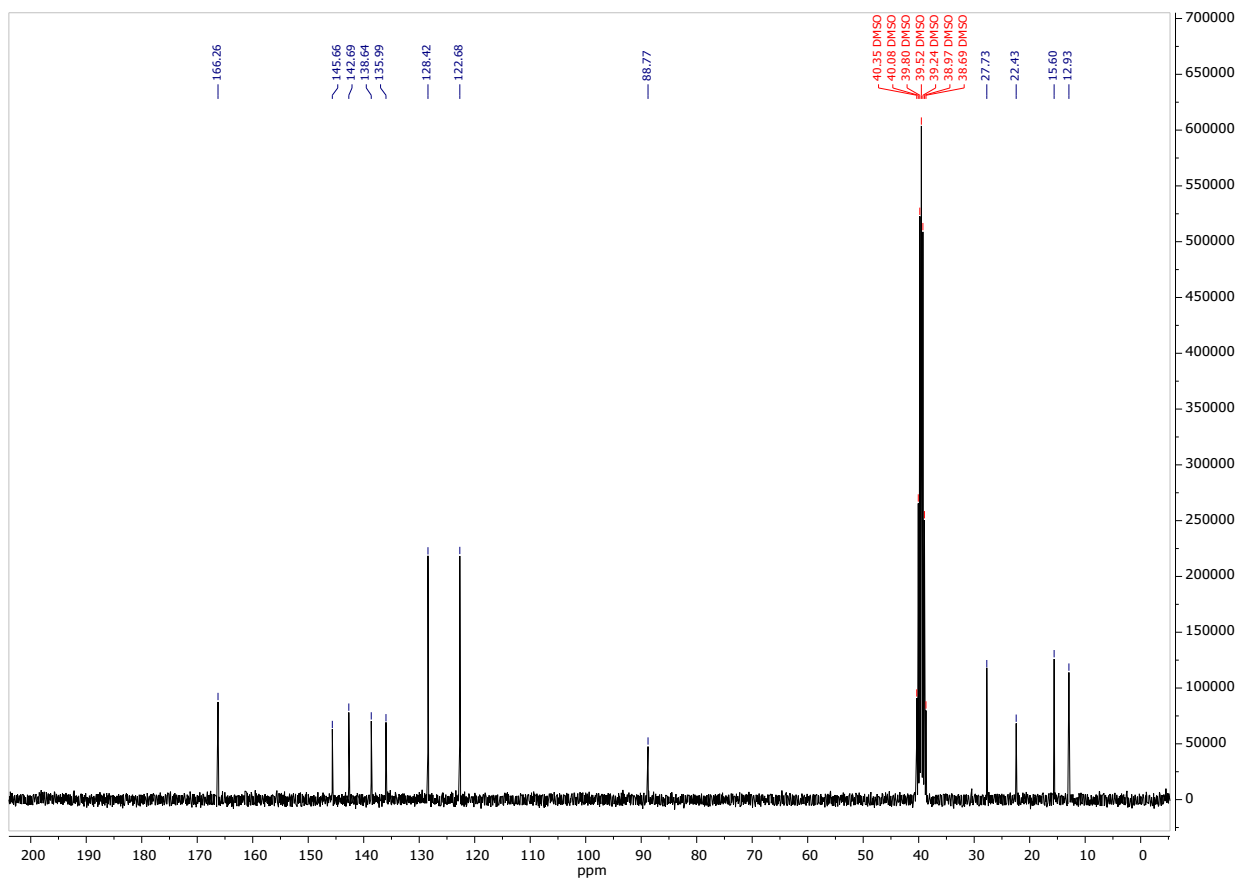

**Figure-89:** HRMS spectrum of compound **6d**

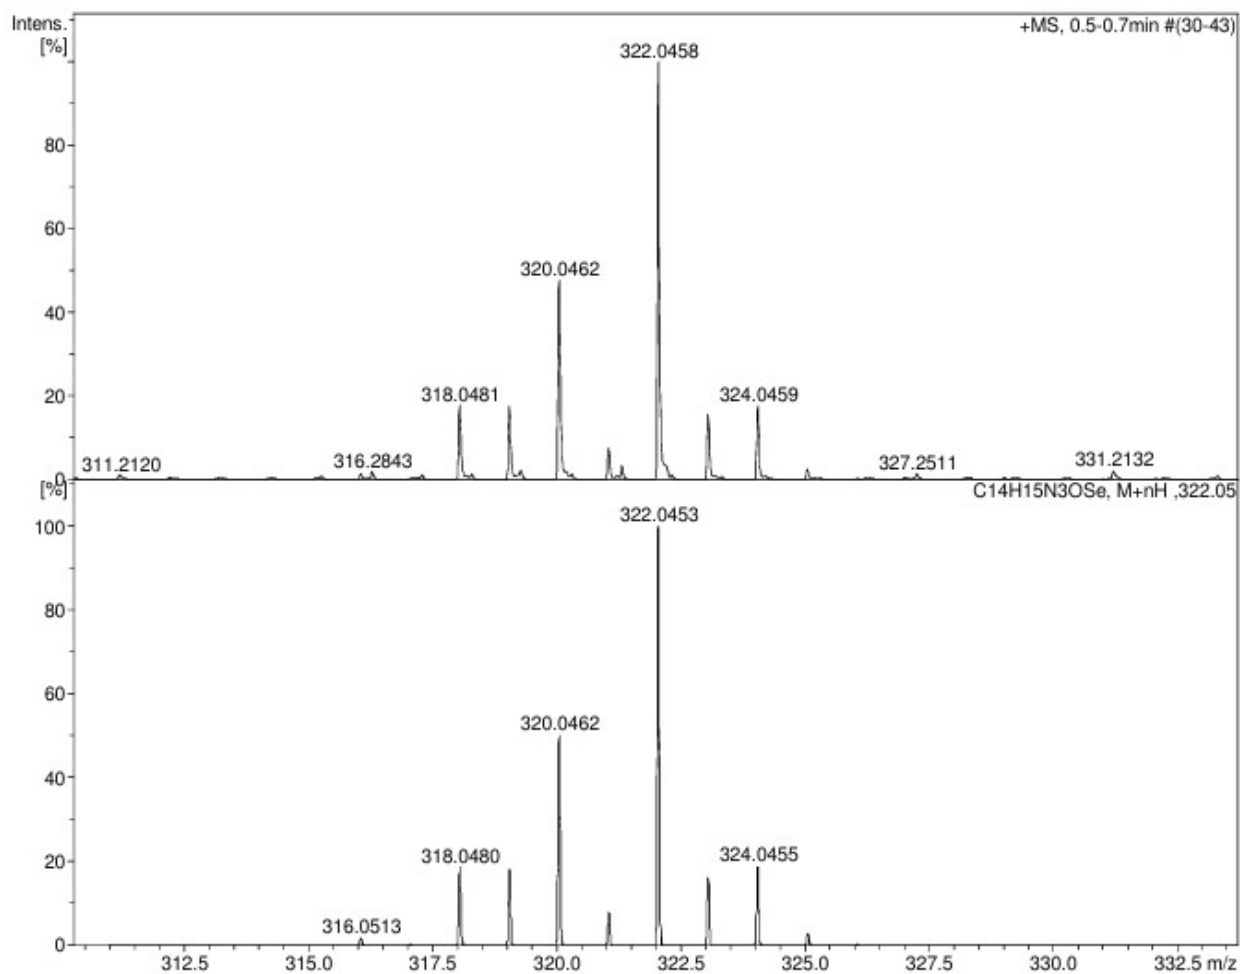

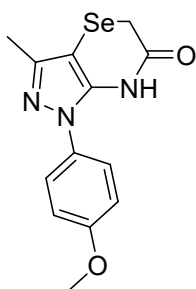

*1-(4-Methoxyphenyl)-3-methyl-1,7-dihydropyrazolo[4,3-b][1,4]selenazin-6(5H)-one, 6e*

Grey powder, m.p. 159-158°C, yield 72% (0.09 g)

$^1\text{H}$  NMR (300 MHz,  $\text{DMSO-}d_6$ )  $\delta$  10.46 (s, 1H), 7.41 (d,  $J = 8.6$  Hz, 2H), 7.03 (d,  $J = 8.6$  Hz, 2H), 3.80 (s, 3H), 3.39 (s, 2H), 2.13 (s, 3H).  $^{77}\text{Se}$  NMR (57 MHz, DMSO)  $\delta$  85.41.  $^{13}\text{C}\{^1\text{H}\}$  NMR (76 MHz, DMSO)  $\delta$  166.31, 158.24, 145.32, 138.74, 131.29, 124.61, 114.25, 88.08, 55.45, 22.38, 12.90. HRMS (ESI-TOF):  $m/z$   $[\text{M}+\text{H}]^+$ : calcd for  $[\text{C}_{13}\text{H}_{14}\text{N}_3\text{O}_2\text{Se}]^+$ : 324.0246; found: 324.0247.

**Figure-90:**  $^1\text{H}$  NMR spectrum (300 MHz) of **6e** in  $\text{DMSO-}d_6$

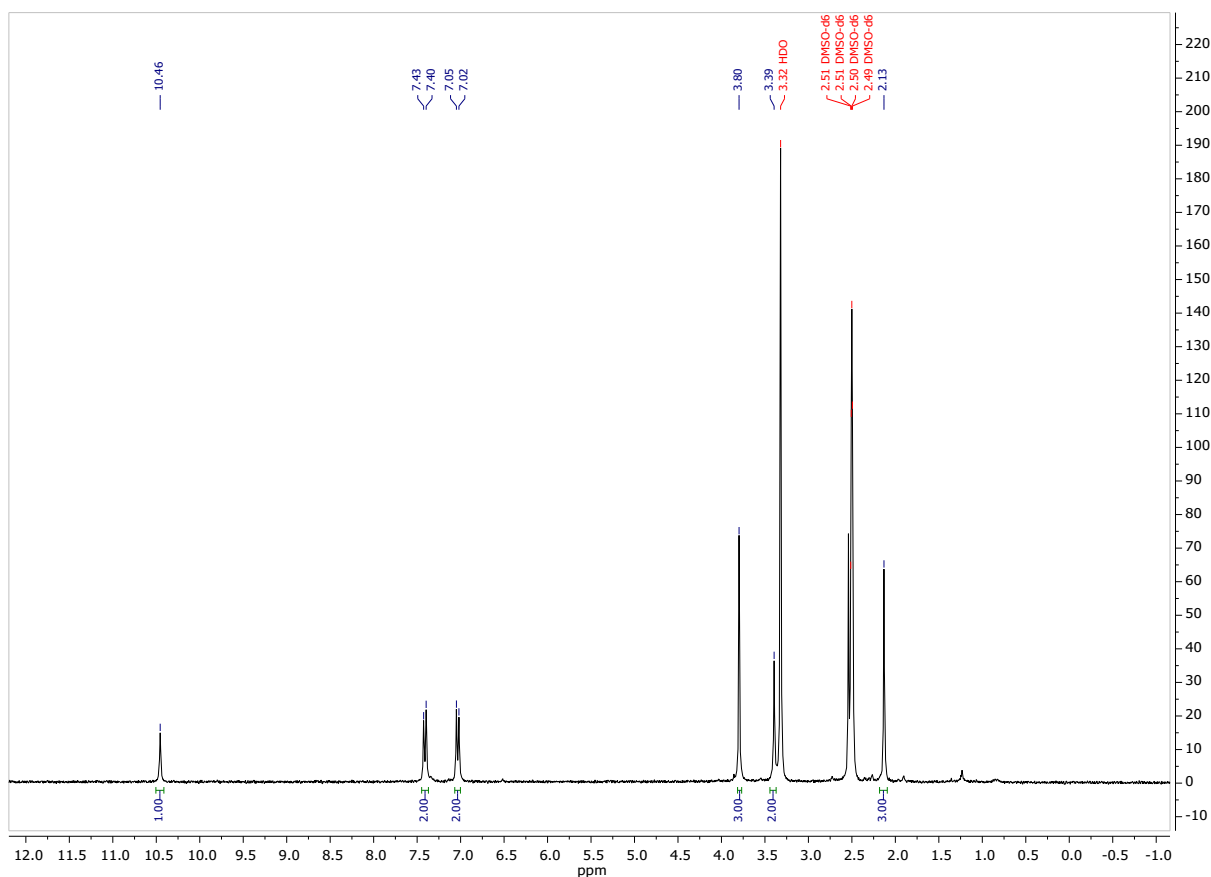

**Figure-91:**  $^{77}\text{Se}$  NMR spectrum (57 MHz) of **6e** in  $\text{DMSO-}d_6$

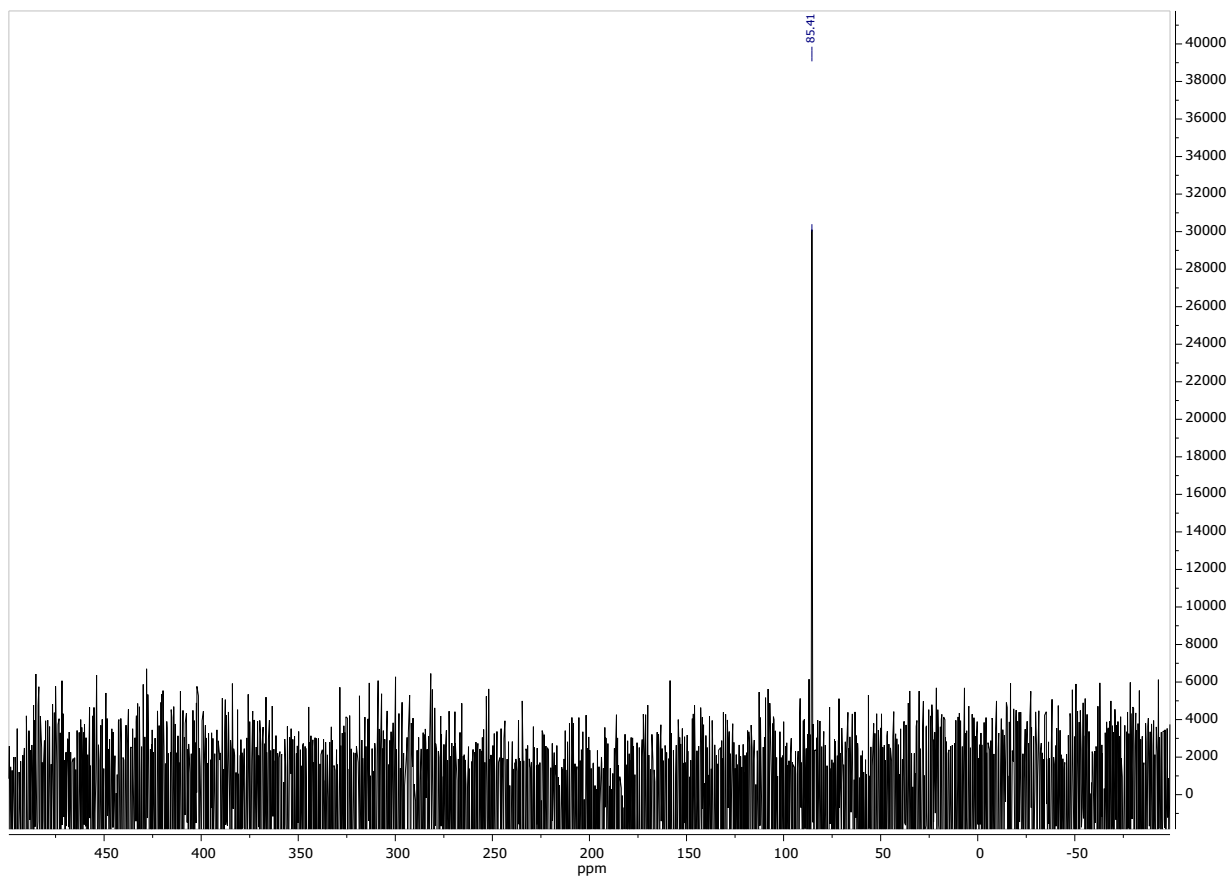

**Figure-92:**  $^{13}\text{C}$  NMR spectrum (76 MHz) of **6e** in  $\text{DMSO-}d_6$

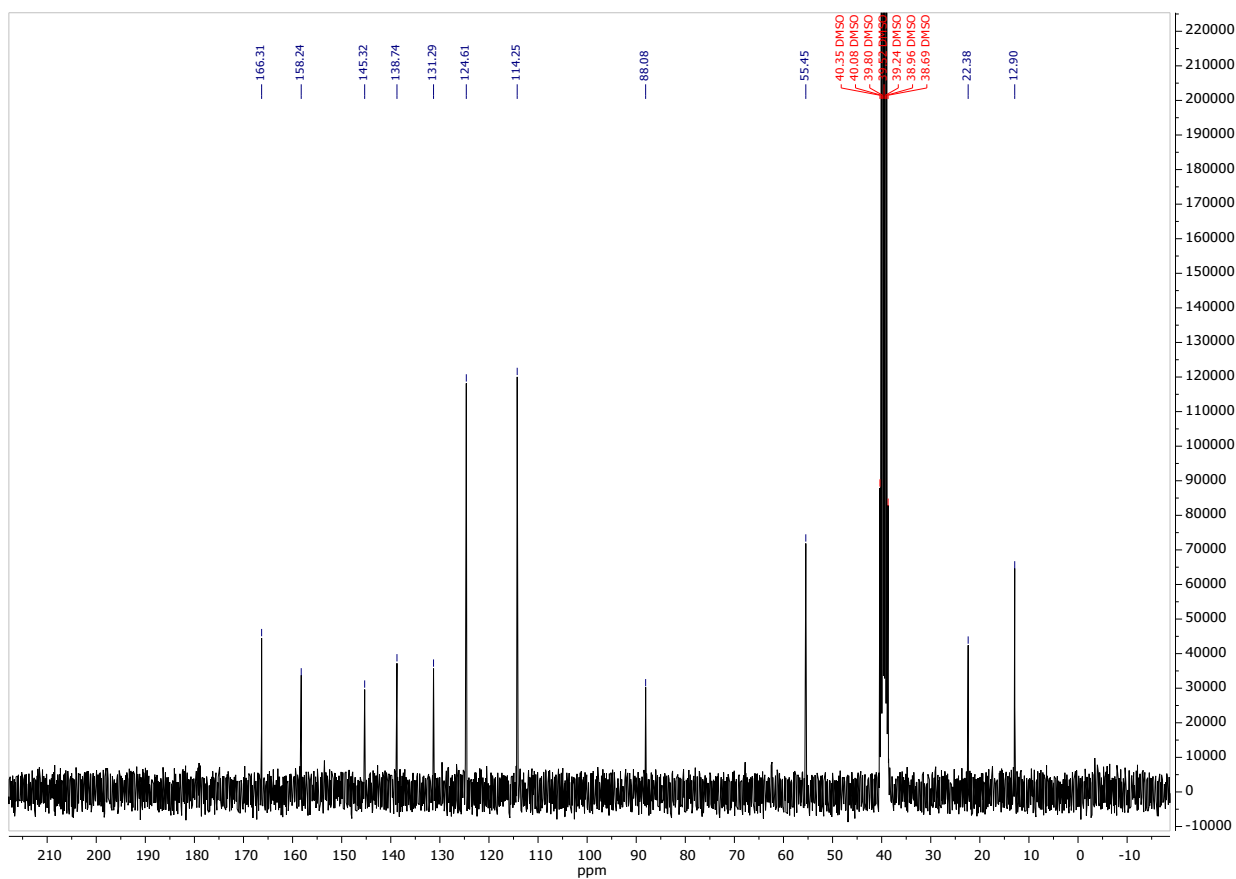

**Figure-93:** HRMS spectrum of compound **6e**

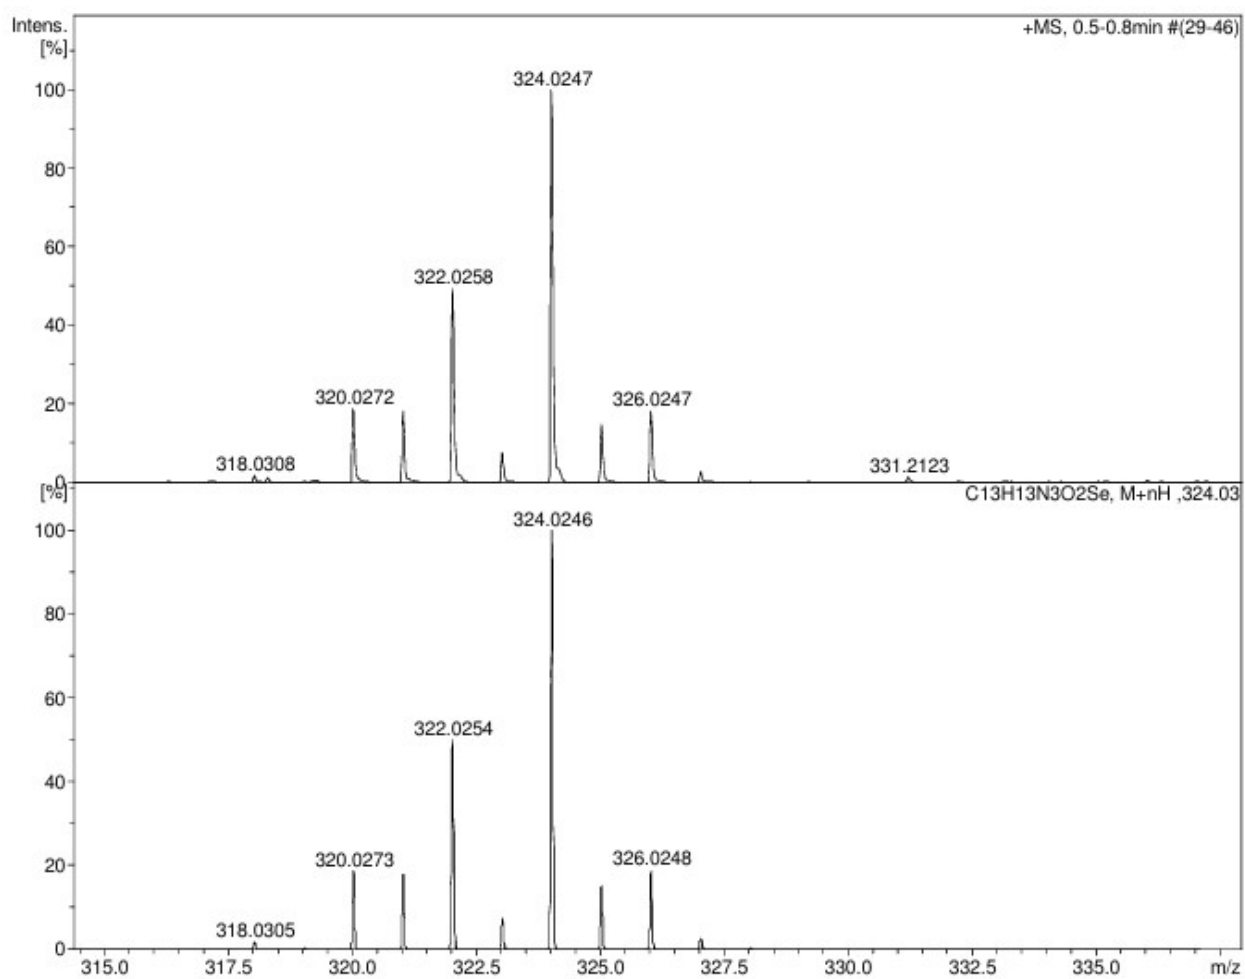

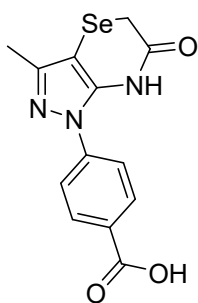

*4-(3-Methyl-6-oxo-6,7-dihydropyrazolo[4,3-b][1,4]selenazin-1(5H)-yl)benzoic acid, 6f*

Orange powder, m.p. 291-293 °C, yield 75% (0.10 g)

$^1\text{H}$  NMR (300 MHz, DMSO- $d_6$ )  $\delta$  10.69 (s, 1H), 8.04 (d,  $J = 8.6$  Hz, 2H), 7.67 (d,  $J = 8.6$  Hz, 2H), 3.44 (s, 2H), 2.17 (s, 3H).  $^{77}\text{Se}$  NMR (57 MHz, DMSO)  $\delta$  88.35.  $^{13}\text{C}\{^1\text{H}\}$  NMR (76 MHz, DMSO)  $\delta$  166.79, 166.25, 147.00, 141.49, 138.87, 130.53, 128.68, 121.83, 90.43, 22.46, 13.03. HRMS (ESI-TOF):  $m/z$   $[\text{M}+\text{H}]^+$ : calcd for  $[\text{C}_{13}\text{H}_{12}\text{N}_3\text{O}_3\text{Se}]^+$ : 338.0039; found: 338.0043.

**Figure-94:**  $^1\text{H}$  NMR spectrum (300 MHz) of **6f** in DMSO- $d_6$

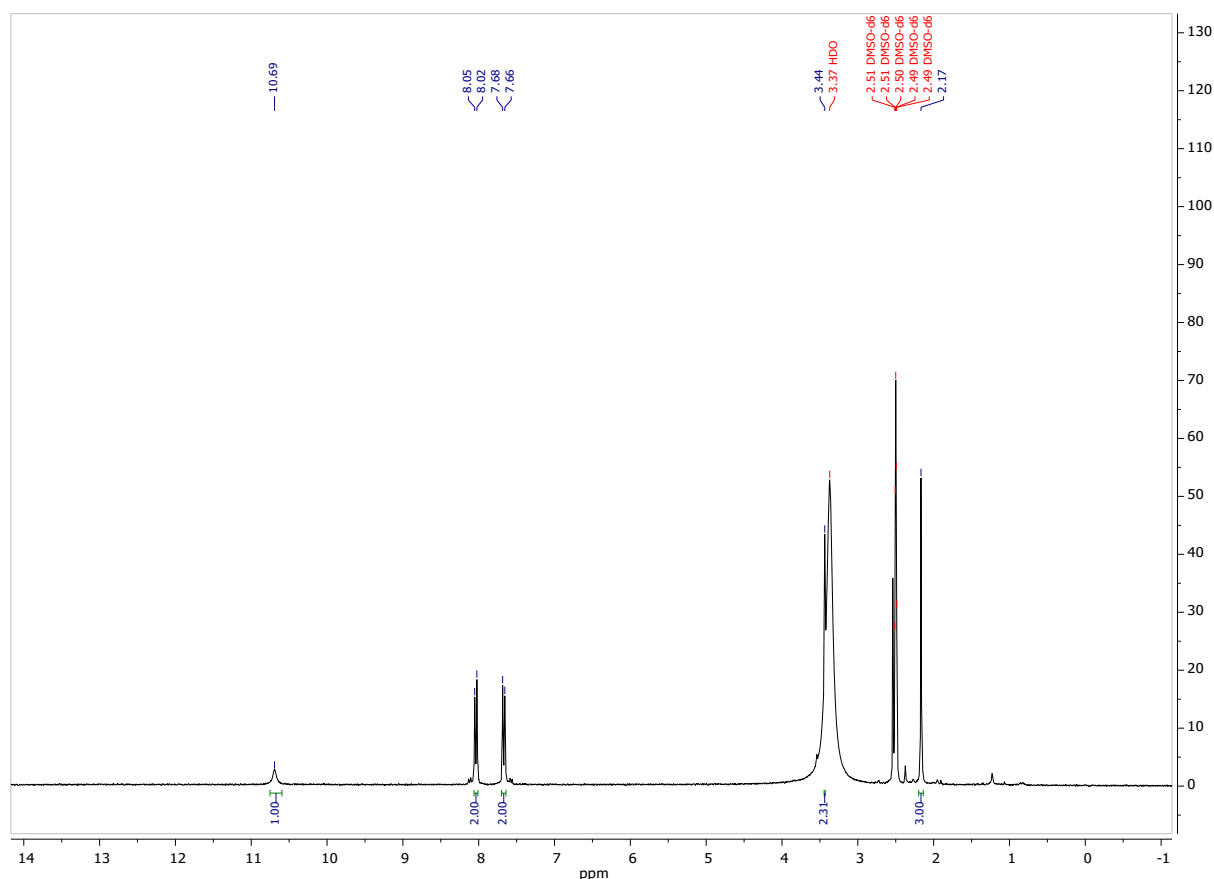

**Figure-95:**  $^{77}\text{Se}$  NMR spectrum (57 MHz) of **6f** in  $\text{DMSO-}d_6$

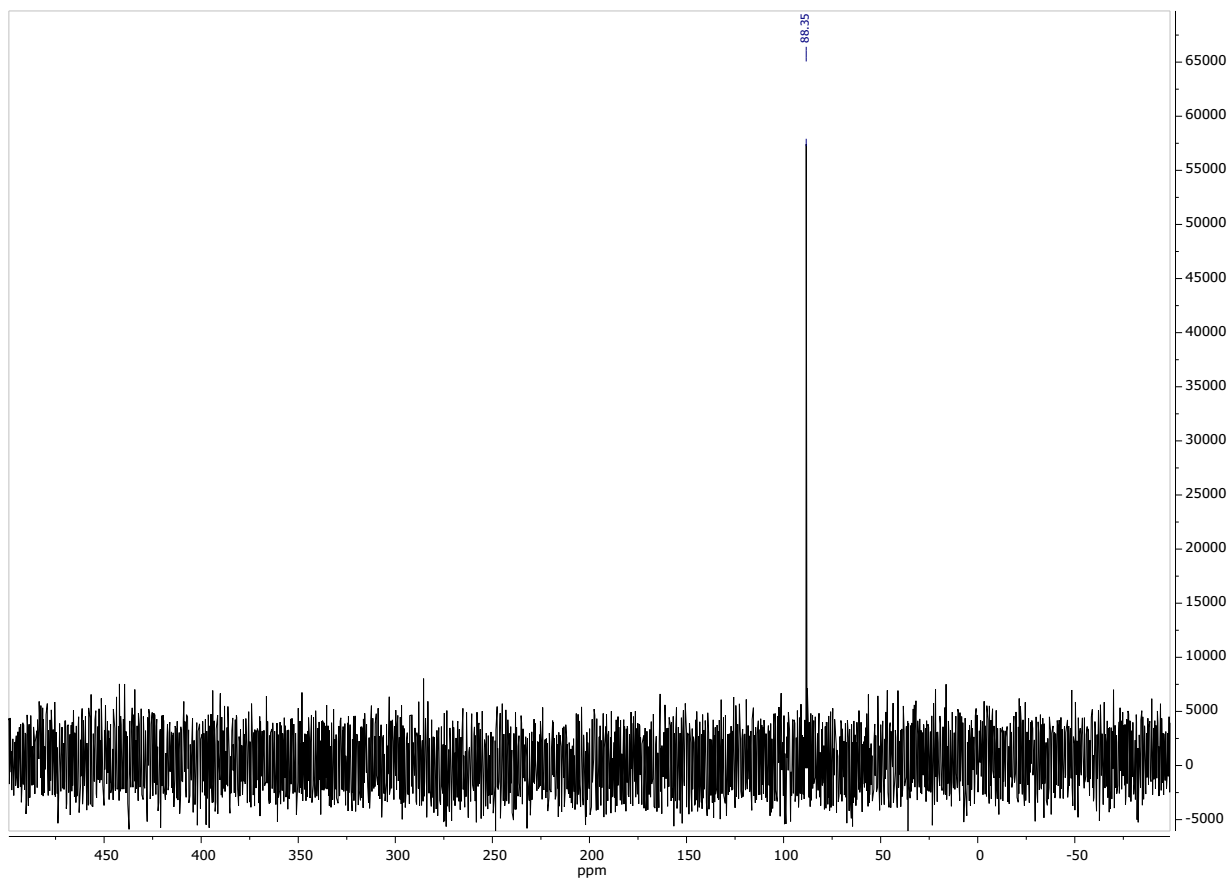

**Figure-96:**  $^{13}\text{C}$  NMR spectrum (76 MHz) of **6f** in  $\text{DMSO-}d_6$

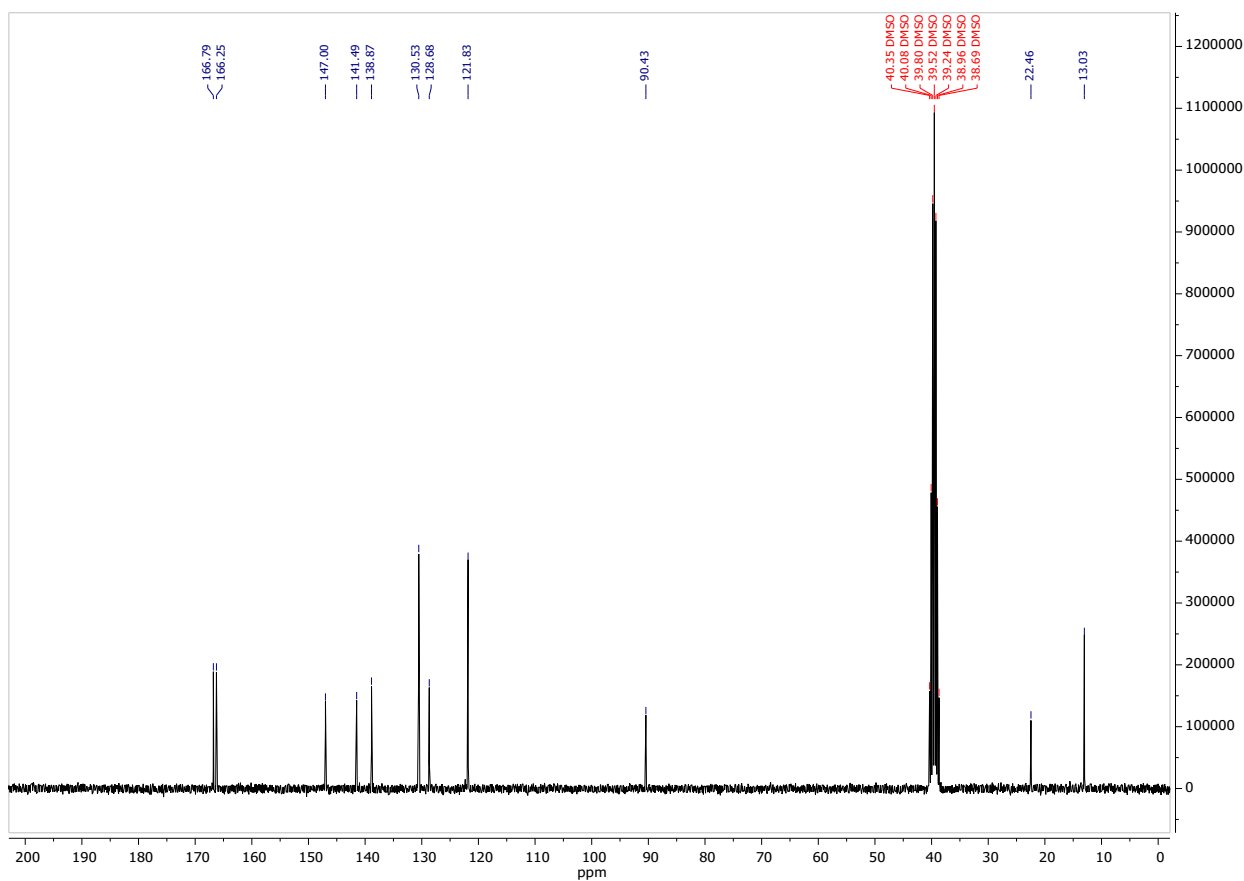

**Figure-97:** HRMS spectrum of compound **6f**

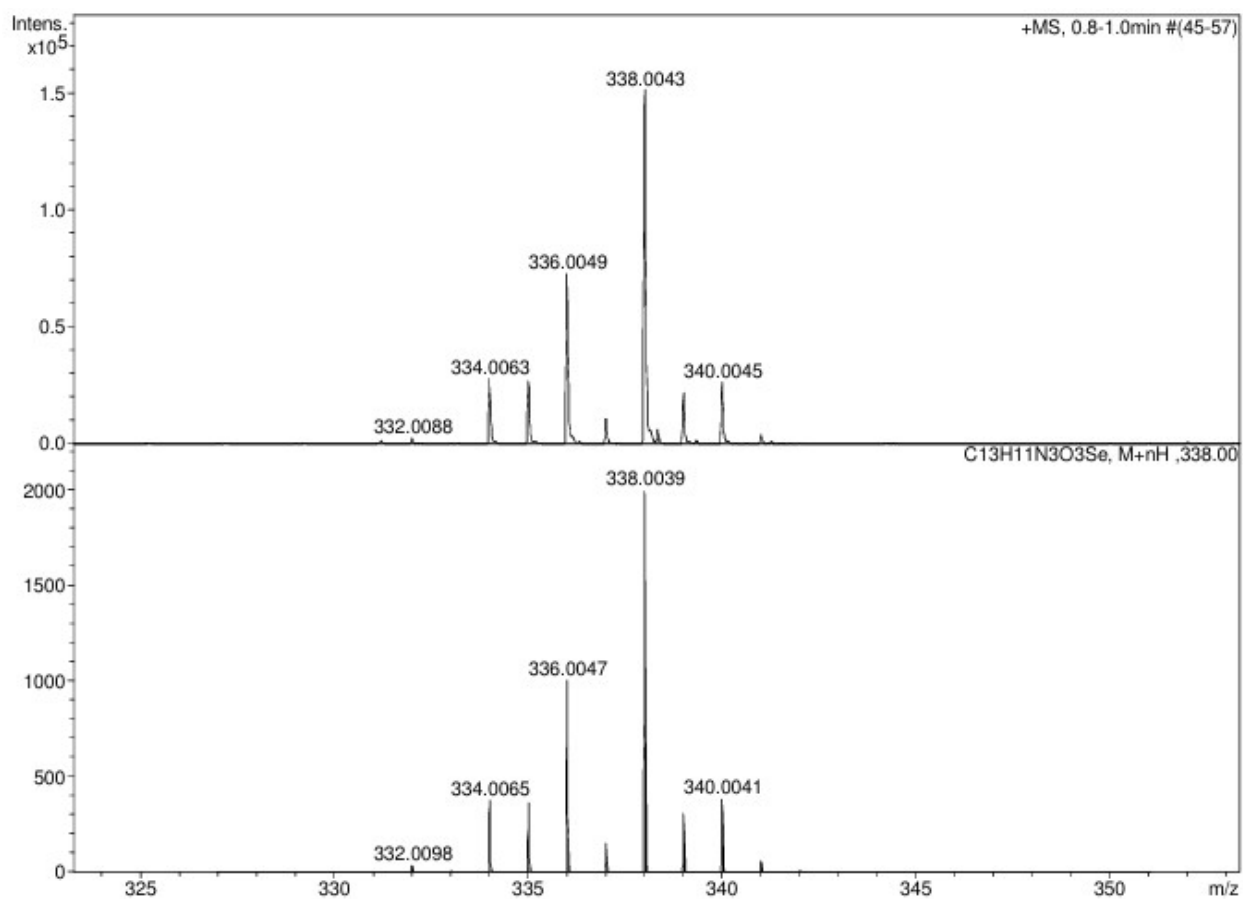

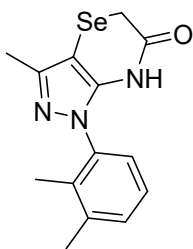

*1-(2,3-Dimethylphenyl)-3-methyl-1,7-dihydropyrazolo[4,3-b][1,4]selenazin-6(5H)-one, 6h*

Grey powder, m.p. 185-187°C, yield 74% (0.09 g)

$^1\text{H}$  NMR (300 MHz, DMSO- $d_6$ )  $\delta$  10.37 (s, 1H), 7.28 (d,  $J = 7.6$  Hz, 1H), 7.19 (t,  $J = 7.7$  Hz, 1H), 7.06 (d,  $J = 7.6$  Hz, 1H), 3.37 (s, 2H), 2.29 (s, 3H), 2.13 (s, 3H), 1.88 (s, 3H).  $^{77}\text{Se}$  NMR (57 MHz, DMSO)  $\delta$  81.90.  $^{13}\text{C}\{^1\text{H}\}$  NMR (76 MHz, DMSO)  $\delta$  166.29, 145.16, 140.27, 137.88, 136.76, 134.34, 130.29, 125.77, 125.36, 85.65, 22.26, 19.89, 14.06, 12.97. HRMS (ESI-TOF):  $m/z$   $[\text{M}+\text{H}]^+$ : calcd for  $[\text{C}_{14}\text{H}_{16}\text{N}_3\text{OSe}]^+$ : 322.0453; found: 322.0452.

**Figure-98:**  $^1\text{H}$  NMR spectrum (300 MHz) of **6h** in DMSO- $d_6$

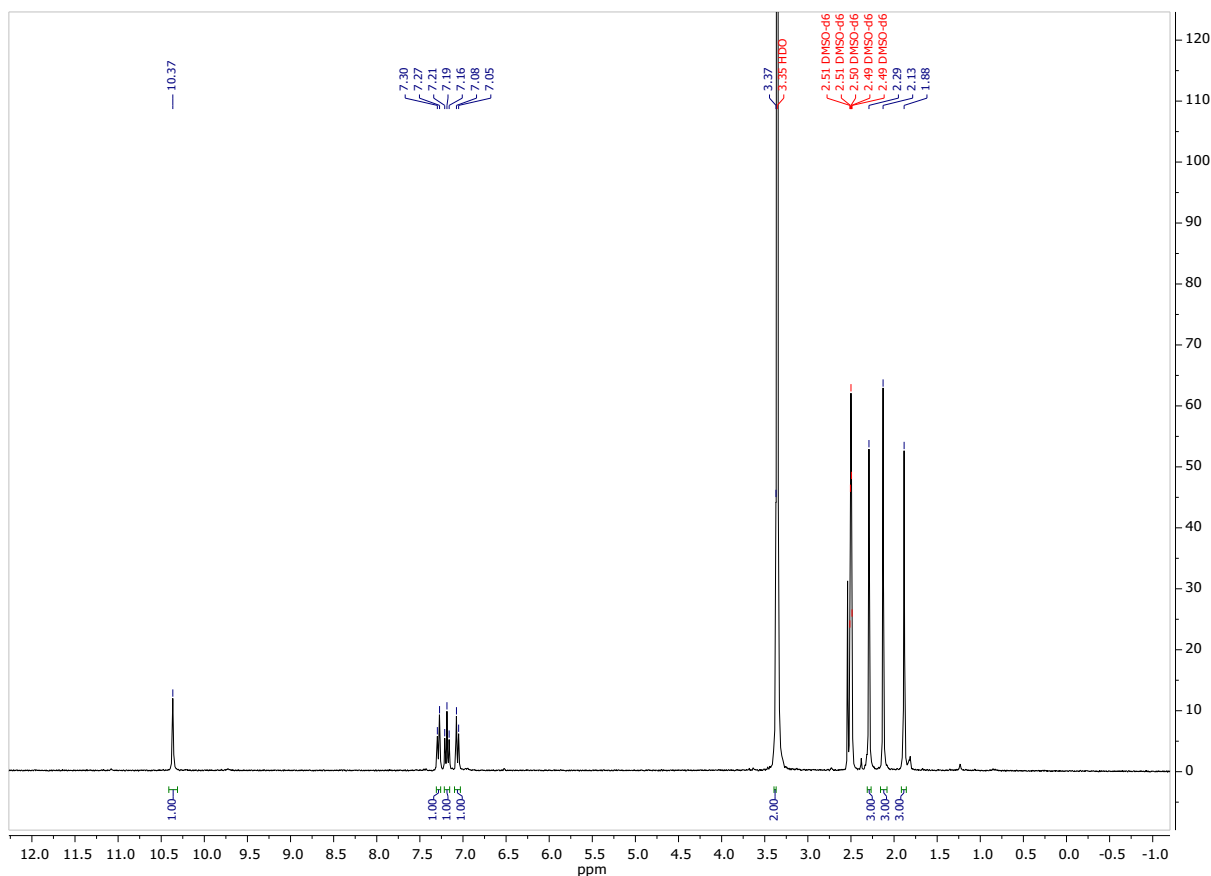

**Figure-99:**  $^{77}\text{Se}$  NMR spectrum (57 MHz) of **6h** in  $\text{DMSO-}d_6$

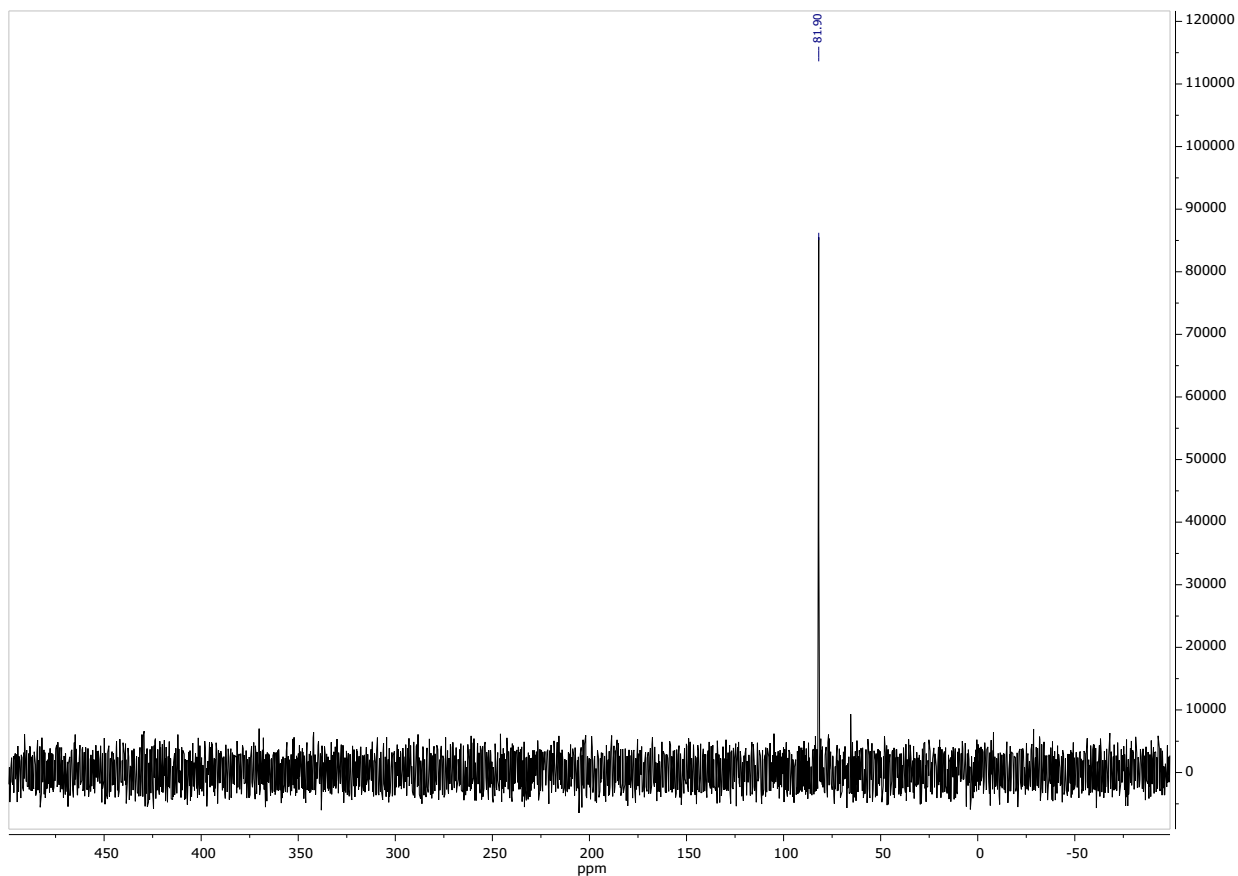

**Figure-100:**  $^{13}\text{C}$  NMR spectrum (76 MHz) of **6h** in  $\text{DMSO-}d_6$

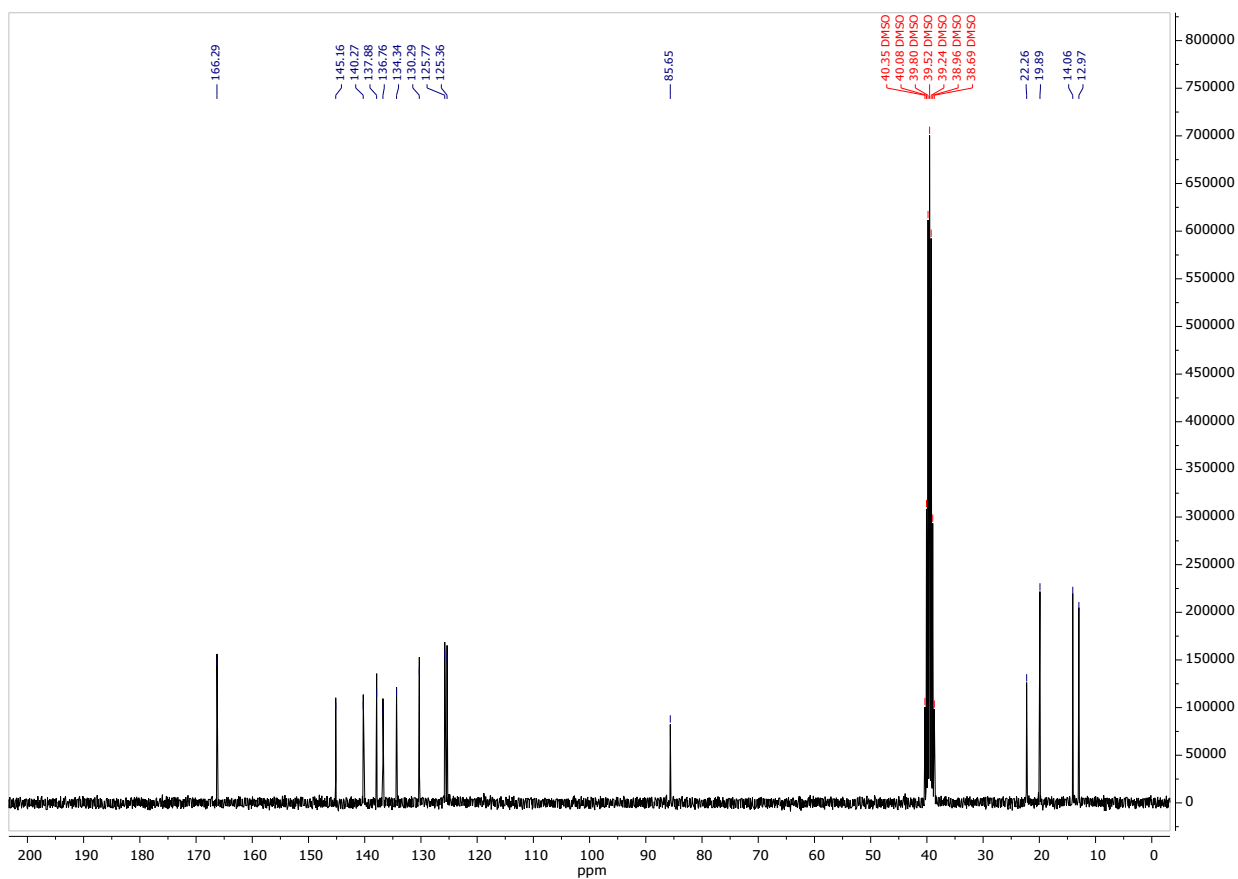

**Figure-101:** HRMS spectrum of compound **6h**

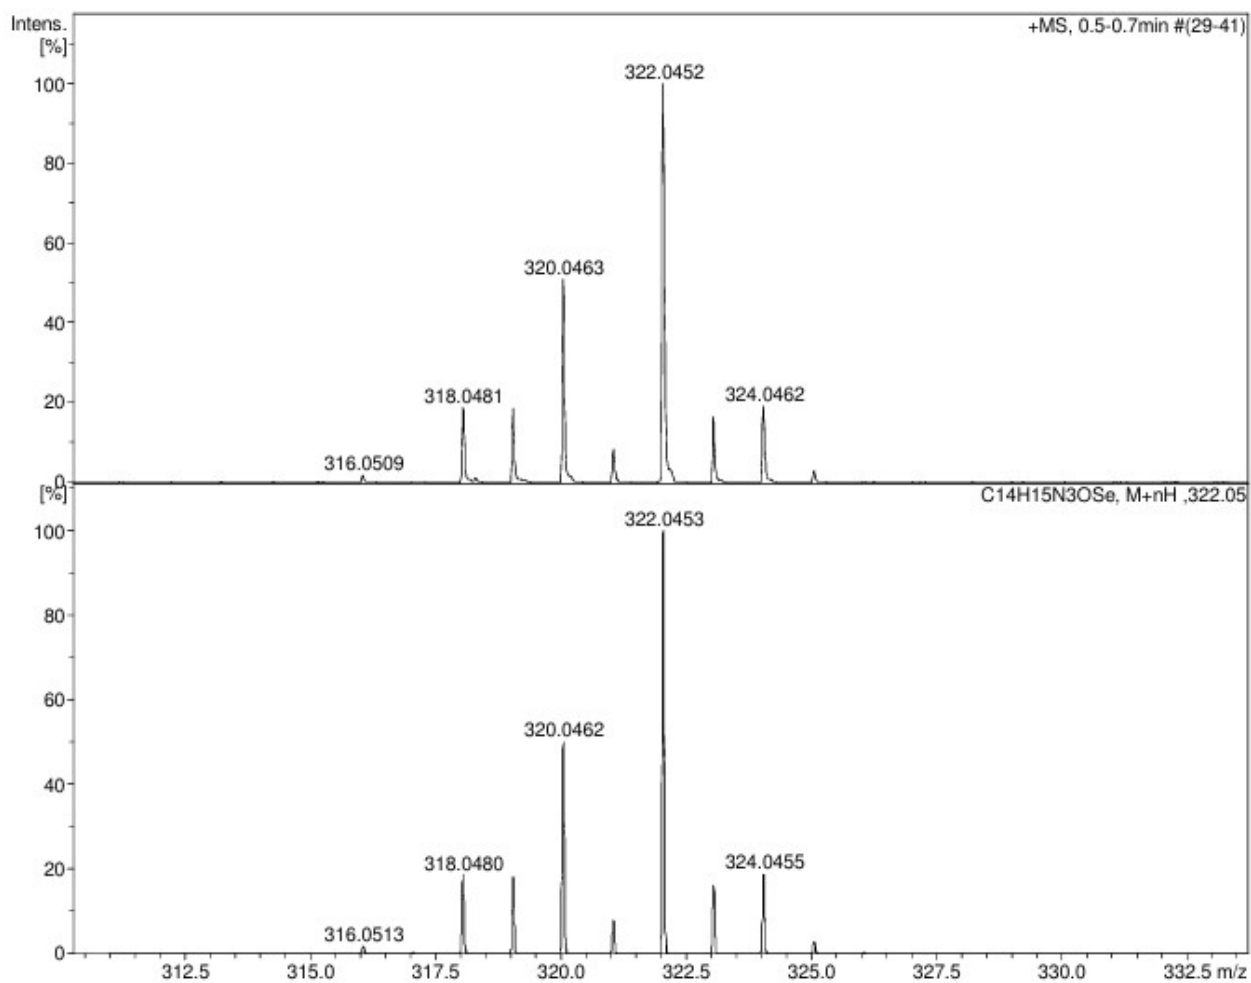

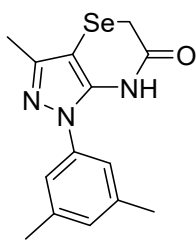

*1-(3,5-Dimethylphenyl)-3-methyl-1,7-dihydropyrazolo[4,3-*b*][1,4]selenazin-6(5H)-one, 6i*

Pale yellow powder, m.p. 181-183°C, yield 88% (0.11 g)

$^1\text{H}$  NMR (300 MHz,  $\text{DMSO-}d_6$ )  $\delta$  10.52 (s, 1H), 7.14 (s, 2H), 6.99 (s, 1H), 3.40 (s, 2H), 2.32 (s, 6H), 2.14 (s, 3H).  $^{77}\text{Se}$  NMR (57 MHz, DMSO)  $\delta$  84.59.  $^{13}\text{C}\{^1\text{H}\}$  NMR (76 MHz, DMSO)  $\delta$  166.29, 145.69, 138.58, 138.40, 137.99, 128.40, 120.31, 88.77, 22.41, 20.89, 12.92. HRMS (ESI-TOF):  $m/z$   $[\text{M}+\text{H}]^+$ : calcd for  $[\text{C}_{14}\text{H}_{16}\text{N}_3\text{OSe}]^+$ : 322.0453; found: 322.0464.

**Figure-102:**  $^1\text{H}$  NMR spectrum (300 MHz) of **6i** in  $\text{DMSO-}d_6$

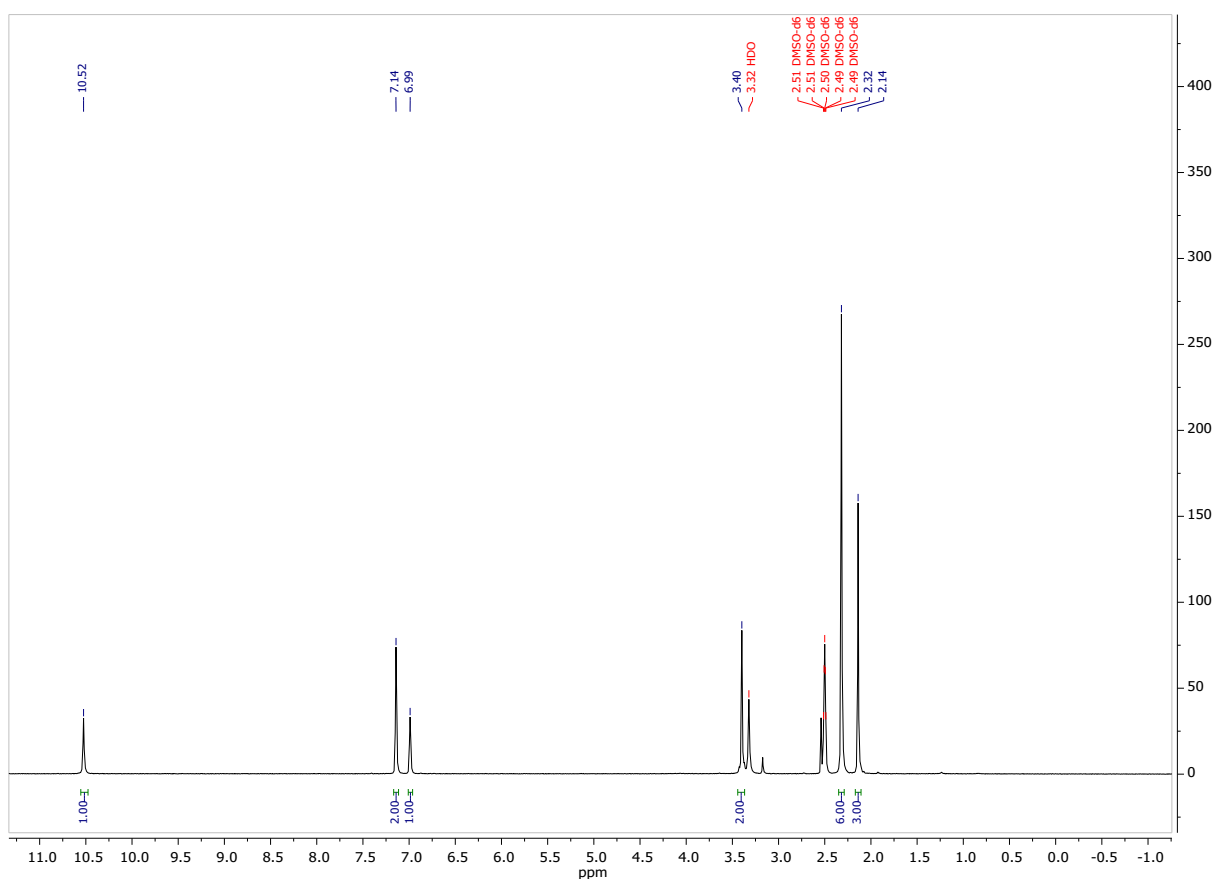

**Figure-103:**  $^{77}\text{Se}$  NMR spectrum (57 MHz) of **6i** in  $\text{DMSO-}d_6$

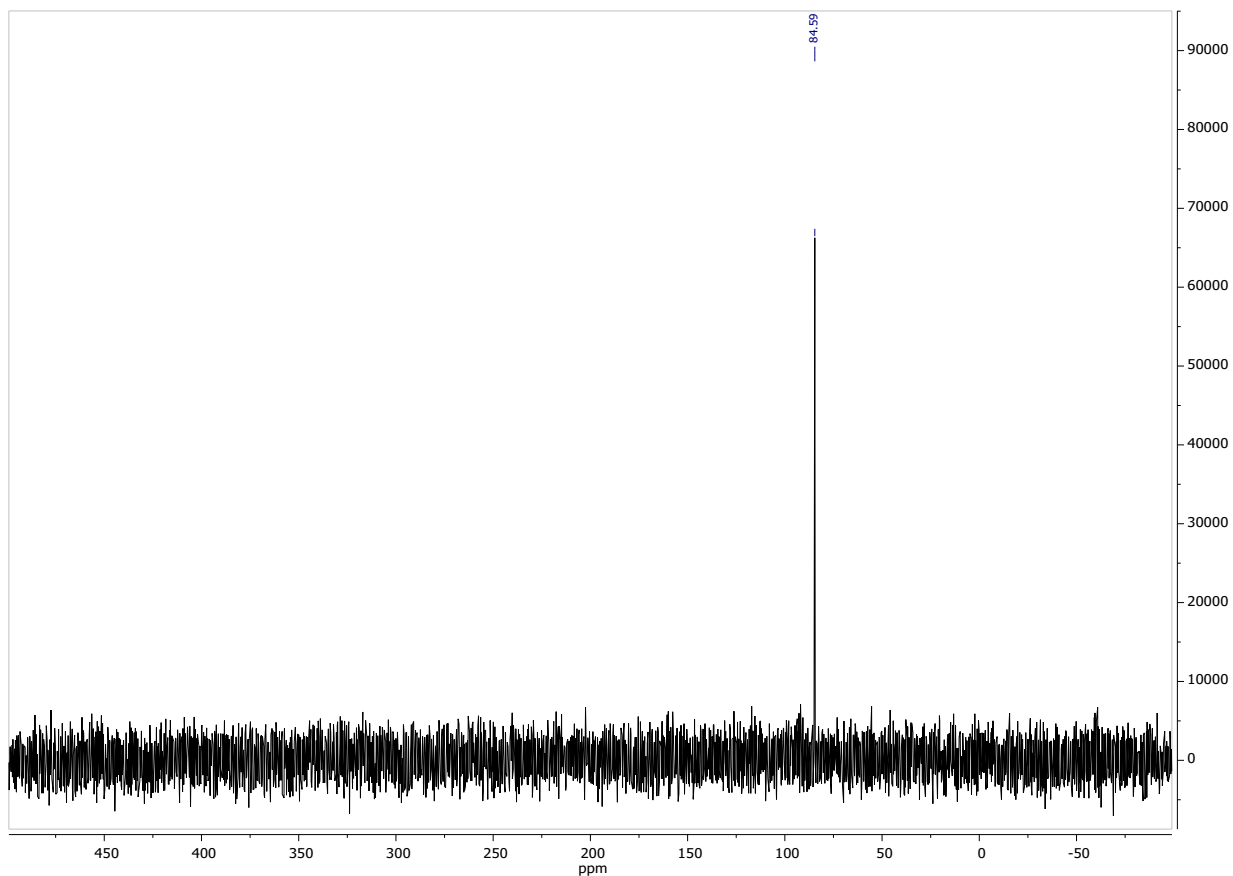

**Figure-104:**  $^{13}\text{C}$  NMR spectrum (76 MHz) of **6i** in  $\text{DMSO-}d_6$

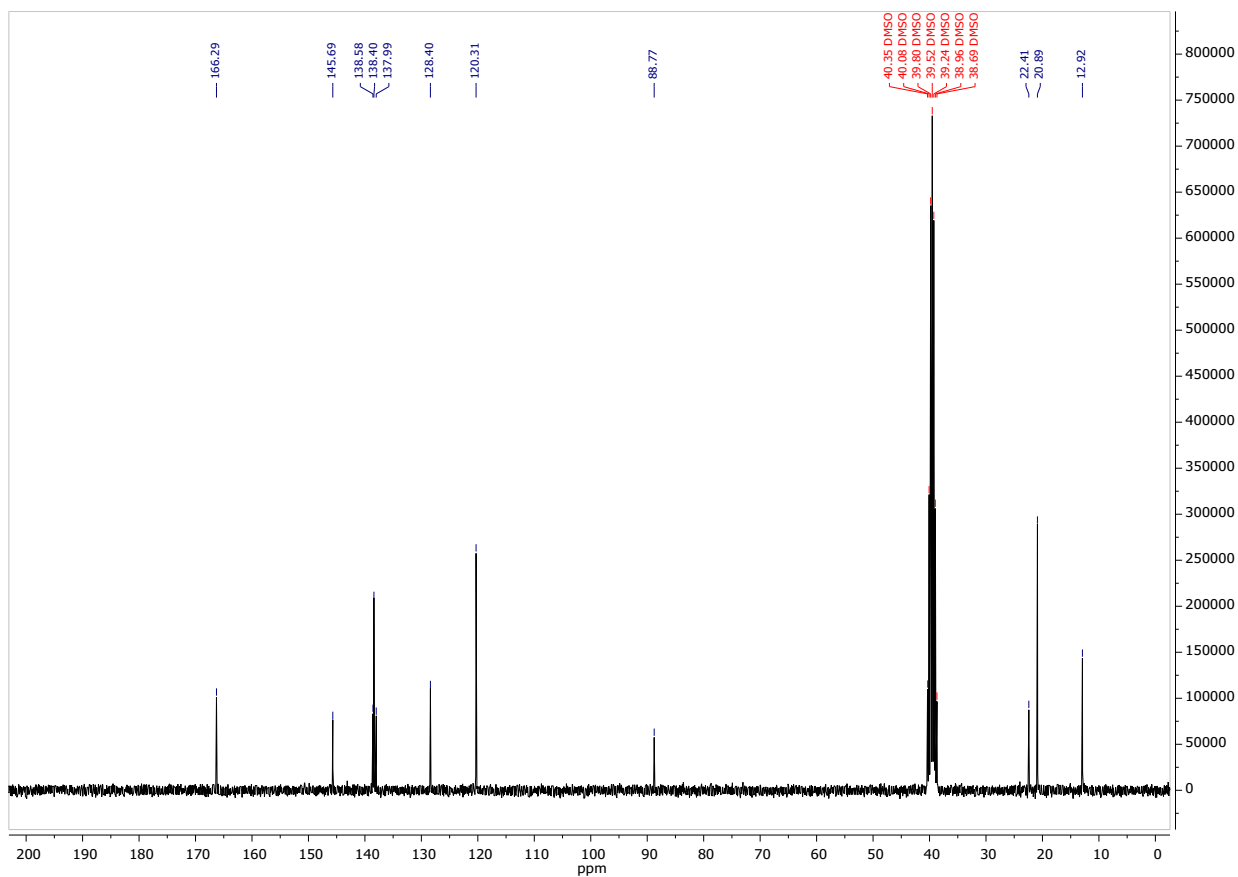

**Figure-105:** HRMS spectrum of compound **6i**

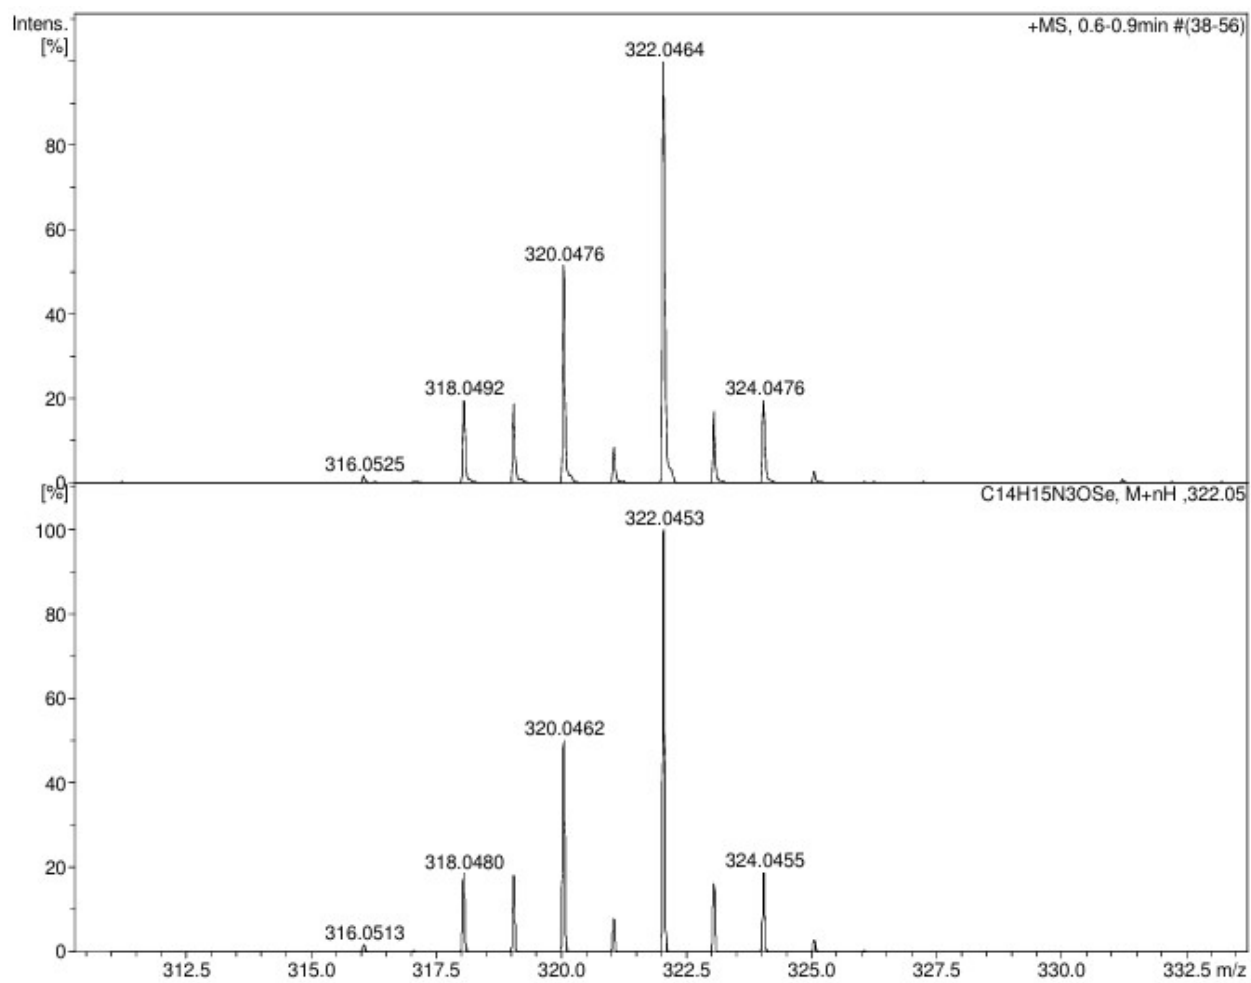

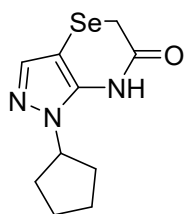

*1-Cyclopentyl-1,7-dihydropyrazolo[4,3-b][1,4]selenazin-6(5H)-one, 6j*

White powder, m.p. 185-187°C, yield 80% (0.09 g)

$^1\text{H}$  NMR (300 MHz, DMSO- $d_6$ )  $\delta$  10.72 (s, 1H), 7.30 (s, 1H), 4.74 – 4.65 (m, 1H), 3.32 (s, 2H), 2.00 – 1.92 (m, 2H), 1.87 – 1.76 (m, 4H), 1.61 – 1.54 (m, 2H).  $^{77}\text{Se}$  NMR (57 MHz, DMSO)  $\delta$  91.74.  $^{13}\text{C}\{^1\text{H}\}$  NMR (76 MHz, DMSO)  $\delta$  166.38, 138.54, 136.17, 84.46, 57.70, 31.98, 24.17, 21.90. HRMS (ESI-TOF):  $m/z$   $[\text{M}+\text{H}]^+$ : calcd for  $[\text{C}_{10}\text{H}_{14}\text{N}_3\text{OSe}]^+$ : 272.0297; found: 272.0307.

**Figure-106:**  $^1\text{H}$  NMR spectrum (300 MHz) of **6j** in DMSO- $d_6$

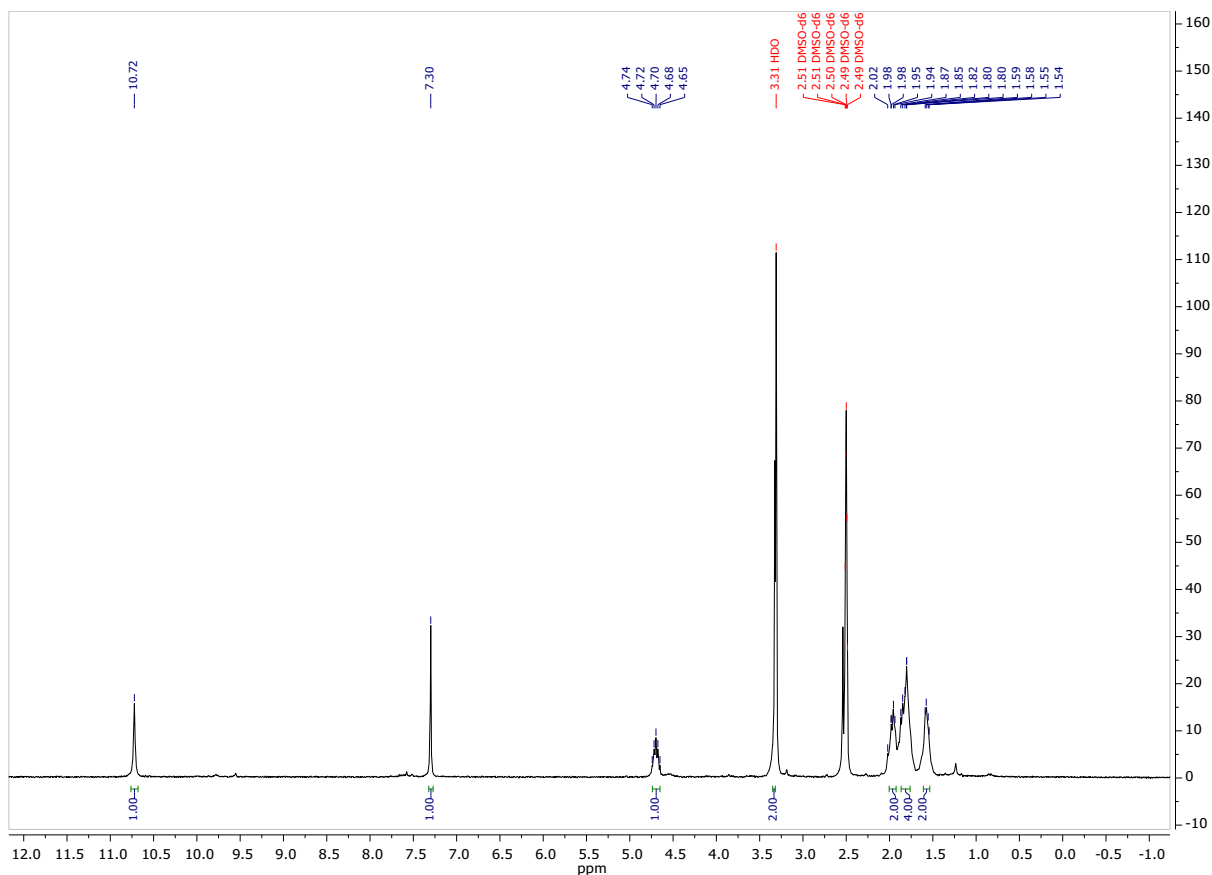

**Figure-107:**  $^{77}\text{Se}$  NMR spectrum (57 MHz) of **6j** in  $\text{DMSO-}d_6$

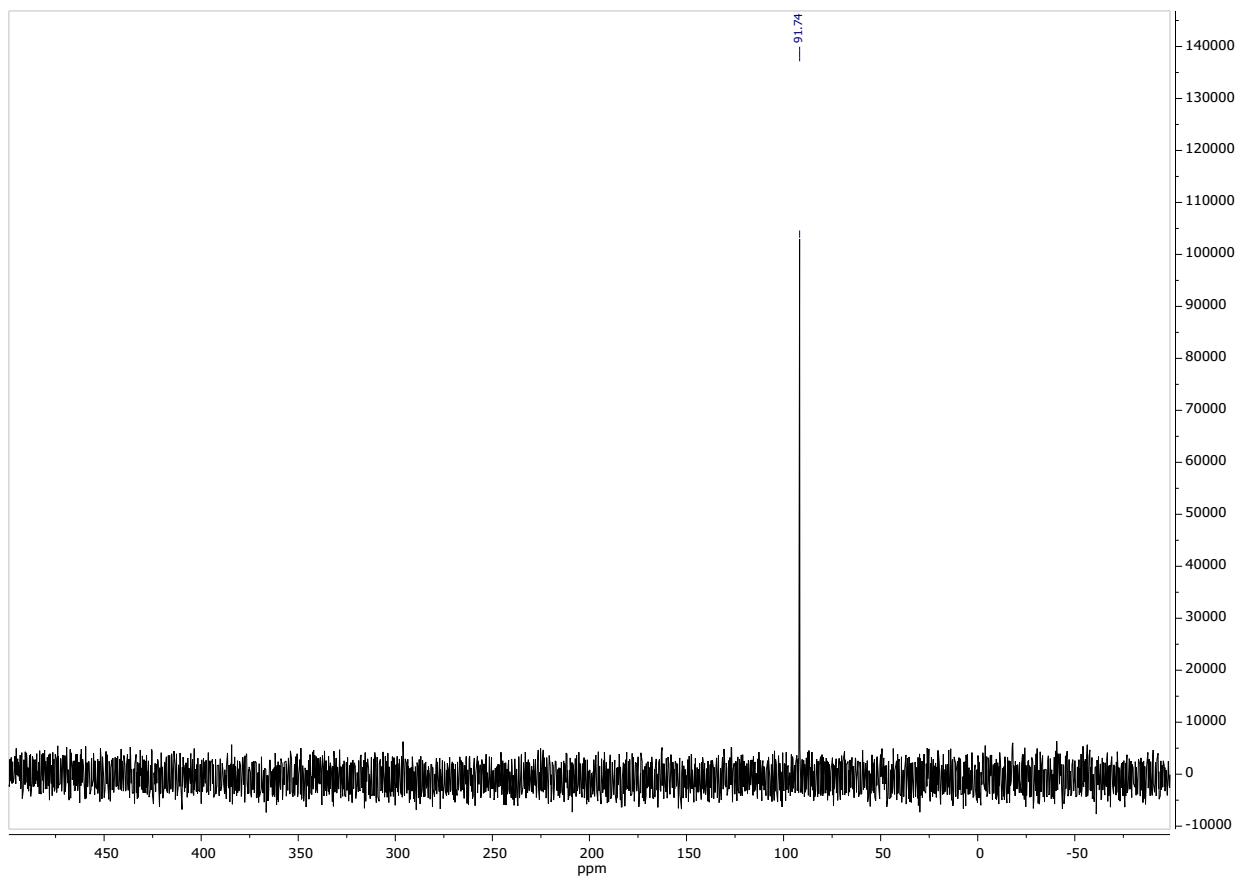

**Figure-108:**  $^{13}\text{C}$  NMR spectrum (76 MHz) of **6j** in  $\text{DMSO-}d_6$

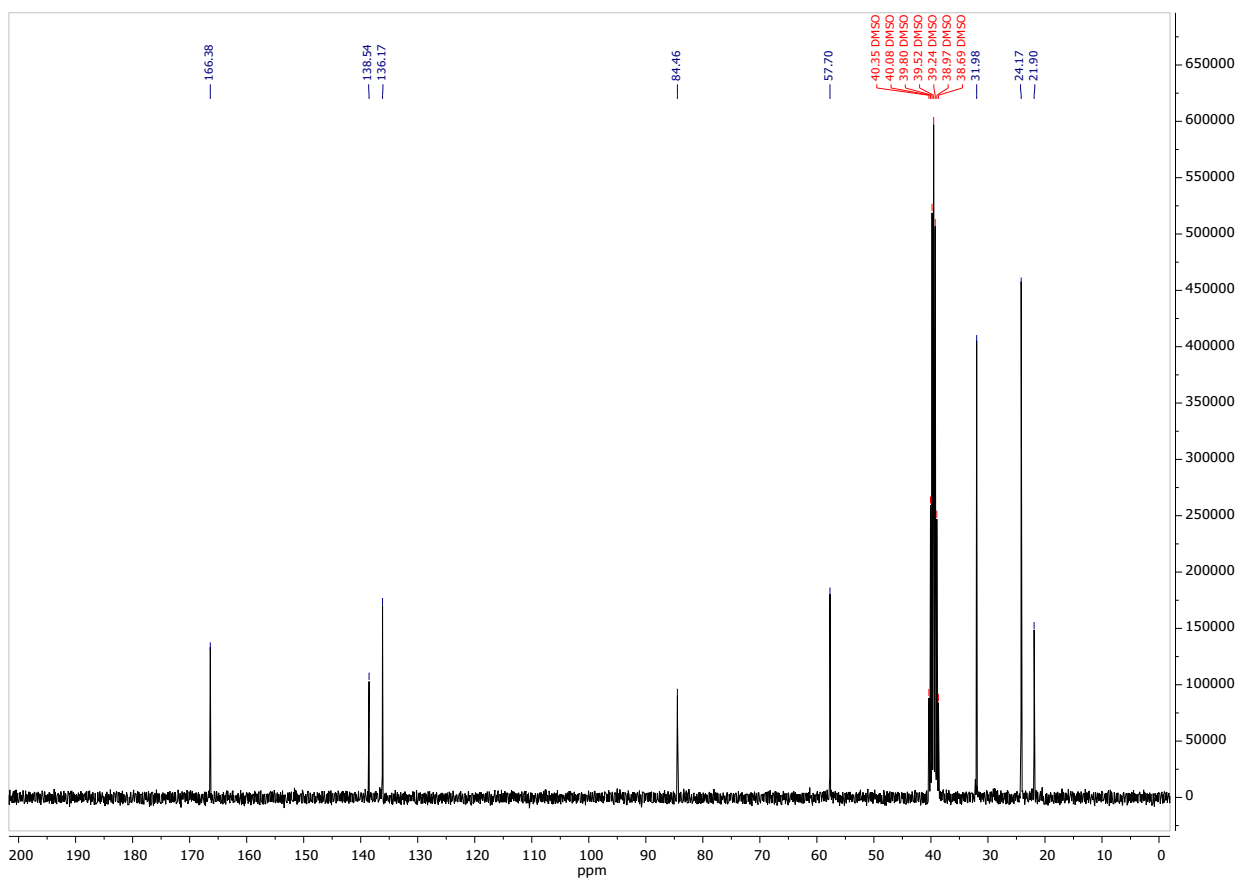

**Figure-109:** HRMS spectrum of compound **6j**

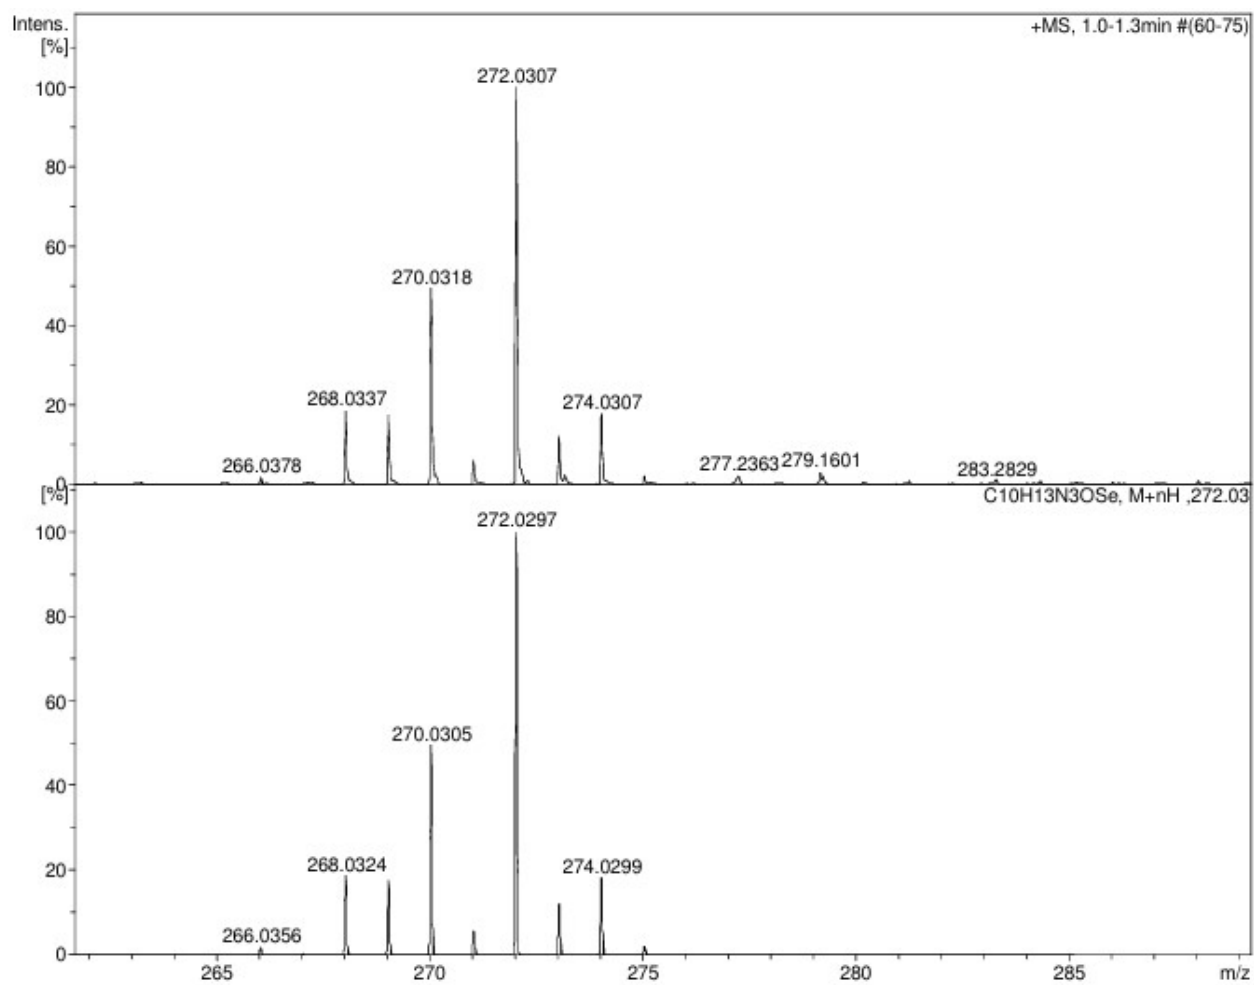

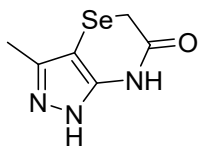

*3-Methyl-1,7-dihydropyrazolo[4,3-*b*][1,4]selenazin-6(5H)-one, 6l*

Pale yellow powder, m.p. 255-257°C, yield 62% (0.05 g)

$^1\text{H}$  NMR (300 MHz, DMSO- $d_6$ )  $\delta$  12.22 (s, 1H), 10.39 (s, 1H), 3.28 (s, 2H), 2.13 (s, 3H).  $^{77}\text{Se}$  NMR (57 MHz, DMSO)  $\delta$  72.89.  $^{13}\text{C}\{^1\text{H}\}$  NMR (76 MHz, DMSO)  $\delta$  166.06, 149.21, 135.86, 85.03, 21.60, 10.19. HRMS (ESI-TOF):  $m/z$   $[\text{M}+\text{H}]^+$ : calcd for  $[\text{C}_6\text{H}_8\text{N}_3\text{OSe}]^+$ : 217.9827; found: 217.9826.

**Figure-110:**  $^1\text{H}$  NMR spectrum (300 MHz) of **6l** in DMSO- $d_6$

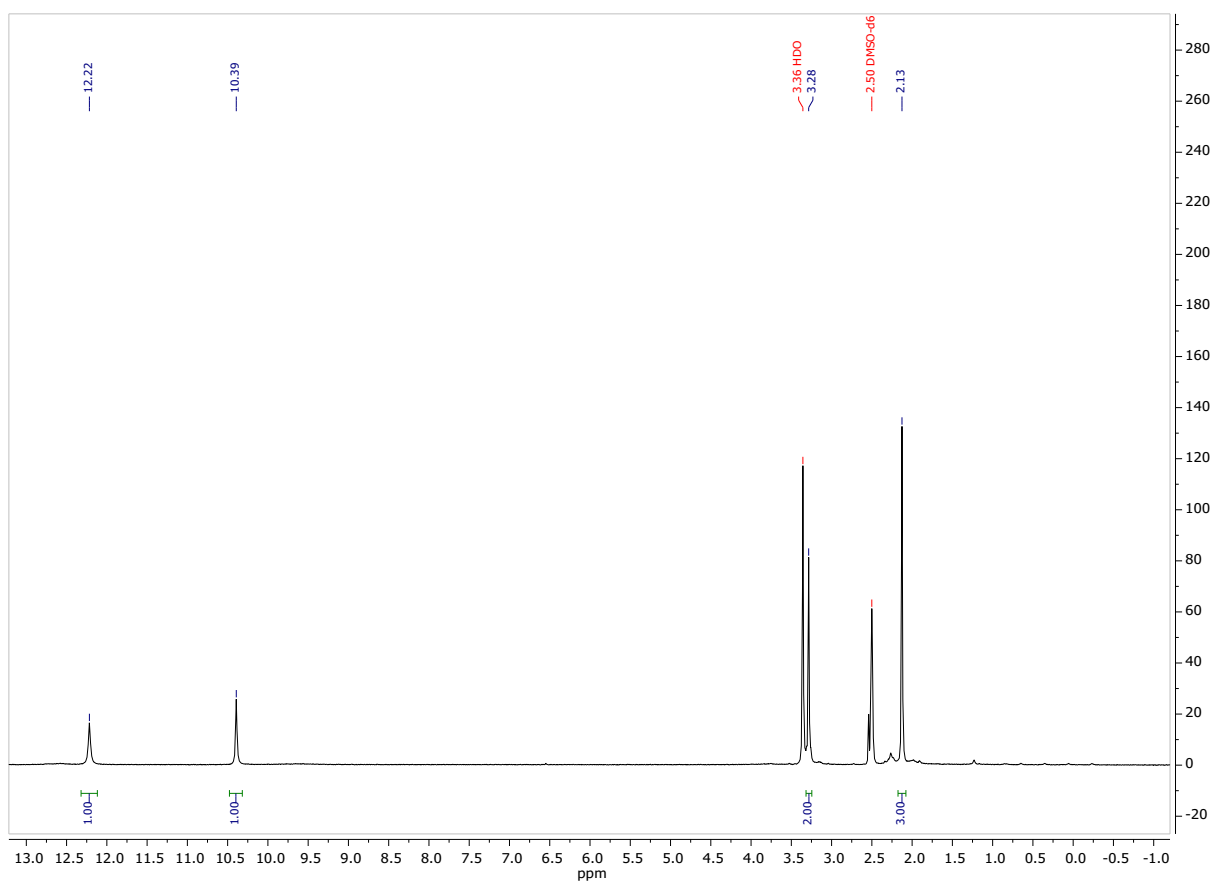

**Figure-111:**  $^{77}\text{Se}$  NMR spectrum (57 MHz) of **6l** in  $\text{DMSO-}d_6$

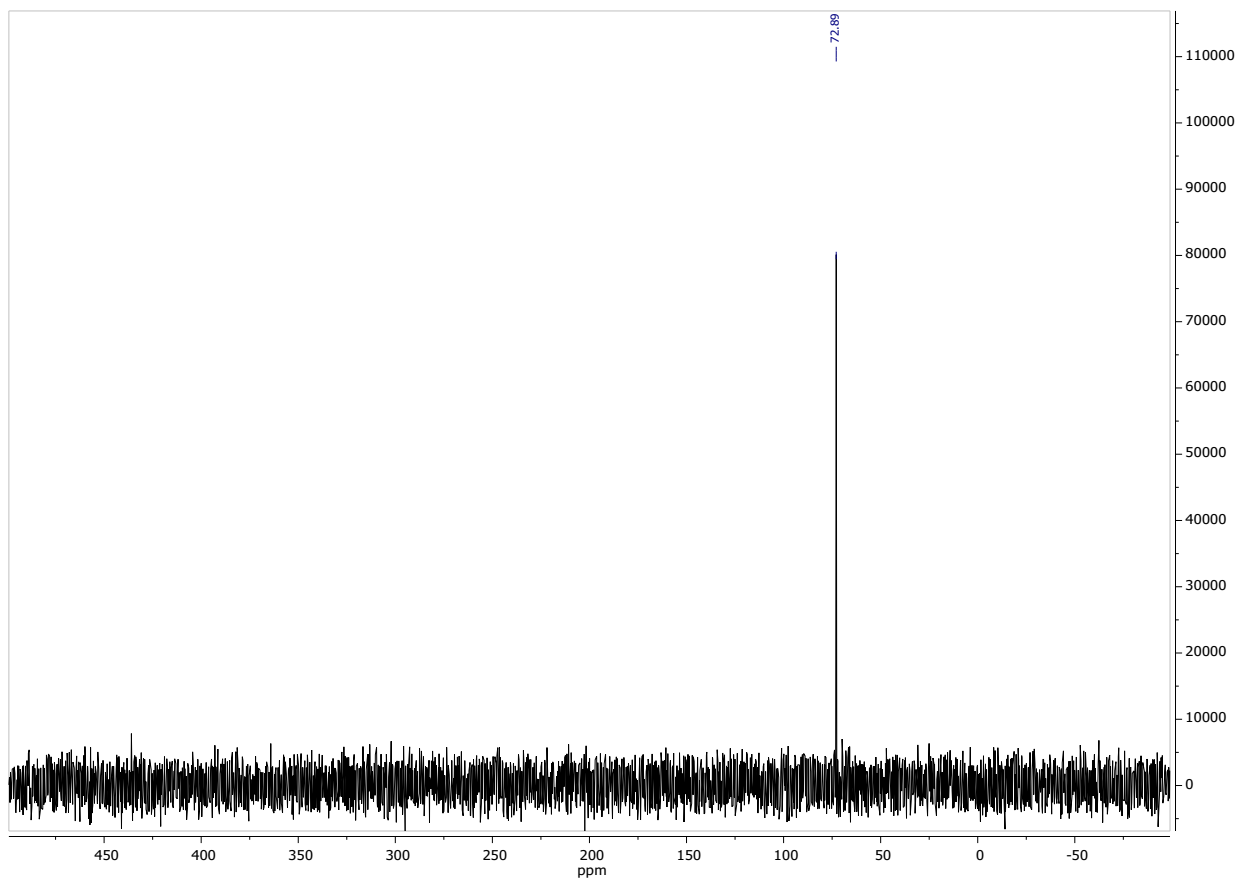

**Figure-112:**  $^{13}\text{C}$  NMR spectrum (76 MHz) of **6l** in  $\text{DMSO-}d_6$

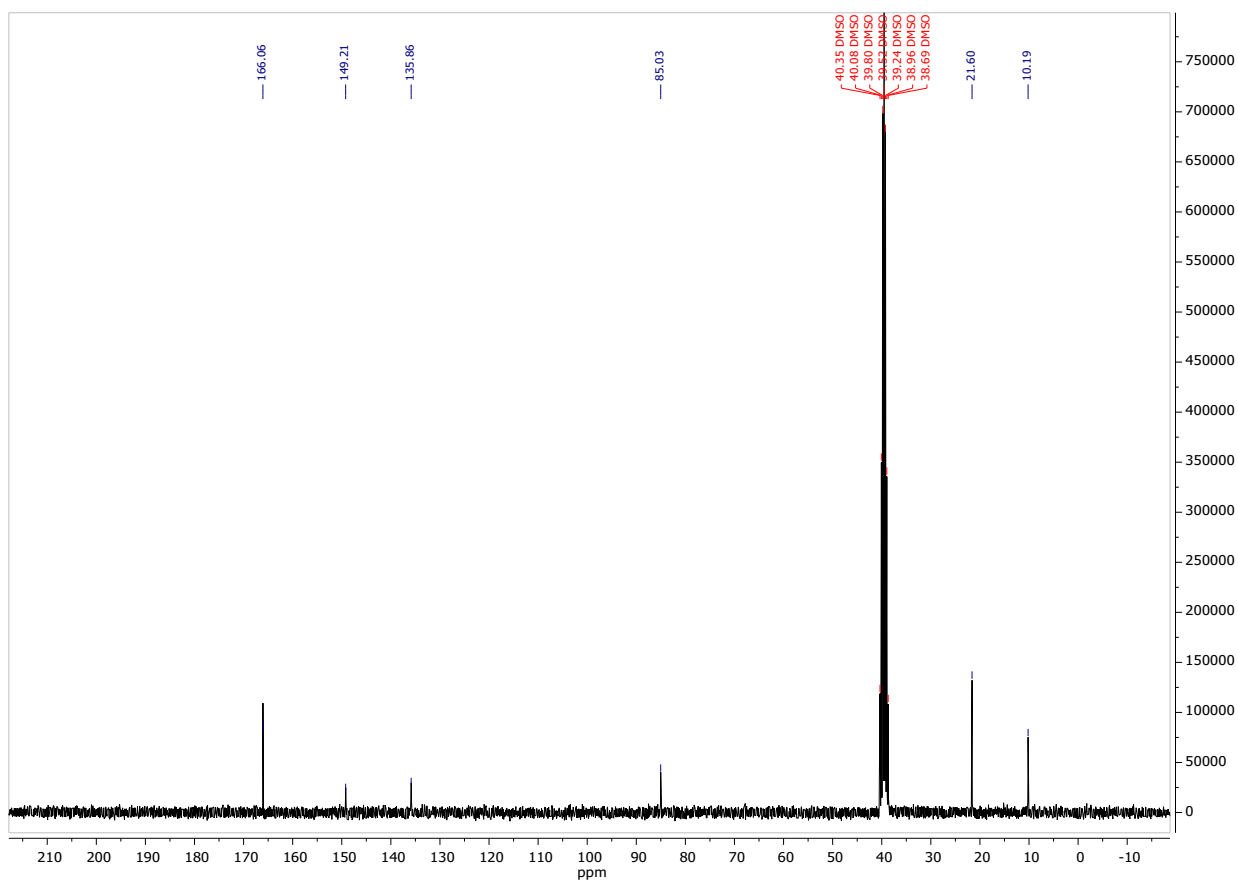

**Figure-113:** HRMS spectrum of compound **6I**

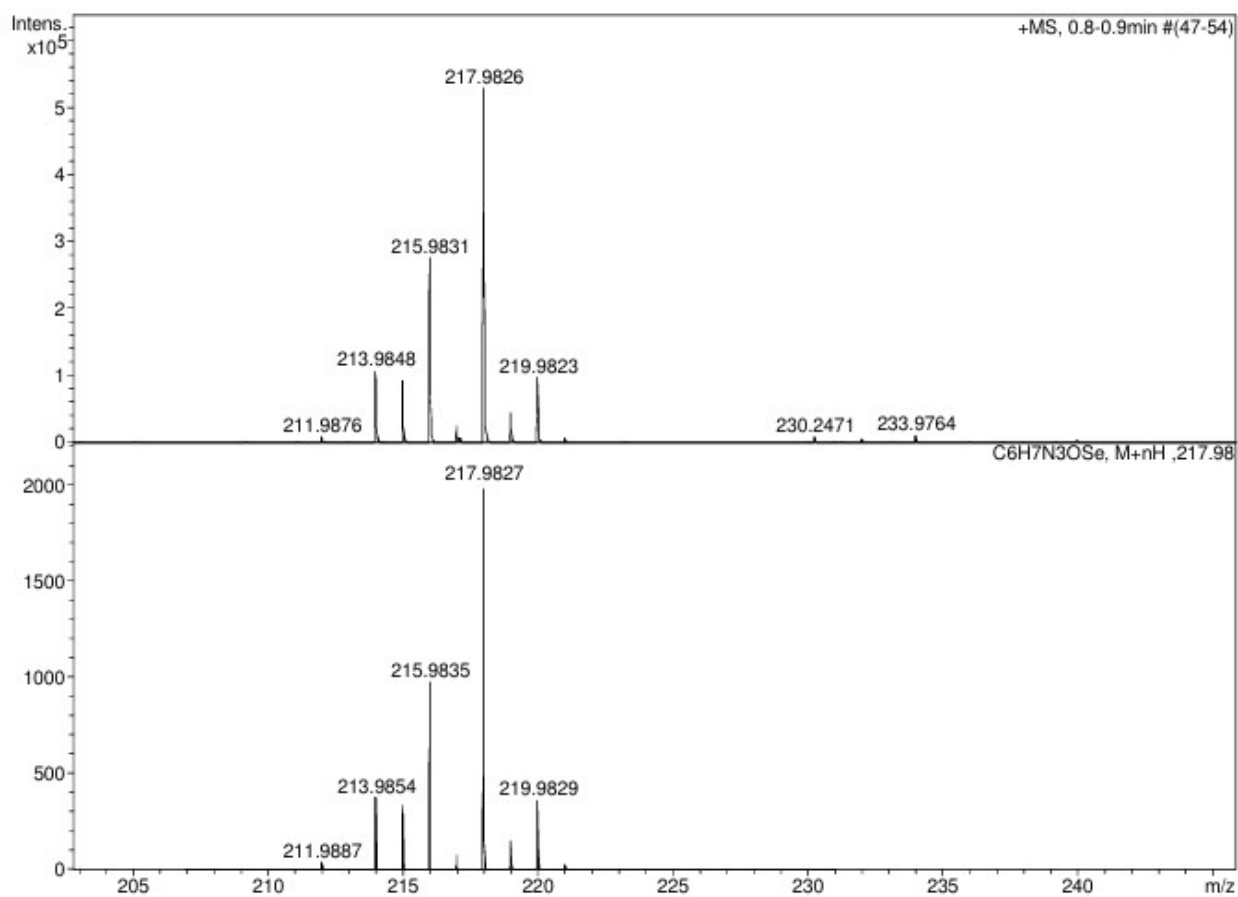

## NMR and HRMS spectra of compound 7

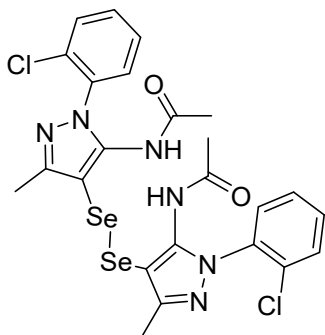

*N,N'*-(diselanediylobis(1-(2-chlorophenyl)-3-methyl-1H-pyrazole-4,5-diyl))diacetamide, **7**

Yellow powder, m.p. 147-149°C, yield 66% (0.17 g)

$^1\text{H}$  NMR (300 MHz,  $\text{DMSO-}d_6$ )  $\delta$  9.90 (s, 2H), 7.67 – 7.60 (m, 2H), 7.53 – 7.46 (m, 4H), 7.40 – 7.35 (m, 2H), 2.11 (s, 6H), 1.85 (s, 6H).  $^{77}\text{Se}$  NMR (57 MHz, DMSO)  $\delta$  327.22.  $^{13}\text{C}\{^1\text{H}\}$  NMR (76 MHz, DMSO)  $\delta$  169.12, 152.08, 140.81, 135.98, 130.77, 130.44, 130.06, 129.56, 127.84, 99.81, 22.37, 13.03. HRMS (ESI-TOF):  $m/z$   $[\text{M}+\text{H}]^+$ : calcd for  $[\text{C}_{24}\text{H}_{23}\text{Cl}_2\text{N}_6\text{O}_2\text{Se}_2]^+$ : 656.9590; found: 656.9588.

**Figure-114:**  $^1\text{H}$  NMR spectrum (300 MHz) of **7** in  $\text{DMSO-}d_6$

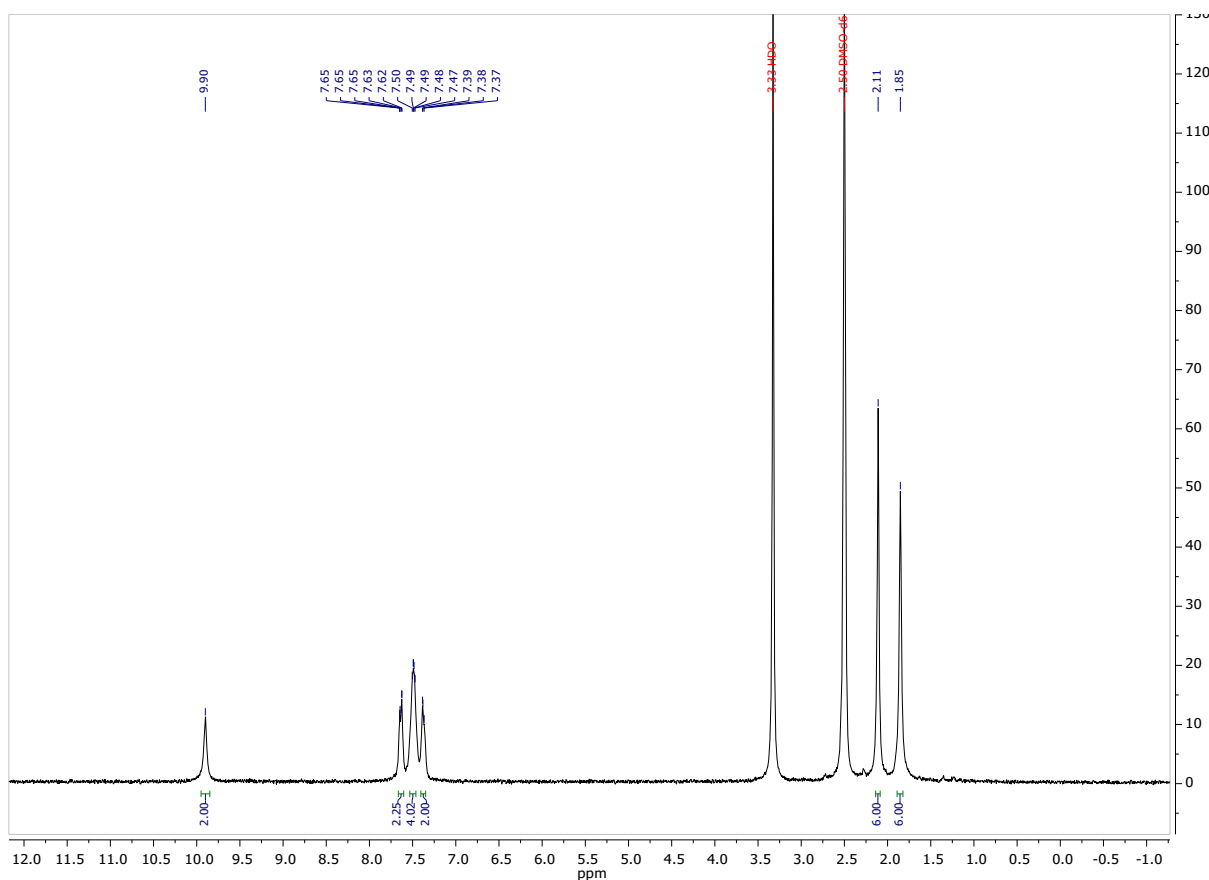

**Figure-115:**  $^{77}\text{Se}$  NMR spectrum (57 MHz) of **7** in  $\text{DMSO-}d_6$

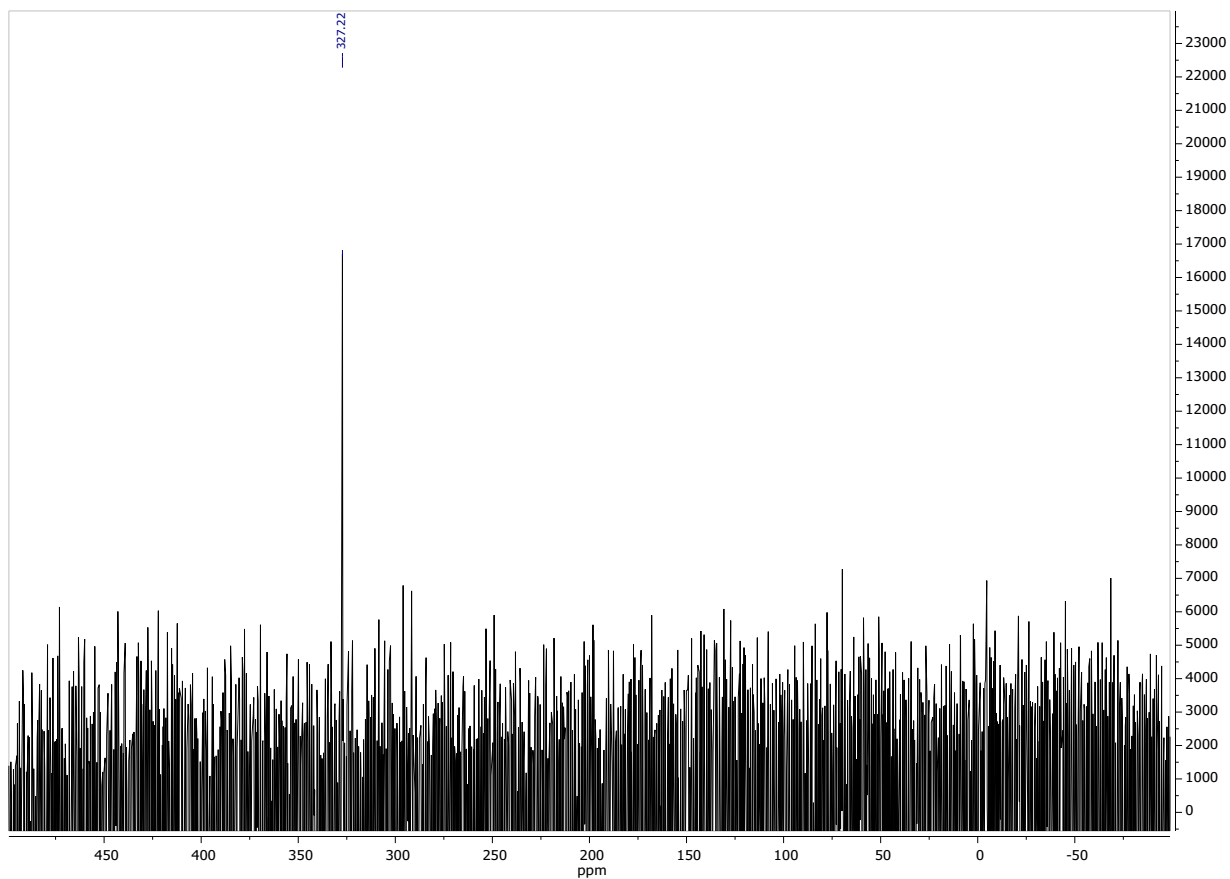

**Figure-116:**  $^{13}\text{C}$  NMR spectrum (76 MHz) of **7** in  $\text{DMSO-}d_6$

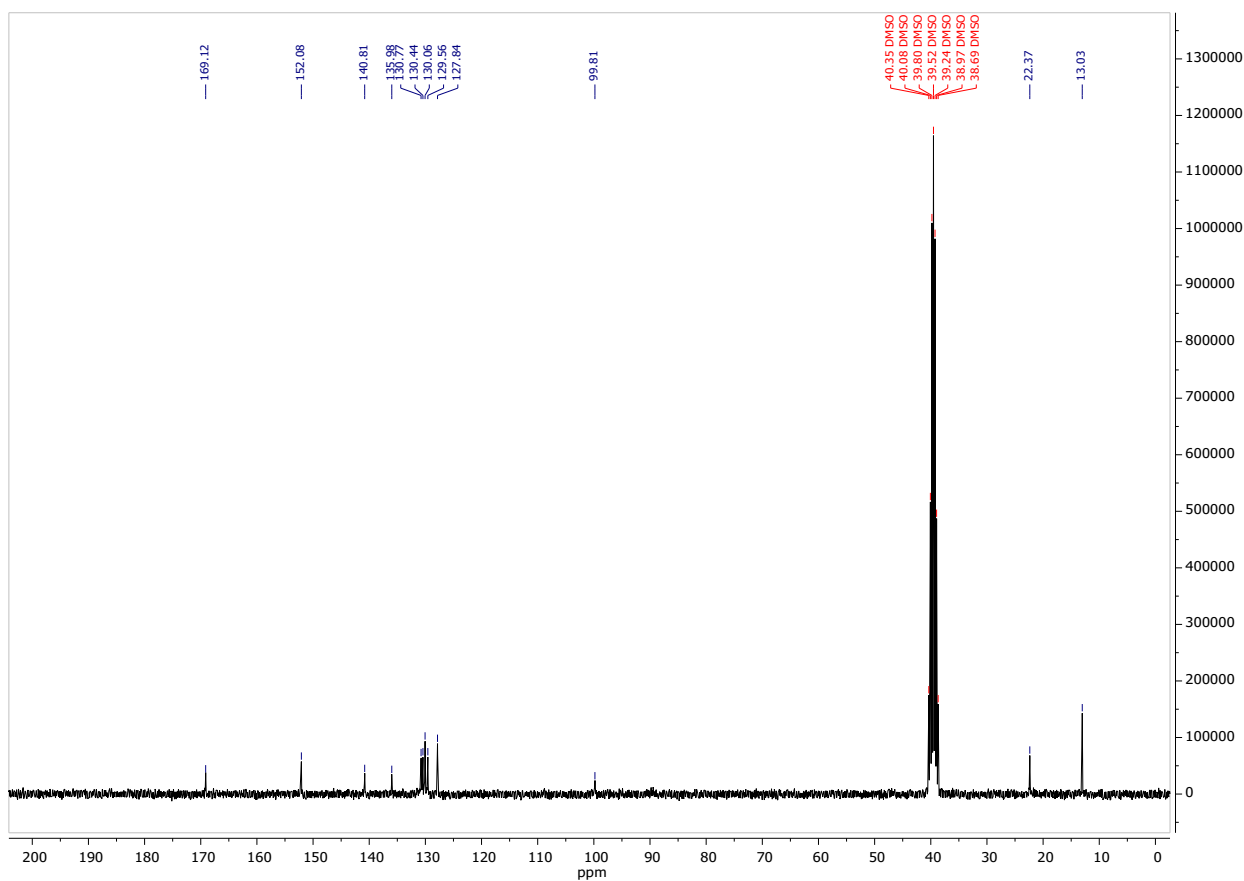

**Figure-117:** HRMS spectrum of compound 7

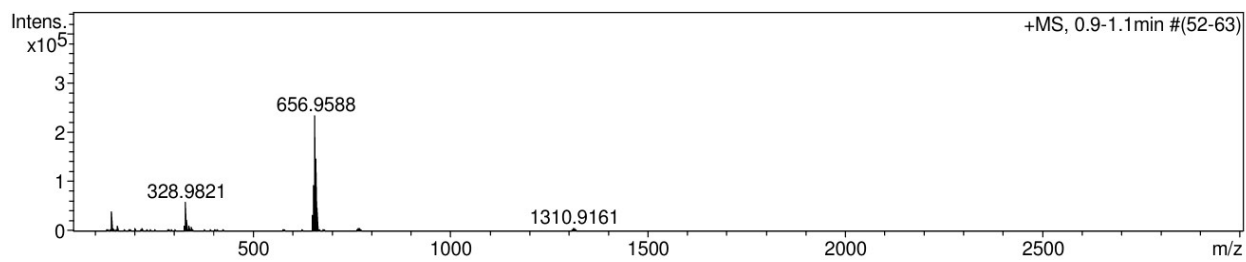

## NMR and HRMS spectra of compound **8**

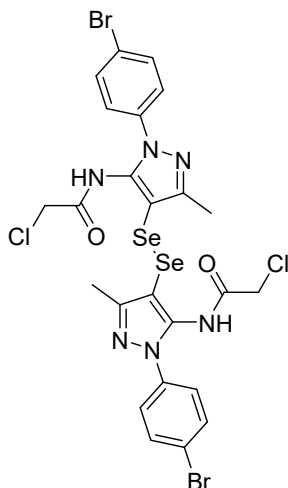

*N,N'*-(diselanediyldis(1-(4-bromophenyl)-3-methyl-1H-pyrazole-4,5-diyl))bis(2-chloroacetamide), **8**

Yellow powder, m.p. 217-219°C, yield 63% (0.20 g)

$^1\text{H}$  NMR (300 MHz, DMSO- $d_6$ )  $\delta$  10.37 (s, 2H), 7.68 (d,  $J = 8.8$  Hz, 4H), 7.44 (d,  $J = 8.8$  Hz, 4H), 4.21 (s, 4H), 2.13 (s, 6H).  $^{77}\text{Se}$  NMR (57 MHz, DMSO)  $\delta$  328.64.  $^{13}\text{C}\{^1\text{H}\}$  NMR (75 MHz, DMSO- $d_6$ )  $\delta$  166.25, 152.34, 138.21, 137.56, 132.21, 124.86, 120.42, 102.44, 42.24, 12.98. HRMS (ESI-TOF):  $m/z$   $[\text{M}+\text{H}]^+$ : calcd for  $[\text{C}_{24}\text{H}_{21}\text{Br}_2\text{Cl}_2\text{N}_6\text{O}_2\text{Se}_2]^+$ : 814.7766; found: 814.7774.

**Figure-118:**  $^1\text{H}$  NMR spectrum (300 MHz) of **8** in DMSO- $d_6$

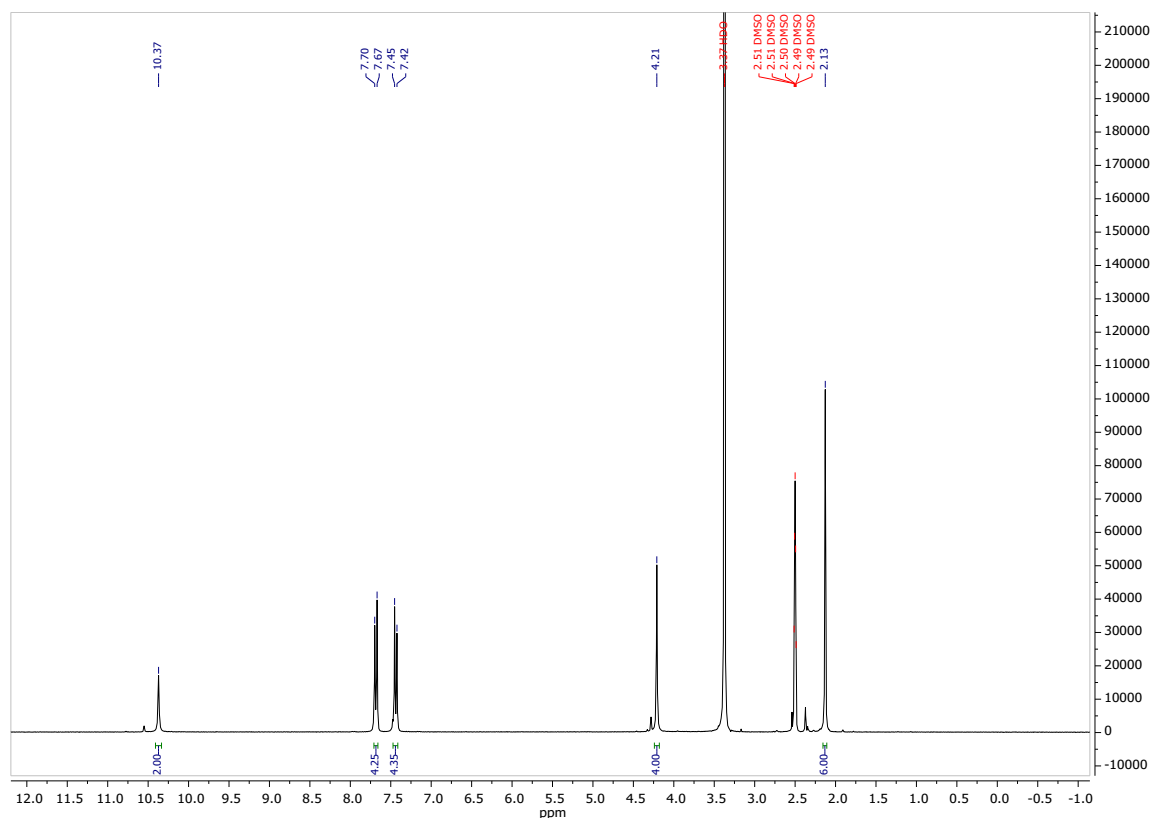

**Figure-119:**  $^{77}\text{Se}$  NMR spectrum (57 MHz) of **8** in  $\text{DMSO-}d_6$

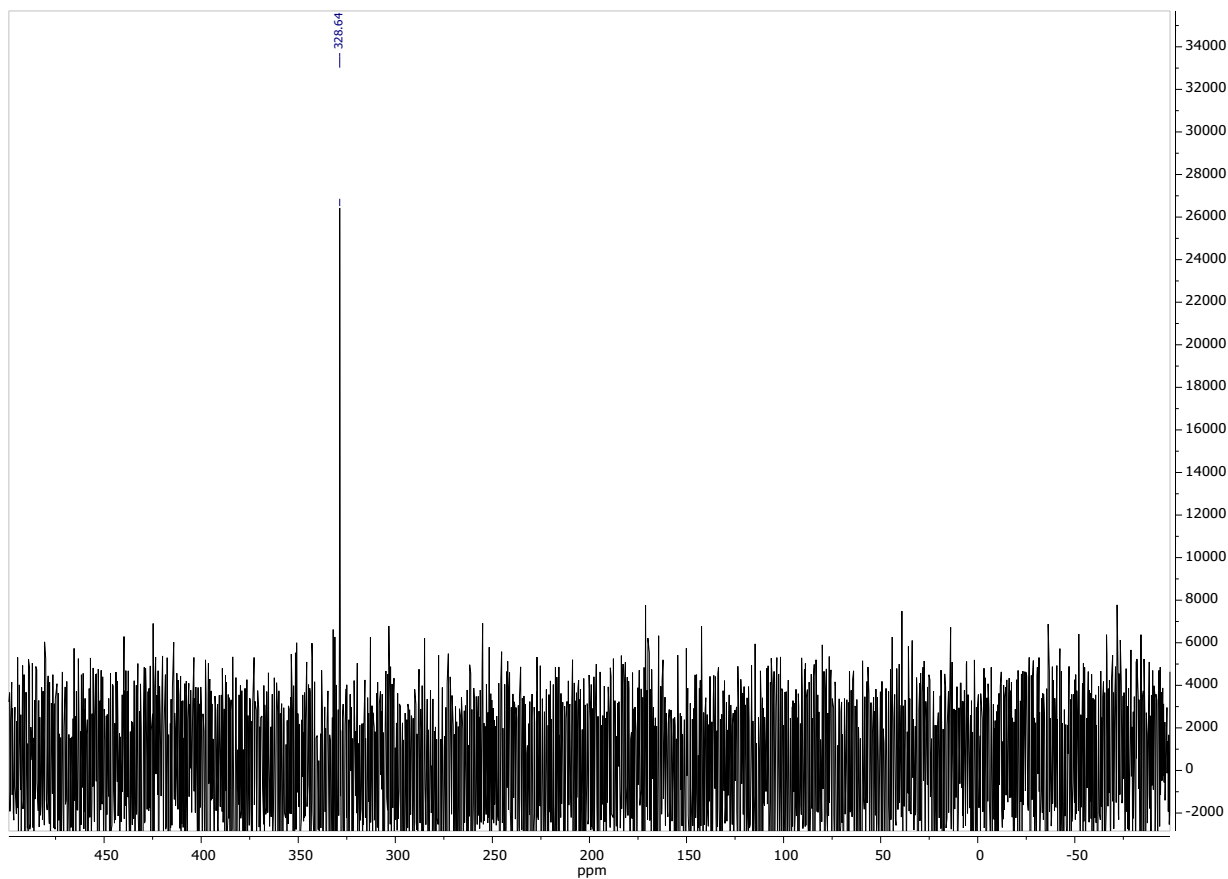

**Figure-120:**  $^{13}\text{C}$  NMR spectrum (76 MHz) of **8** in  $\text{DMSO-}d_6$

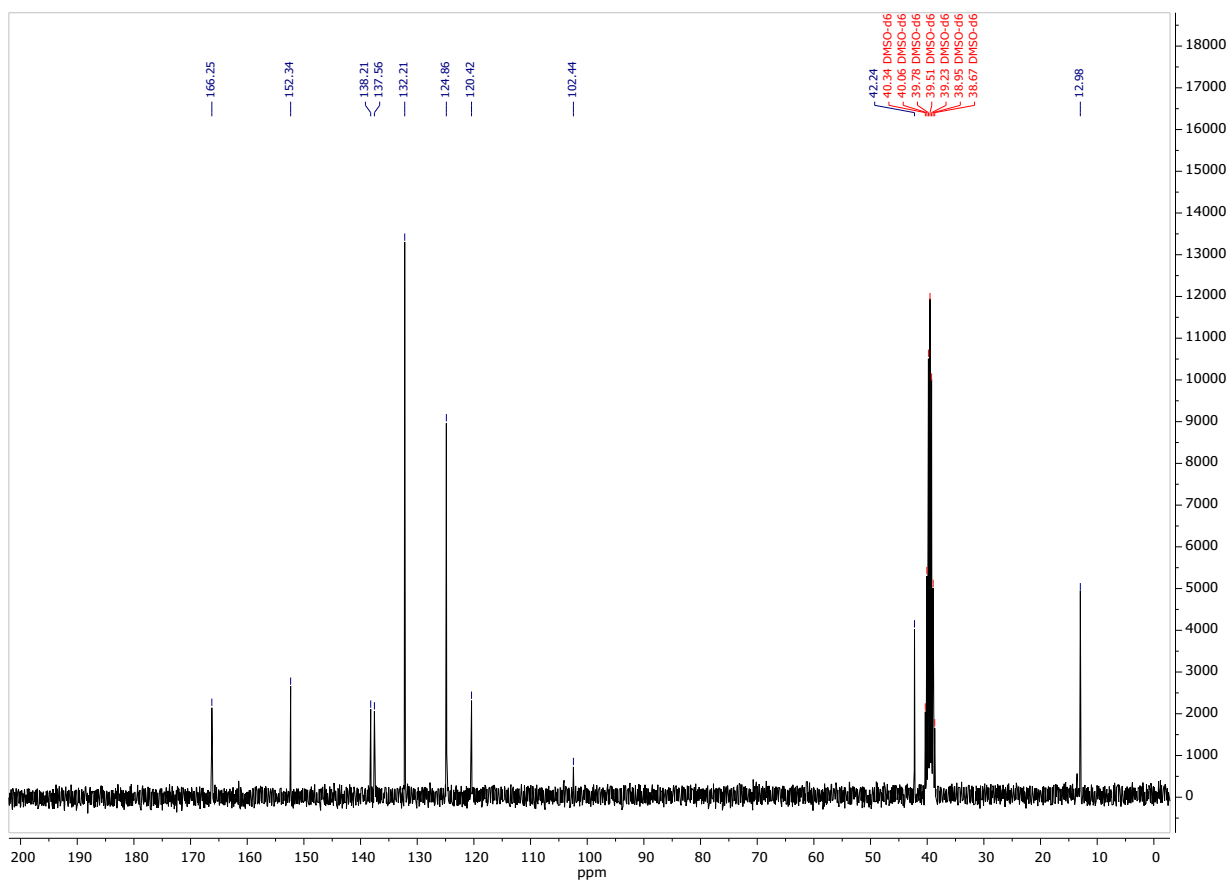

**Figure-121:** HRMS spectrum of compound **8**

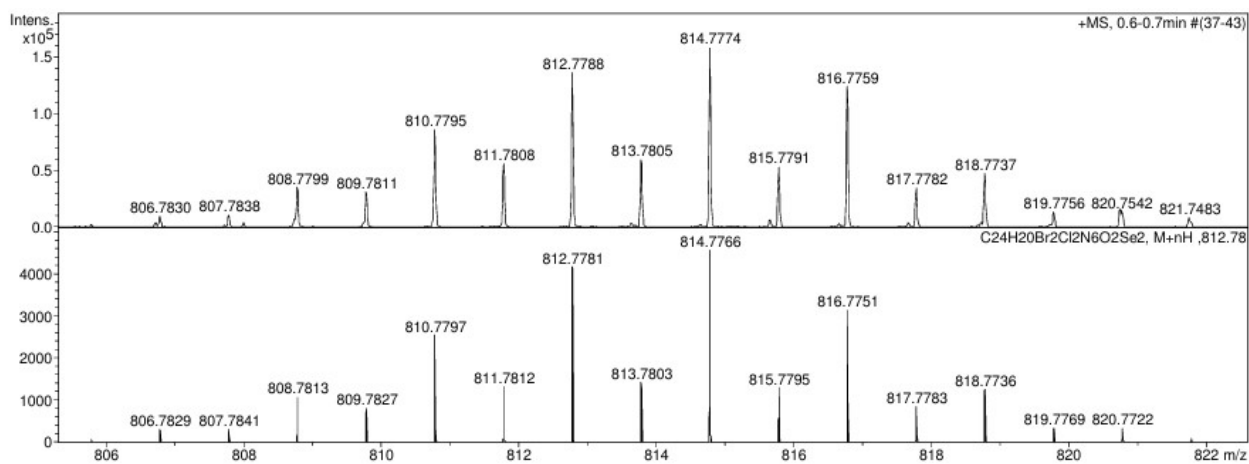

## NMR and HRMS spectra of compound 9

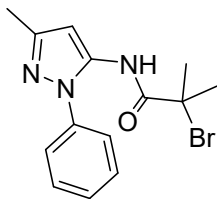

### 2-Bromo-2-methyl-N-(3-methyl-1-phenyl-1H-pyrazol-5-yl)propanamide, **9**

White powder, m.p. 118-120°C, yield 76% (0.98 g)

$^1\text{H}$  NMR (300 MHz,  $\text{DMSO-}d_6$ )  $\delta$  9.98 (s, 1H), 7.51 – 7.42 (m, 4H), 7.36 – 7.30 (m, 1H), 6.16 (s, 1H), 2.23 (s, 3H), 1.87 (s, 6H).  $^{13}\text{C}\{^1\text{H}\}$  NMR (76 MHz,  $\text{DMSO}$ )  $\delta$  170.27, 147.94, 138.64, 135.60, 128.94, 126.98, 123.08, 104.06, 59.37, 30.71, 13.83. HRMS (ESI-TOF):  $m/z$   $[\text{M}+\text{H}]^+$ : calcd for  $[\text{C}_{14}\text{H}_{17}\text{BrN}_3\text{O}]^+$ : 322.0550; found: 322.0546.

**Figure-122:**  $^1\text{H}$  NMR spectrum (300 MHz) of **9** in  $\text{DMSO-}d_6$

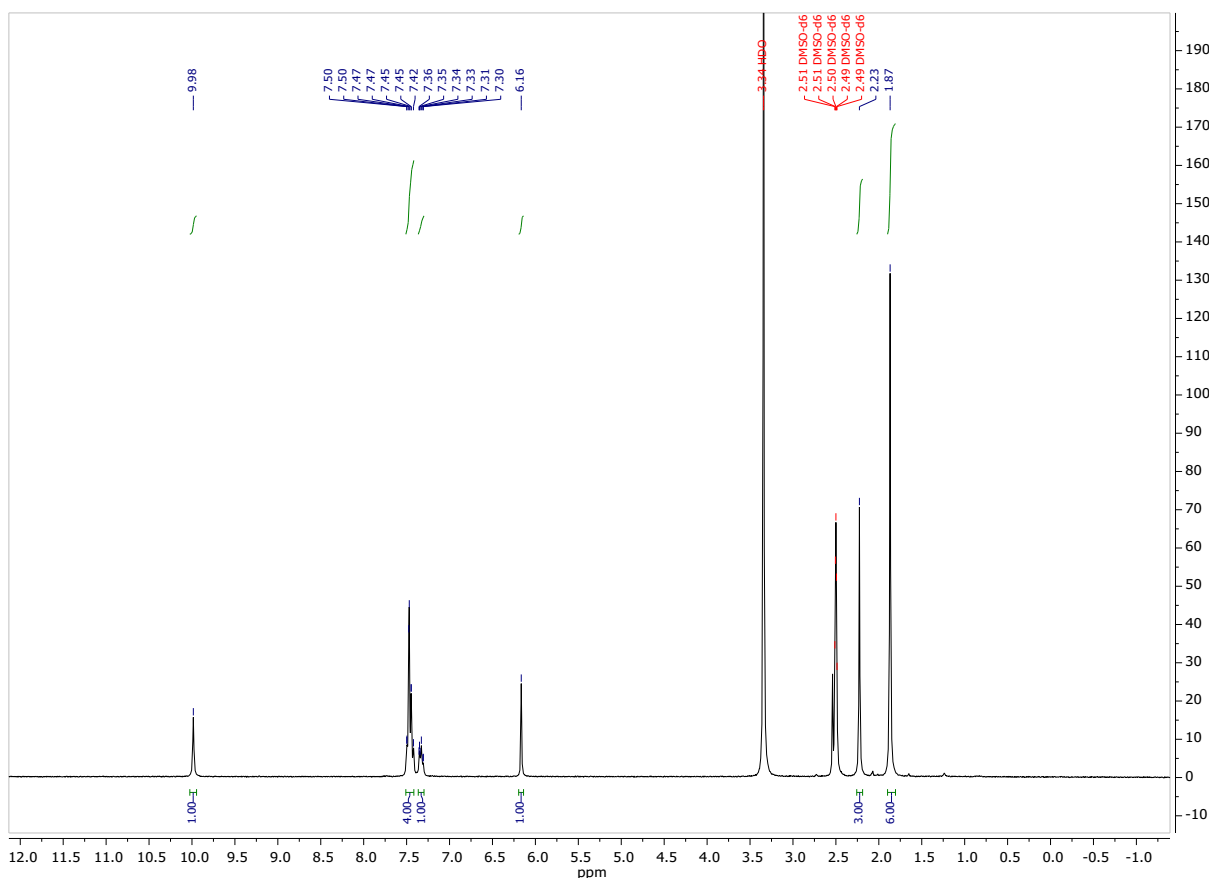

**Figure-123:**  $^{13}\text{C}$  NMR spectrum (76 MHz) of **9** in  $\text{DMSO-}d_6$

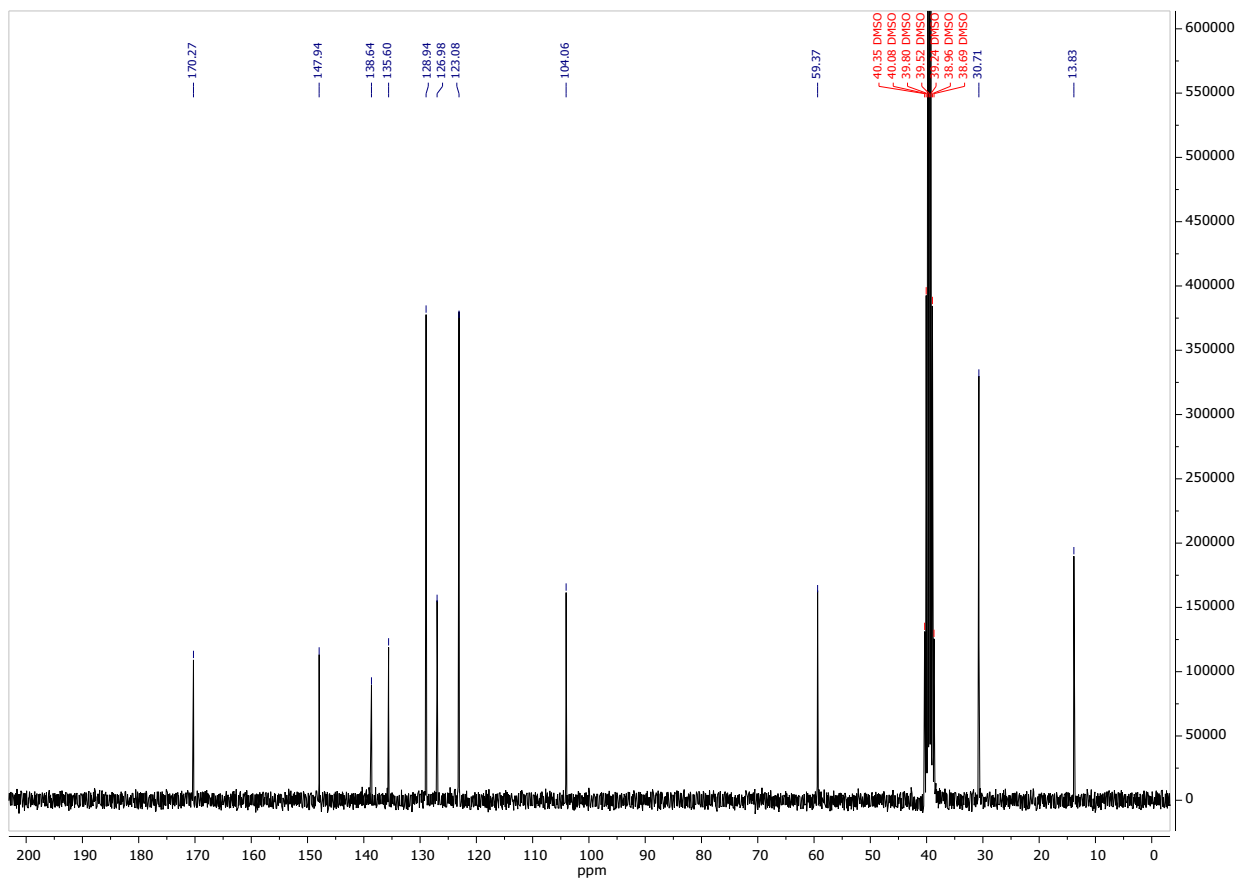

**Figure-124:** HRMS spectrum of compound **9**

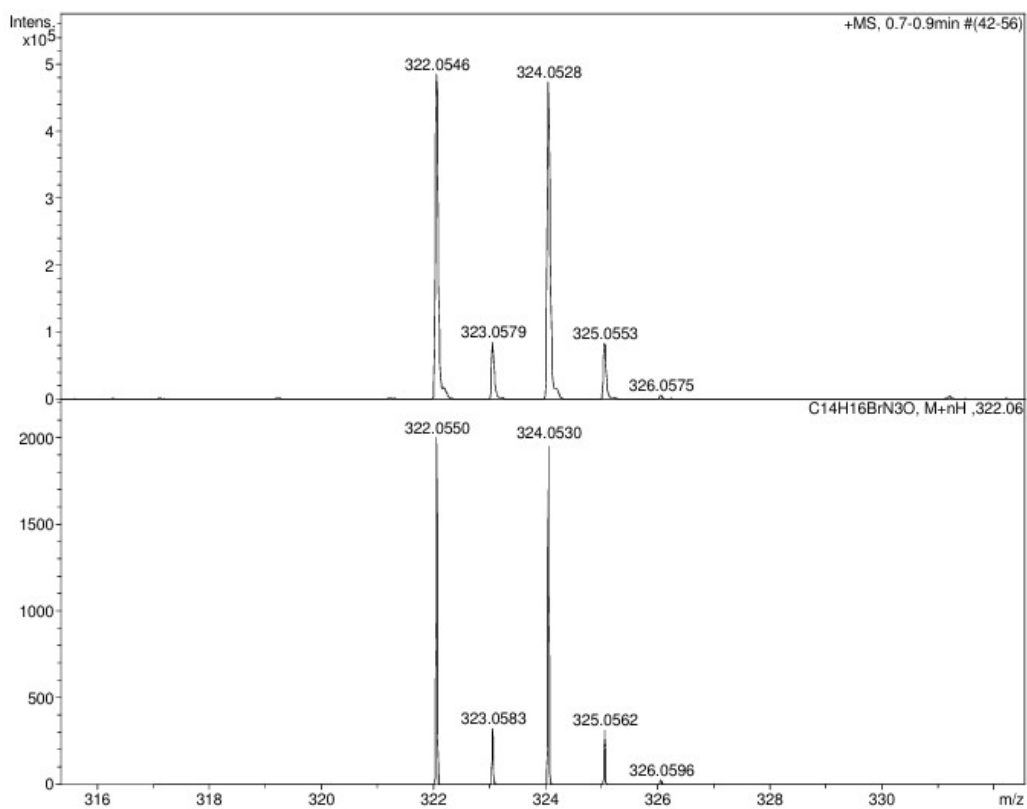

## NMR and HRMS spectra of compound **10**

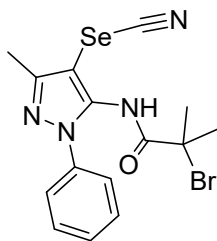

### *2-Bromo-2-methyl-N-(3-methyl-1-phenyl-4-selenocyanato-1H-pyrazol-5-yl)propanamide, 10*

Grey powder, m.p. 122-124°C, yield 76% (0.97 g)

$^1\text{H}$  NMR (300 MHz, DMSO- $d_6$ )  $\delta$  10.45 (s, 1H), 7.55 – 7.46 (m, 4H), 7.44 – 7.37 (m, 1H), 2.36 (s, 3H), 1.91 (s, 6H).  $^{77}\text{Se}$  NMR (57 MHz, DMSO)  $\delta$  157.12.  $^{13}\text{C}\{^1\text{H}\}$  NMR (76 MHz, DMSO)  $\delta$  170.78, 150.84, 138.58, 138.08, 129.19, 128.00, 123.19, 102.99, 95.08, 58.68, 30.64, 13.12. HRMS (ESI-TOF):  $m/z$   $[\text{M}+\text{H}]^+$ : calcd for  $[\text{C}_{15}\text{H}_{16}\text{BrN}_4\text{OSe}]^+$ : 426.9664; found: 426.9669.

**Figure-125:**  $^1\text{H}$  NMR spectrum (300 MHz) of **10** in DMSO- $d_6$

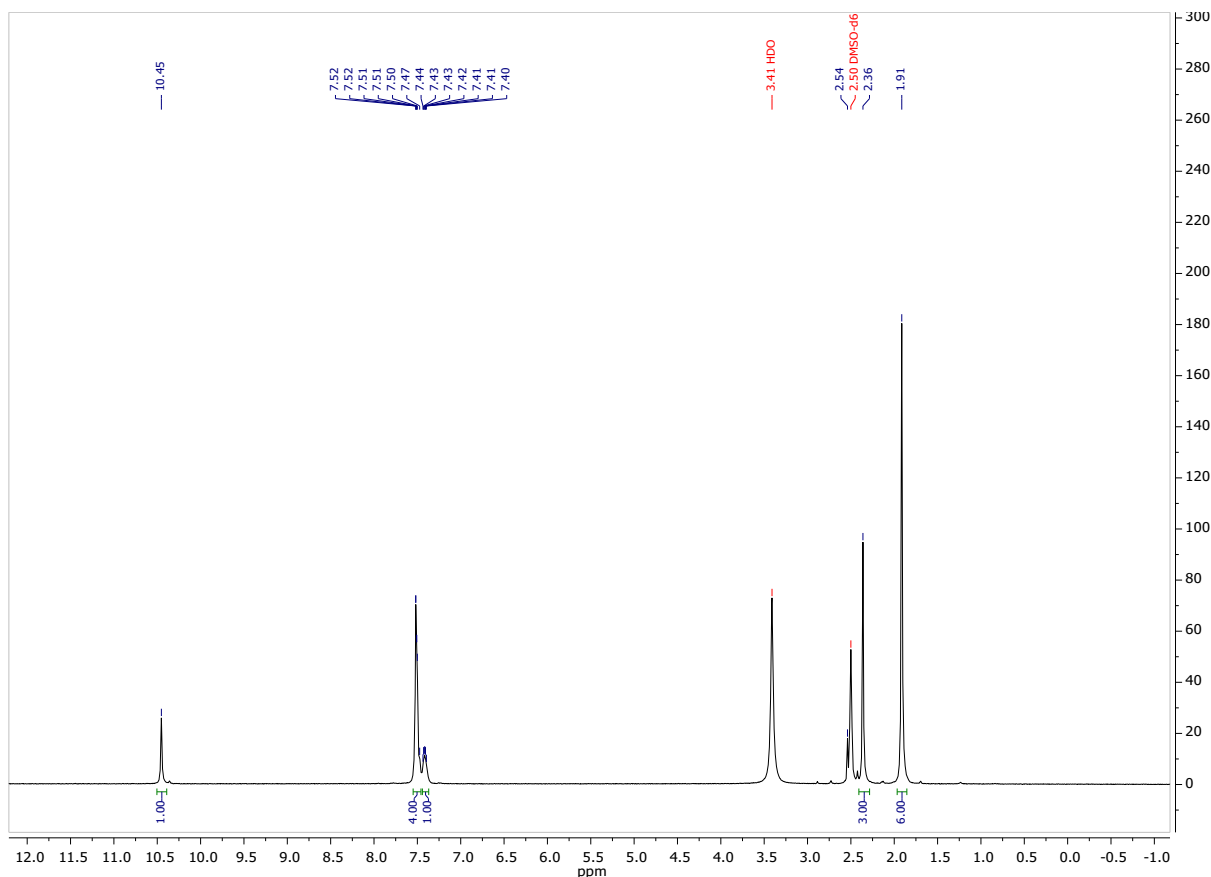

**Figure-126:**  $^{77}\text{Se}$  NMR spectrum (57 MHz) of **10** in  $\text{DMSO-}d_6$

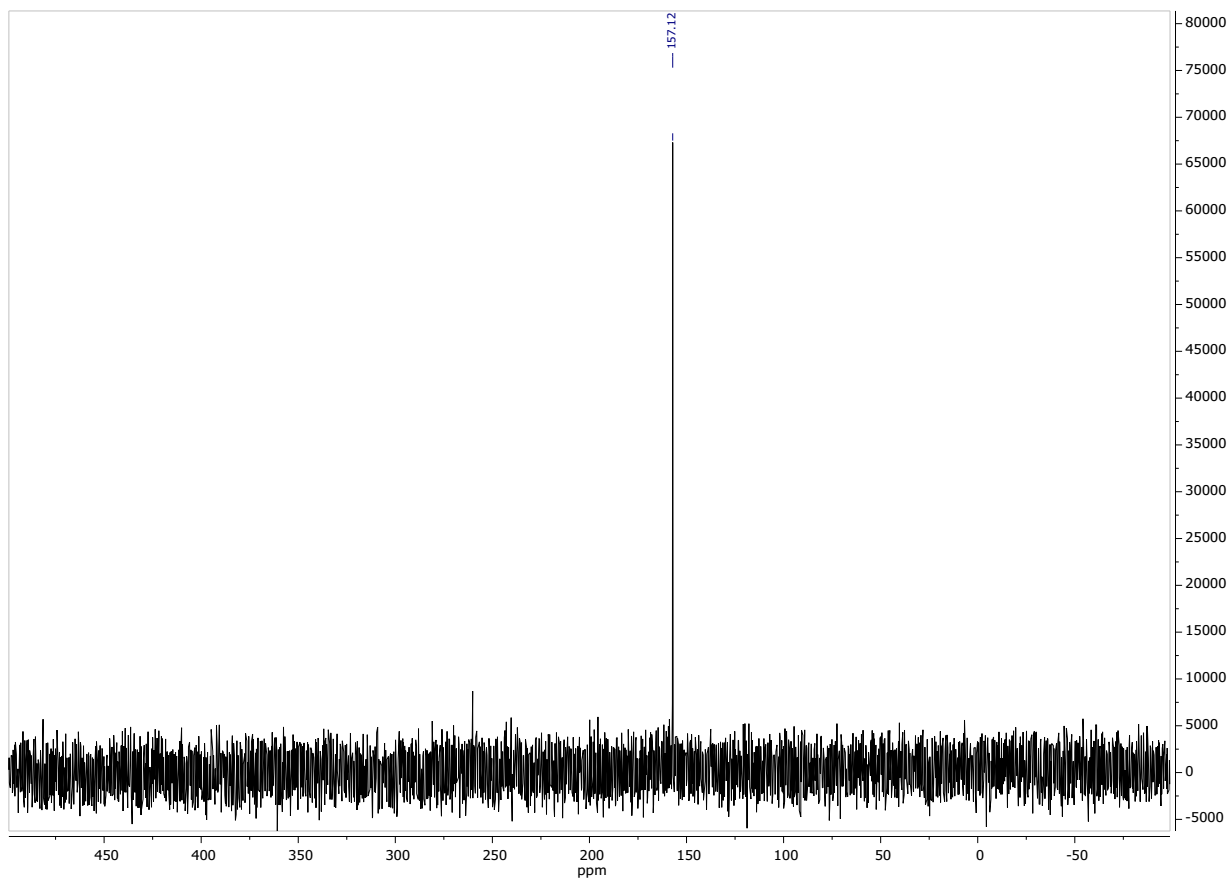

**Figure-127:**  $^{13}\text{C}$  NMR spectrum (76 MHz) of **10** in  $\text{DMSO-}d_6$

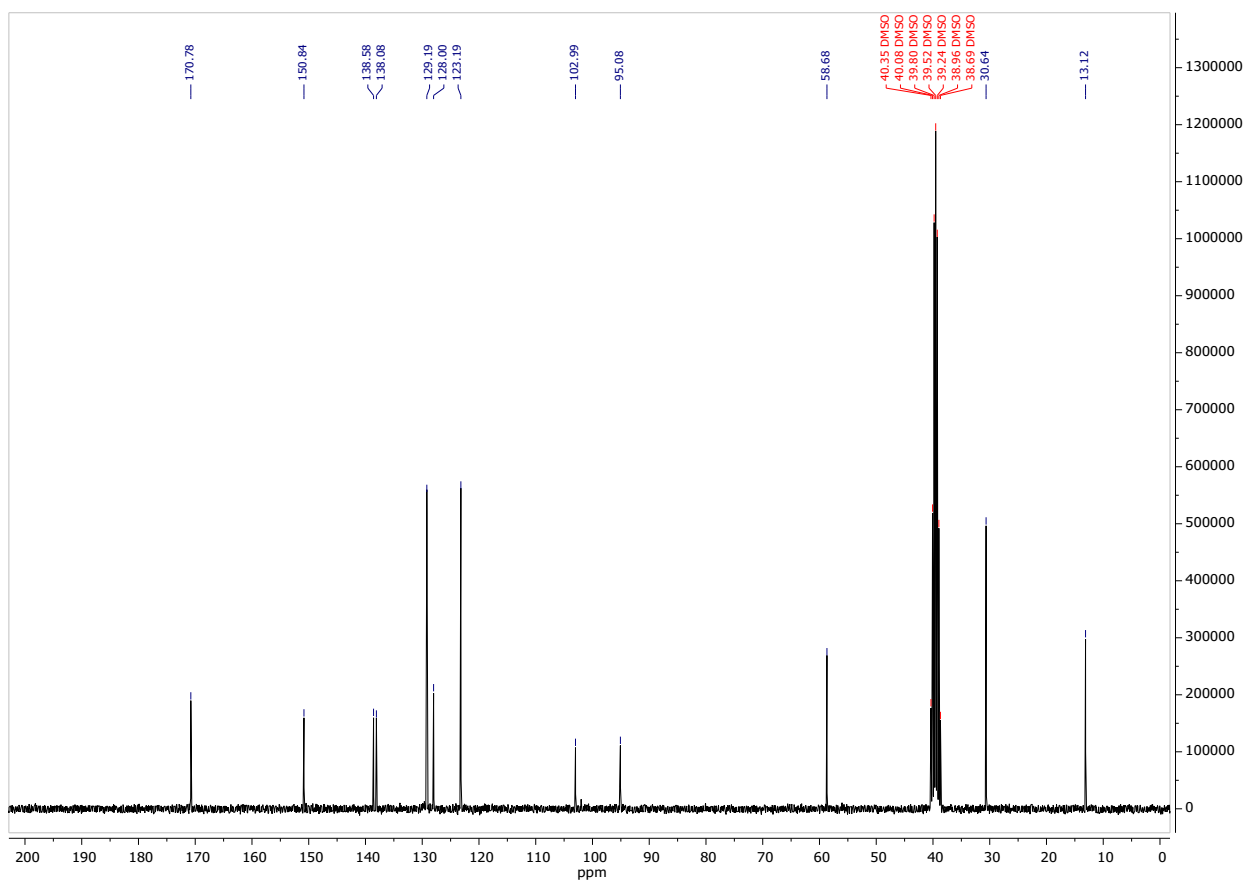

**Figure-128:** HRMS spectrum of compound **10**

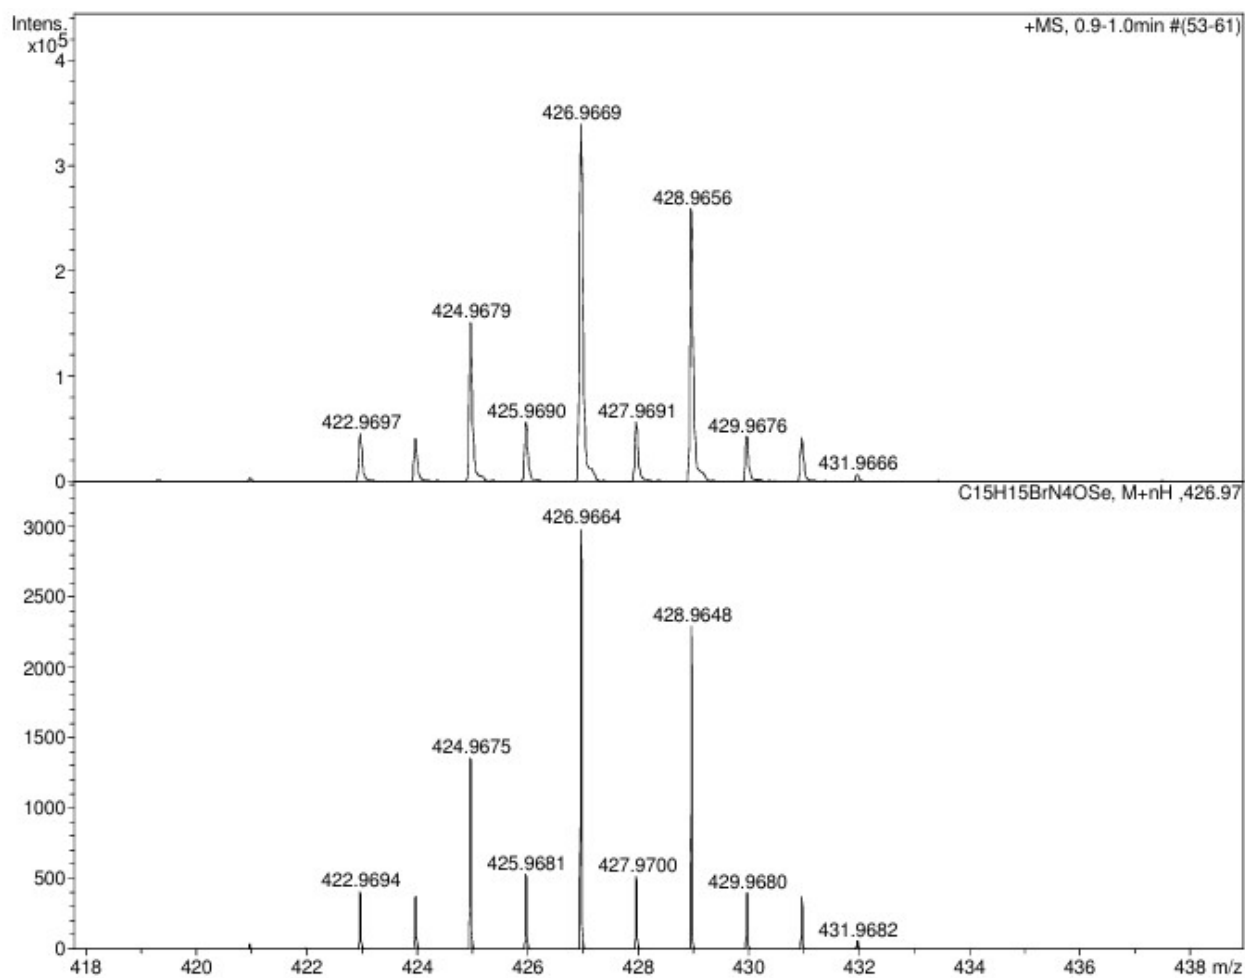

## NMR and HRMS spectra of compound 11

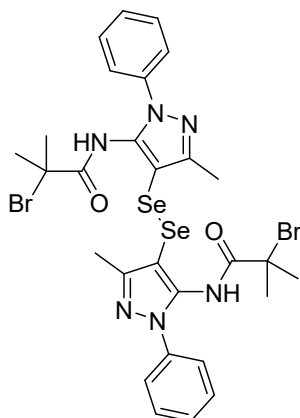

*N,N'*-(diselanediy)bis(3-methyl-1-phenyl-1*H*-pyrazole-4,5-diyl)bis(2-bromo-2-methylpropanamide), **11**

Yellow powder, m.p. 151-153°C, yield 59% (0.19 g)

$^1\text{H}$  NMR (300 MHz, DMSO- $d_6$ )  $\delta$  9.70 (s, 2H), 7.52 – 7.45 (m, 8H), 7.40 – 7.34 (m, 2H), 2.26 (s, 6H), 1.73 (s, 12H).  $^{77}\text{Se}$  NMR (57 MHz, DMSO)  $\delta$  326.99.  $^{13}\text{C}\{^1\text{H}\}$  NMR (76 MHz, DMSO)  $\delta$  171.10, 152.21, 138.35, 138.13, 129.18, 127.65, 122.68, 103.43, 58.59, 30.60, 13.15. HRMS (ESI-TOF):  $m/z$   $[\text{M}+\text{H}]^+$ : calcd for  $[\text{C}_{28}\text{H}_{31}\text{Br}_2\text{N}_6\text{O}_2\text{Se}_2]^+$ : 800.9206; found: 800.9138.

**Figure-129:**  $^1\text{H}$  NMR spectrum (300 MHz) of **11** in DMSO- $d_6$

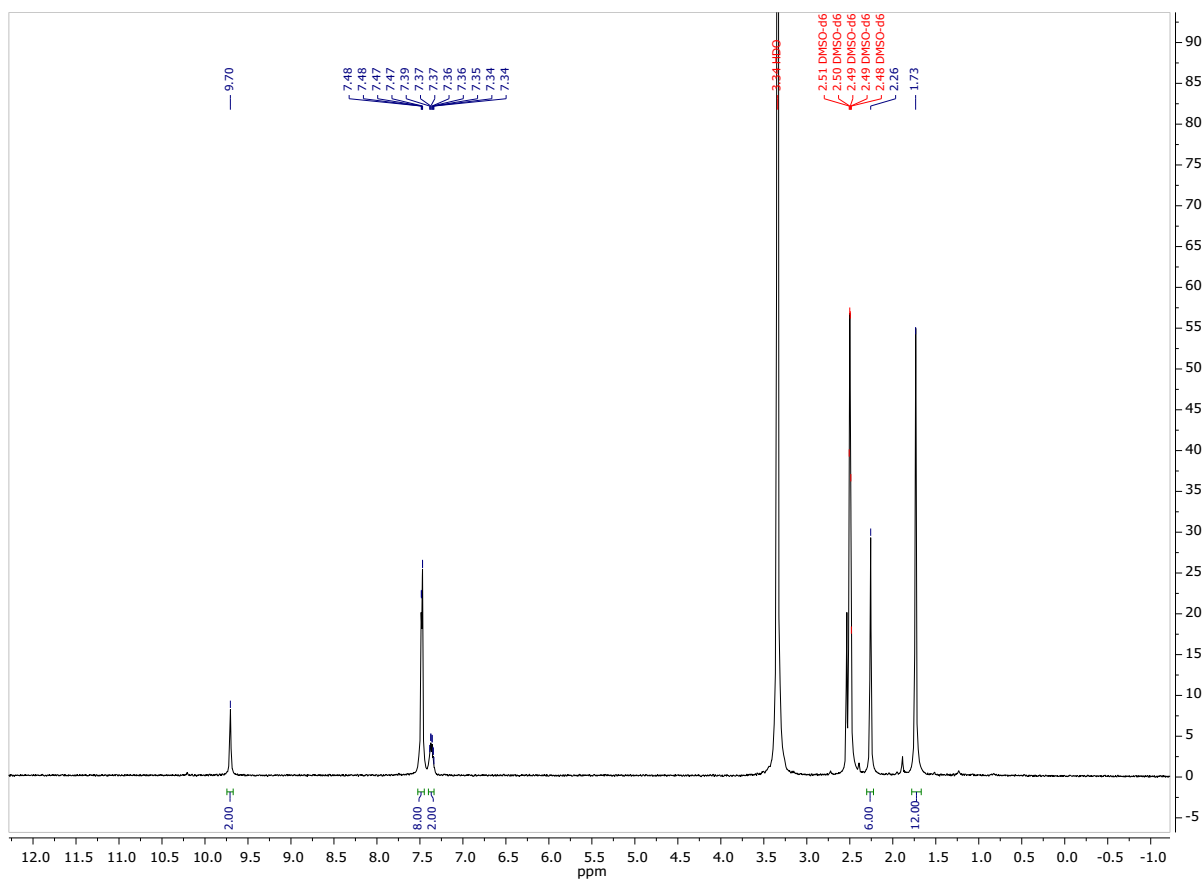

**Figure-130:**  $^{77}\text{Se}$  NMR spectrum (57 MHz) of **11** in  $\text{DMSO-}d_6$

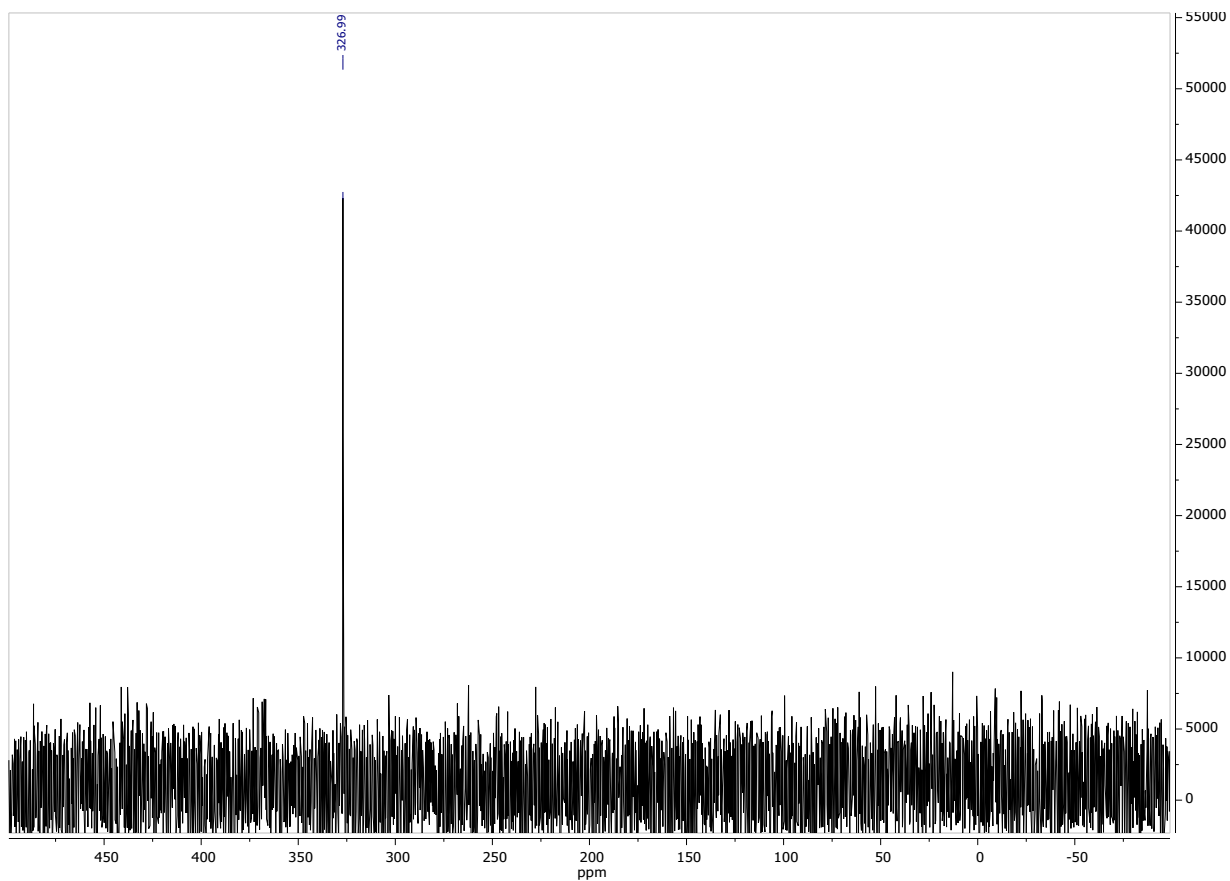

**Figure-131:**  $^{13}\text{C}$  NMR spectrum (76 MHz) of **11** in  $\text{DMSO-}d_6$

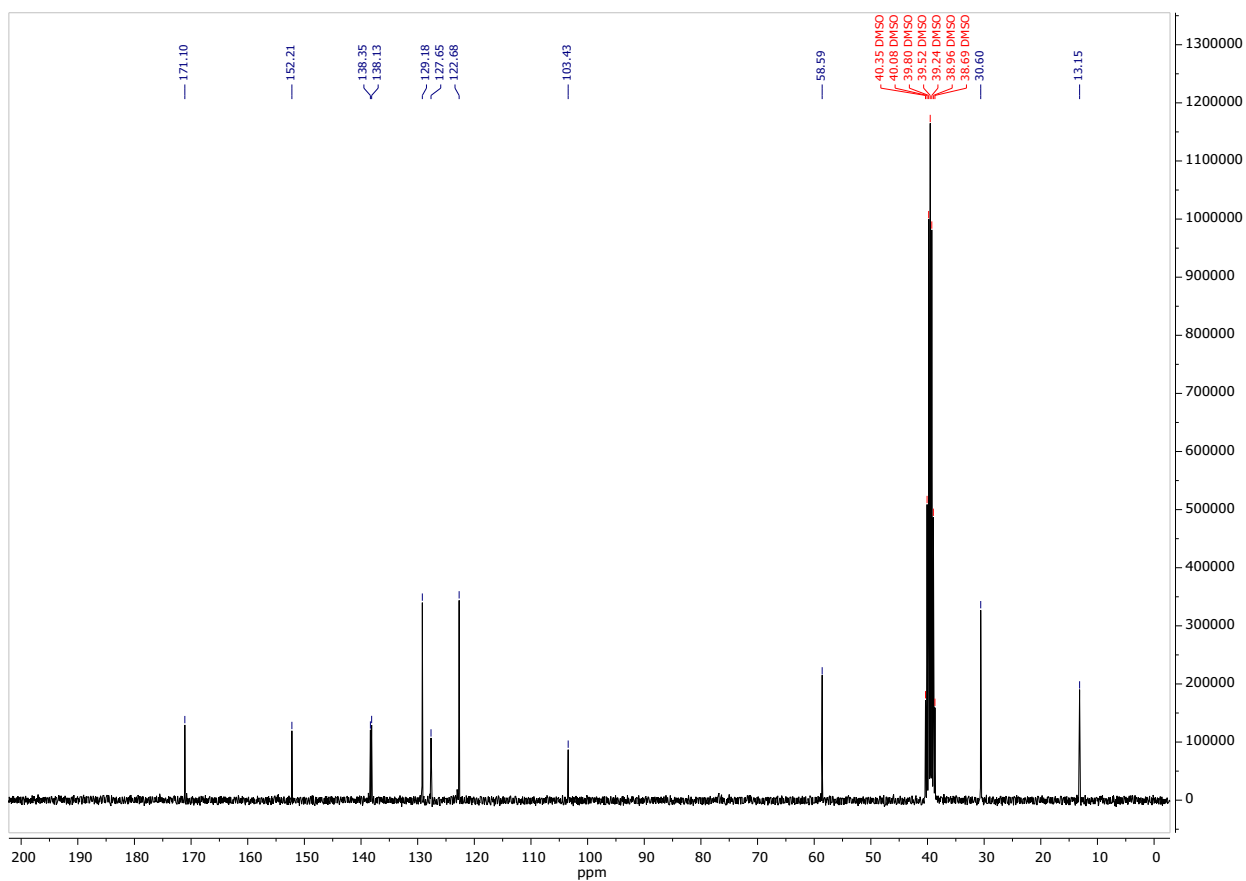

**Figure-132:** HRMS spectrum of compound **11**

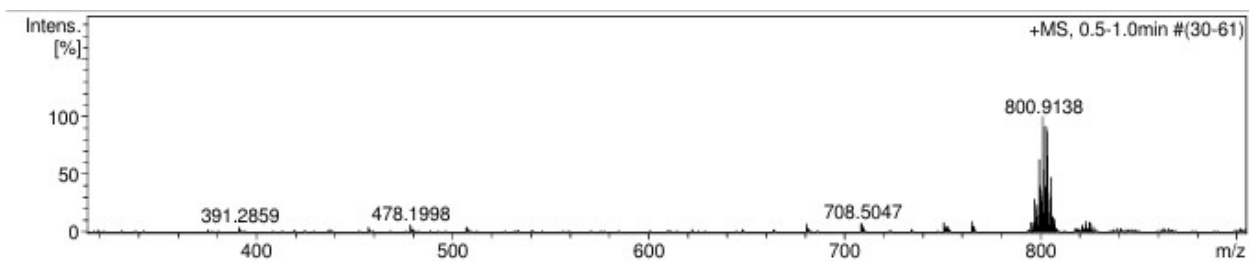

## NMR and HRMS spectra of compound 14

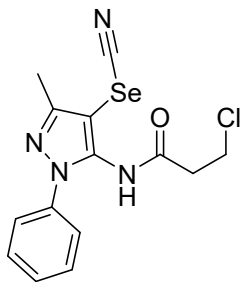

### 3-Chloro-N-(3-methyl-1-phenyl-4-selenocyanato-1H-pyrazol-5-yl)propanamide, 14

Grey powder, m.p. 124-126°C, yield 64% (0.71 g)

$^1\text{H}$  NMR (300 MHz, DMSO- $d_6$ )  $\delta$  10.56 (s, 1H), 7.54 – 7.48 (m, 4H), 7.46 – 7.39 (m, 1H), 3.82 (t,  $J = 6.1$  Hz, 2H), 2.85 (t,  $J = 6.1$  Hz, 2H), 2.35 (s, 3H).  $^{77}\text{Se}$  NMR (57 MHz, DMSO)  $\delta$  160.97.  $^{13}\text{C}\{^1\text{H}\}$  NMR (76 MHz, DMSO)  $\delta$  169.76, 150.57, 138.24, 137.99, 129.31, 128.04, 123.49, 103.34, 94.31, 40.30, 38.13, 13.11. HRMS (ESI-TOF):  $m/z$   $[\text{M}+\text{H}]^+$ : calcd for  $[\text{C}_{14}\text{H}_{14}\text{ClN}_4\text{OSe}]^+$ : 369.0014; found: 369.0022.

**Figure-133:**  $^1\text{H}$  NMR spectrum (300 MHz) of 14 in DMSO- $d_6$

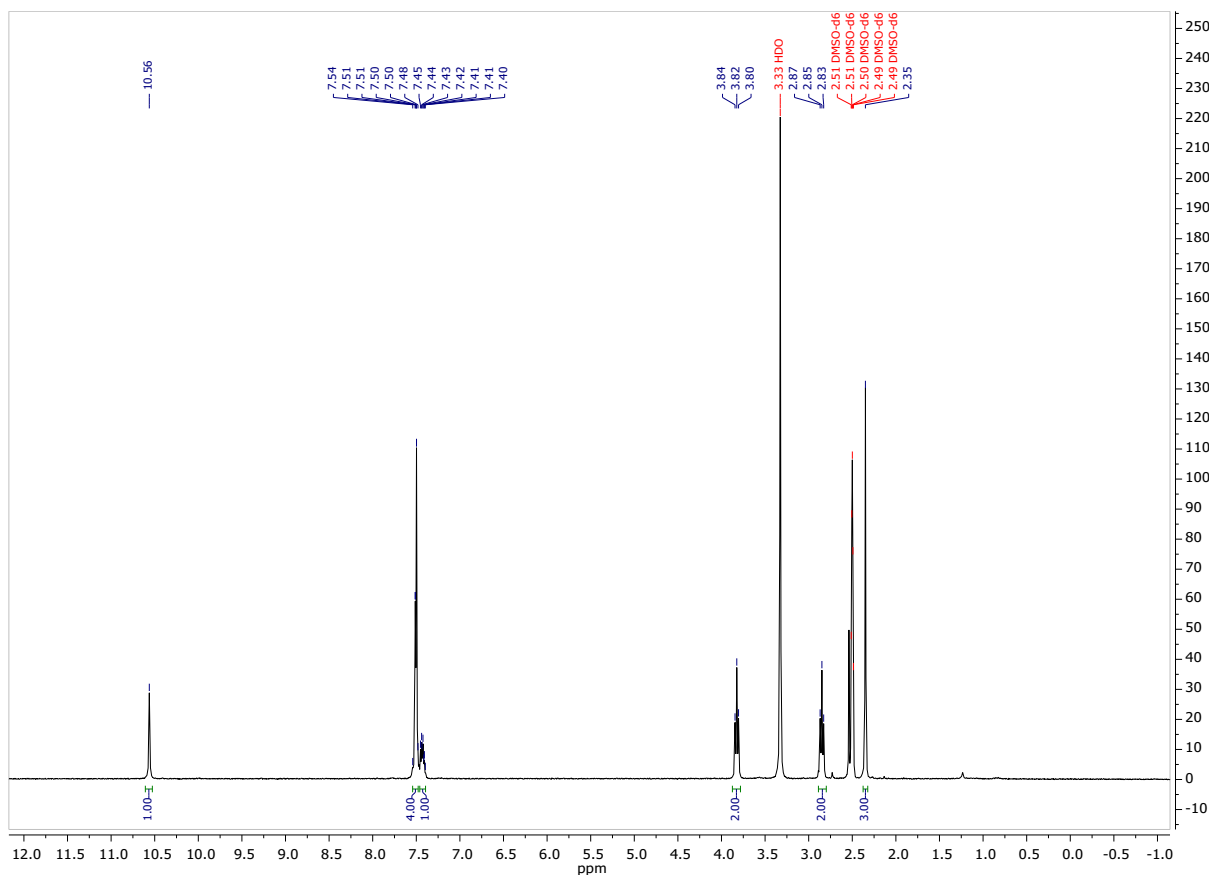

**Figure-134:**  $^{77}\text{Se}$  NMR spectrum (57 MHz) of **14** in  $\text{DMSO-}d_6$

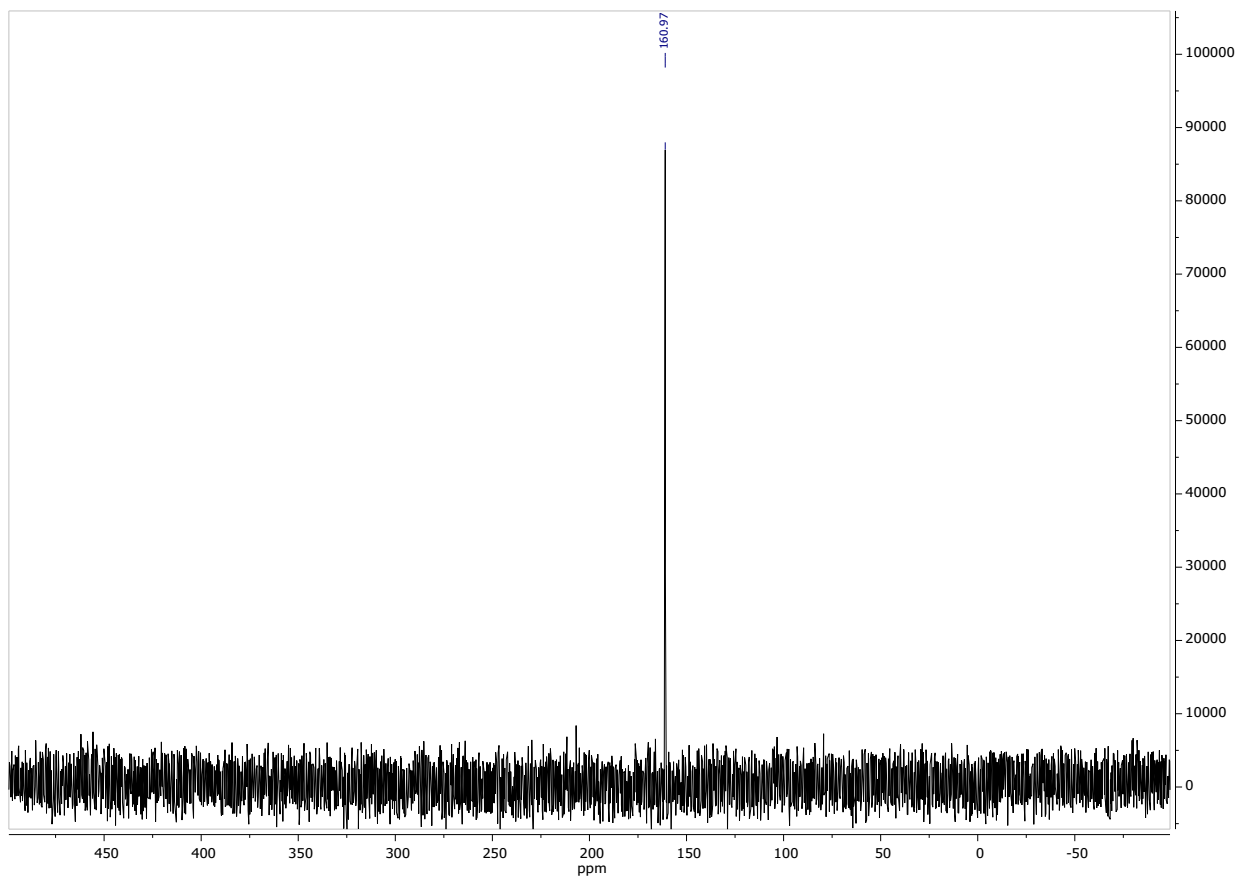

**Figure-135:**  $^{13}\text{C}$  NMR spectrum (76 MHz) of **14** in  $\text{DMSO-}d_6$

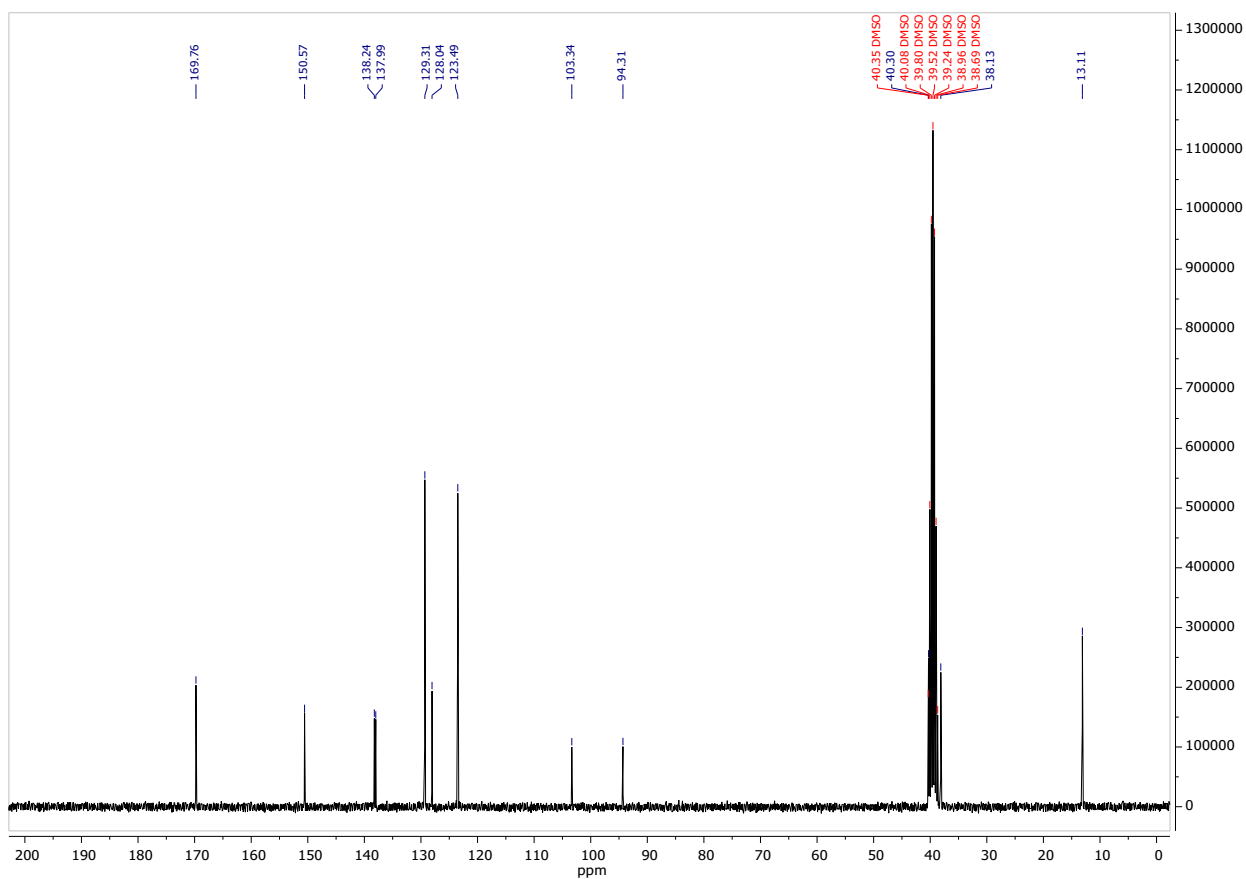

**Figure-136:** HRMS spectrum of compound **14**

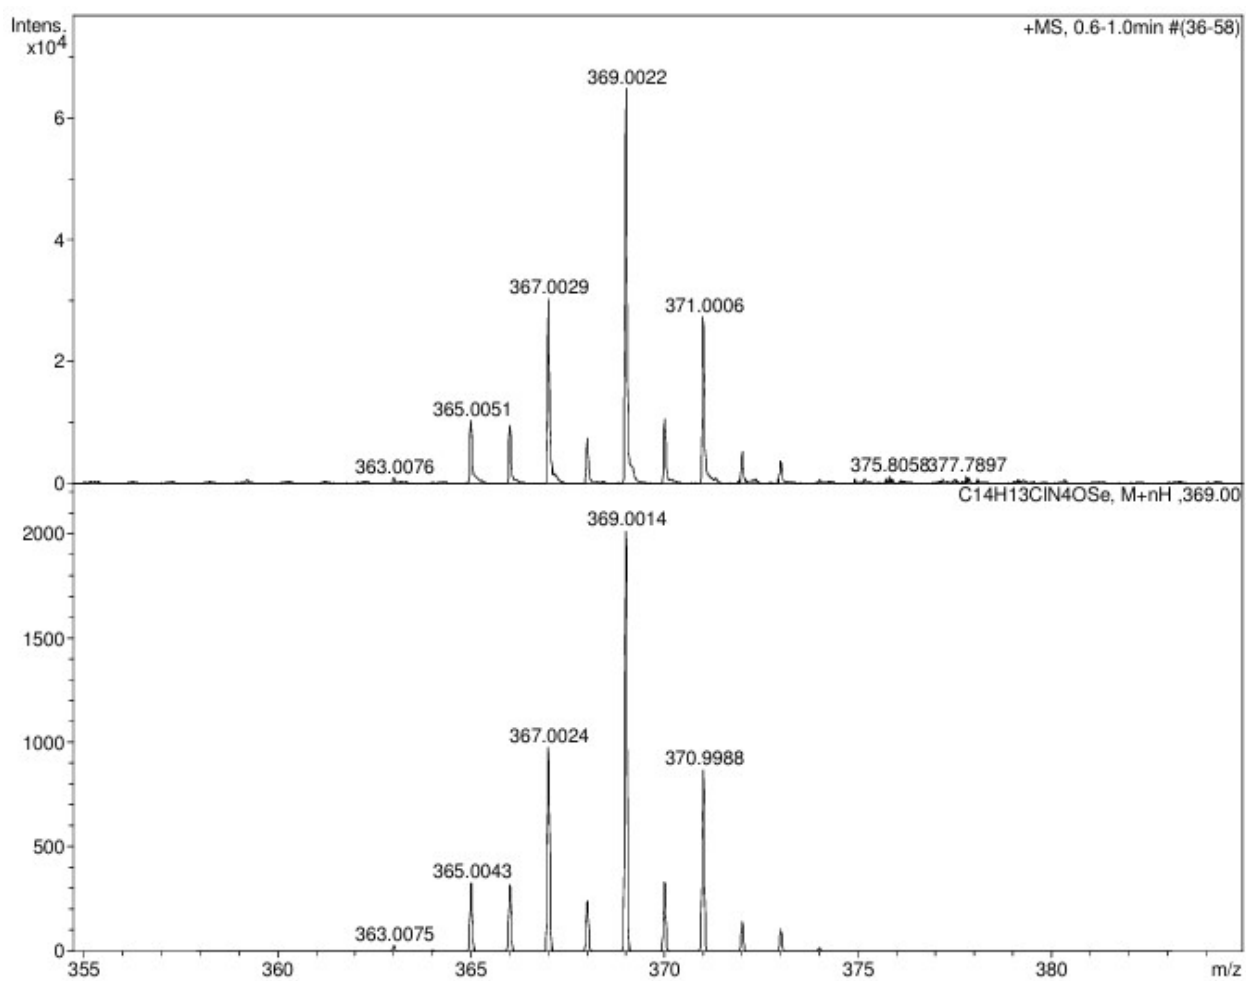

## NMR and HRMS spectra of compound **15**

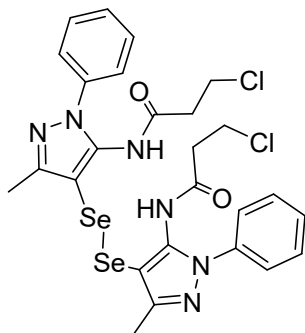

*N,N'*-(diselanediy)bis(3-methyl-1-phenyl-1H-pyrazole-4,5-diyl)bis(3-chloropropanamide), **15**

Orange powder, m.p. 150-152°C, yield 85% (0.23 g)

$^1\text{H}$  NMR (300 MHz, DMSO- $d_6$ )  $\delta$  10.13 (s, 2H), 7.52 – 7.44 (m, 8H), 7.41 – 7.35 (m, 2H), 3.74 (t,  $J = 6.1$  Hz, 4H), 2.73 (t,  $J = 6.1$  Hz, 4H), 2.13 (s, 6H).  $^{77}\text{Se}$  NMR (57 MHz, DMSO)  $\delta$  328.69.  $^{13}\text{C}\{^1\text{H}\}$  NMR (76 MHz, DMSO)  $\delta$  169.64, 151.89, 138.65, 138.36, 129.16, 127.60, 123.06, 102.32, 40.23, 38.12, 13.01. HRMS (ESI-TOF):  $m/z$   $[\text{M}+\text{H}]^+$ : calcd for  $[\text{C}_{26}\text{H}_{27}\text{Cl}_2\text{N}_6\text{O}_2\text{Se}_2]^+$ : 684.9894; found: 684.9887.

**Figure-137:**  $^1\text{H}$  NMR spectrum (300 MHz) of **15** in DMSO- $d_6$

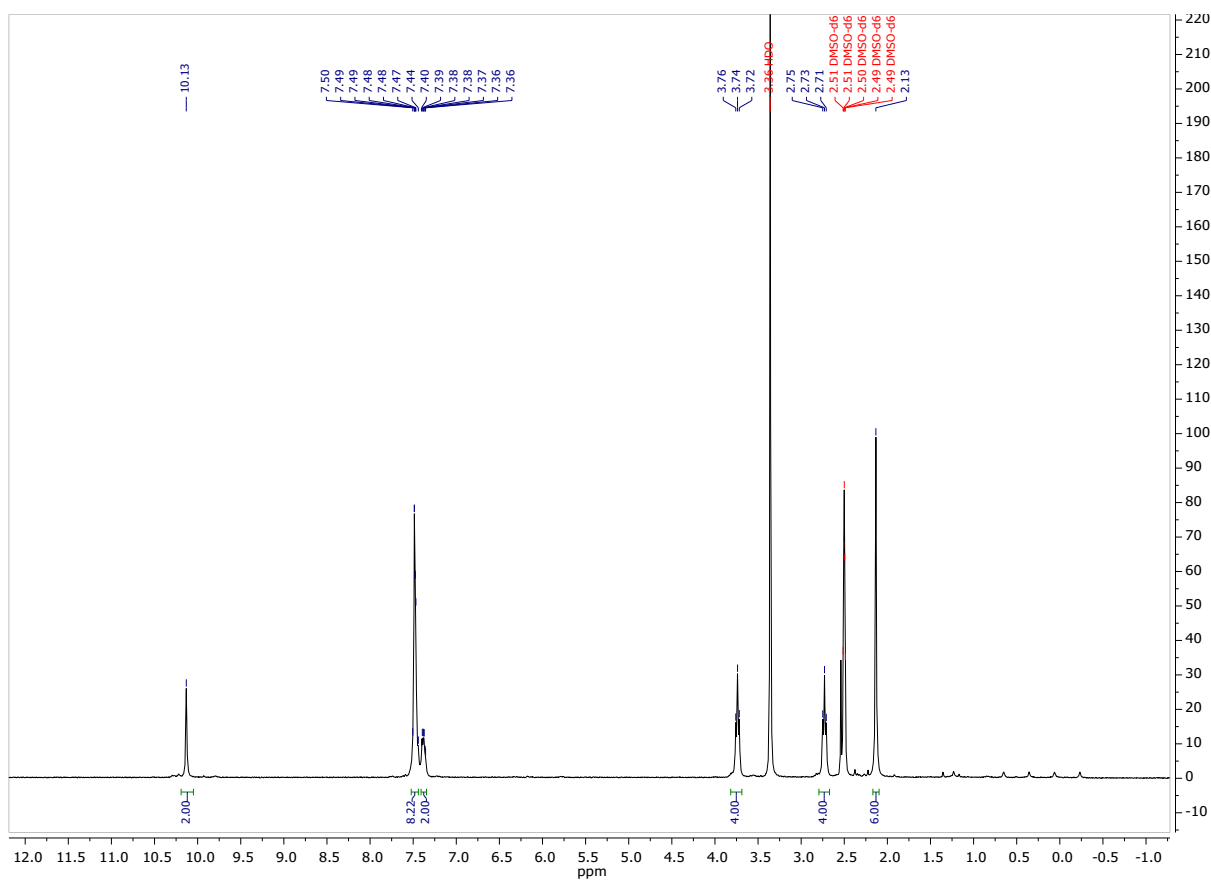

**Figure-138:**  $^{77}\text{Se}$  NMR spectrum (57 MHz) of **15** in  $\text{DMSO-}d_6$

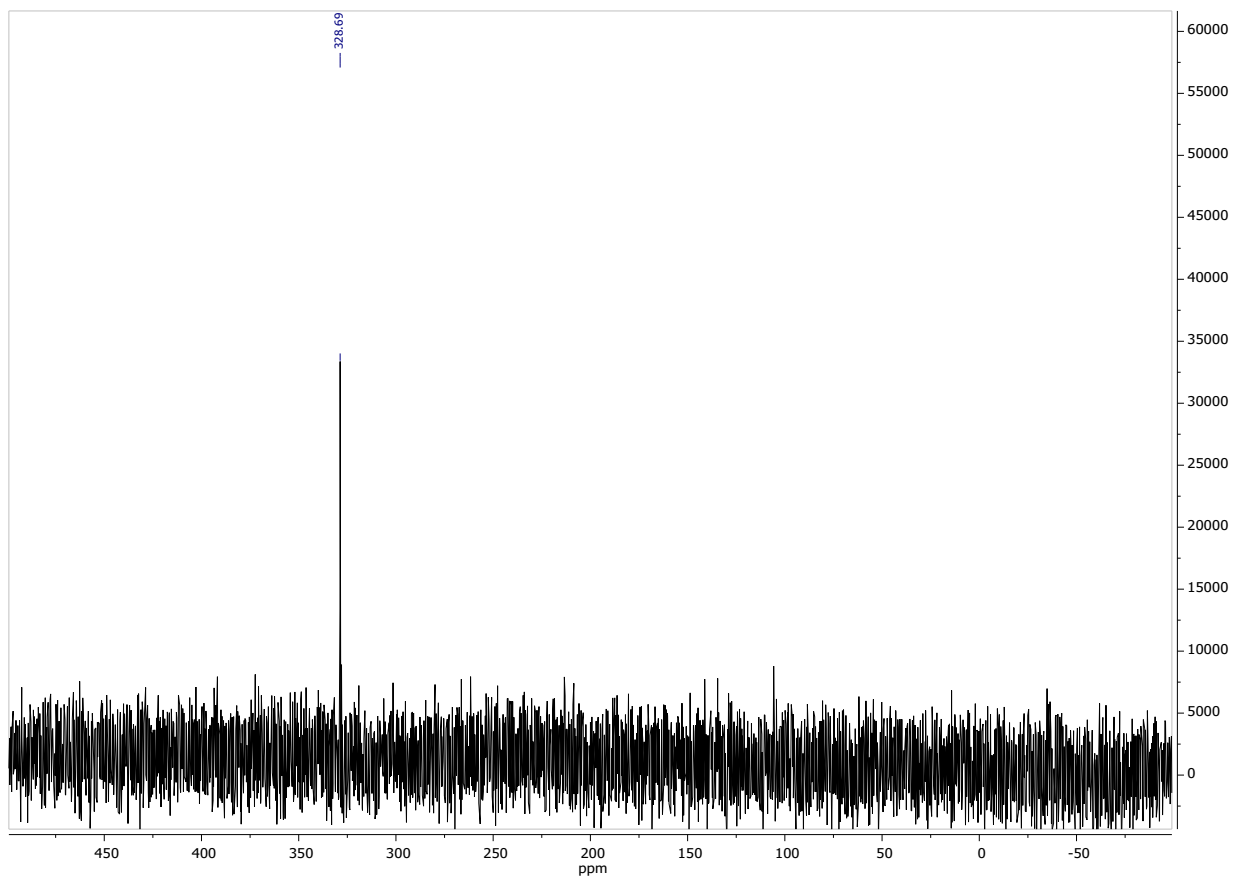

**Figure-139:**  $^{13}\text{C}$  NMR spectrum (76 MHz) of **15** in  $\text{DMSO-}d_6$

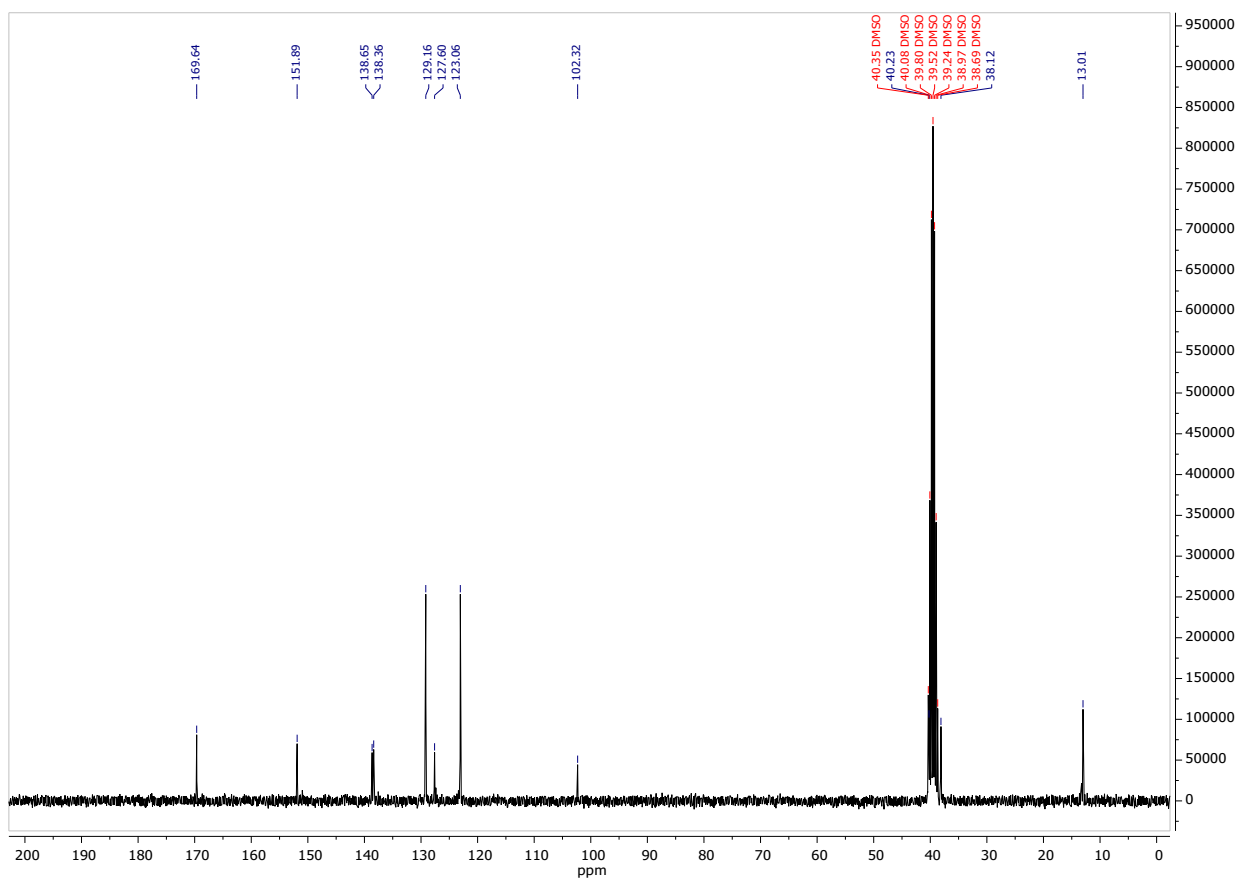

**Figure-140:** HRMS spectrum of compound 15

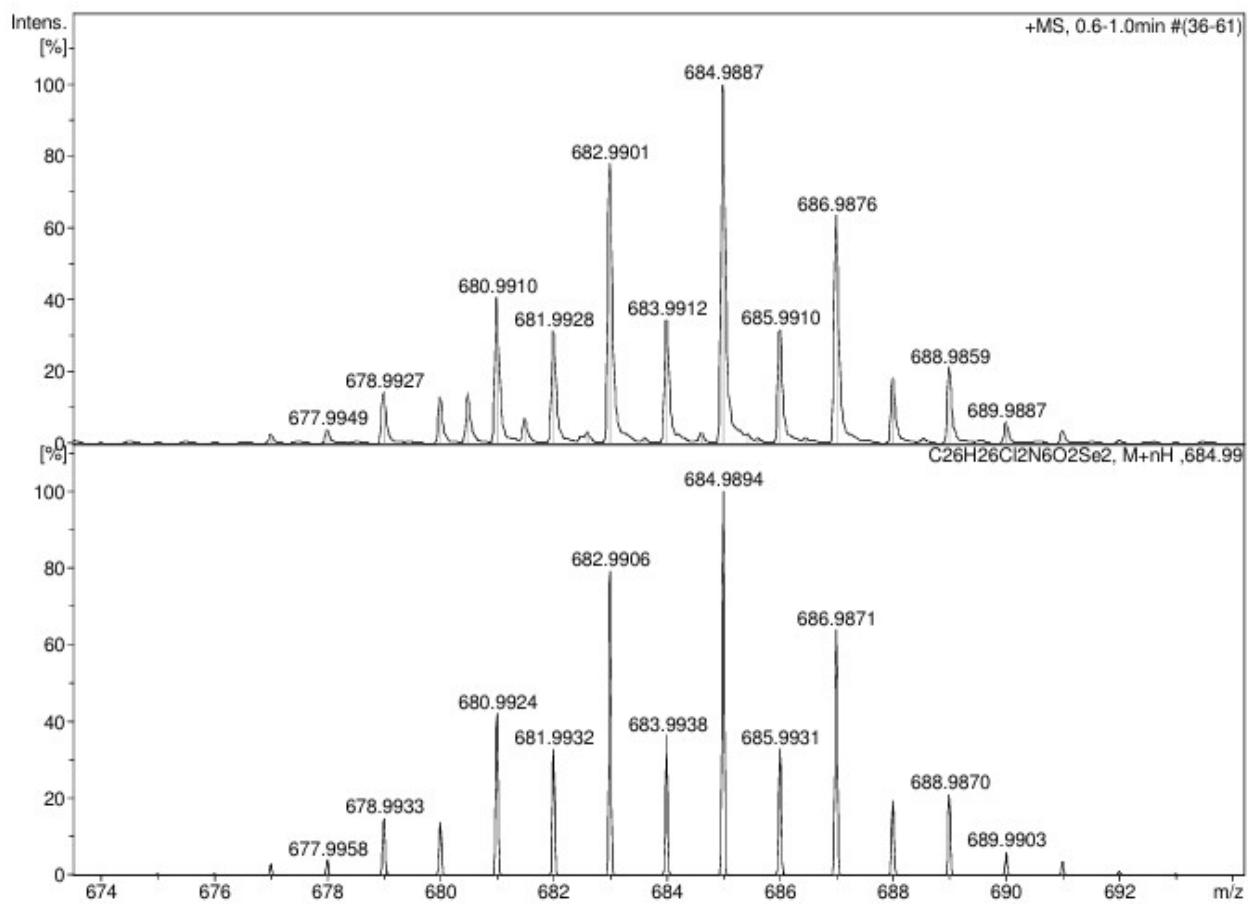

## NMR and HRMS spectra of compound 17

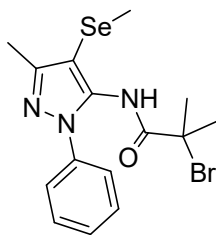

### *2-Bromo-2-methyl-N-(3-methyl-4-(methylselanyl)-1-phenyl-1H-pyrazol-5-yl)propanamide, 17a*

White powder, m.p. 151-153°C, yield 62% (0.10 g)

$^1\text{H}$  NMR (300 MHz,  $\text{DMSO-}d_6$ )  $\delta$  10.05 (s, 1H), 7.50 – 7.43 (m, 4H), 7.38 – 7.32 (m, 1H), 2.30 (s, 3H), 2.05 (s, 3H), 1.88 (s, 6H).  $^{77}\text{Se}$  NMR (57 MHz,  $\text{DMSO}$ )  $\delta$  0.28.  $^{13}\text{C}\{^1\text{H}\}$  NMR (76 MHz,  $\text{DMSO}$ )  $\delta$  171.36, 151.55, 138.54, 138.43, 129.15, 127.57, 123.11, 102.71, 59.02, 31.00, 13.38, 8.35. HRMS (ESI-TOF):  $m/z$   $[\text{M}+\text{H}]^+$ : calcd for  $[\text{C}_{15}\text{H}_{19}\text{BrN}_3\text{OSe}]^+$ : 415.9868; found: 415.9860.

**Figure-141:**  $^1\text{H}$  NMR spectrum (300 MHz) of **17a** in  $\text{DMSO-}d_6$

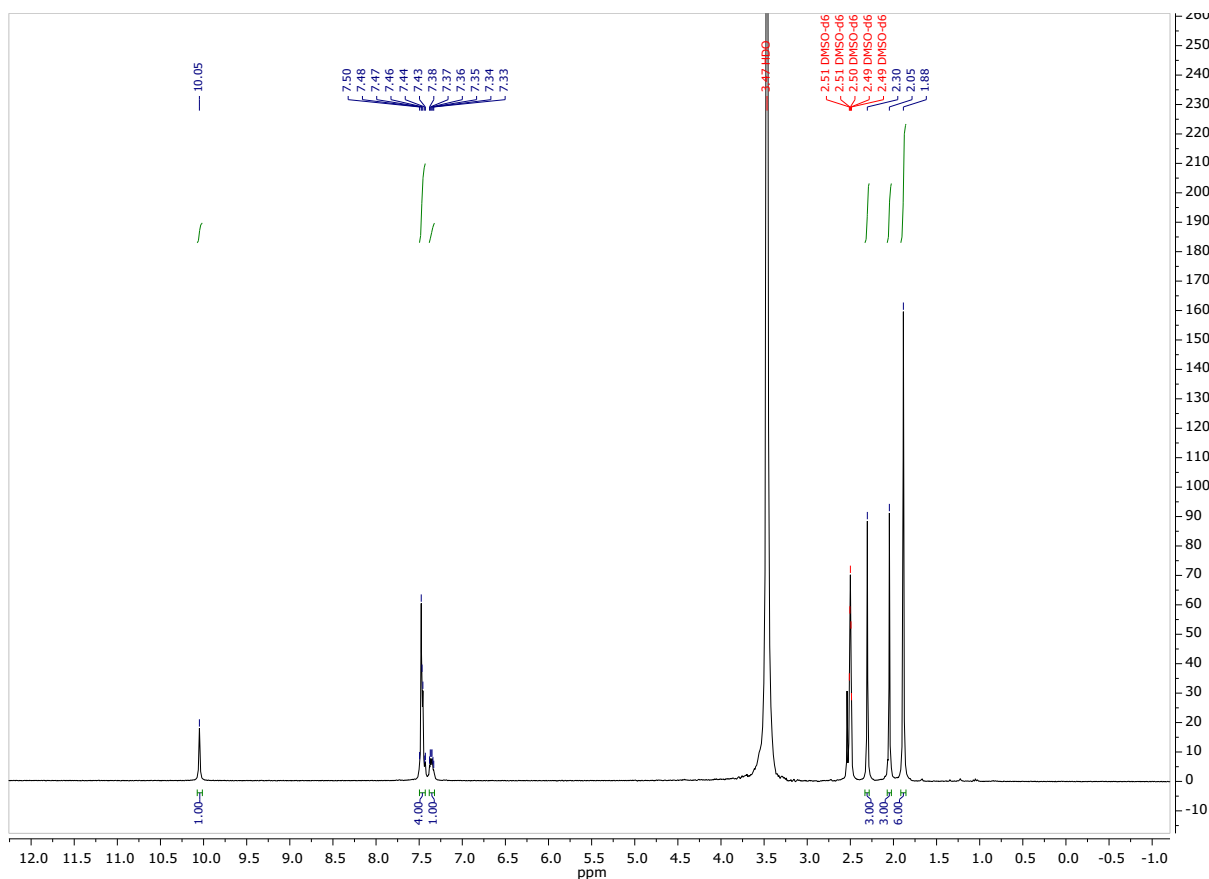

**Figure-142:**  $^{77}\text{Se}$  NMR spectrum (57 MHz) of **17a** in  $\text{DMSO-}d_6$

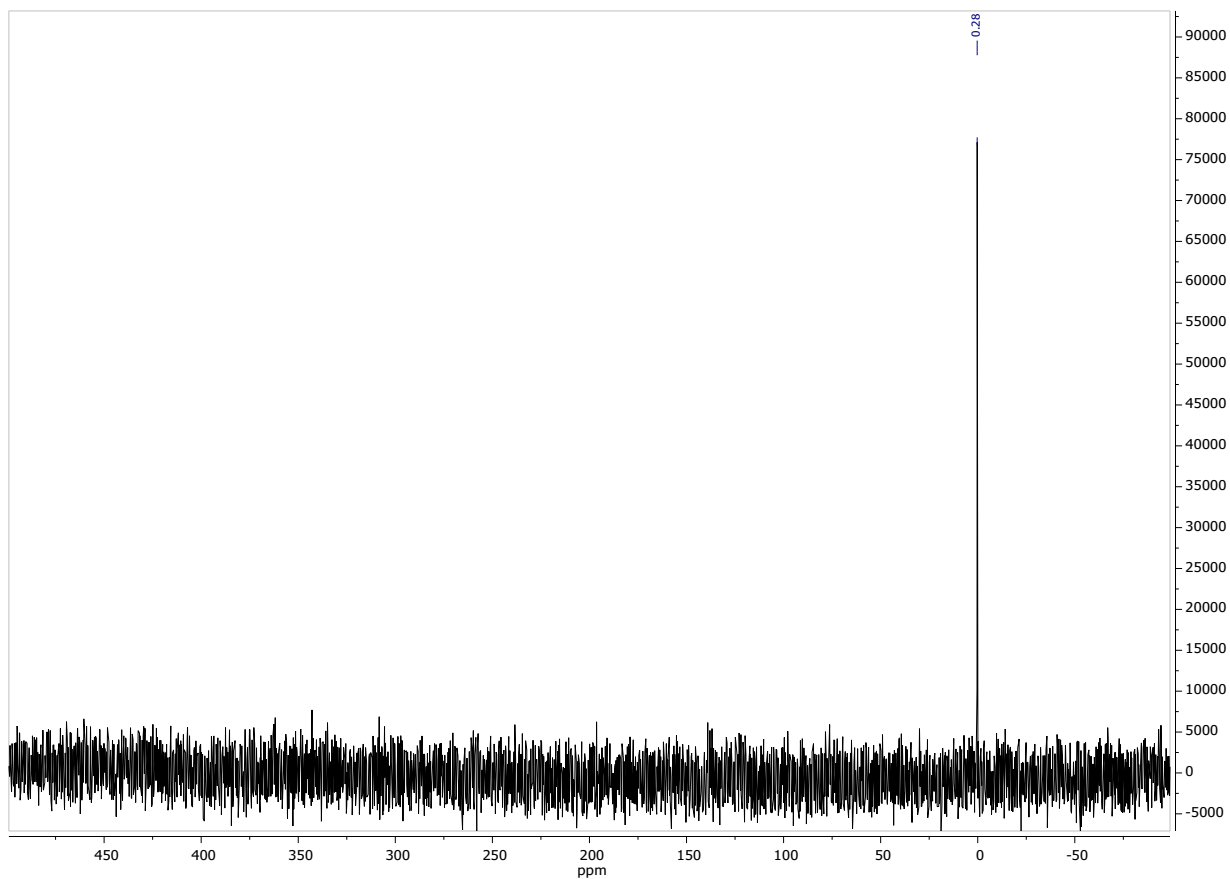

**Figure-143:**  $^{13}\text{C}$  NMR spectrum (76 MHz) of **17a** in  $\text{DMSO-}d_6$

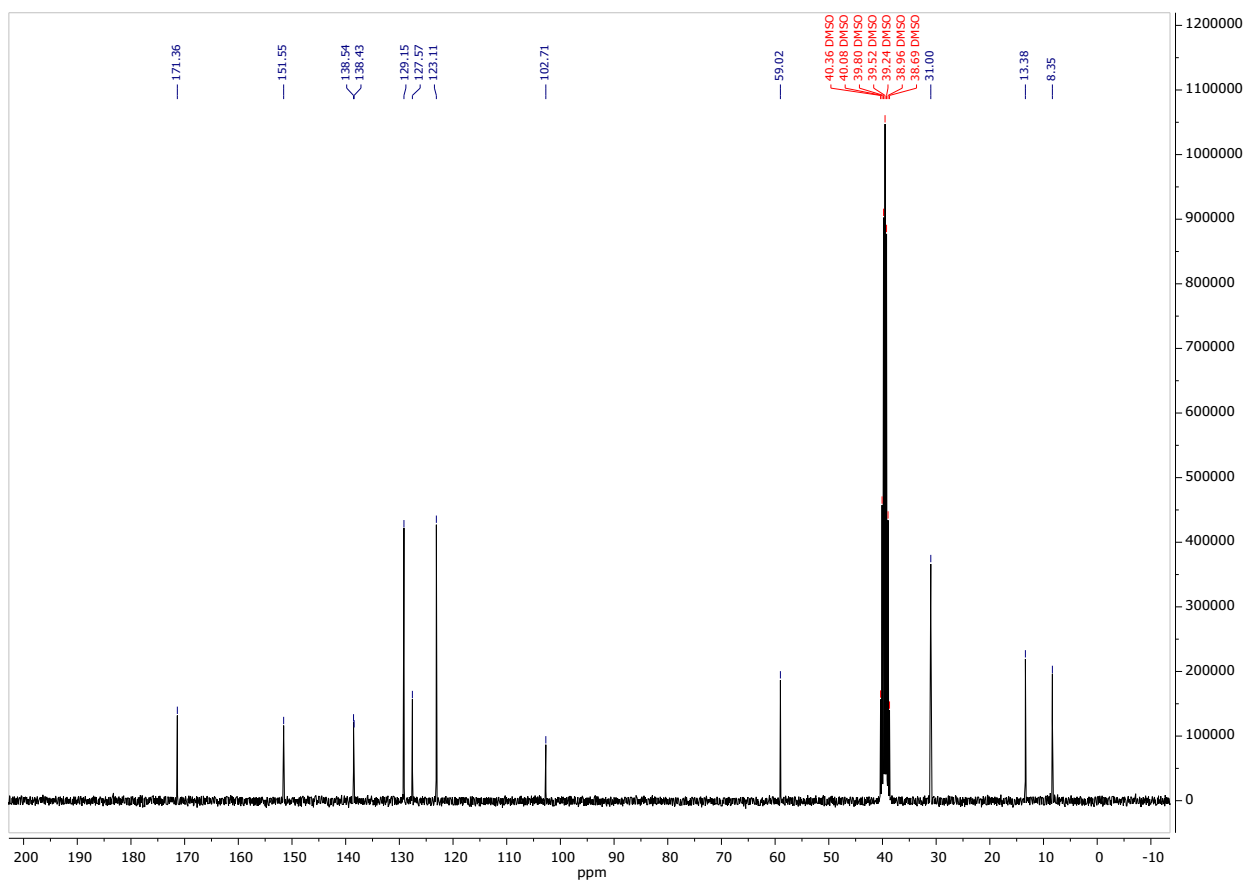

**Figure-144:** HRMS spectrum of compound 17a

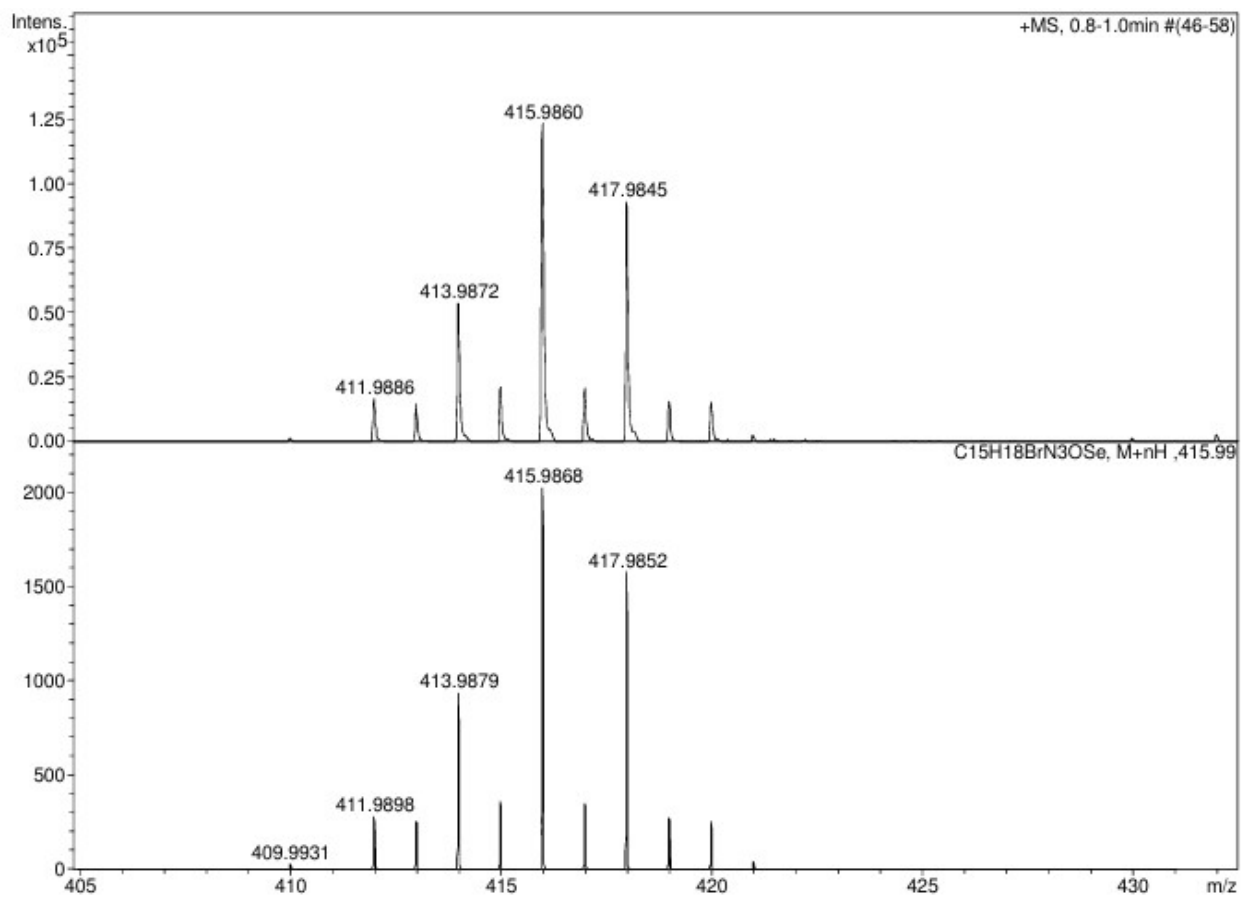

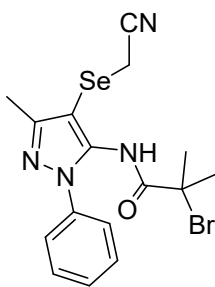

*2-Bromo-N-(4-((cyanomethyl)selenanyl)-3-methyl-1-phenyl-1H-pyrazol-5-yl)-2-methylpropanamide, 17b*

Grey powder, m.p. 130-132°C, yield 65% (0.11 g)

$^1\text{H}$  NMR (300 MHz, DMSO- $d_6$ )  $\delta$  10.19 (s, 1H), 7.57 – 7.46 (m, 4H), 7.44 – 7.37 (m, 1H), 3.54 (s, 2H), 2.40 (s, 3H), 1.91 (s, 6H).  $^{77}\text{Se}$  NMR (57 MHz, DMSO)  $\delta$  158.81.  $^{13}\text{C}\{^1\text{H}\}$  NMR (76 MHz, DMSO)  $\delta$  171.40, 152.61, 139.75, 138.13, 129.11, 127.75, 123.01, 119.07, 100.22, 58.81, 30.75, 13.21, 7.60. HRMS (ESI-TOF):  $m/z$   $[\text{M}+\text{H}]^+$ : calcd for  $[\text{C}_{16}\text{H}_{18}\text{BrN}_4\text{OSe}]^+$ : 440.9821; found: 440.9814.

**Figure-145:**  $^1\text{H}$  NMR spectrum (300 MHz) of **17b** in DMSO- $d_6$

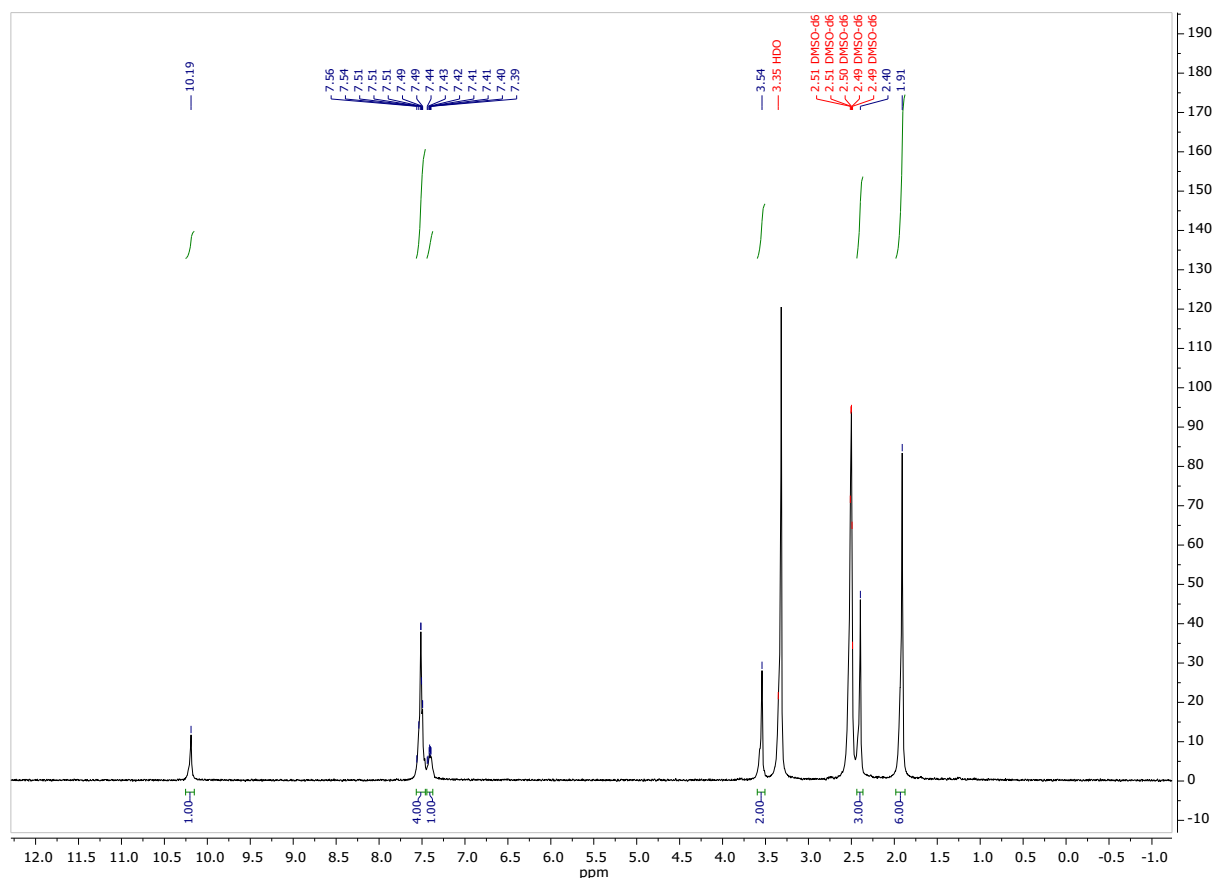

**Figure-146:**  $^{77}\text{Se}$  NMR spectrum (57 MHz) of **17b** in  $\text{DMSO-}d_6$

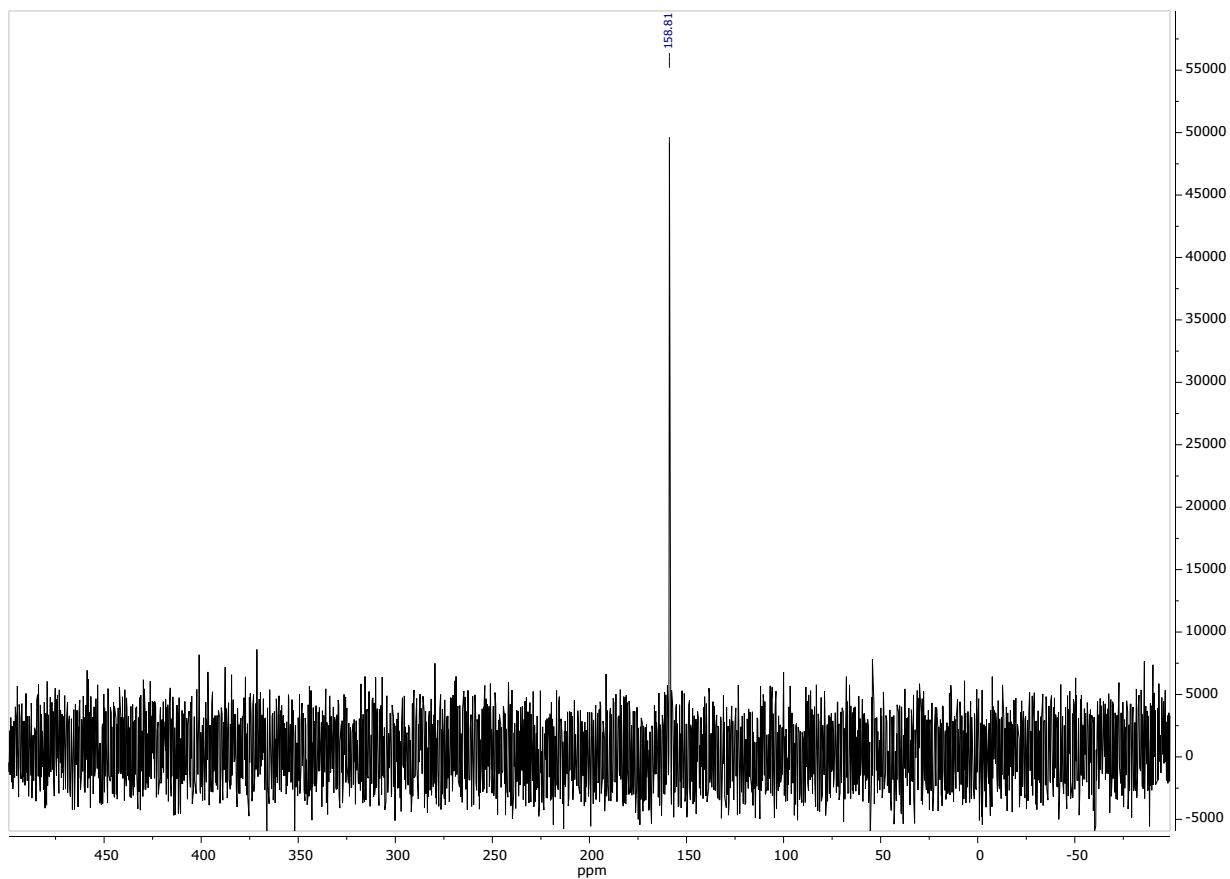

**Figure-147:**  $^{13}\text{C}$  NMR spectrum (76 MHz) of **17b** in  $\text{DMSO-}d_6$

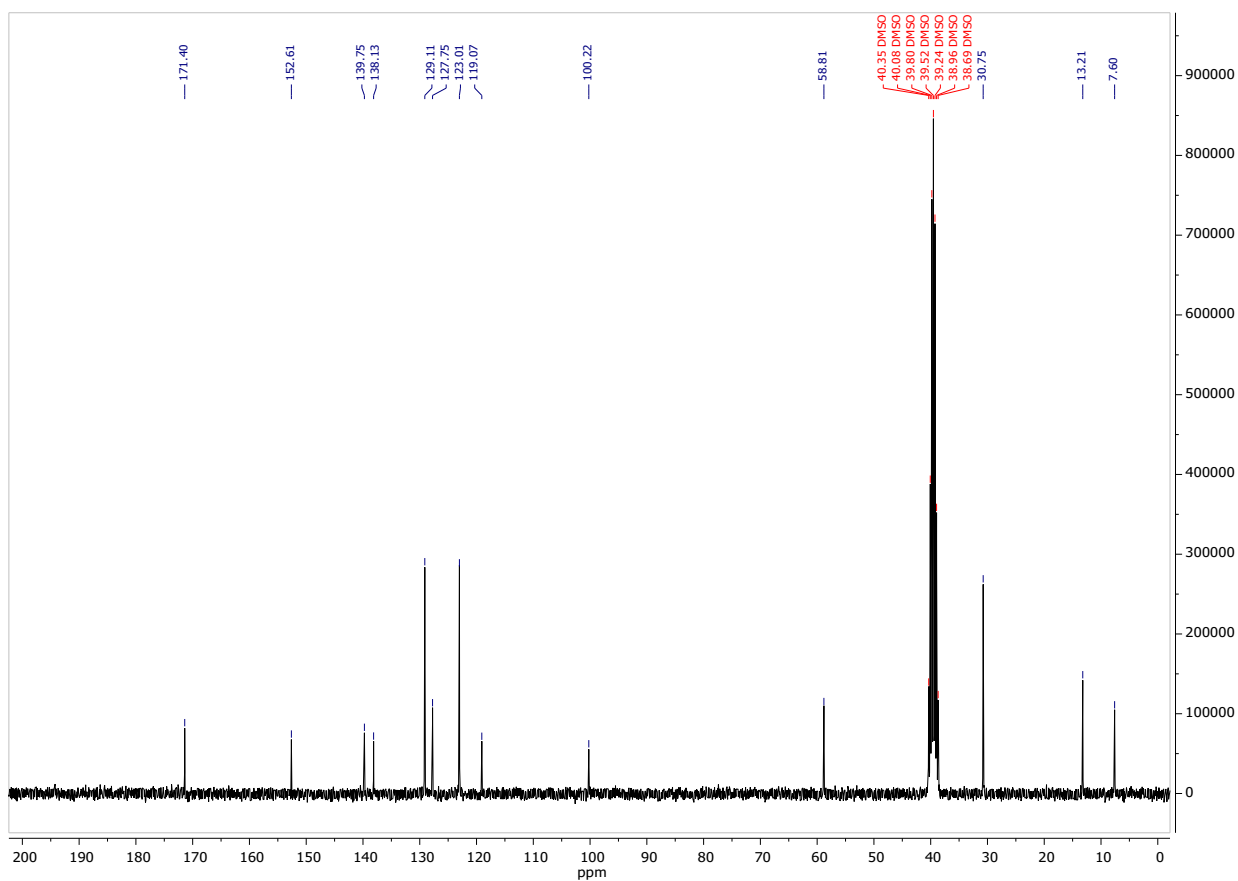

**Figure-148:** HRMS spectrum of compound **17b**

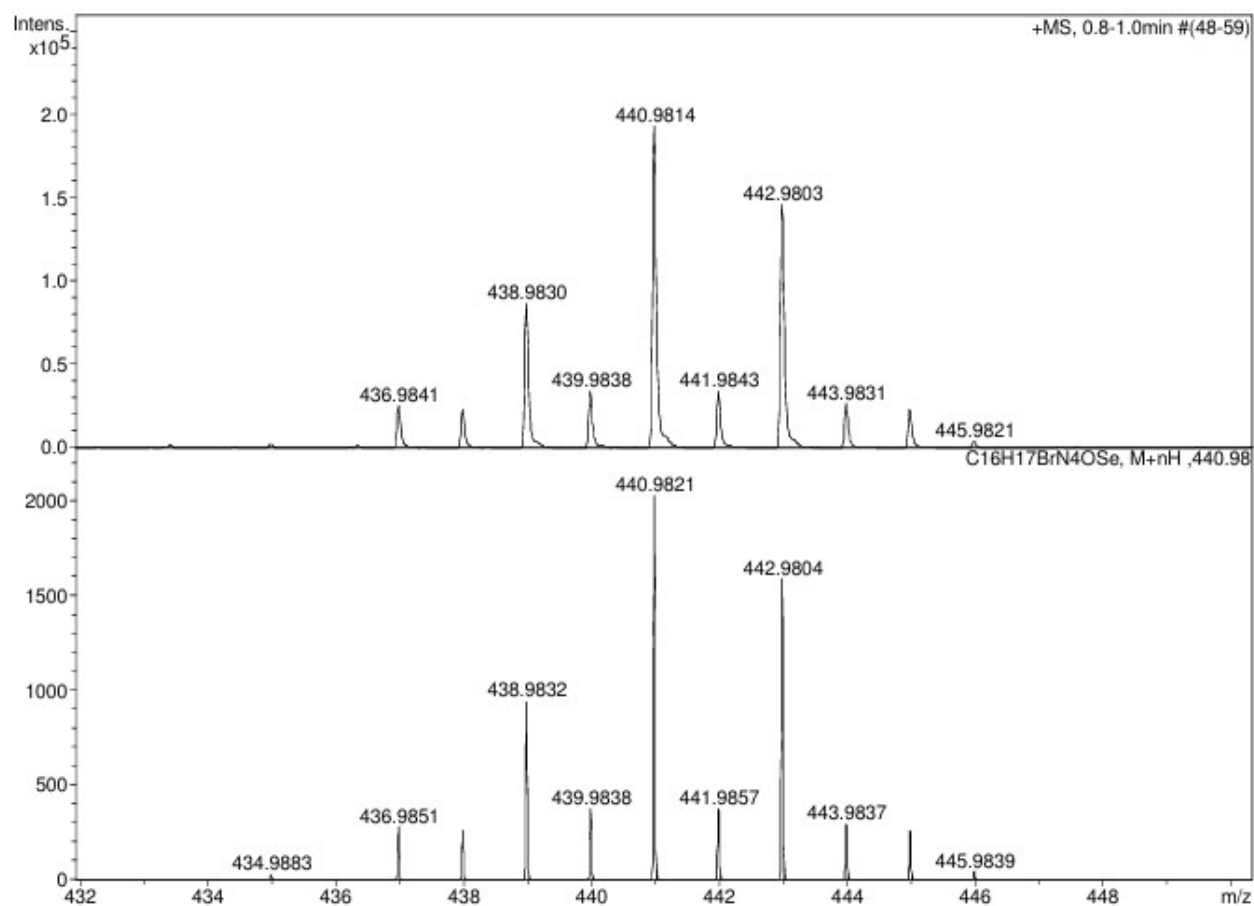

## NMR and HRMS spectra of compound 19

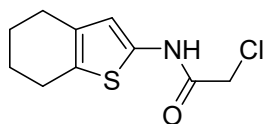

### 2-Chloro-N-(4,5,6,7-tetrahydrobenzo[b]thiophen-2-yl)acetamide, **19**

Grey powder, m.p. 185-187°C, yield 87% (0.80 g)

$^1\text{H}$  NMR (300 MHz, DMSO- $d_6$ )  $\delta$  11.24 (s, 1H), 6.40 (s, 1H), 4.22 (s, 2H), 2.61 – 2.55 (m, 2H), 2.48 – 2.40 (m, 2H), 1.78 – 1.64 (m, 4H).  $^{13}\text{C}\{^1\text{H}\}$  NMR (76 MHz, DMSO)  $\delta$  162.70, 135.60, 131.57, 126.49, 112.49, 42.61, 24.91, 23.76, 23.24, 22.59. HRMS (ESI-TOF):  $m/z$   $[\text{M}+\text{H}]^+$ : calcd for  $[\text{C}_{10}\text{H}_{13}\text{ClN}_4\text{OS}]^+$ : 230.0401; found: 230.0404.

**Figure-149:**  $^1\text{H}$  NMR spectrum (300 MHz) of **19** in DMSO- $d_6$

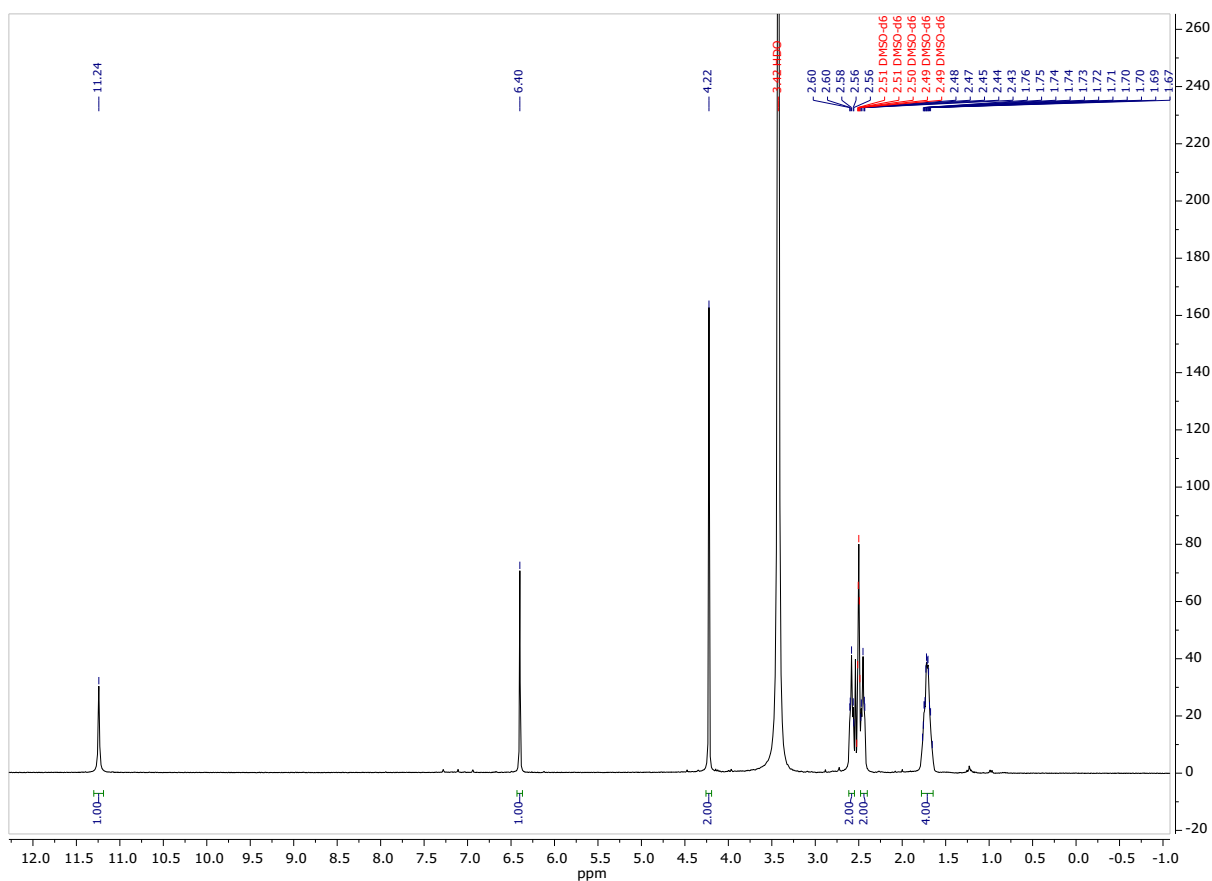

**Figure-150:**  $^{13}\text{C}$  NMR spectrum (76 MHz) of **19** in  $\text{DMSO-}d_6$

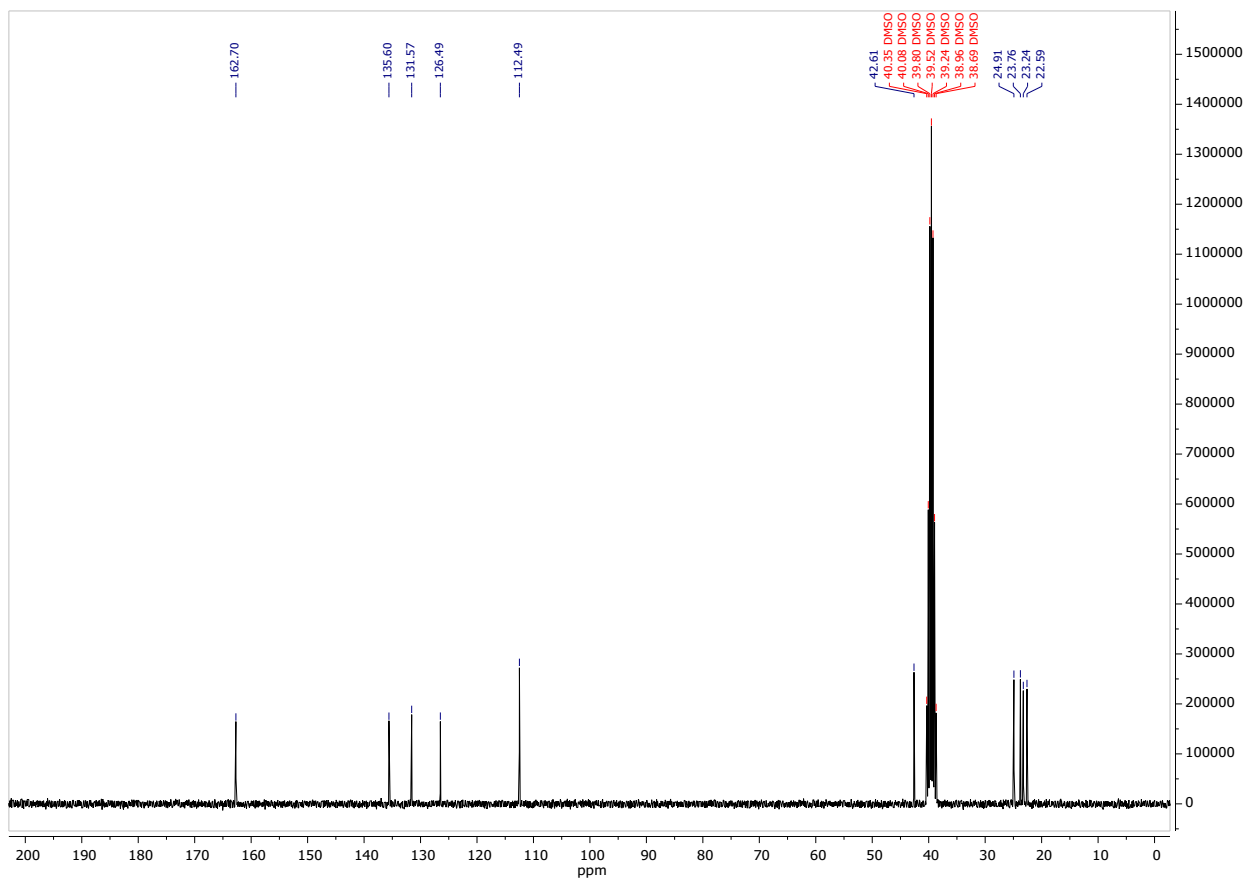

**Figure-151:** HRMS spectrum of compound **19**

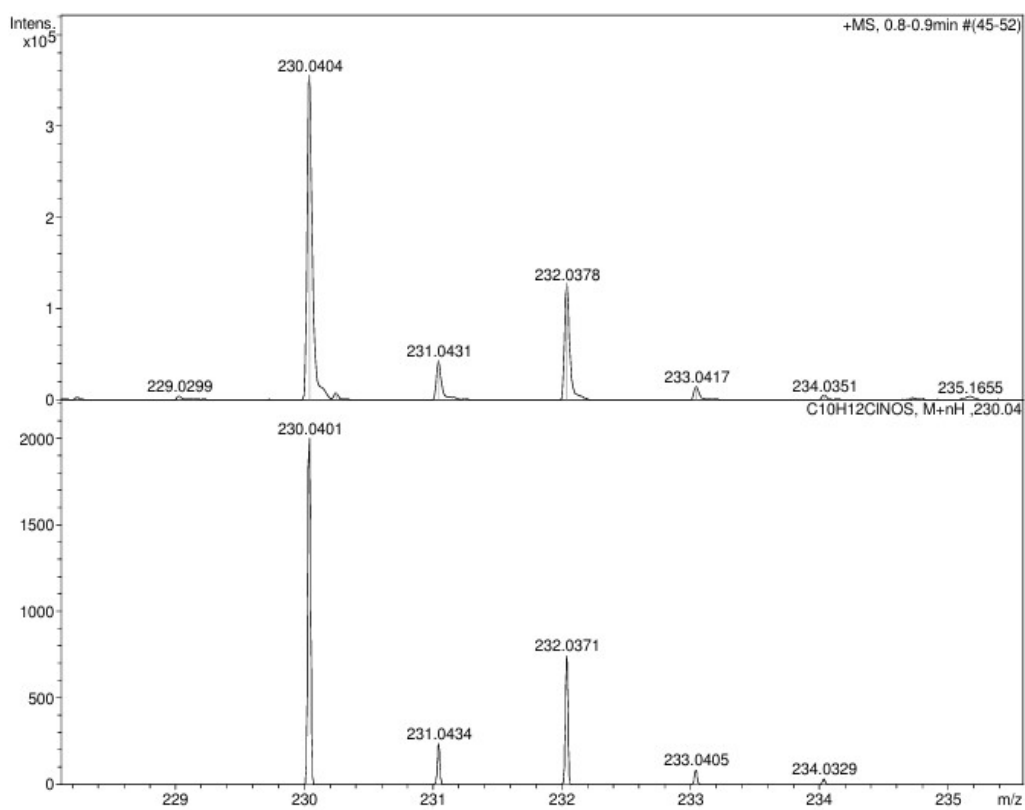

## NMR and HRMS spectra of compound **20**

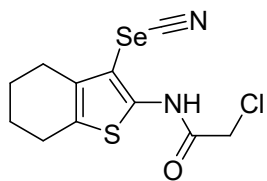

### *2-Chloro-N-(3-selenocyanato-4,5,6,7-tetrahydrobenzo[b]thiophen-2-yl)acetamide, **20***

Grey powder, m.p. 119-121°C, yield 79% (0.53 g)

$^1\text{H}$  NMR (300 MHz, DMSO- $d_6$ )  $\delta$  10.82 (s, 1H), 4.48 (s, 2H), 2.69 – 2.62 (m, 2H), 2.60 – 2.54 (m, 2H), 1.82 – 1.74 (m, 4H).  $^{77}\text{Se}$  NMR (57 MHz, DMSO)  $\delta$  172.39.  $^{13}\text{C}\{^1\text{H}\}$  NMR (76 MHz, DMSO)  $\delta$  164.61, 139.15, 133.34, 128.97, 104.31, 102.25, 42.35, 25.19, 23.93, 22.89, 22.23. HRMS (ESI-TOF):  $m/z$   $[\text{M}+\text{H}]^+$ : calcd for  $[\text{C}_{11}\text{H}_{12}\text{ClN}_2\text{OSSe}]^+$ : 334.9515; found: 334.9504.

**Figure-152:**  $^1\text{H}$  NMR spectrum (300 MHz) of **20** in DMSO- $d_6$

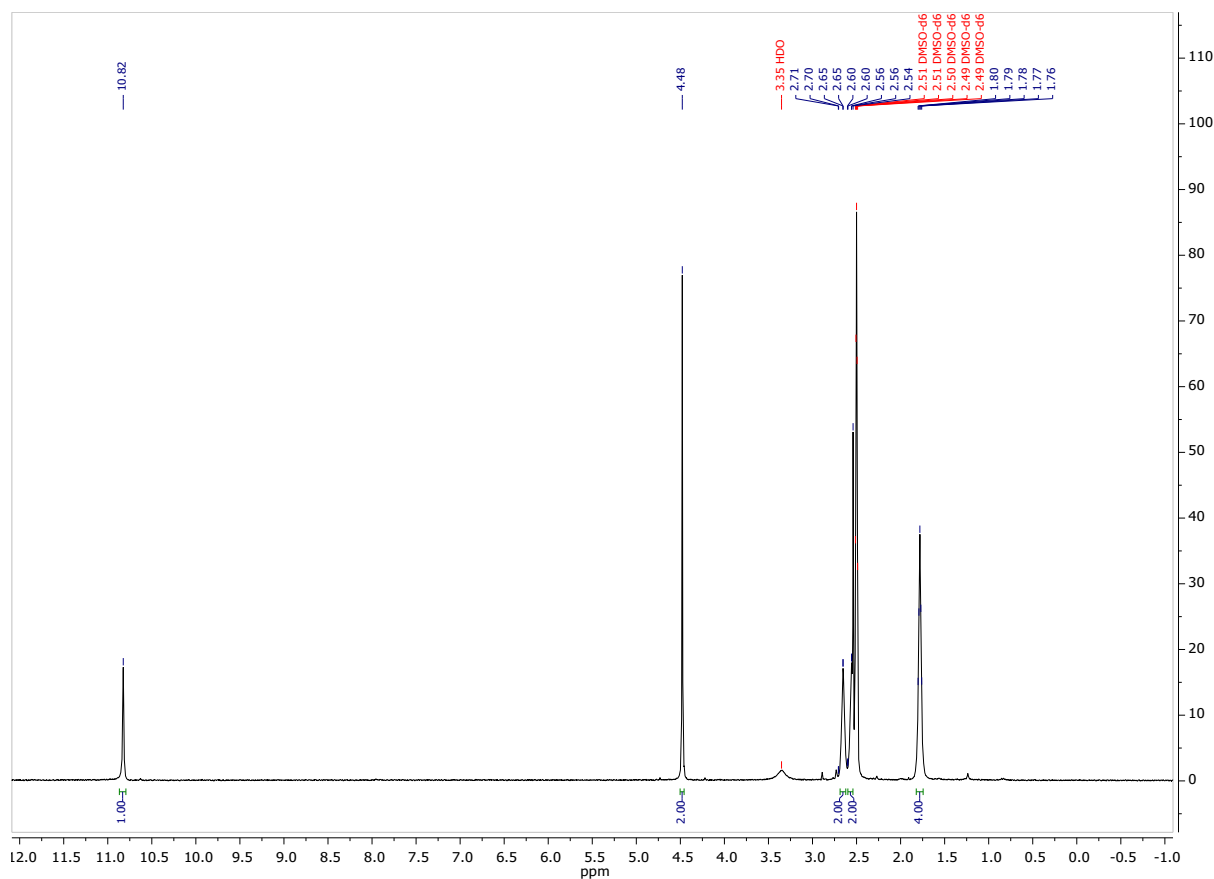

**Figure-153:**  $^{77}\text{Se}$  NMR spectrum (57 MHz) of **20** in  $\text{DMSO-}d_6$

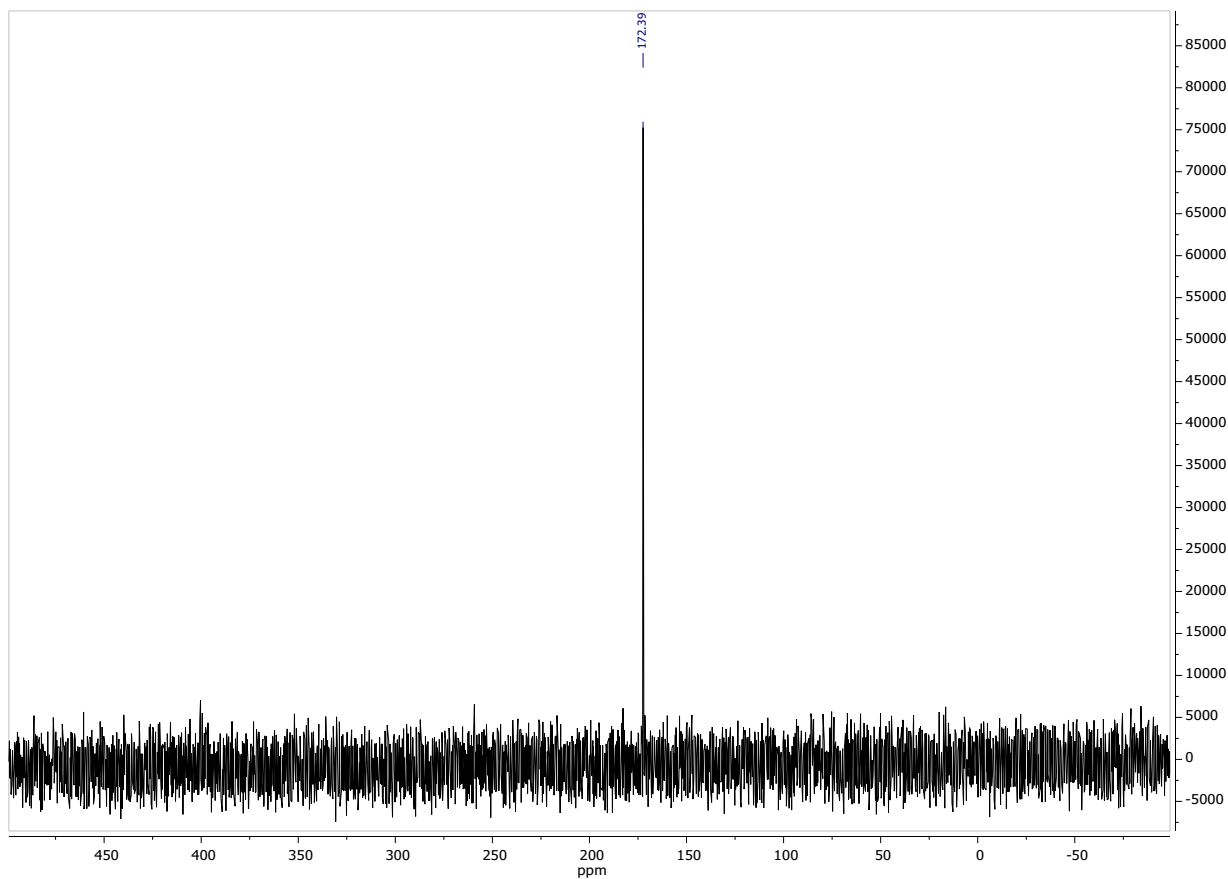

**Figure-154:**  $^{13}\text{C}$  NMR spectrum (76 MHz) of **20** in  $\text{DMSO-}d_6$

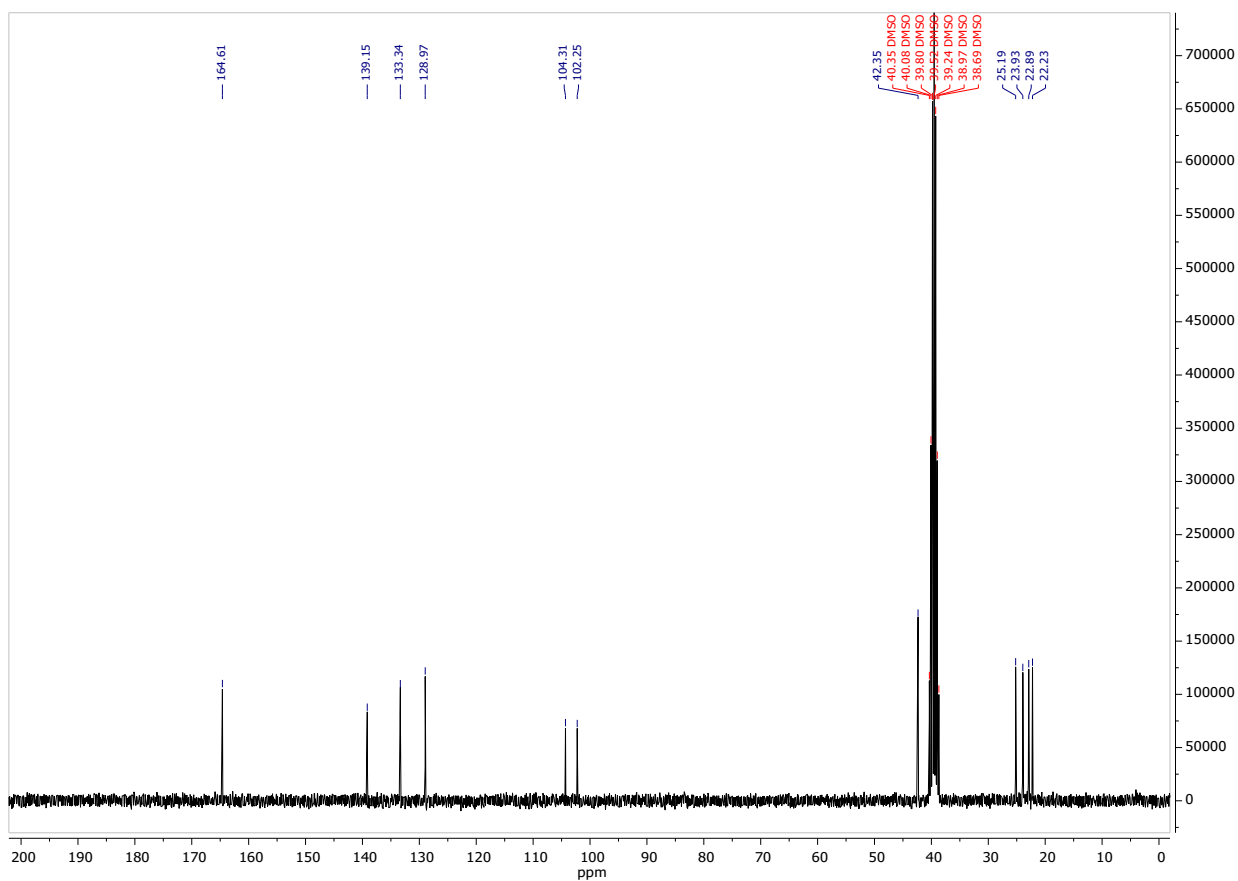

**Figure-155:** HRMS spectrum of compound **20**

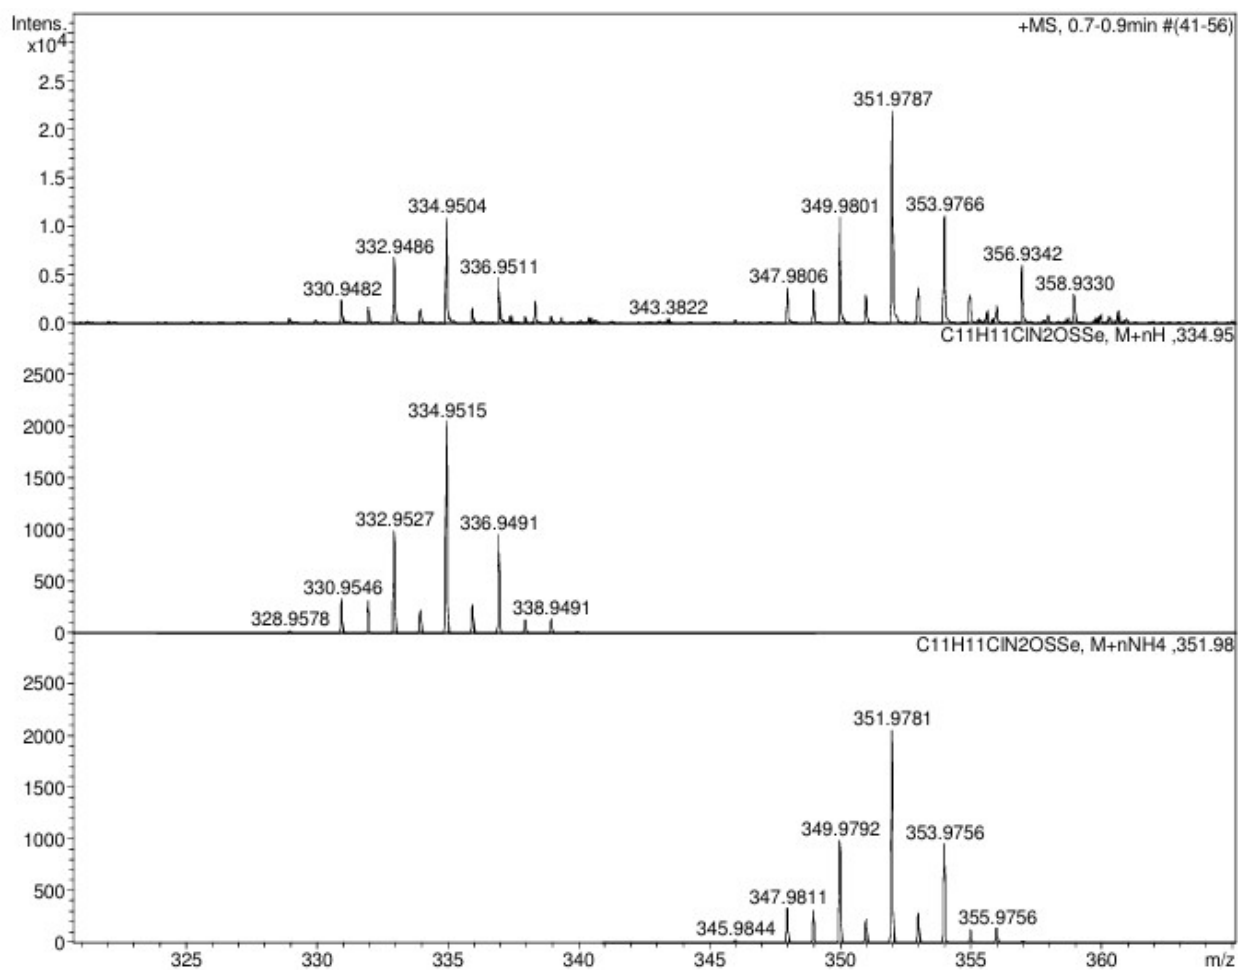

## NMR and HRMS spectra of compound **21**

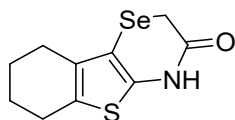

*6,7,8,9-Tetrahydro-2H-benzo[4,5]thieno[3,2-b][1,4]selenazin-3(4H)-one, 21*

Yellow powder, m.p. 223-225°C, yield 65% (0.07 g)

$^1\text{H}$  NMR (300 MHz, DMSO- $d_6$ )  $\delta$  10.54 (s, 1H), 3.33 (s, 2H), 2.62 – 2.57 (m, 2H), 2.35 – 2.28 (m, 2H), 1.77 – 1.69 (m, 4H).  $^{77}\text{Se}$  NMR (57 MHz, DMSO)  $\delta$  131.51.  $^{13}\text{C}\{^1\text{H}\}$  NMR (76 MHz, DMSO)  $\delta$  164.67, 132.47, 131.98, 125.66, 103.83, 24.70, 23.98, 22.99, 22.09, 20.66. HRMS (ESI-TOF):  $m/z$   $[\text{M}-\text{H}]^+$ : calcd for  $[\text{C}_{10}\text{H}_{10}\text{NOSse}]^+$ : 271.9642; found: 271.9642.

**Figure-156:**  $^1\text{H}$  NMR spectrum (300 MHz) of **21** in DMSO- $d_6$

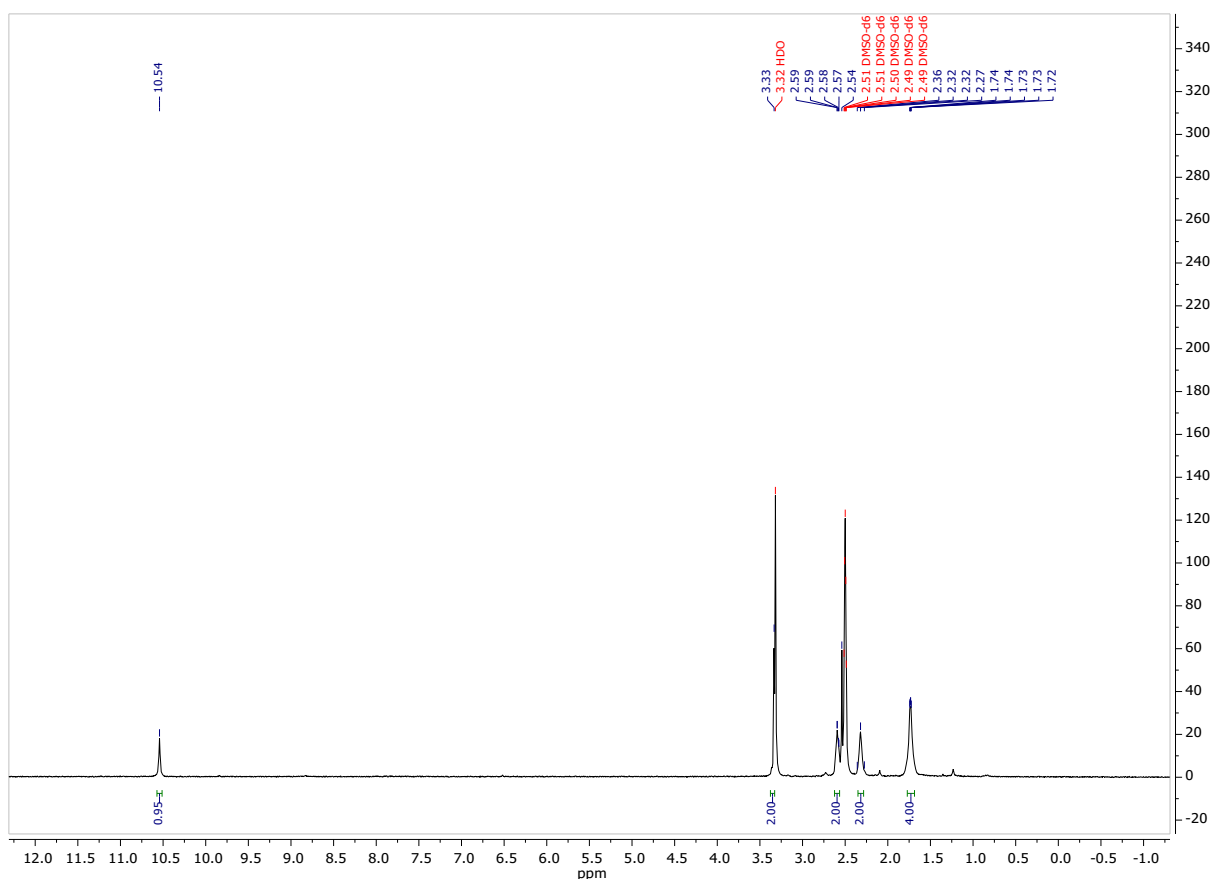

**Figure-157:**  $^{77}\text{Se}$  NMR spectrum (57 MHz) of **21** in  $\text{DMSO-}d_6$

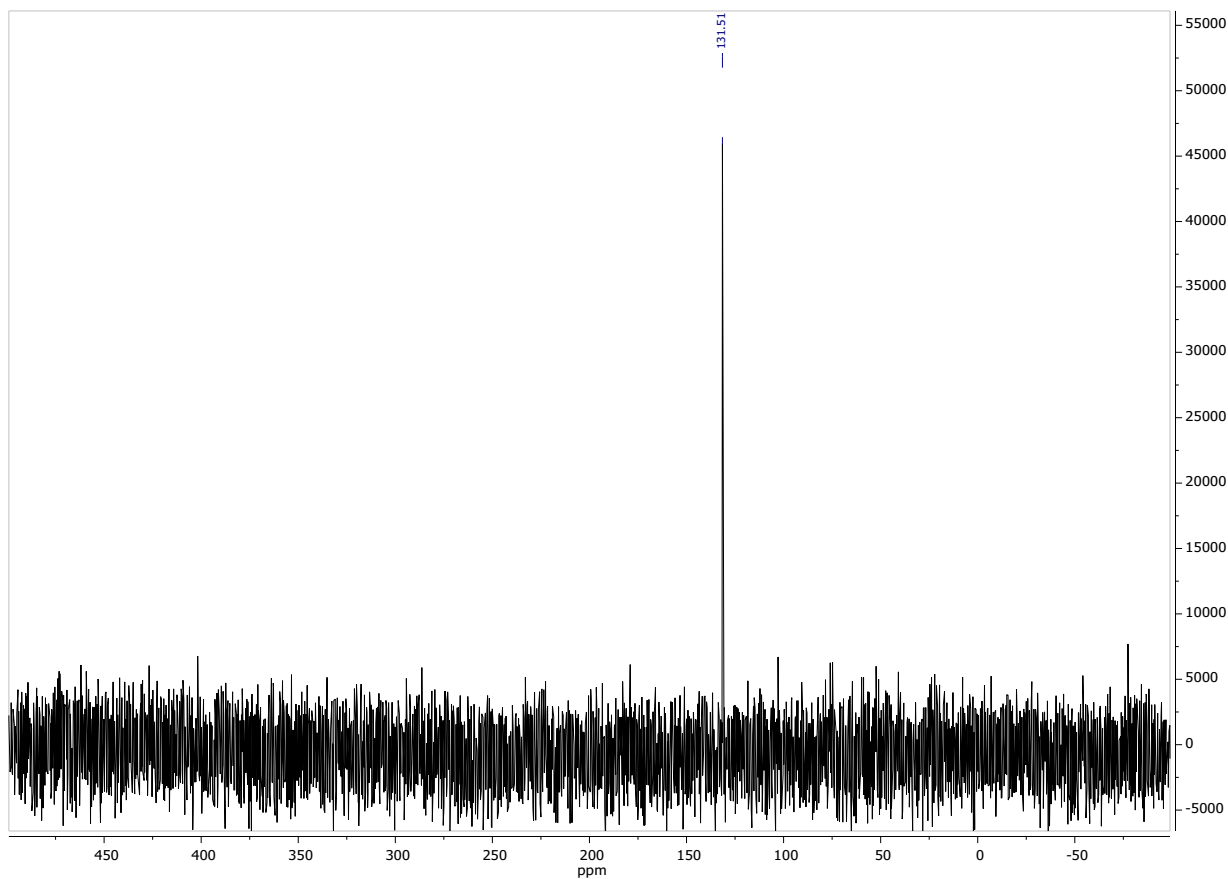

**Figure-158:**  $^{13}\text{C}$  NMR spectrum (76 MHz) of **21** in  $\text{DMSO-}d_6$

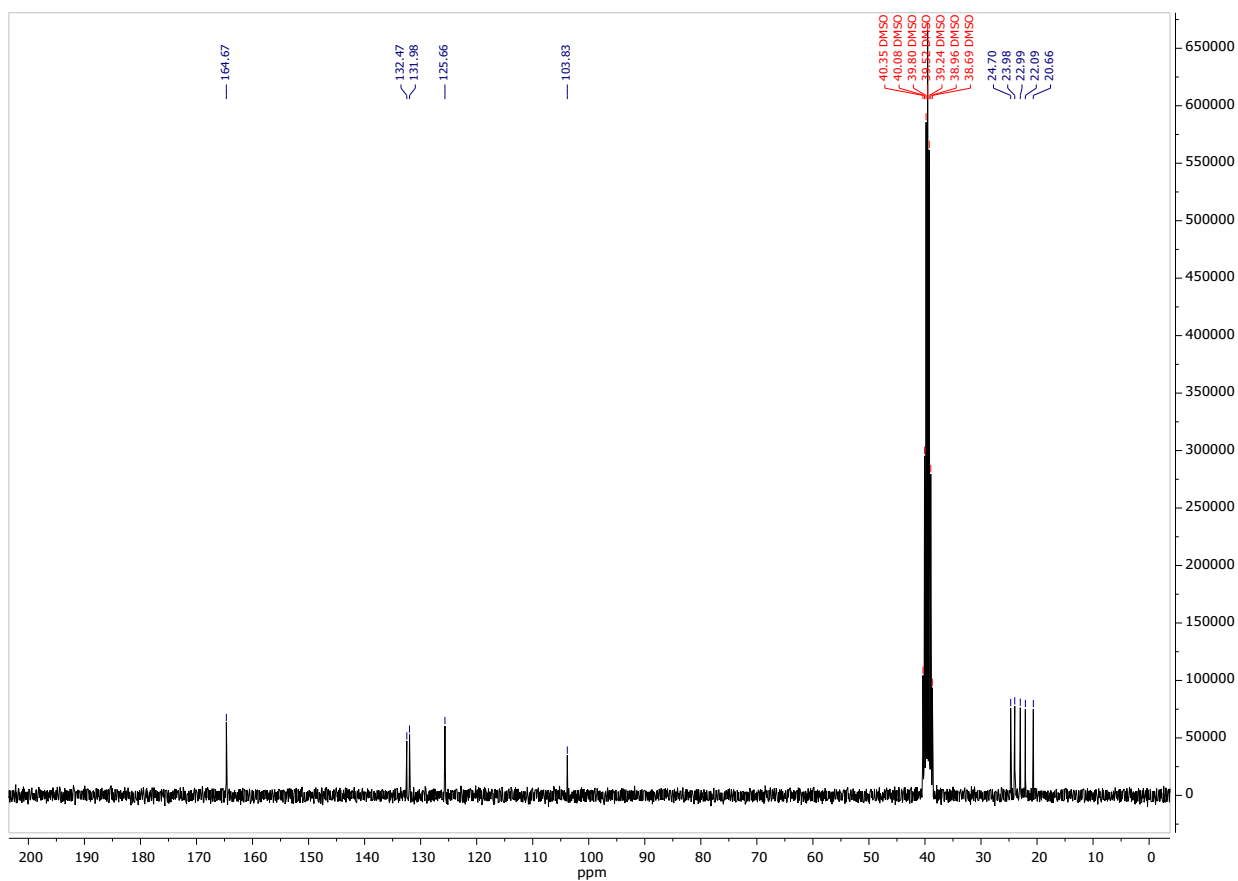

**Figure-159:** HRMS spectrum of compound **21**

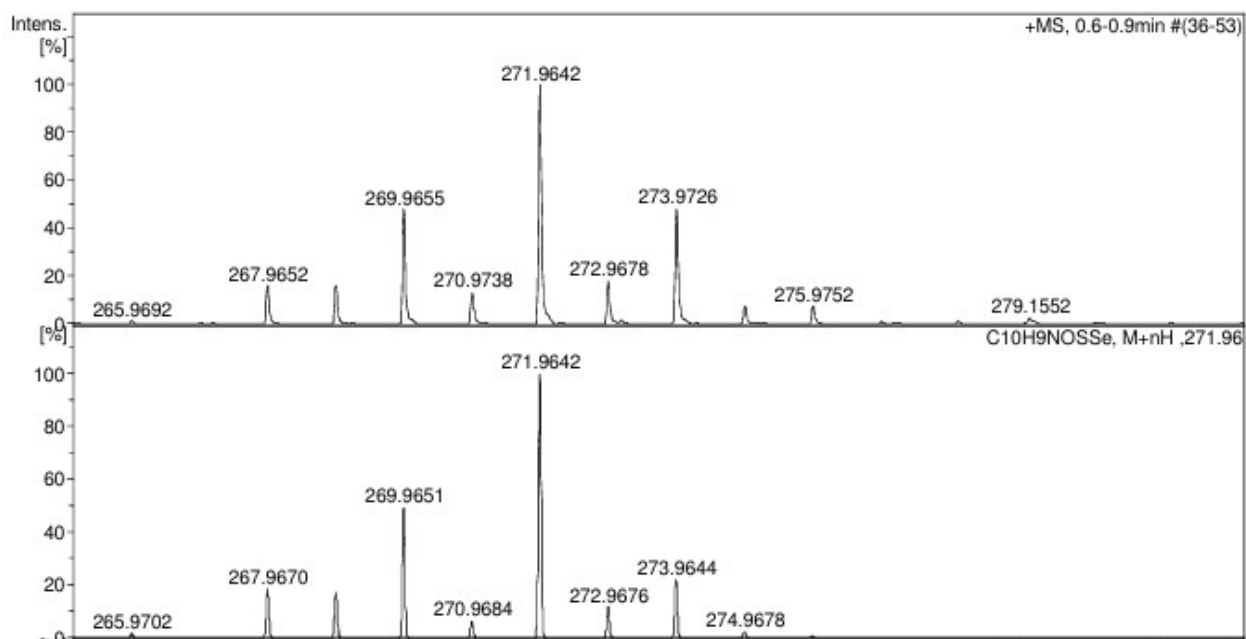

## Crystallographic data for compound **6i**

**Table 1.** Crystal data and structure refinement for **6i**.

|                                   |                                                     |                 |
|-----------------------------------|-----------------------------------------------------|-----------------|
| Identification code               | 2506169                                             |                 |
| Empirical formula                 | C <sub>14</sub> H <sub>15</sub> N <sub>3</sub> O Se |                 |
| Formula weight                    | 320.25                                              |                 |
| Temperature                       | 291.0 K                                             |                 |
| Wavelength                        | 0.71073 Å                                           |                 |
| Crystal system                    | Monoclinic                                          |                 |
| Space group                       | P 2 <sub>1</sub> /n                                 |                 |
| Unit cell dimensions              | a = 7.8853(3) Å                                     | a = 90°.        |
|                                   | b = 7.8504(3) Å                                     | b = 93.193(2)°. |
|                                   | c = 21.1466(9) Å                                    | g = 90°.        |
| Volume                            | 1307.00(9) Å <sup>3</sup>                           |                 |
| Z                                 | 4                                                   |                 |
| Density (calcd)                   | 1.628 g/cm <sup>3</sup>                             |                 |
| Absorption coefficient            | 2.868 mm <sup>-1</sup>                              |                 |
| F(000)                            | 648                                                 |                 |
| Crystal size                      | 0.319 x 0.154 x 0.036 mm <sup>3</sup>               |                 |
| Theta range for data collection   | 2.768 to 31.547°.                                   |                 |
| Index ranges                      | -11 ≤ h ≤ 11, -11 ≤ k ≤ 11, -31 ≤ l ≤ 31            |                 |
| Reflections collected             | 50591                                               |                 |
| Independent reflections           | 4373 [R(int) = 0.0404]                              |                 |
| Observed reflections              | 3854                                                |                 |
| Completeness to theta = 25.242°   | 99.9 %                                              |                 |
| Absorption correction             | Semi-empirical from equivalents                     |                 |
| Max. and min. transmission        | 0.7462 and 0.5646                                   |                 |
| Refinement method                 | Full-matrix least-squares on F <sup>2</sup>         |                 |
| Data / restraints / parameters    | 4373 / 0 / 179                                      |                 |
| Goodness-of-fit on F <sup>2</sup> | 1.060                                               |                 |
| Final R indices [I > 2σ(I)]       | R1 = 0.0225, wR2 = 0.0528                           |                 |
| R indices (all data)              | R1 = 0.0284, wR2 = 0.0556                           |                 |
| Largest diff. peak and hole       | 0.477 and -0.594 e.Å <sup>-3</sup>                  |                 |

**Table 2.** Atomic coordinates ( $\times 10^4$ ) and equivalent isotropic displacement parameters ( $\text{\AA}^2 \times 10^3$ ) for **6i**.  $U(\text{eq})$  is defined as one third of the trace of the orthogonalized  $U_{ij}$  tensor.

|       | x        | y       | z       | $U(\text{eq})$ |
|-------|----------|---------|---------|----------------|
| Se(7) | 5961(1)  | 4835(1) | 9177(1) | 15(1)          |
| O(5)  | 7852(1)  | 6991(1) | 7740(1) | 19(1)          |
| N(1)  | 1607(1)  | 3433(1) | 8133(1) | 15(1)          |
| N(4)  | 5282(1)  | 5706(1) | 7685(1) | 13(1)          |
| C(8)  | 4058(2)  | 4347(2) | 8624(1) | 13(1)          |
| C(9)  | 2490(2)  | 3525(2) | 8689(1) | 14(1)          |
| C(18) | 1771(2)  | 2845(2) | 9277(1) | 18(1)          |
| N(2)  | 2613(1)  | 4191(1) | 7703(1) | 13(1)          |
| C(10) | 2117(2)  | 4154(2) | 7046(1) | 13(1)          |
| C(11) | 3251(2)  | 3540(2) | 6620(1) | 14(1)          |
| C(12) | 2723(2)  | 3420(2) | 5980(1) | 14(1)          |
| C(16) | 3918(2)  | 2779(2) | 5502(1) | 19(1)          |
| C(13) | 1058(2)  | 3879(2) | 5791(1) | 15(1)          |
| C(14) | -76(2)   | 4486(2) | 6221(1) | 15(1)          |
| C(17) | -1882(2) | 4920(2) | 6011(1) | 19(1)          |
| C(15) | 476(2)   | 4648(2) | 6856(1) | 14(1)          |
| C(3)  | 4077(2)  | 4770(2) | 7992(1) | 12(1)          |
| C(5)  | 6901(2)  | 5910(2) | 7942(1) | 15(1)          |
| C(6)  | 7458(2)  | 4684(2) | 8465(1) | 16(1)          |

**Table 3.** Bond lengths [Å] and angles [°] for **6i**.

|                 |            |                     |            |
|-----------------|------------|---------------------|------------|
| Se(7)-C(8)      | 1.8894(12) | C(9)-C(8)-Se(7)     | 134.76(9)  |
| Se(7)-C(6)      | 1.9674(13) | C(3)-C(8)-Se(7)     | 119.99(9)  |
| O(5)-C(5)       | 1.2251(16) | C(3)-C(8)-C(9)      | 105.19(10) |
| N(1)-C(9)       | 1.3359(16) | N(1)-C(9)-C(8)      | 110.85(11) |
| N(1)-N(2)       | 1.3743(14) | N(1)-C(9)-C(18)     | 120.74(11) |
| N(4)-C(3)       | 1.3893(16) | C(8)-C(9)-C(18)     | 128.39(11) |
| N(4)-C(5)       | 1.3688(15) | C(9)-C(18)-H(18A)   | 109.5      |
| N(4)-H(4)       | 0.845(19)  | C(9)-C(18)-H(18B)   | 109.5      |
| C(8)-C(9)       | 1.4083(17) | C(9)-C(18)-H(18C)   | 109.5      |
| C(8)-C(3)       | 1.3797(16) | H(18A)-C(18)-H(18B) | 109.5      |
| C(9)-C(18)      | 1.4929(18) | H(18A)-C(18)-H(18C) | 109.5      |
| C(18)-H(18A)    | 0.9600     | H(18B)-C(18)-H(18C) | 109.5      |
| C(18)-H(18B)    | 0.9600     | N(1)-N(2)-C(10)     | 119.96(10) |
| C(18)-H(18C)    | 0.9600     | C(3)-N(2)-N(1)      | 110.89(10) |
| N(2)-C(10)      | 1.4228(15) | C(3)-N(2)-C(10)     | 128.91(10) |
| N(2)-C(3)       | 1.3541(15) | C(11)-C(10)-N(2)    | 119.25(11) |
| C(10)-C(11)     | 1.3904(17) | C(15)-C(10)-N(2)    | 118.53(11) |
| C(10)-C(15)     | 1.3891(16) | C(15)-C(10)-C(11)   | 122.12(11) |
| C(11)-H(11)     | 0.9300     | C(10)-C(11)-H(11)   | 120.5      |
| C(11)-C(12)     | 1.3956(17) | C(10)-C(11)-C(12)   | 118.91(11) |
| C(12)-C(16)     | 1.5069(18) | C(12)-C(11)-H(11)   | 120.5      |
| C(12)-C(13)     | 1.3982(17) | C(11)-C(12)-C(16)   | 120.58(11) |
| C(16)-H(16A)    | 0.9600     | C(11)-C(12)-C(13)   | 119.01(11) |
| C(16)-H(16B)    | 0.9600     | C(13)-C(12)-C(16)   | 120.40(11) |
| C(16)-H(16C)    | 0.9600     | C(12)-C(16)-H(16A)  | 109.5      |
| C(13)-H(13)     | 0.9300     | C(12)-C(16)-H(16B)  | 109.5      |
| C(13)-C(14)     | 1.3945(18) | C(12)-C(16)-H(16C)  | 109.5      |
| C(14)-C(17)     | 1.5074(17) | H(16A)-C(16)-H(16B) | 109.5      |
| C(14)-C(15)     | 1.3935(17) | H(16A)-C(16)-H(16C) | 109.5      |
| C(17)-H(17A)    | 0.9600     | H(16B)-C(16)-H(16C) | 109.5      |
| C(17)-H(17B)    | 0.9600     | C(12)-C(13)-H(13)   | 119.1      |
| C(17)-H(17C)    | 0.9600     | C(14)-C(13)-C(12)   | 121.79(11) |
| C(15)-H(15)     | 0.9300     | C(14)-C(13)-H(13)   | 119.1      |
| C(5)-C(6)       | 1.5137(18) | C(13)-C(14)-C(17)   | 120.94(11) |
| C(6)-H(6A)      | 0.9700     | C(15)-C(14)-C(13)   | 118.86(11) |
| C(6)-H(6B)      | 0.9700     | C(15)-C(14)-C(17)   | 120.18(12) |
| C(8)-Se(7)-C(6) | 90.23(5)   | C(14)-C(17)-H(17A)  | 109.5      |
| C(9)-N(1)-N(2)  | 105.52(10) | C(14)-C(17)-H(17B)  | 109.5      |
| C(3)-N(4)-H(4)  | 119.0(13)  | C(14)-C(17)-H(17C)  | 109.5      |
| C(5)-N(4)-C(3)  | 121.58(11) | H(17A)-C(17)-H(17B) | 109.5      |
| C(5)-N(4)-H(4)  | 116.4(13)  | H(17A)-C(17)-H(17C) | 109.5      |
|                 |            | H(17B)-C(17)-H(17C) | 109.5      |

|                   |            |                  |            |
|-------------------|------------|------------------|------------|
| C(10)-C(15)-C(14) | 119.27(11) | N(4)-C(5)-C(6)   | 116.21(11) |
| C(10)-C(15)-H(15) | 120.4      | Se(7)-C(6)-H(6A) | 109.4      |
| C(14)-C(15)-H(15) | 120.4      | Se(7)-C(6)-H(6B) | 109.4      |
| C(8)-C(3)-N(4)    | 128.66(11) | C(5)-C(6)-Se(7)  | 111.06(8)  |
| N(2)-C(3)-N(4)    | 123.71(11) | C(5)-C(6)-H(6A)  | 109.4      |
| N(2)-C(3)-C(8)    | 107.52(11) | C(5)-C(6)-H(6B)  | 109.4      |
| O(5)-C(5)-N(4)    | 121.27(12) | H(6A)-C(6)-H(6B) | 108.0      |
| O(5)-C(5)-C(6)    | 122.47(11) |                  |            |

Symmetry transformations used to generate equivalent atoms:

**Table 4.** Anisotropic displacement parameters ( $\text{\AA}^2 \times 10^3$ ) for **6i**. The anisotropic displacement factor exponent takes the form:  $-2p^2 [ h^2 a^*2U^{11} + \dots + 2 h k a^* b^* U^{12} ]$

|       | U11   | U22   | U33   | U23   | U13   | U12   |
|-------|-------|-------|-------|-------|-------|-------|
| Se(7) | 15(1) | 18(1) | 12(1) | -2(1) | -3(1) | 2(1)  |
| O(5)  | 13(1) | 22(1) | 22(1) | 0(1)  | 1(1)  | -4(1) |
| N(1)  | 13(1) | 17(1) | 14(1) | 0(1)  | 2(1)  | -1(1) |
| N(4)  | 11(1) | 16(1) | 13(1) | 1(1)  | -1(1) | 0(1)  |
| C(8)  | 14(1) | 16(1) | 11(1) | -1(1) | -1(1) | 1(1)  |
| C(9)  | 14(1) | 14(1) | 13(1) | 0(1)  | 2(1)  | 2(1)  |
| C(18) | 21(1) | 20(1) | 14(1) | 2(1)  | 4(1)  | 0(1)  |
| N(2)  | 10(1) | 19(1) | 11(1) | 0(1)  | 0(1)  | -2(1) |
| C(10) | 12(1) | 15(1) | 11(1) | 0(1)  | -1(1) | -2(1) |
| C(11) | 11(1) | 16(1) | 14(1) | 1(1)  | -1(1) | -1(1) |
| C(12) | 13(1) | 15(1) | 14(1) | 0(1)  | 1(1)  | -2(1) |
| C(16) | 17(1) | 24(1) | 15(1) | -3(1) | 1(1)  | 1(1)  |
| C(13) | 16(1) | 16(1) | 13(1) | 1(1)  | -2(1) | -2(1) |
| C(14) | 11(1) | 15(1) | 17(1) | 2(1)  | -2(1) | -2(1) |
| C(17) | 14(1) | 23(1) | 20(1) | 2(1)  | -3(1) | 0(1)  |
| C(15) | 11(1) | 16(1) | 15(1) | 1(1)  | 0(1)  | -1(1) |
| C(3)  | 11(1) | 14(1) | 11(1) | -2(1) | -1(1) | 1(1)  |
| C(5)  | 11(1) | 17(1) | 16(1) | -3(1) | 0(1)  | 1(1)  |
| C(6)  | 12(1) | 20(1) | 18(1) | 0(1)  | -1(1) | 3(1)  |

**Table 5.** Hydrogen coordinates ( $\times 10^4$ ) and isotropic displacement parameters ( $\text{\AA}^2 \times 10^3$ ) for **6i**.

|        | x        | y        | z       | U(eq) |
|--------|----------|----------|---------|-------|
| H(18A) | 1380     | 3773     | 9526    | 28    |
| H(18B) | 2634     | 2225     | 9518    | 28    |
| H(18C) | 838      | 2099     | 9165    | 28    |
| H(11)  | 4344     | 3216     | 6758    | 17    |
| H(16A) | 3307     | 2065     | 5199    | 28    |
| H(16B) | 4814     | 2134     | 5714    | 28    |
| H(16C) | 4394     | 3729     | 5288    | 28    |
| H(13)  | 697      | 3778     | 5366    | 18    |
| H(17A) | -2596    | 4792     | 6361    | 29    |
| H(17B) | -2265    | 4170     | 5674    | 29    |
| H(17C) | -1935    | 6077     | 5863    | 29    |
| H(15)  | -247     | 5083     | 7149    | 17    |
| H(6A)  | 8615     | 4944     | 8614    | 20    |
| H(6B)  | 7437     | 3530     | 8301    | 20    |
| H(4)   | 4950(20) | 6420(30) | 7405(9) | 24(5) |

**Table 6.** Torsion angles [°] for **6i**.

|                                   |                                     |
|-----------------------------------|-------------------------------------|
| Se(7)-C(8)-C(9)-N(1)-176.62(10)   | C(10)-C(11)-C(12)-C(16) 179.38(12)  |
| Se(7)-C(8)-C(9)-C(18)4.9(2)       | C(10)-C(11)-C(12)-C(13) -1.59(18)   |
| Se(7)-C(8)-C(3)-N(4)-7.33(18)     | C(11)-C(10)-C(15)-C(14) 1.74(19)    |
| Se(7)-C(8)-C(3)-N(2)176.44(8)     | C(11)-C(12)-C(13)-C(14) 1.32(19)    |
| O(5)-C(5)-C(6)-Se(7)123.68(12)    | C(12)-C(13)-C(14)-C(17) -178.02(12) |
| N(1)-N(2)-C(10)-C(11)-126.57(12)  | C(12)-C(13)-C(14)-C(15) 0.50(19)    |
| N(1)-N(2)-C(10)-C(15)49.99(16)    | C(16)-C(12)-C(13)-C(14) -179.66(12) |
| N(1)-N(2)-C(3)-N(4)-174.93(11)    | C(13)-C(14)-C(15)-C(10) -2.00(18)   |
| N(1)-N(2)-C(3)-C(8) 1.53(14)      | C(17)-C(14)-C(15)-C(10) 176.54(11)  |
| N(4)-C(5)-C(6)-Se(7)-58.74(13)    | C(15)-C(10)-C(11)-C(12) 0.09(19)    |
| C(9)-N(1)-N(2)-C(10)173.62(11)    | C(3)-N(4)-C(5)-O(5)-165.42(12)      |
| C(9)-N(1)-N(2)-C(3)-1.19(14)      | C(3)-N(4)-C(5)-C(6)16.98(17)        |
| C(9)-C(8)-C(3)-N(4)175.01(12)     | C(3)-C(8)-C(9)-N(1) 0.52(14)        |
| C(9)-C(8)-C(3)-N(2)-1.22(14)      | C(3)-C(8)-C(9)-C(18)-177.92(12)     |
| N(2)-N(1)-C(9)-C(8)0.38(14)       | C(3)-N(2)-C(10)-C(11)47.19(19)      |
| N(2)-N(1)-C(9)-C(18)178.96(11)    | C(3)-N(2)-C(10)-C(15)-136.25(13)    |
| N(2)-C(10)-C(11)-C(12)176.52(11)  | C(5)-N(4)-C(3)-C(8)20.53(19)        |
| N(2)-C(10)-C(15)-C(14)-174.72(11) | C(5)-N(4)-C(3)-N(2)-163.79(12)      |
| C(10)-N(2)-C(3)-N(4)10.9(2)       | C(6)-Se(7)-C(8)-C(9)149.44(13)      |
| C(10)-N(2)-C(3)-C(8)-172.68(12)   | C(6)-Se(7)-C(8)-C(3)-27.38(11)      |

Symmetry transformations used to generate equivalent atoms:

**Table 7.** Hydrogen bonds for **6i** [Å and °].

| D-H...A            | d(D-H)    | d(H...A) | d(D...A)   | <(DHA)    |
|--------------------|-----------|----------|------------|-----------|
| N(4)-H(4)...N(1)#1 | 0.845(19) | 2.27(2)  | 3.0829(15) | 161.7(17) |

Symmetry transformations used to generate equivalent atoms:

#1 -x+1/2,y+1/2,-z+3/2
